# Supplementary material for: Age, gender and UV-exposition related effects on gene expression in in vivo aged short term cultivated human dermal fibroblasts
Source: PubMed Central journal article supplement (PMC5419556; doi:10.1371/journal.pone.0175657), 2017-05-05

Age related differential expression.  
Supplemental Material for: Age related Gene  
Expression Differences on Human Dermal Fibroblasts

Wolfgang Kaisers, CBiBs HHU Düsseldorf

June 9, 2016

## Contents

|          |                                         |          |
|----------|-----------------------------------------|----------|
| <b>1</b> | <b>Differential expression analysis</b> | <b>1</b> |
| 1.1      | Sample groups . . . . .                 | 1        |
| <b>2</b> | <b>Complete gene table</b>              | <b>1</b> |
| <b>3</b> | <b>Gene list</b>                        | <b>2</b> |
| 3.1      | ATOH8 . . . . .                         | 2        |
| 3.2      | PODXL . . . . .                         | 9        |
| 3.3      | SNAI1 . . . . .                         | 16       |
| 3.4      | ID3 . . . . .                           | 23       |
| 3.5      | SPHK1 . . . . .                         | 30       |
| 3.6      | ID1 . . . . .                           | 37       |
| 3.7      | ERRFI1 . . . . .                        | 44       |
| 3.8      | PENK . . . . .                          | 51       |
| 3.9      | SEPT5 . . . . .                         | 58       |
| 3.10     | CPZ . . . . .                           | 65       |
| 3.11     | PRPS1 . . . . .                         | 72       |
| 3.12     | MEG3 . . . . .                          | 79       |
| 3.13     | CNN1 . . . . .                          | 86       |
| 3.14     | STC1 . . . . .                          | 93       |
| 3.15     | KIAA1324L . . . . .                     | 100      |
| 3.16     | TRNP1 . . . . .                         | 107      |
| 3.17     | HSPB7 . . . . .                         | 114      |
| 3.18     | PRRX2 . . . . .                         | 121      |
| 3.19     | SMAD7 . . . . .                         | 128      |
| 3.20     | FAM83G . . . . .                        | 135      |
| 3.21     | DDR1 . . . . .                          | 142      |
| 3.22     | PPP1R3C . . . . .                       | 149      |

|      |               |     |
|------|---------------|-----|
| 3.23 | EVA1A         | 156 |
| 3.24 | CRISPLD2      | 163 |
| 3.25 | RP11-309L24.6 | 170 |
| 3.26 | ZNF385D       | 177 |
| 3.27 | FGFRL1        | 184 |
| 3.28 | CKB           | 191 |
| 3.29 | FILIP1L       | 198 |
| 3.30 | GJA1          | 205 |
| 3.31 | ENC1          | 212 |
| 3.32 | SH2D4A        | 219 |
| 3.33 | ARHGAP23P1    | 226 |
| 3.34 | SERTAD1       | 233 |
| 3.35 | FGF13         | 240 |
| 3.36 | EHD1          | 247 |
| 3.37 | USP41         | 254 |
| 3.38 | ACSS3         | 261 |
| 3.39 | BACE2         | 268 |
| 3.40 | ADGRL4        | 275 |
| 3.41 | ROBO1         | 282 |
| 3.42 | KCNC4         | 289 |

## 1 Differential expression analysis

### 1.1 Sample groups

Sample groups for differential expression analysis varied by donor age. The three distinguished groups are:

- Young (18-25 years)
- Middle (35-49 years)
- Old (60-67 years)

## 2 Complete gene table

| gene_name | gene_id         | maxald | old  | seqid | strand | ID |
|-----------|-----------------|--------|------|-------|--------|----|
| ATOH8     | ENSG00000168874 | 4308   | down | 2     | +      | 1  |
| PODXL     | ENSG00000128567 | 3927   | down | 7     | -      | 2  |
| SNAI1     | ENSG00000124216 | 4575   | down | 20    | +      | 3  |
| ID3       | ENSG00000117318 | 19530  | down | 1     | -      | 4  |
| SPHK1     | ENSG00000176170 | 6585   | down | 17    | +      | 5  |
| ID1       | ENSG00000125968 | 14913  | down | 20    | +      | 6  |

Continued on next page

| gene_name     | gene_id         | maxald | old  | seqid | strand | ID |
|---------------|-----------------|--------|------|-------|--------|----|
| ERRFI1        | ENSG00000116285 | 1776   | down | 1     | -      | 7  |
| PENK          | ENSG00000181195 | 2554   | up   | 8     | -      | 8  |
| SEPT5         | ENSG00000184702 | 1468   | down | 22    | +      | 9  |
| CPZ           | ENSG00000109625 | 2585   | up   | 4     | +      | 10 |
| PRPS1         | ENSG00000147224 | 5550   | down | X     | +      | 11 |
| MEG3          | ENSG00000214548 | 3031   | down | 14    | +      | 12 |
| CNN1          | ENSG00000130176 | 16224  | down | 19    | +      | 13 |
| STC1          | ENSG00000159167 | 1877   | up   | 8     | -      | 14 |
| KIAA1324L     | ENSG00000164659 | 1751   | up   | 7     | -      | 15 |
| TRNP1         | ENSG00000253368 | 3613   | down | 1     | +      | 16 |
| HSPB7         | ENSG00000173641 | 14954  | down | 1     | -      | 17 |
| PRRX2         | ENSG00000167157 | 6616   | down | 9     | +      | 18 |
| SMAD7         | ENSG00000101665 | 3768   | down | 18    | -      | 19 |
| FAM83G        | ENSG00000188522 | 523    | down | 17    | -      | 20 |
| DDR1          | ENSG00000204580 | 606    | down | 6     | +      | 21 |
| PPP1R3C       | ENSG00000119938 | 1889   | down | 10    | -      | 22 |
| EVA1A         | ENSG00000115363 | 862    | down | 2     | -      | 23 |
| CRISPLD2      | ENSG00000103196 | 2516   | down | 16    | +      | 24 |
| RP11-309L24.6 | ENSG00000224163 | 6288   | down | 7     | -      | 25 |
| ZNF385D       | ENSG00000151789 | 529    | up   | 3     | -      | 26 |
| FGFRL1        | ENSG00000127418 | 1174   | down | 4     | +      | 27 |
| CKB           | ENSG00000166165 | 2224   | down | 14    | -      | 28 |
| FILIP1L       | ENSG00000168386 | 2028   | down | 3     | -      | 29 |
| GJA1          | ENSG00000152661 | 12333  | up   | 6     | +      | 30 |
| ENC1          | ENSG00000171617 | 1200   | down | 5     | -      | 31 |
| SH2D4A        | ENSG00000104611 | 5544   | down | 8     | +      | 32 |
| ARHGAP23P1    | ENSG00000260781 | 763    | down | 16    | -      | 33 |
| SERTAD1       | ENSG00000197019 | 2018   | down | 19    | -      | 34 |
| FGF13         | ENSG00000129682 | 345    | up   | X     | -      | 35 |
| EHD1          | ENSG00000110047 | 2871   | down | 11    | -      | 36 |
| USP41         | ENSG00000161133 | 155    | up   | 22    | -      | 37 |
| ACSS3         | ENSG00000111058 | 201    | down | 12    | +      | 38 |
| BACE2         | ENSG00000182240 | 2384   | up   | 21    | +      | 39 |
| ADGRL4        | ENSG00000162618 | 524    | up   | 1     | -      | 40 |
| ROBO1         | ENSG00000169855 | 826    | up   | 3     | -      | 41 |
| KCNC4         | ENSG00000116396 | 187    | down | 1     | +      | 42 |

Table 1: Age differential expressed genes

### 3 Gene list

#### 3.1 ATOH8

| Parameter | Value                              |
|-----------|------------------------------------|
| gene_name | ATOH8                              |
| gene_id   | ENSG00000168874                    |
| maxald    | 4308                               |
| old       | down                               |
| seqid     | 2                                  |
| strand    | +                                  |
| start     | 85751344                           |
| end       | 85788066                           |
| descr     | atonal bHLH transcription factor 8 |

Table 2: Gene identification

### Gene expression estimates for Age

### Influence of UV exposition on gene expression

Figure 1: Gene expression estimates based on CPM (SummarizeOverlaps)  
Age related expression of ATOH8

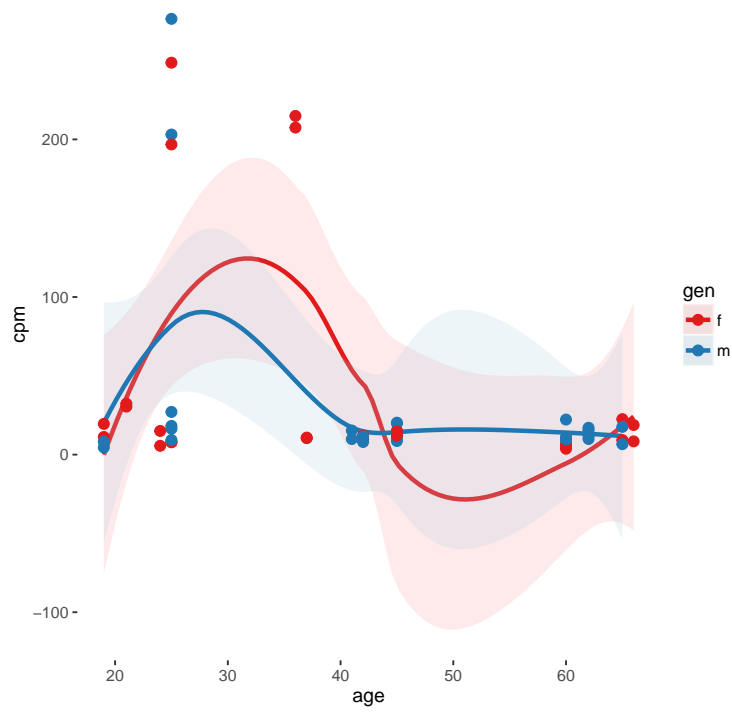

Figure 2: edgeR QLF test based CPM estimates  
Age related expression of ATOH8

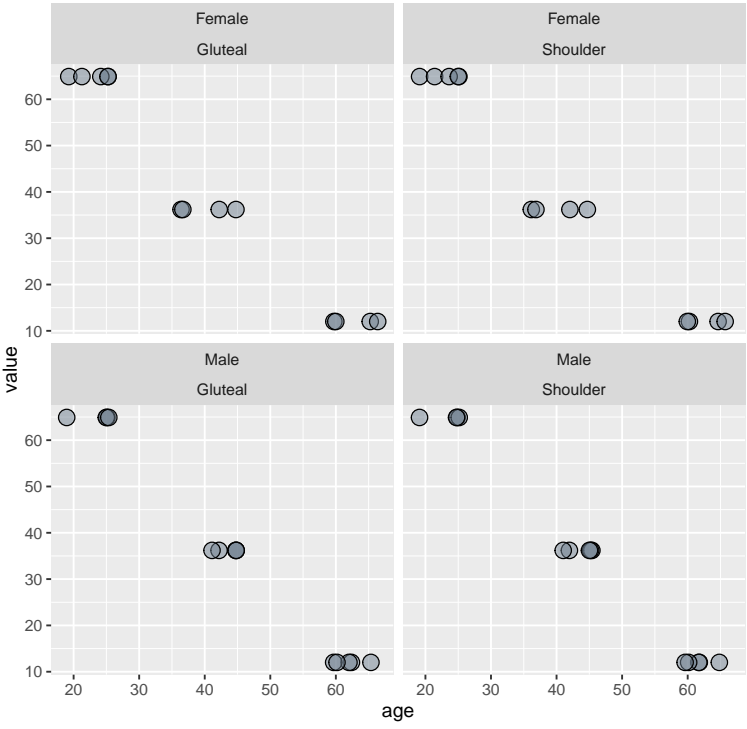

Figure 3: ReadExpSet based genewise CPM estimates  
Age related expression of ATOH8

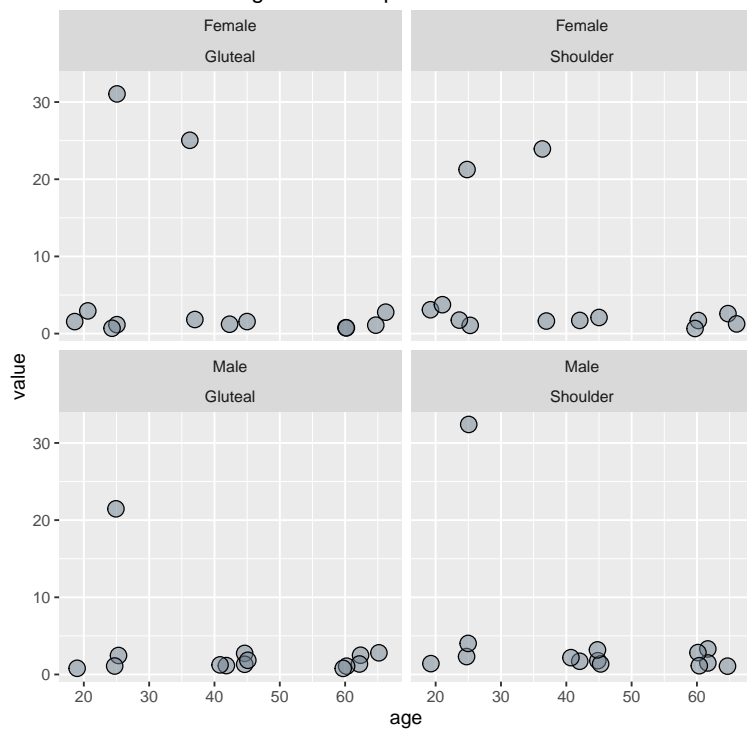

Figure 4: Loess regression for exon align depth

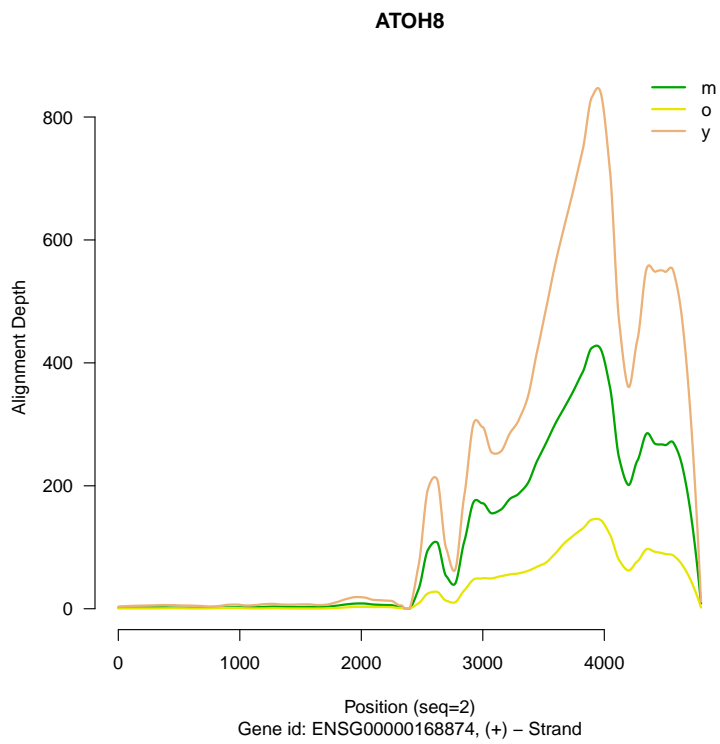



Figure 5: edgeR QLF test based CPM estimates

**Fitted read count values for gene ATOH8**

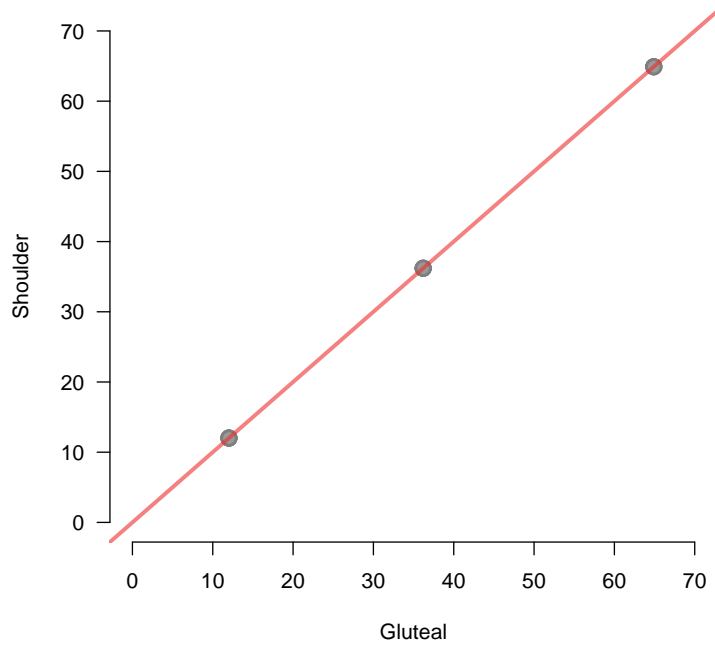

Figure 6: ReadExpSet based genewise CPM estimates

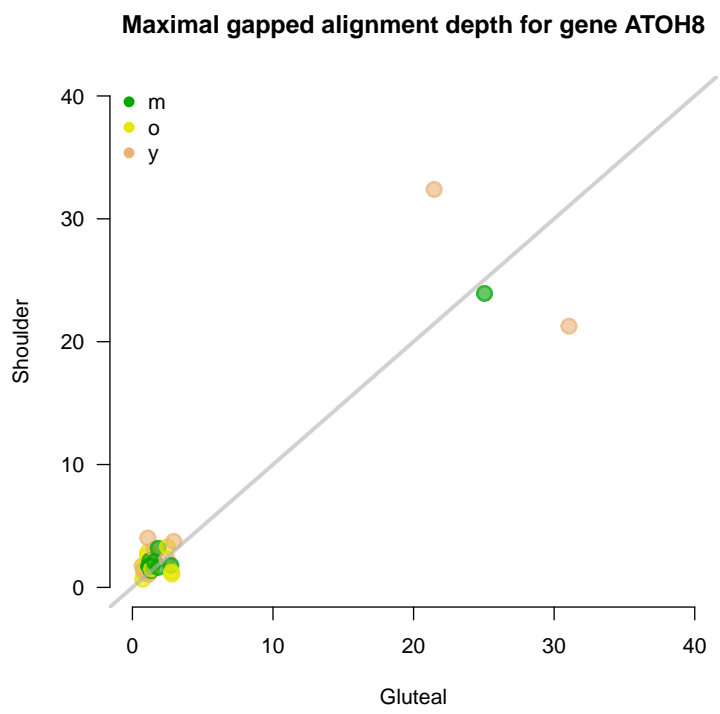

## 3.2 PODXL

| Parameter | Value            |
|-----------|------------------|
| gene_name | PODXL            |
| gene_id   | ENSG00000128567  |
| maxald    | 3927             |
| old       | down             |
| seqid     | 7                |
| strand    | -                |
| start     | 131500262        |
| end       | 131558217        |
| descr     | podocalyxin-like |

Table 3: Gene identification

**Gene expression estimates for Age**

**Influence of UV exposition on gene expression**

Figure 7: Gene expression estimates based on CPM (SummarizeOverlaps)  
Age related expression of PODXL

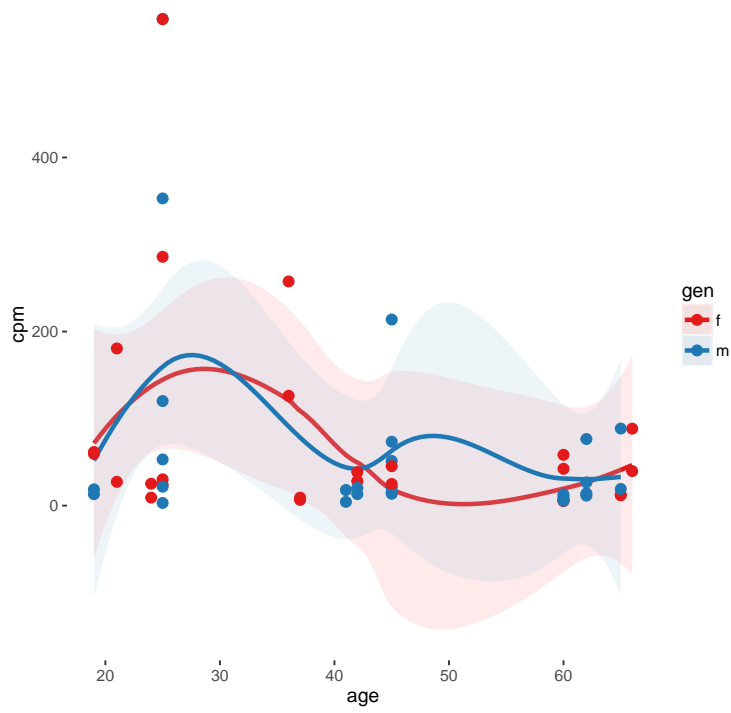

Figure 8: edgeR QLF test based CPM estimates  
Age related expression of PODXL

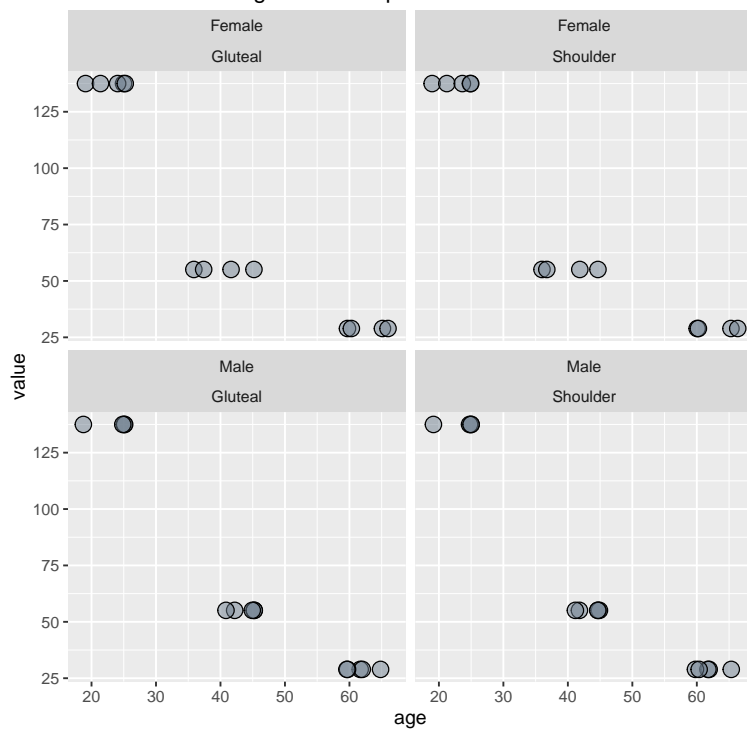

Figure 9: ReadExpSet based genewise CPM estimates  
Age related expression of PODXL

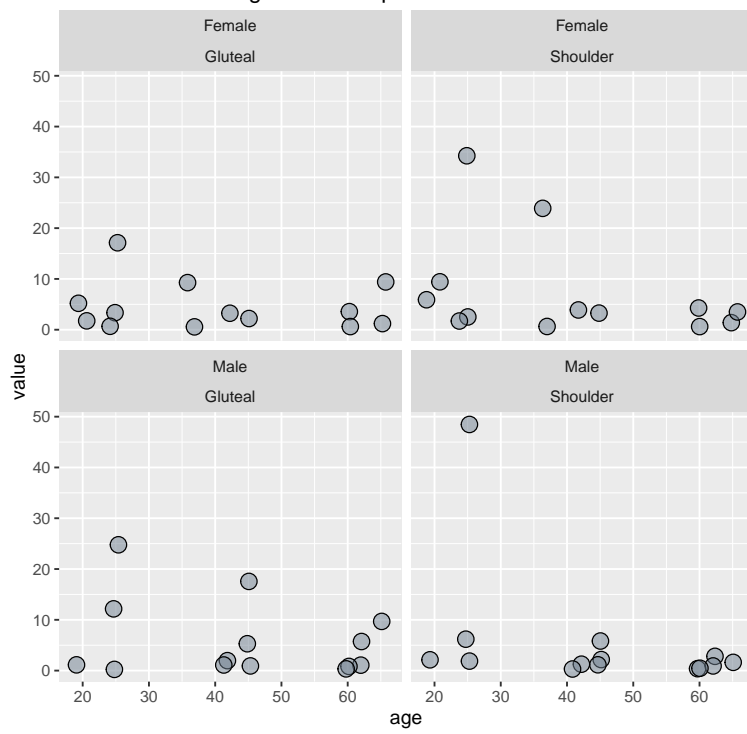

Figure 10: Loess regression for exon align depth

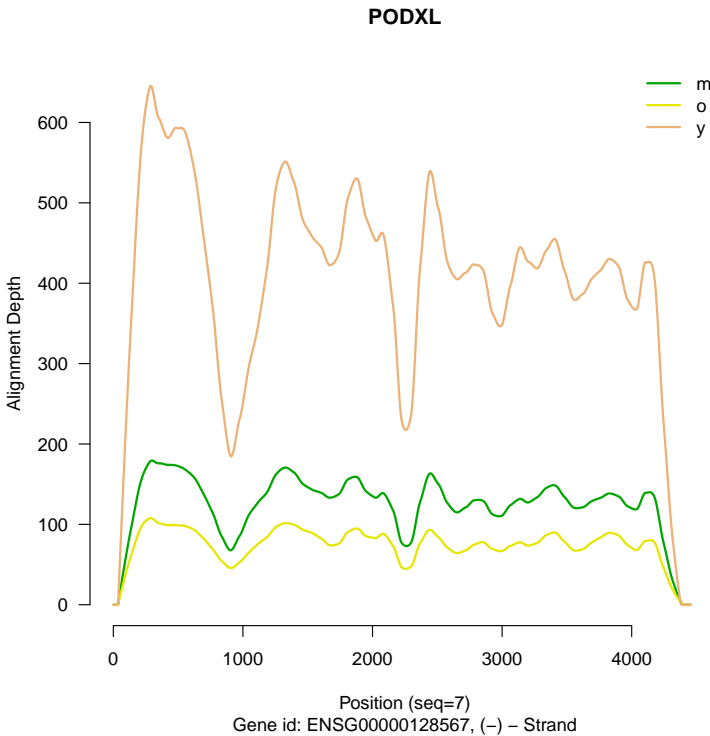

Figure 11: edgeR QLF test based CPM estimates

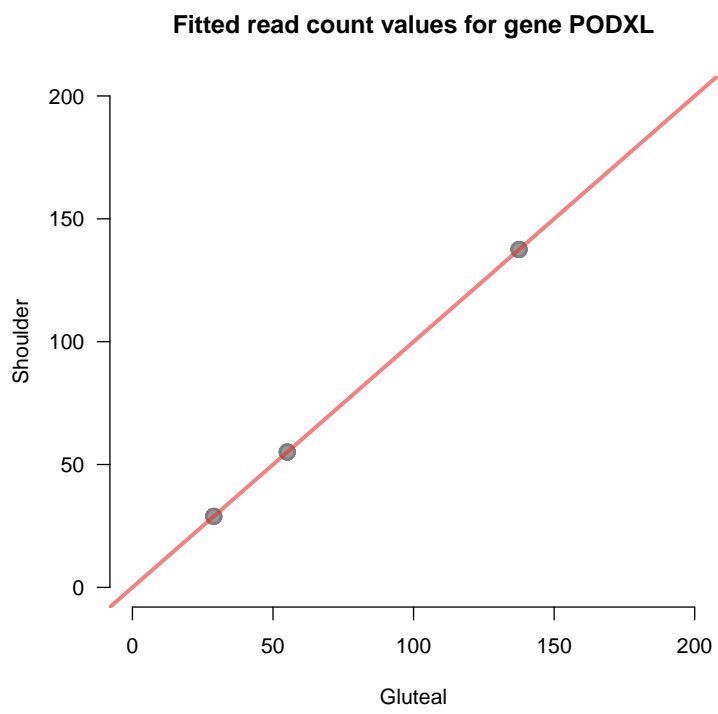



Figure 12: ReadExpSet based genewise CPM estimates

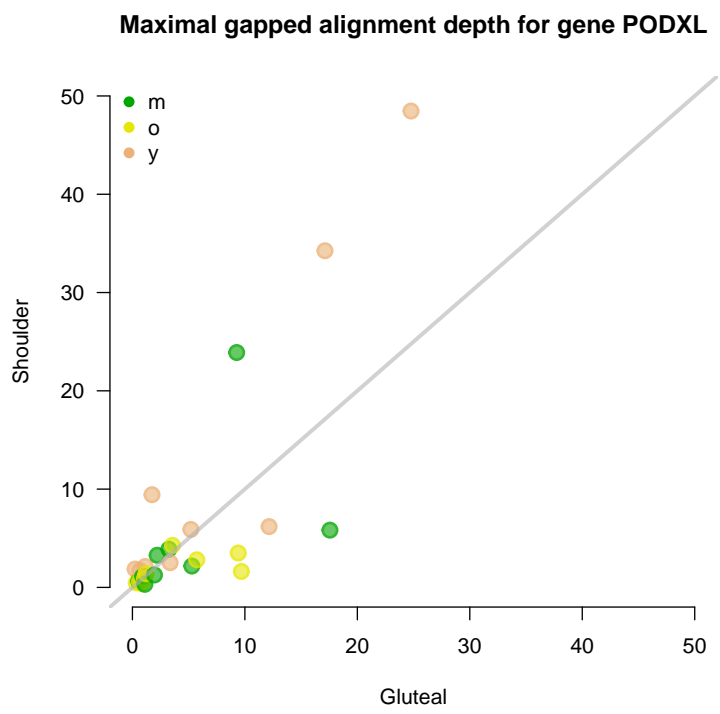

### 3.3 SNAI1

| Parameter | Value                      |
|-----------|----------------------------|
| gene_name | SNAI1                      |
| gene_id   | ENSG00000124216            |
| maxald    | 4575                       |
| old       | down                       |
| seqid     | 20                         |
| strand    | +                          |
| start     | 49982999                   |
| end       | 49988886                   |
| descr     | snail family zinc finger 1 |

Table 4: Gene identification

**Gene expression estimates for Age**

**Influence of UV exposition on gene expression**

Figure 13: Gene expression estimates based on CPM (SummarizeOveraps)  
Age related expression of SNAI1

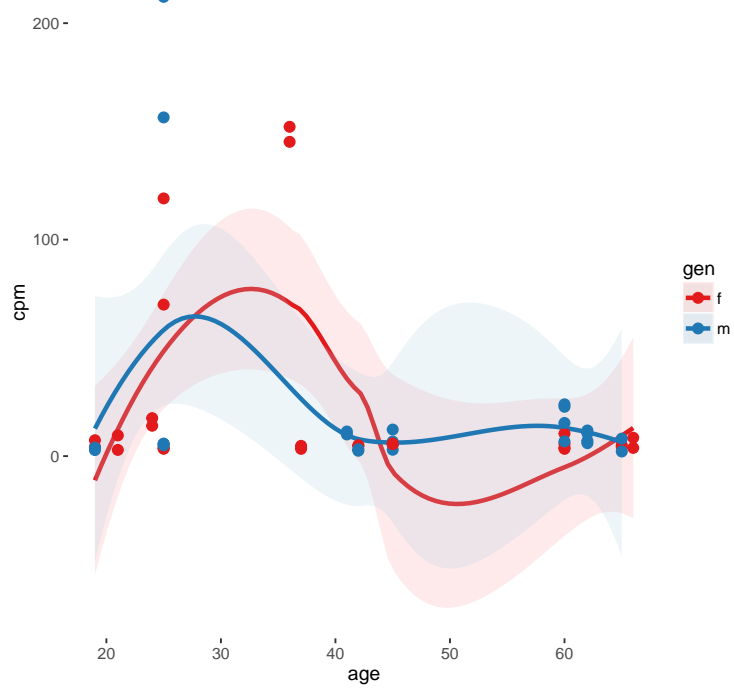

Figure 14: edgeR QLF test based CPM estimates  
Age related expression of SNAI1

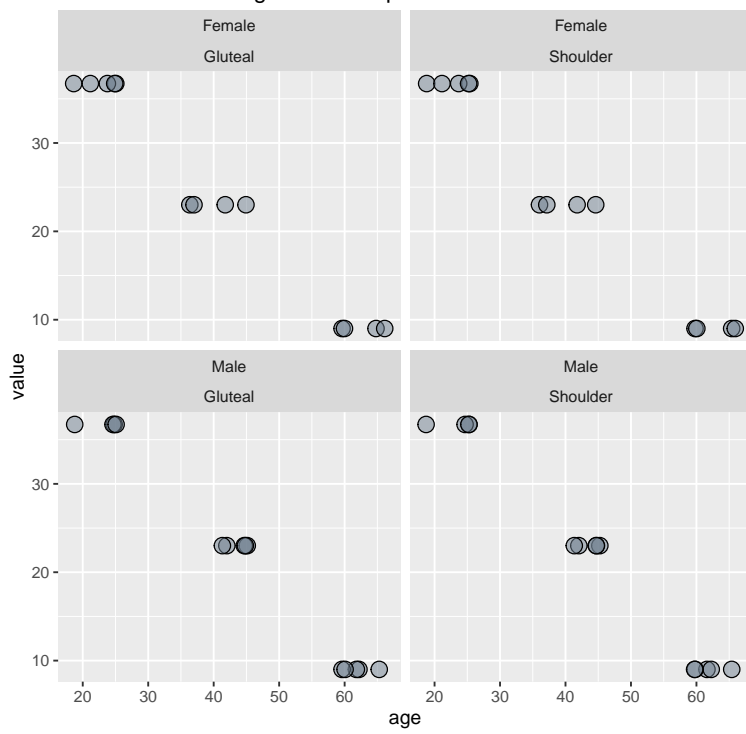

Figure 15: ReadExpSet based genewise CPM estimates  
Age related expression of SNAI1

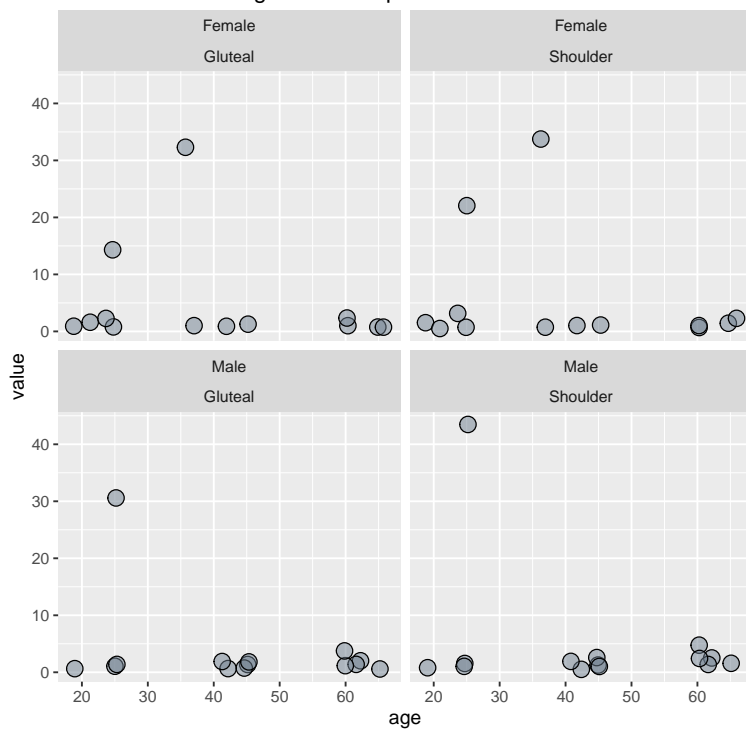

Figure 16: Loess regression for exon align depth

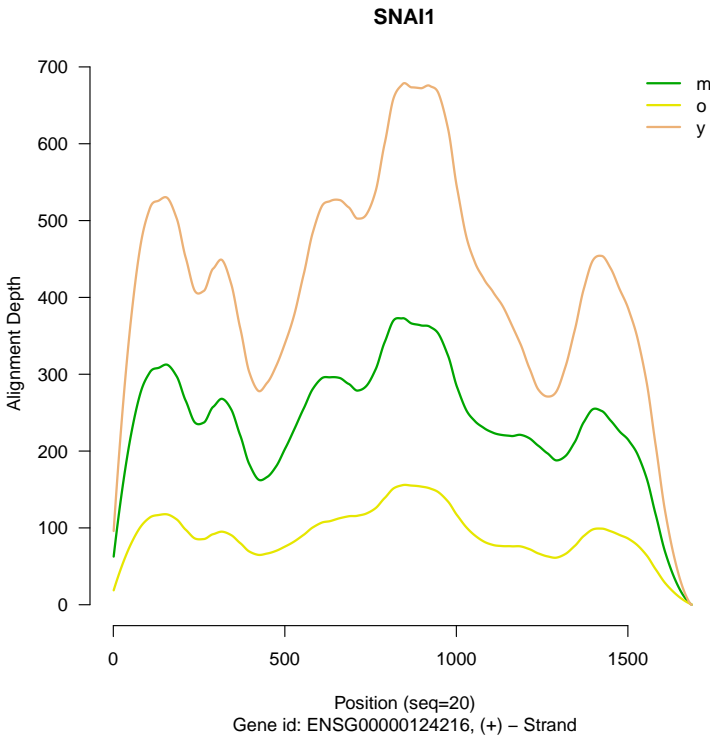

Figure 17: edgeR QLF test based CPM estimates

**Fitted read count values for gene SNAI1**

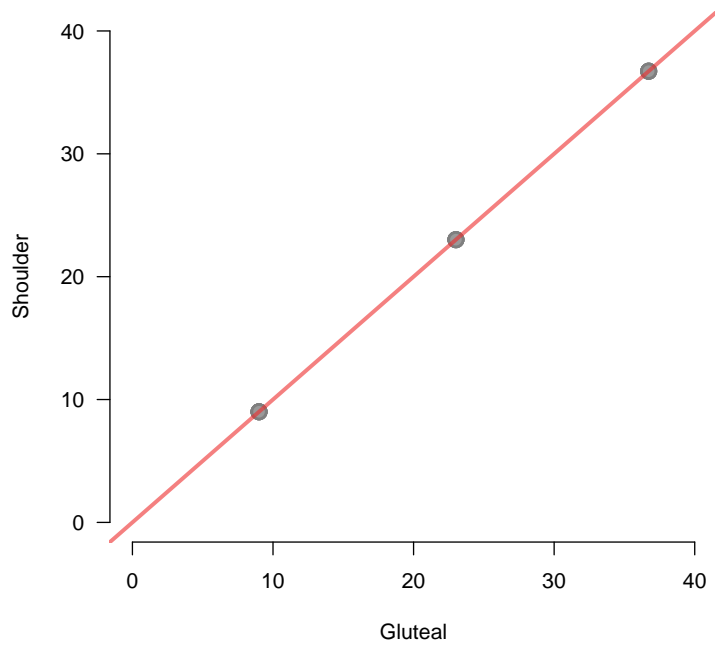

Figure 18: ReadExpSet based genewise CPM estimates

**Maximal gapped alignment depth for gene SNAI1**

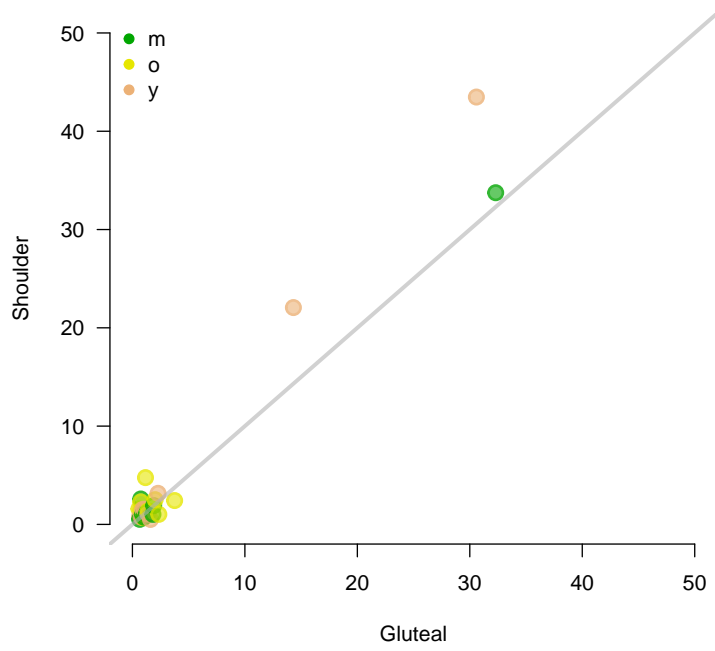



### 3.4 ID3

| Parameter | Value                                                                  |
|-----------|------------------------------------------------------------------------|
| gene_name | ID3                                                                    |
| gene_id   | ENSG00000117318                                                        |
| maxald    | 19530                                                                  |
| old       | down                                                                   |
| seqid     | 1                                                                      |
| strand    | -                                                                      |
| start     | 23557918                                                               |
| end       | 23559794                                                               |
| descr     | inhibitor of DNA binding 3, dominant negative helix-loop-helix protein |

Table 5: Gene identification

#### Gene expression estimates for Age

#### Influence of UV exposition on gene expression

Figure 19: Gene expression estimates based on CPM (SummarizeOveraps)  
Age related expression of ID3

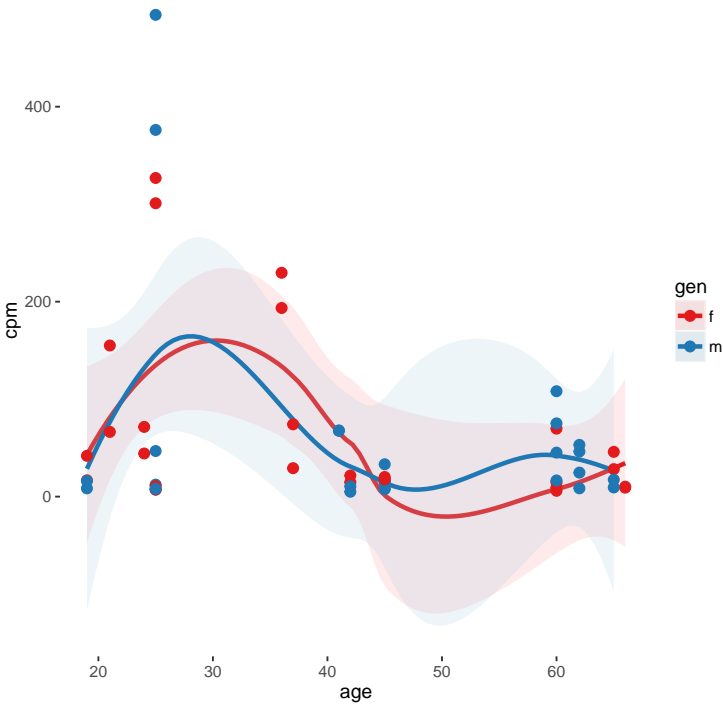

Figure 20: edgeR QLF test based CPM estimates  
Age related expression of ID3

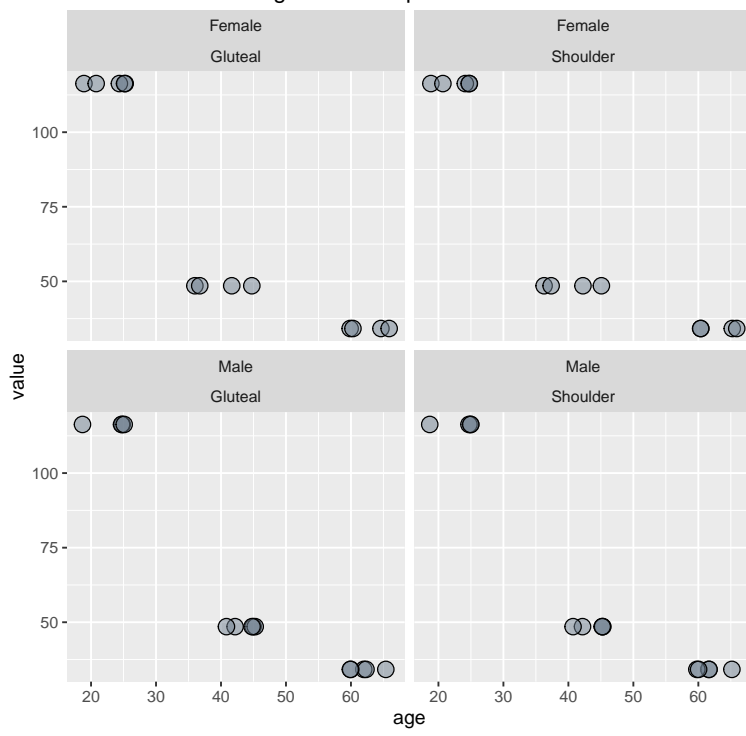

Figure 21: ReadExpSet based genewise CPM estimates  
Age related expression of ID3

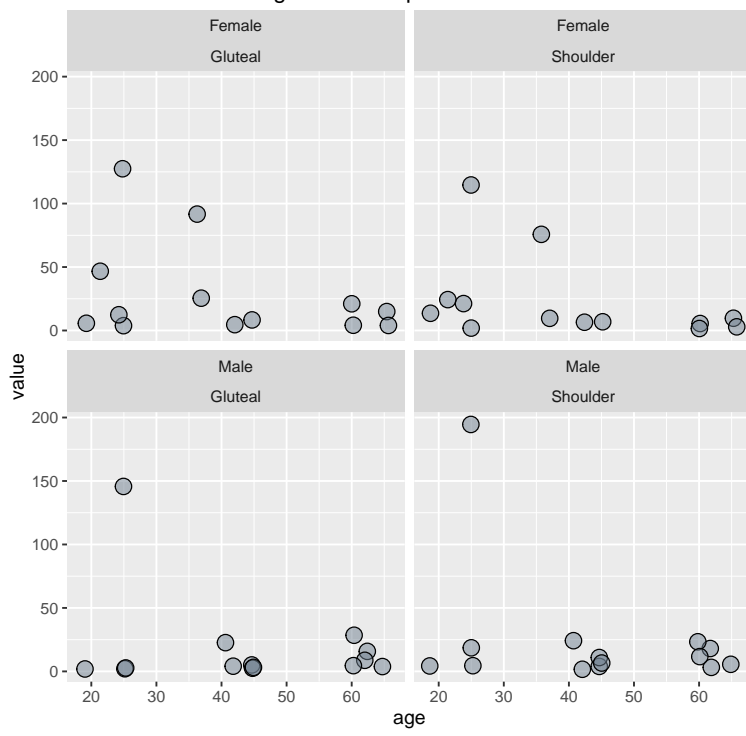

Figure 22: Loess regression for exon align depth

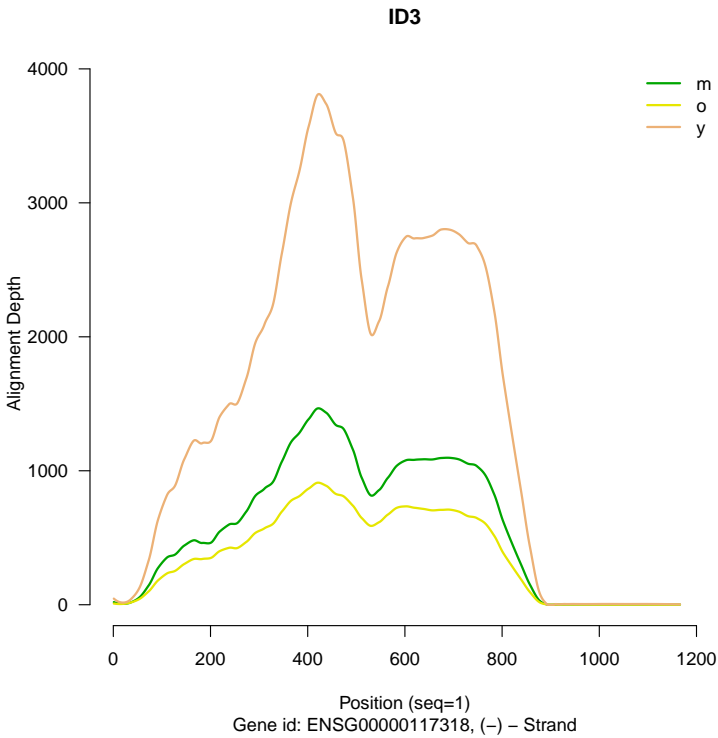

Figure 23: edgeR QLF test based CPM estimates

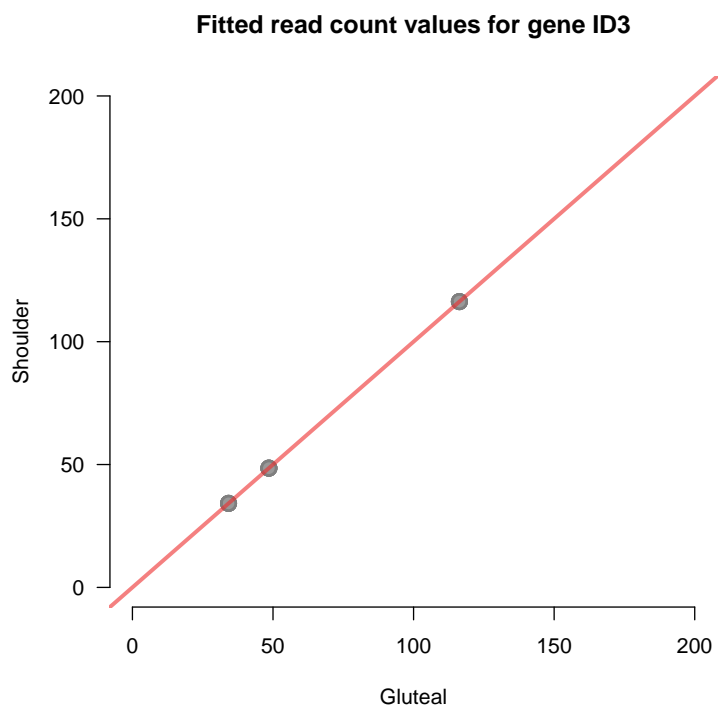

Figure 24: ReadExpSet based genewise CPM estimates

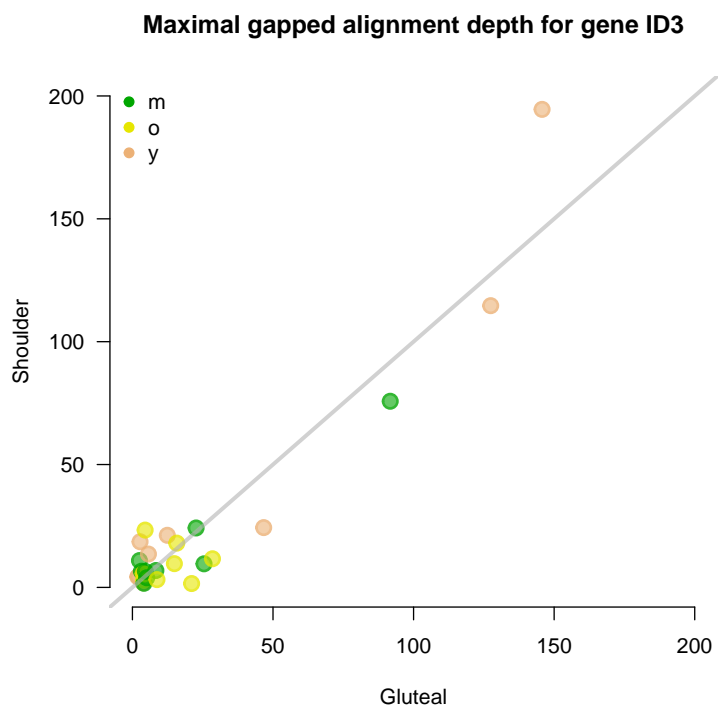

### 3.5 SPHK1

| Parameter | Value                |
|-----------|----------------------|
| gene_name | SPHK1                |
| gene_id   | ENSG00000176170      |
| maxald    | 6585                 |
| old       | down                 |
| seqid     | 17                   |
| strand    | +                    |
| start     | 76376584             |
| end       | 76387860             |
| descr     | sphingosine kinase 1 |

Table 6: Gene identification

**Gene expression estimates for Age**

**Influence of UV exposition on gene expression**



Figure 25: Gene expression estimates based on CPM (SummarizeOveraps)

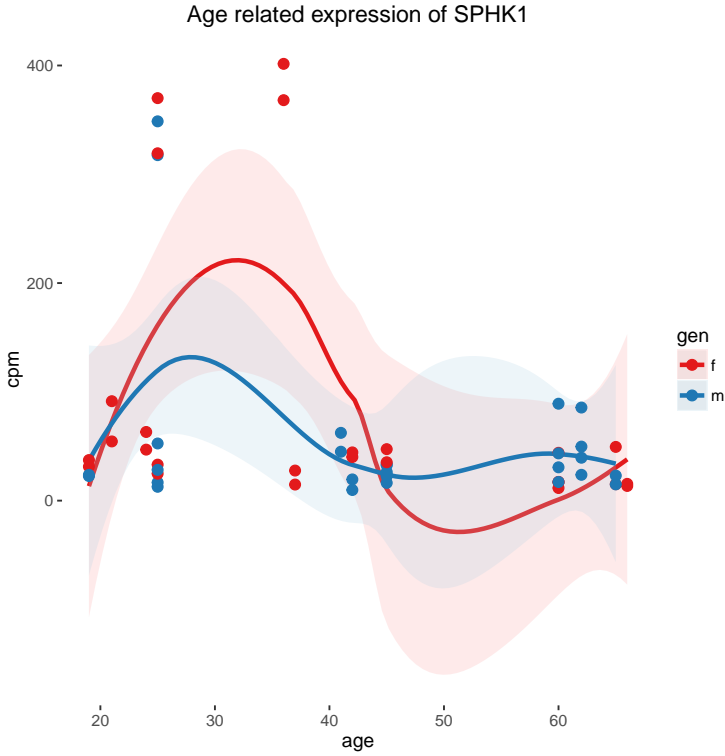

Figure 26: edgeR QLF test based CPM estimates  
Age related expression of SPHK1

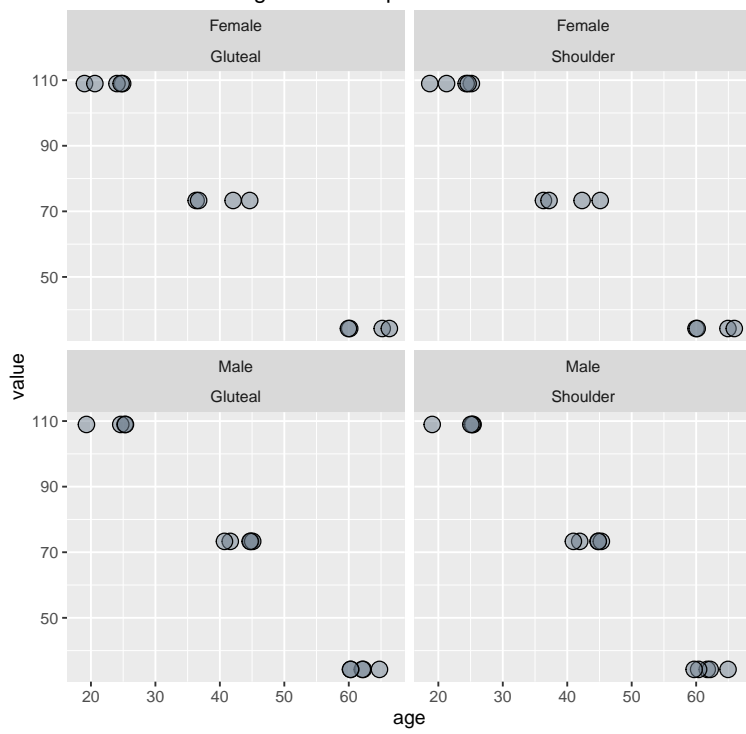

Figure 27: ReadExpSet based genewise CPM estimates  
Age related expression of SPHK1

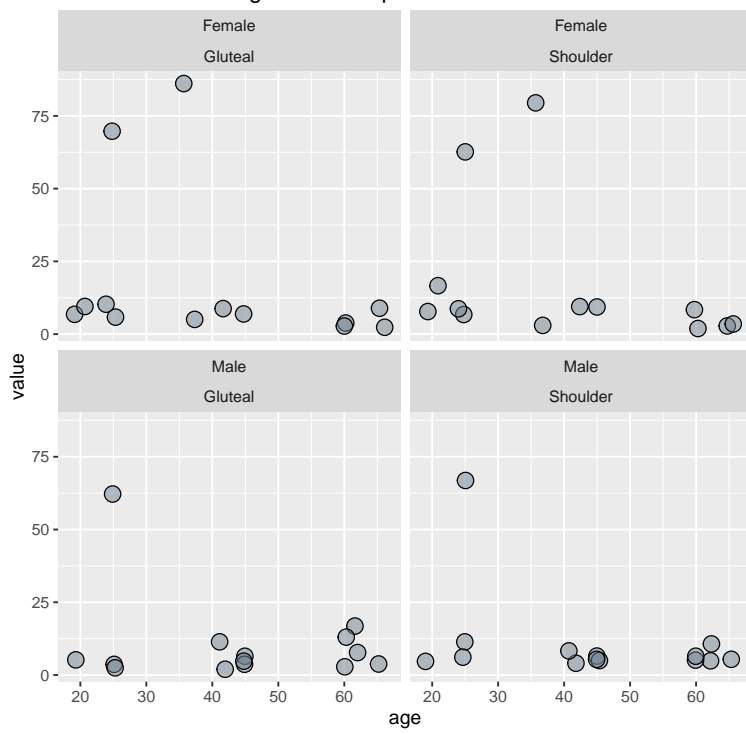

Figure 28: Loess regression for exon align depth

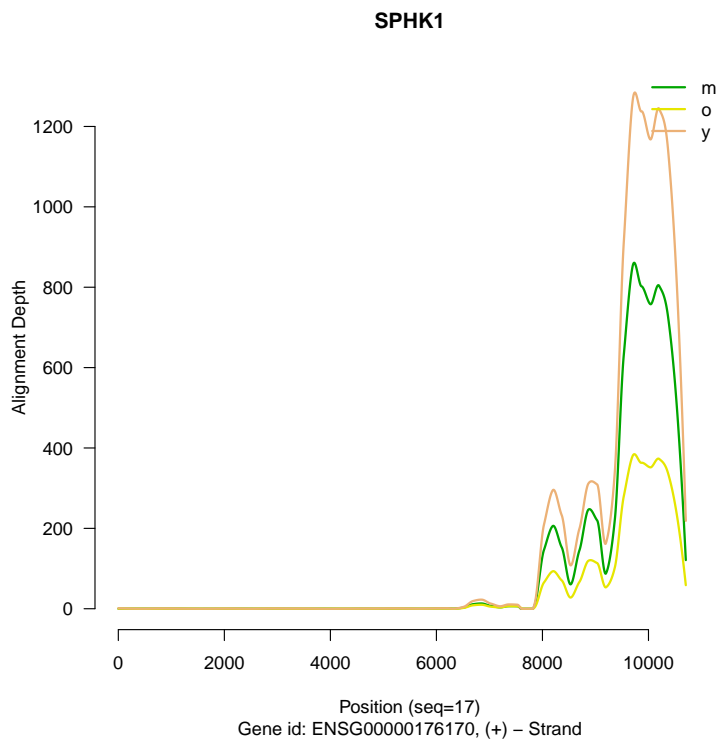

Figure 29: edgeR QLF test based CPM estimates

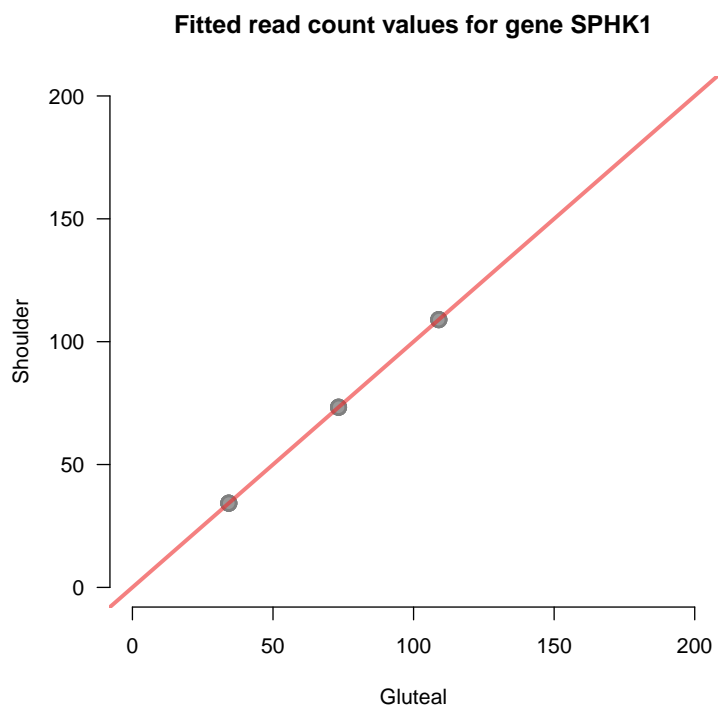

Figure 30: ReadExpSet based genewise CPM estimates

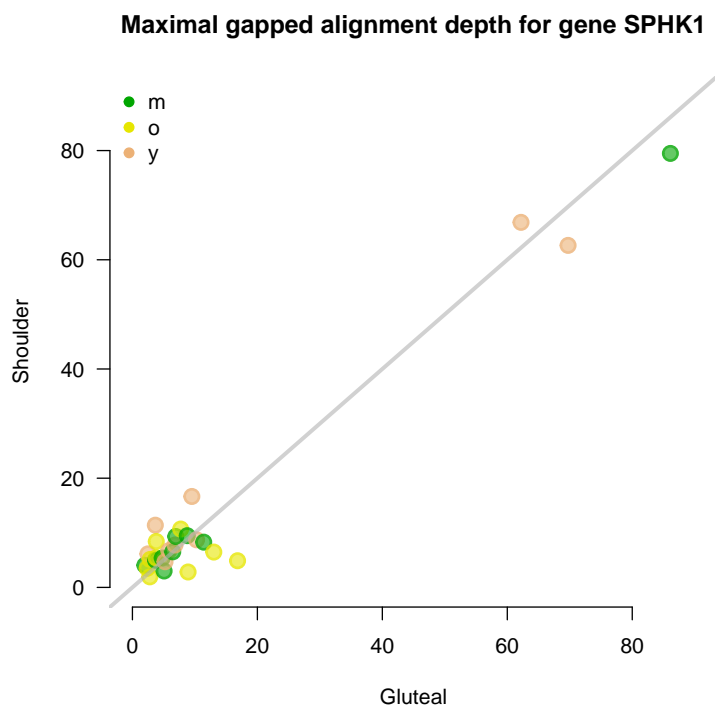

### 3.6 ID1

| Parameter | Value                                                                  |
|-----------|------------------------------------------------------------------------|
| gene_name | ID1                                                                    |
| gene_id   | ENSG00000125968                                                        |
| maxald    | 14913                                                                  |
| old       | down                                                                   |
| seqid     | 20                                                                     |
| strand    | +                                                                      |
| start     | 31605283                                                               |
| end       | 31606515                                                               |
| descr     | inhibitor of DNA binding 1, dominant negative helix-loop-helix protein |

Table 7: Gene identification

#### Gene expression estimates for Age

#### Influence of UV exposition on gene expression

Figure 31: Gene expression estimates based on CPM (SummarizeOveraps)

Age related expression of ID1

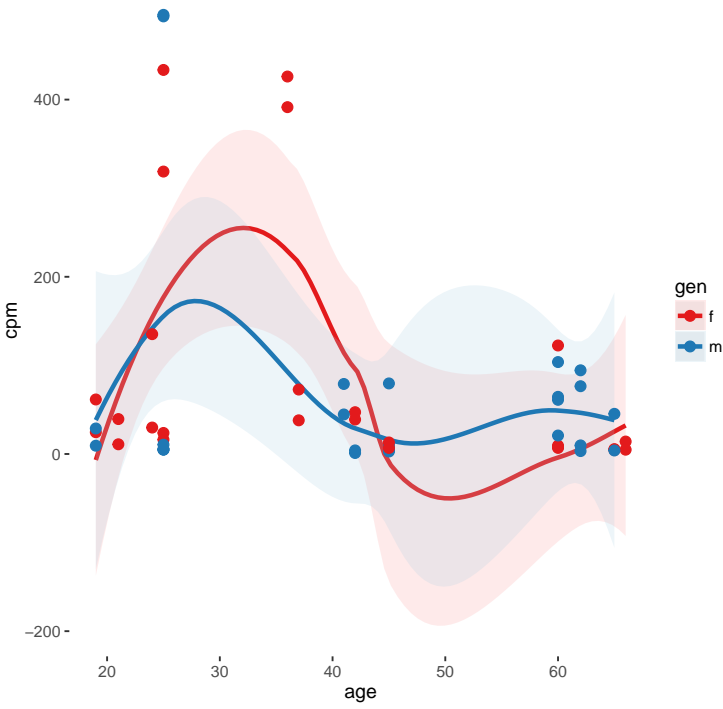



Figure 32: edgeR QLF test based CPM estimates  
Age related expression of ID1

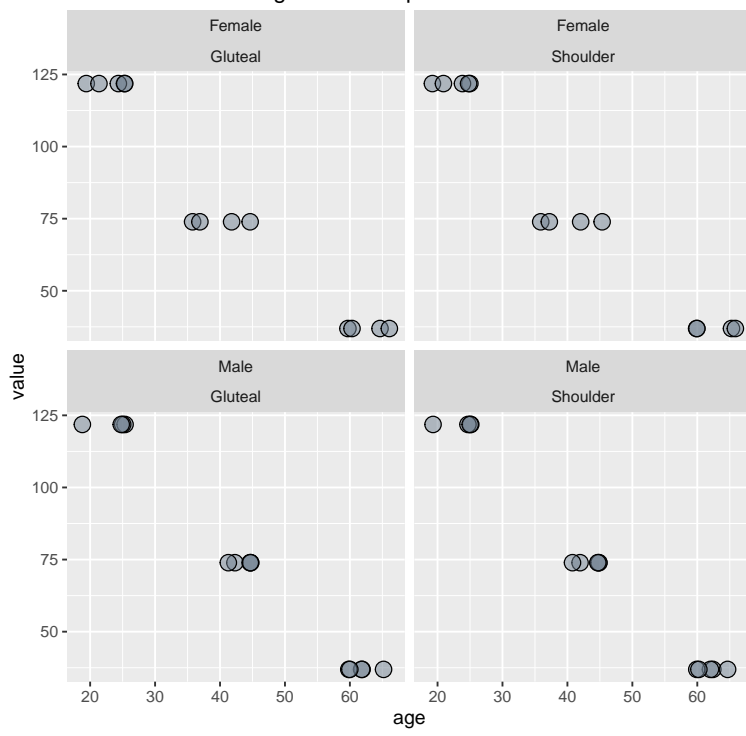

Figure 33: ReadExpSet based genewise CPM estimates  
Age related expression of ID1

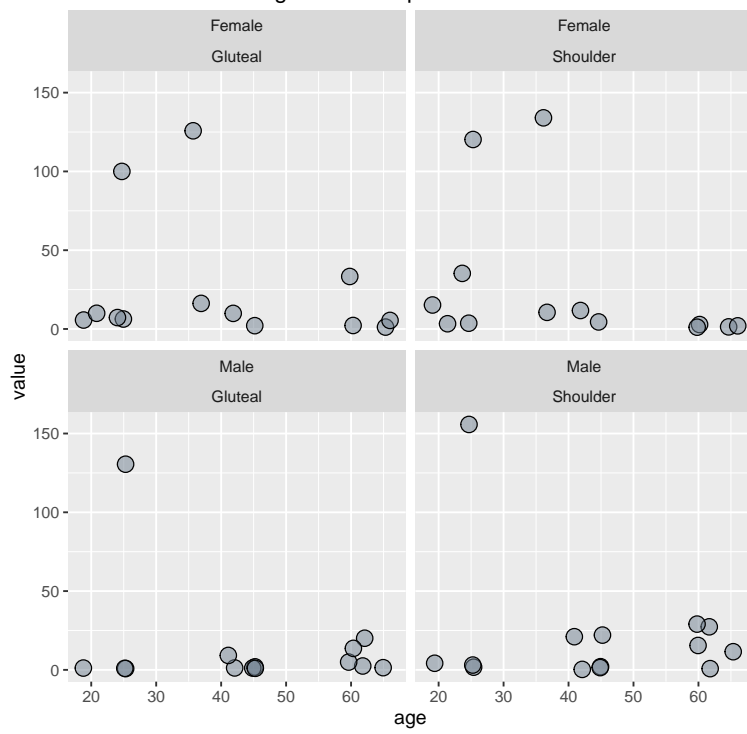

Figure 34: Loess regression for exon align depth

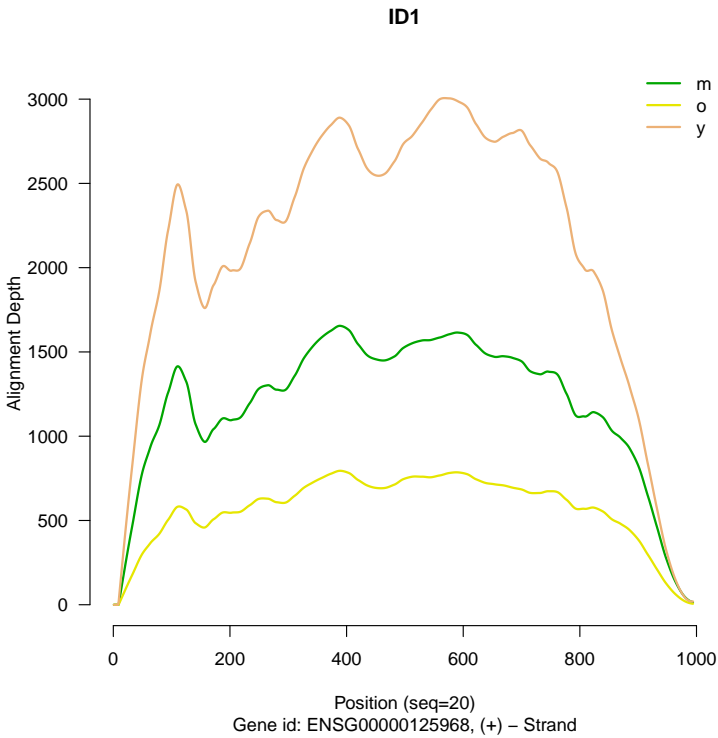

Figure 35: edgeR QLF test based CPM estimates

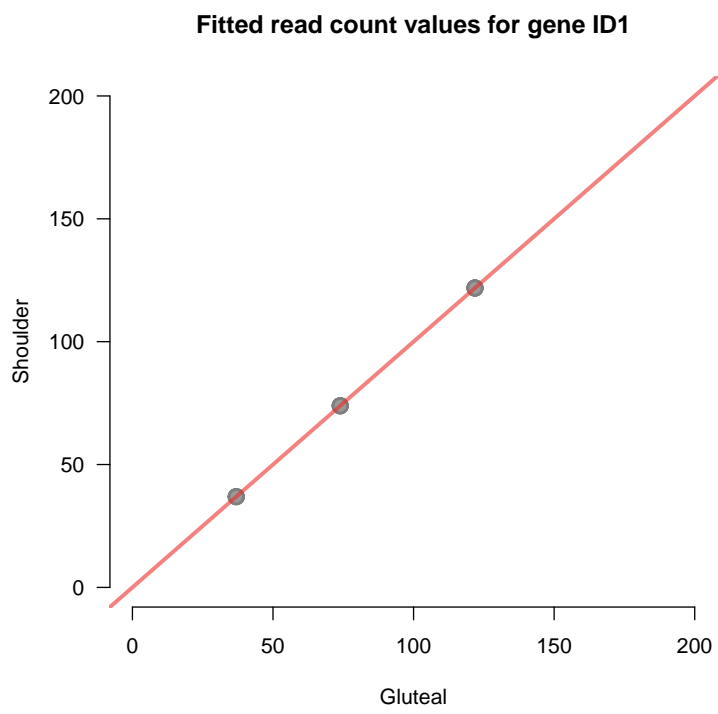

Figure 36: ReadExpSet based genewise CPM estimates

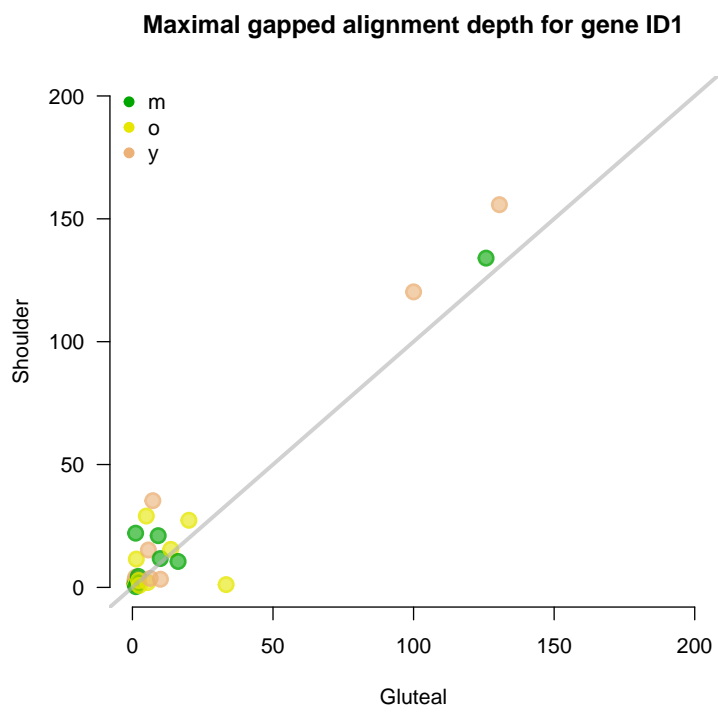

### 3.7 ERRFI1

| Parameter | Value                              |
|-----------|------------------------------------|
| gene_name | ERRFI1                             |
| gene_id   | ENSG00000116285                    |
| maxald    | 1776                               |
| old       | down                               |
| seqid     | 1                                  |
| strand    | -                                  |
| start     | 8004404                            |
| end       | 8026308                            |
| descr     | ERBB receptor feedback inhibitor 1 |

Table 8: Gene identification

**Gene expression estimates for Age**

**Influence of UV exposition on gene expression**

Figure 37: Gene expression estimates based on CPM (SummarizeOveraps)  
Age related expression of ERRF1

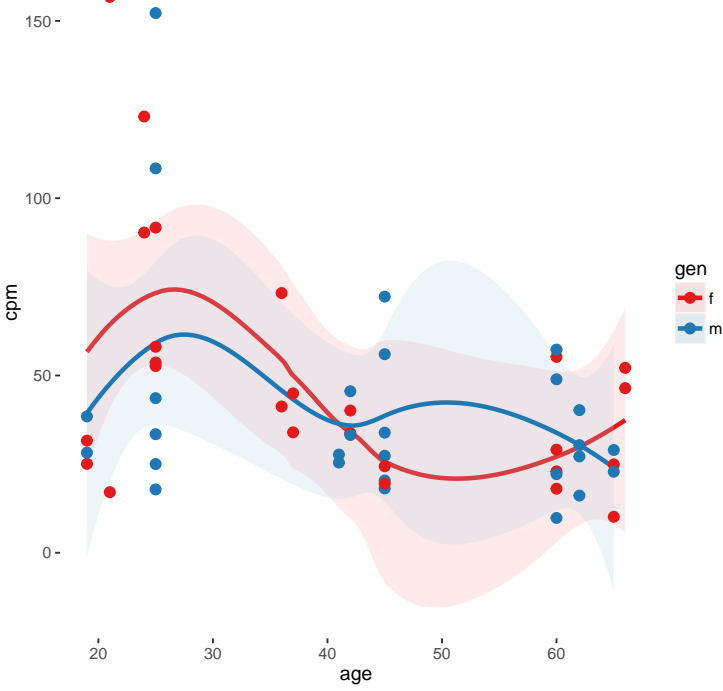

Figure 38: edgeR QLF test based CPM estimates  
Age related expression of ERRF1

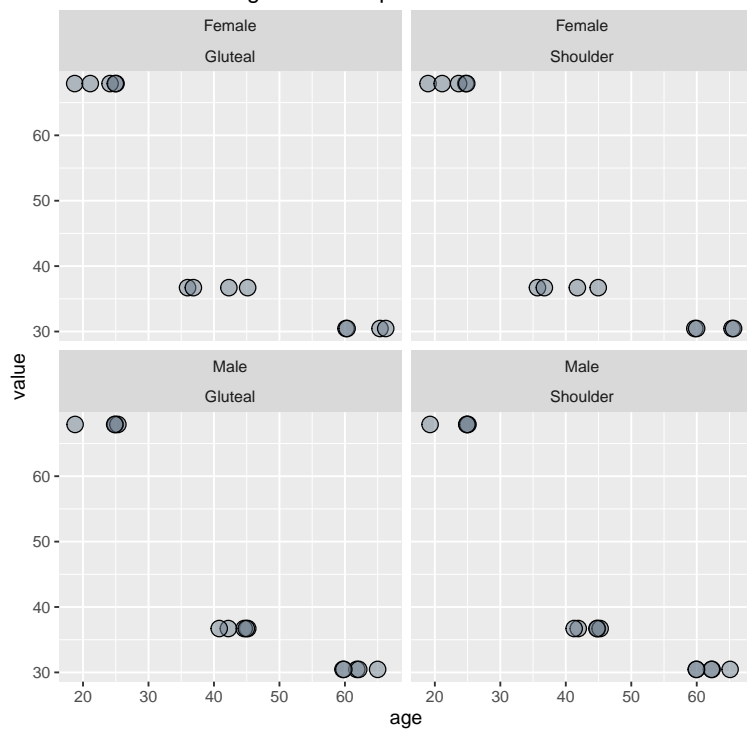



Figure 39: ReadExpSet based genewise CPM estimates  
Age related expression of ERRF1

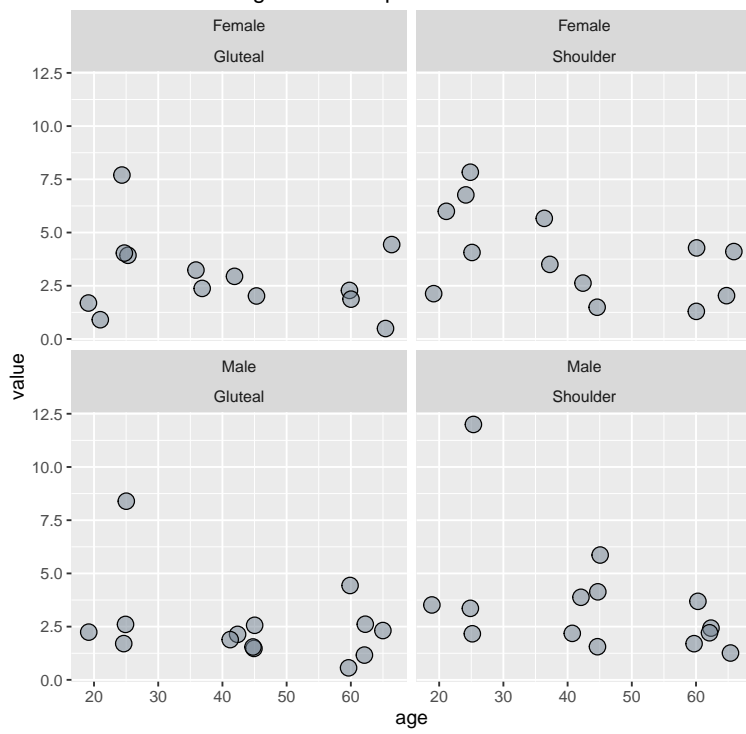

Figure 40: Loess regression for exon align depth

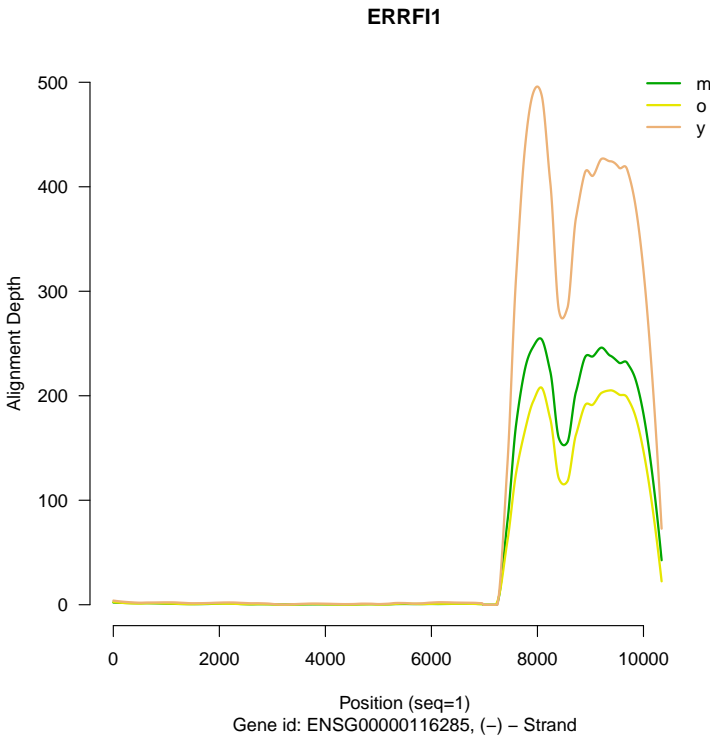

Figure 41: edgeR QLF test based CPM estimates

**Fitted read count values for gene ERRF1**

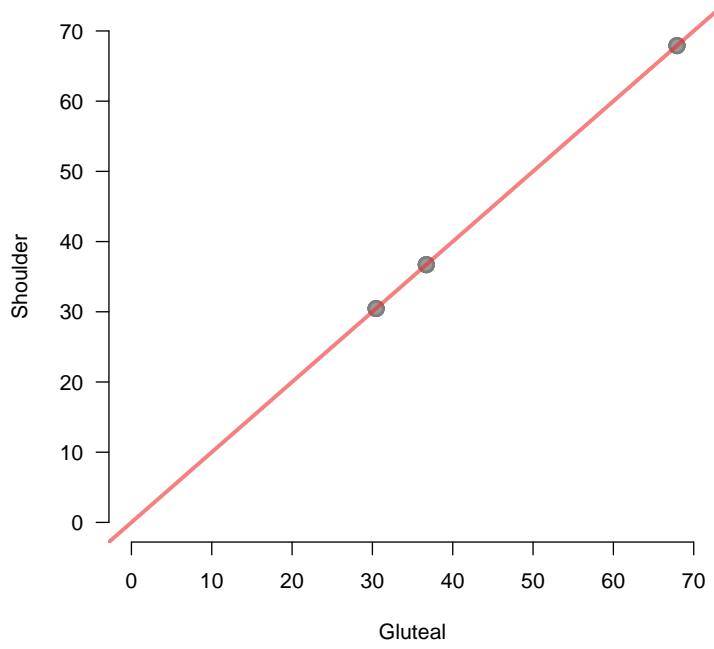

Figure 42: ReadExpSet based genewise CPM estimates

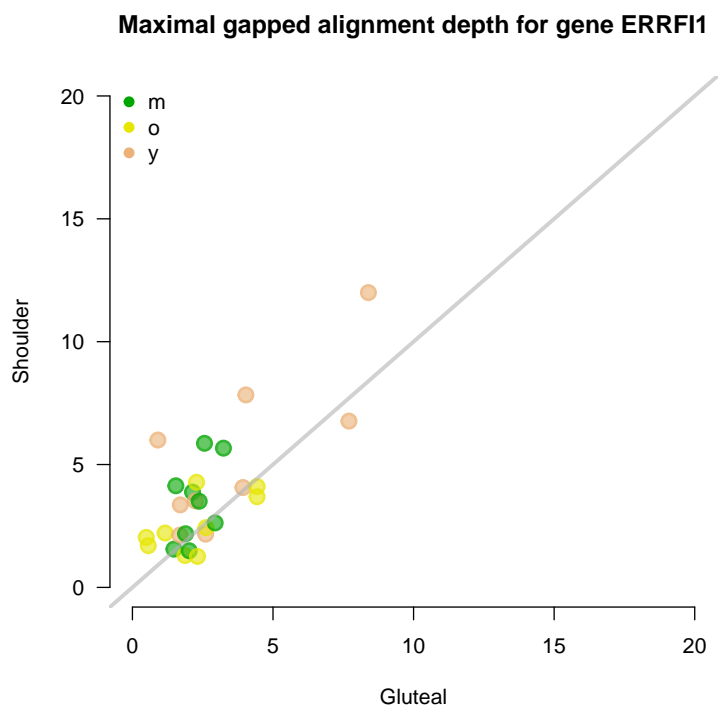

### 3.8 PENK

| Parameter | Value           |
|-----------|-----------------|
| gene_name | PENK            |
| gene_id   | ENSG00000181195 |
| maxald    | 2554            |
| old       | up              |
| seqid     | 8               |
| strand    | -               |
| start     | 56436674        |
| end       | 56446734        |
| descr     | proenkephalin   |

Table 9: Gene identification

**Gene expression estimates for Age**

**Influence of UV exposition on gene expression**

Figure 43: Gene expression estimates based on CPM (SummarizeOveraps)  
Age related expression of PENK

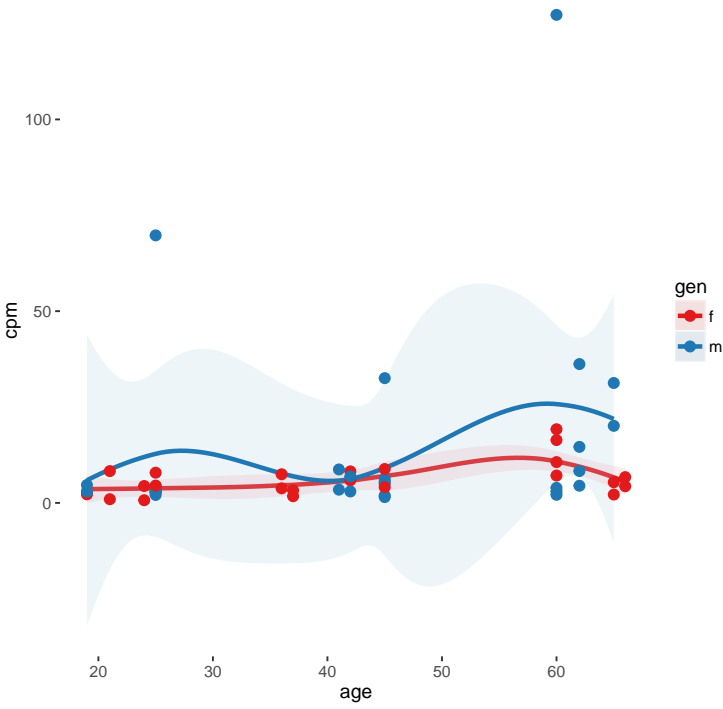

Figure 44: edgeR QLF test based CPM estimates  
Age related expression of PENK

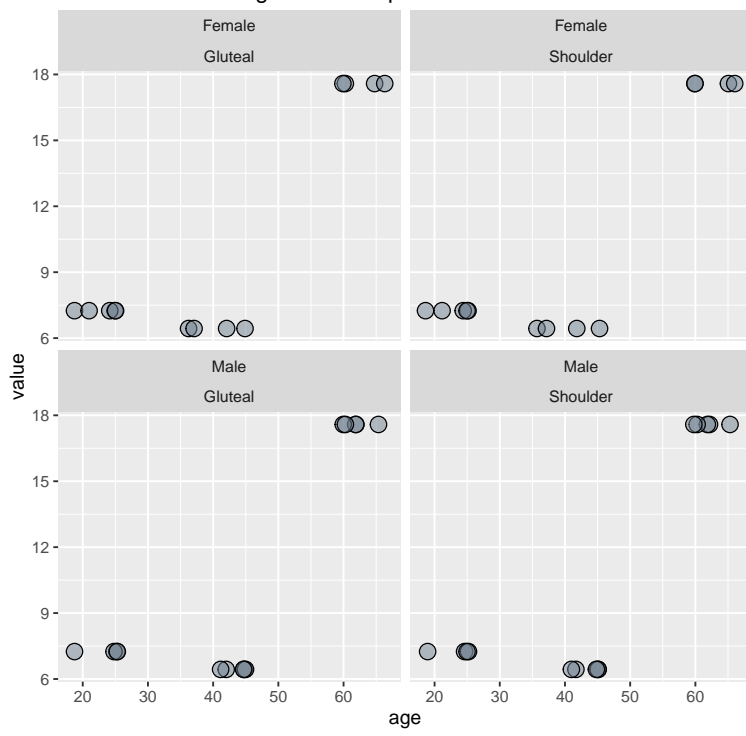

Figure 45: ReadExpSet based genewise CPM estimates  
Age related expression of PENK

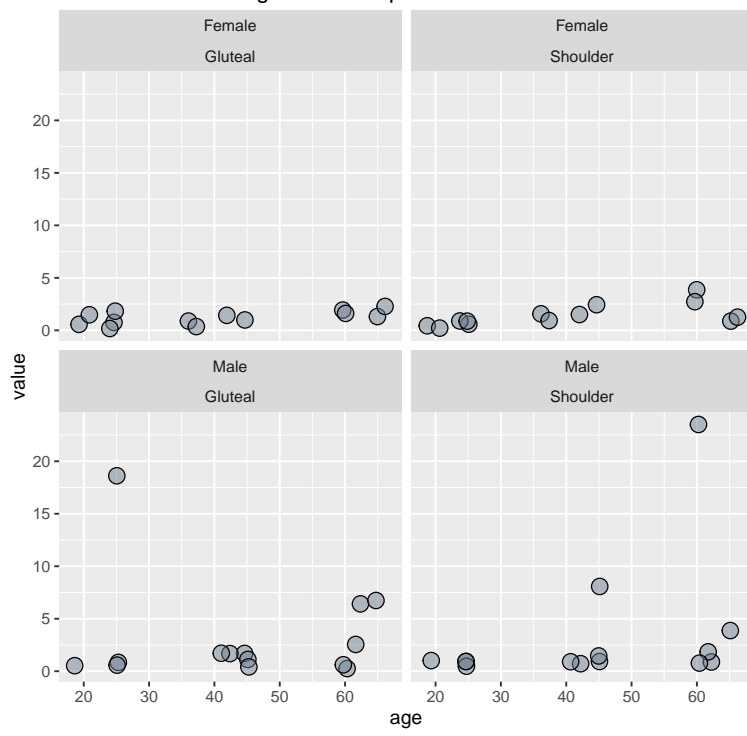



Figure 46: Loess regression for exon align depth

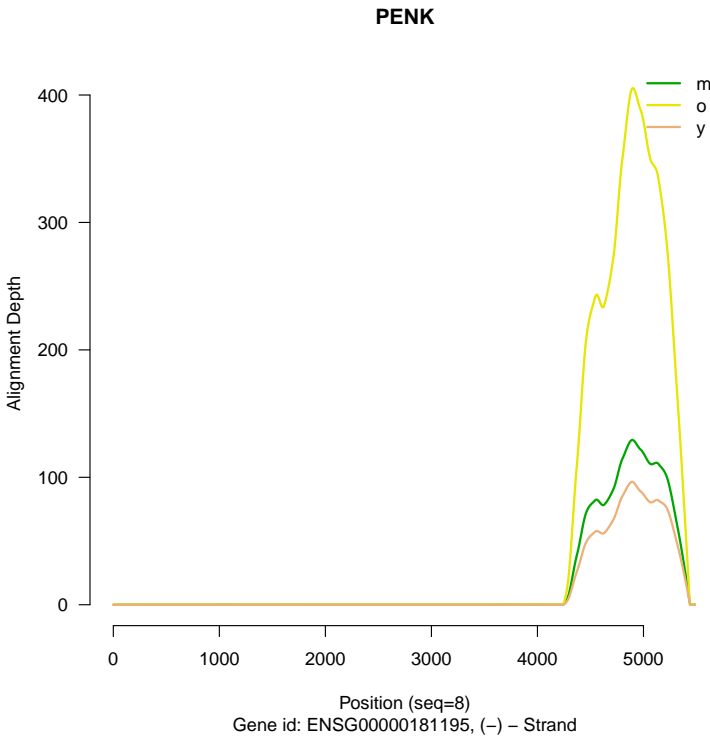

Figure 47: edgeR QLF test based CPM estimates

**Fitted read count values for gene PENK**

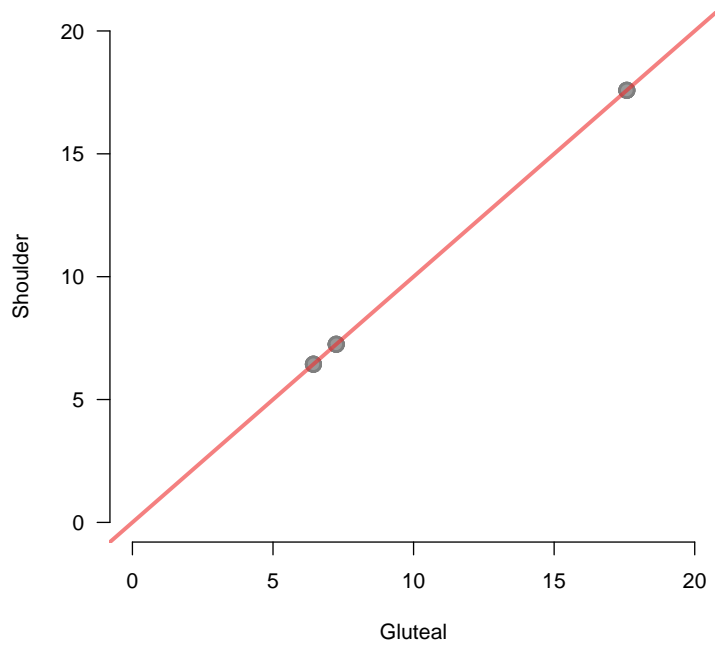

Figure 48: ReadExpSet based genewise CPM estimates

**Maximal gapped alignment depth for gene PENK**

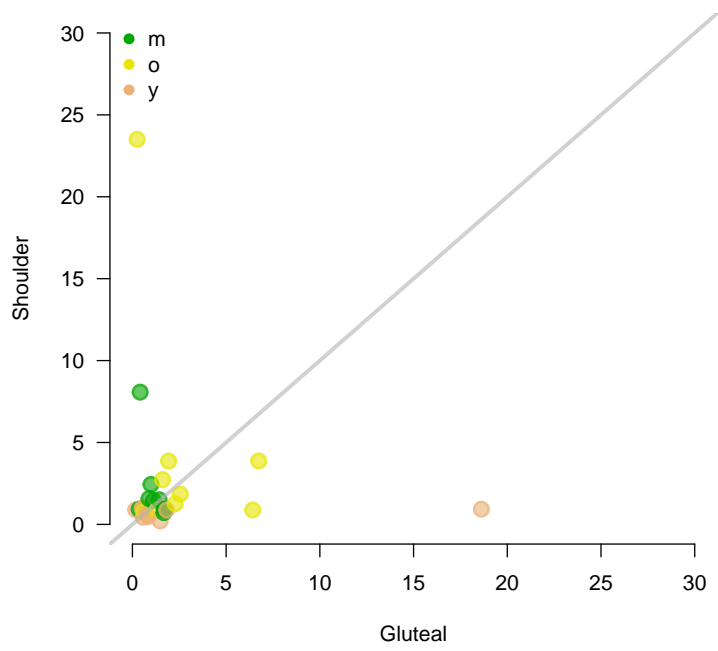

### 3.9 SEPT5

| Parameter | Value           |
|-----------|-----------------|
| gene_name | SEPT5           |
| gene_id   | ENSG00000184702 |
| maxald    | 1468            |
| old       | down            |
| seqid     | 22              |
| strand    | +               |
| start     | 19714464        |
| end       | 19724772        |
| descr     | septin 5        |

Table 10: Gene identification

**Gene expression estimates for Age**

**Influence of UV exposition on gene expression**

Figure 49: Gene expression estimates based on CPM (SummarizeOveraps)  
Age related expression of SEPT5

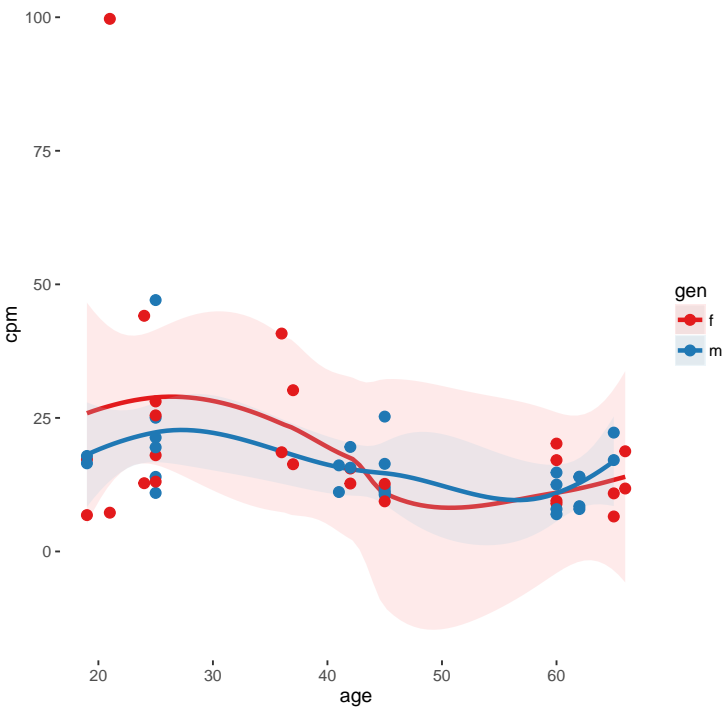

Figure 50: edgeR QLF test based CPM estimates  
Age related expression of SEPT5

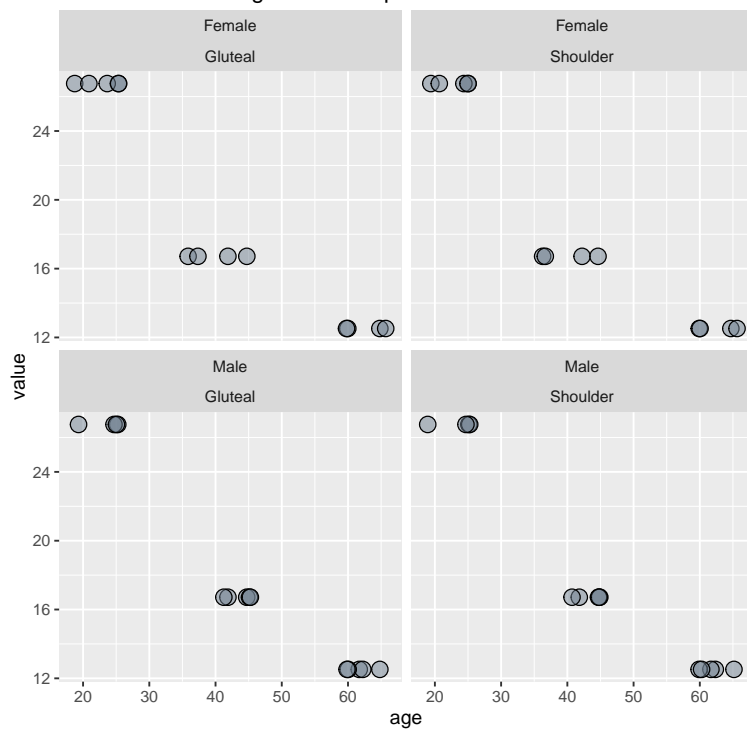

Figure 51: ReadExpSet based genewise CPM estimates  
Age related expression of SEPT5

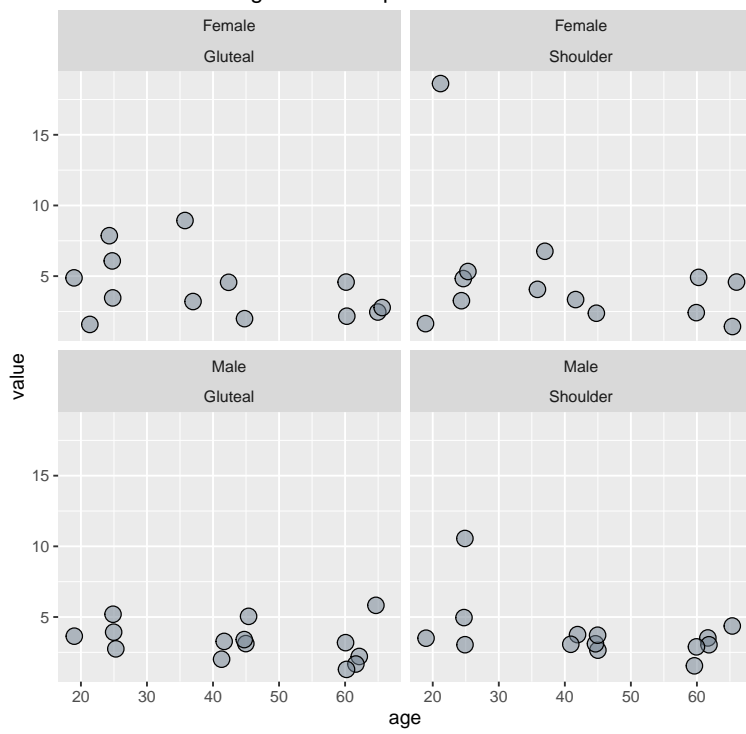

Figure 52: Loess regression for exon align depth

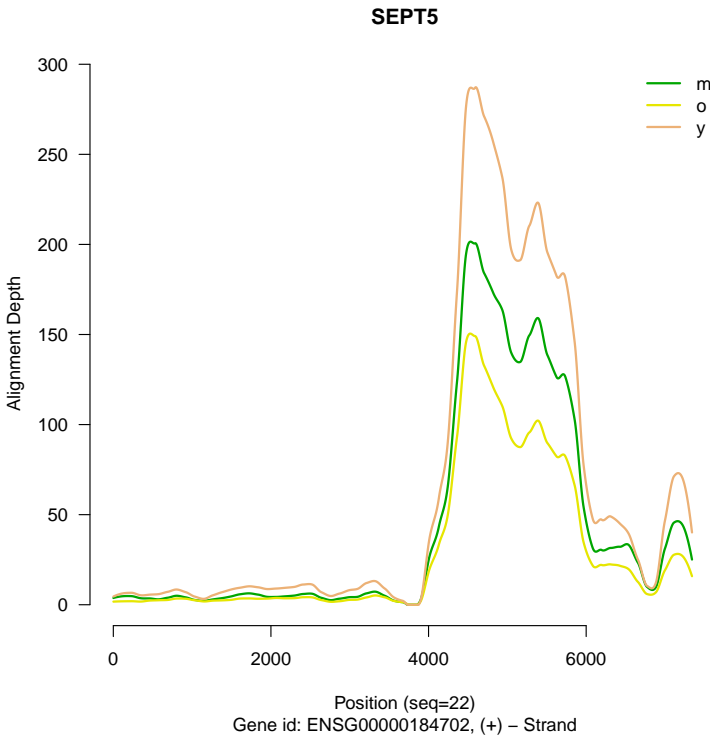



Figure 53: edgeR QLF test based CPM estimates

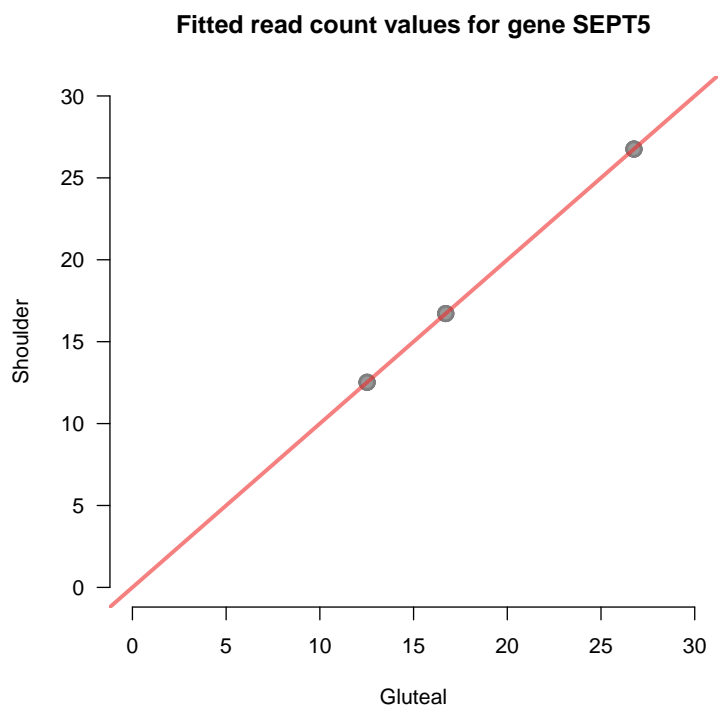

Figure 54: ReadExpSet based genewise CPM estimates

**Maximal gapped alignment depth for gene SEPT5**

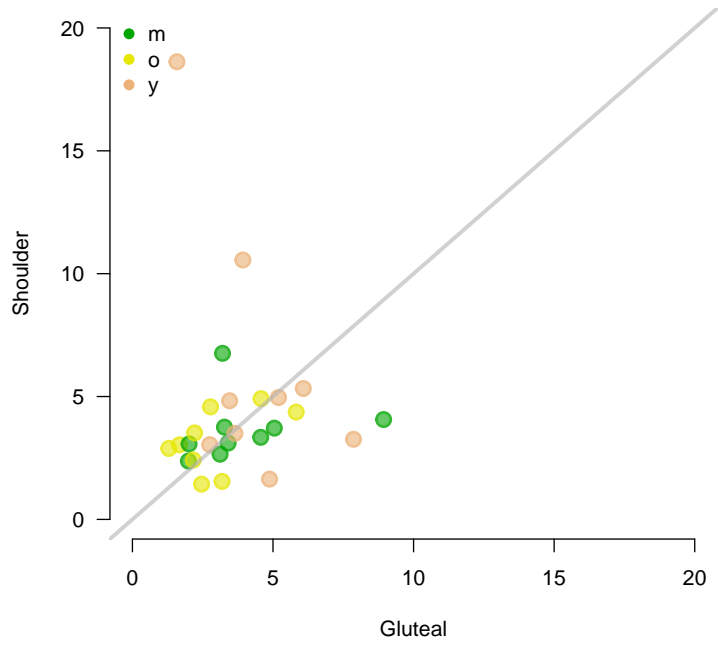

### 3.10 CPZ

| Parameter | Value              |
|-----------|--------------------|
| gene_name | CPZ                |
| gene_id   | ENSG00000109625    |
| maxald    | 2585               |
| old       | up                 |
| seqid     | 4                  |
| strand    | +                  |
| start     | 8592660            |
| end       | 8619759            |
| descr     | carboxypeptidase Z |

Table 11: Gene identification

**Gene expression estimates for Age**

**Influence of UV exposition on gene expression**

Figure 55: Gene expression estimates based on CPM (SummarizeOveraps)  
Age related expression of CPZ

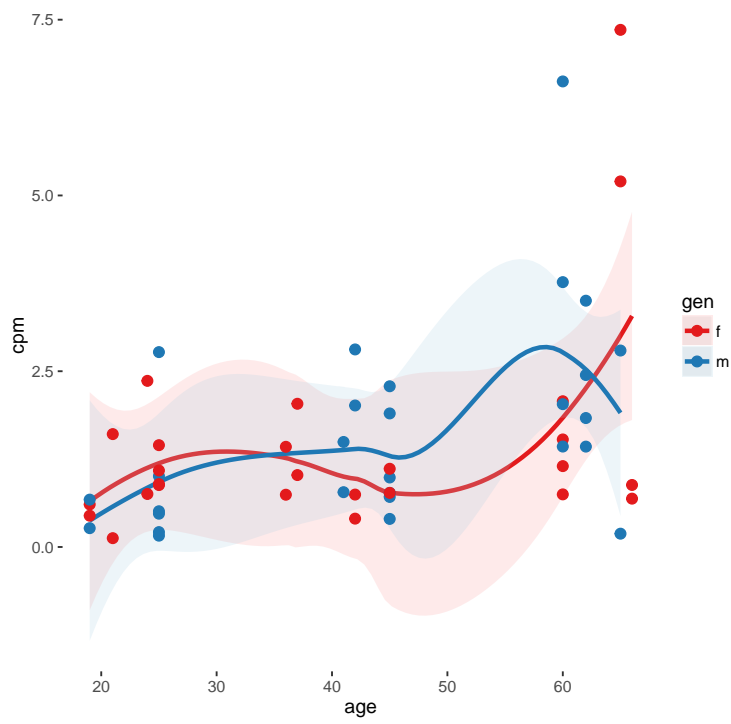

Figure 56: edgeR QLF test based CPM estimates  
Age related expression of CPZ

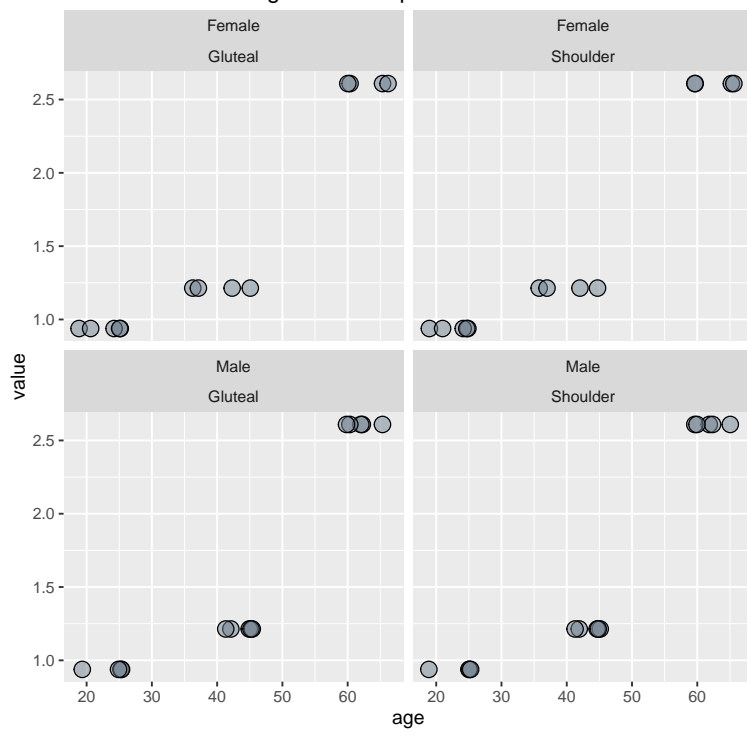

Figure 57: ReadExpSet based genewise CPM estimates  
Age related expression of CPZ

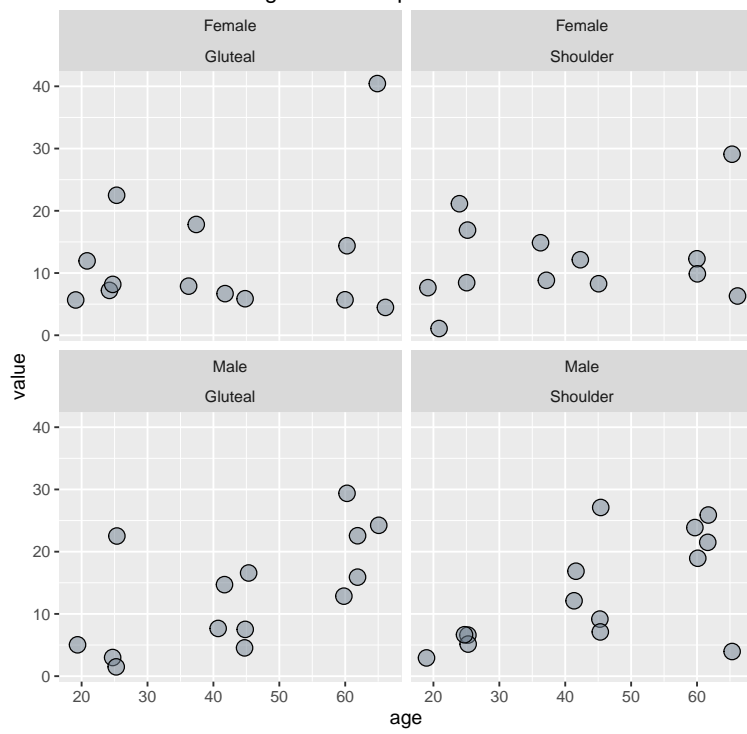

Figure 58: Loess regression for exon align depth

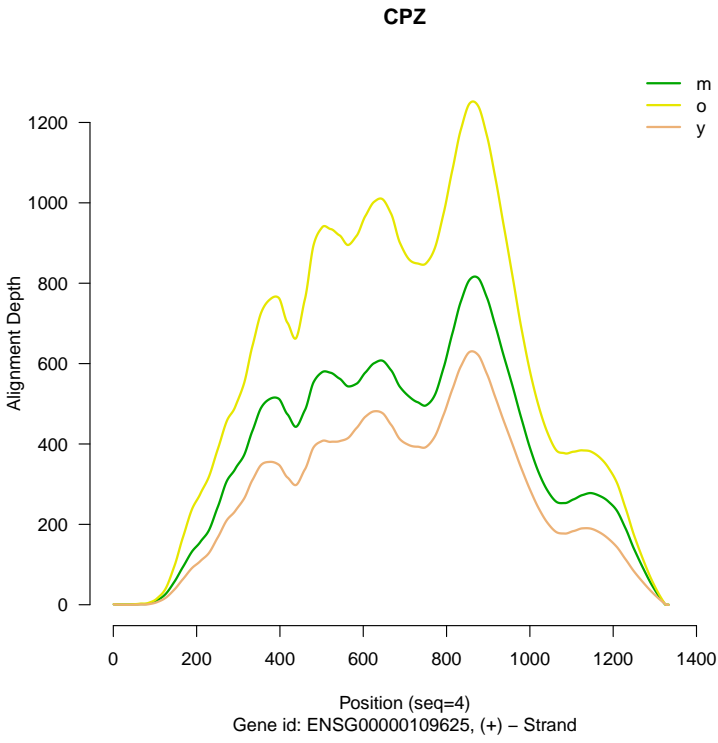

Figure 59: edgeR QLF test based CPM estimates

**Fitted read count values for gene CPZ**

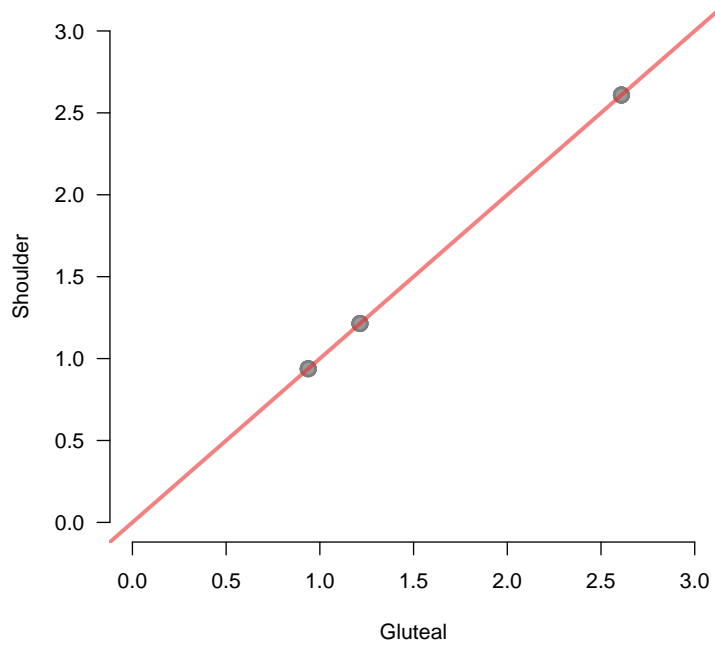



Figure 60: ReadExpSet based genewise CPM estimates

**Maximal gapped alignment depth for gene CPZ**

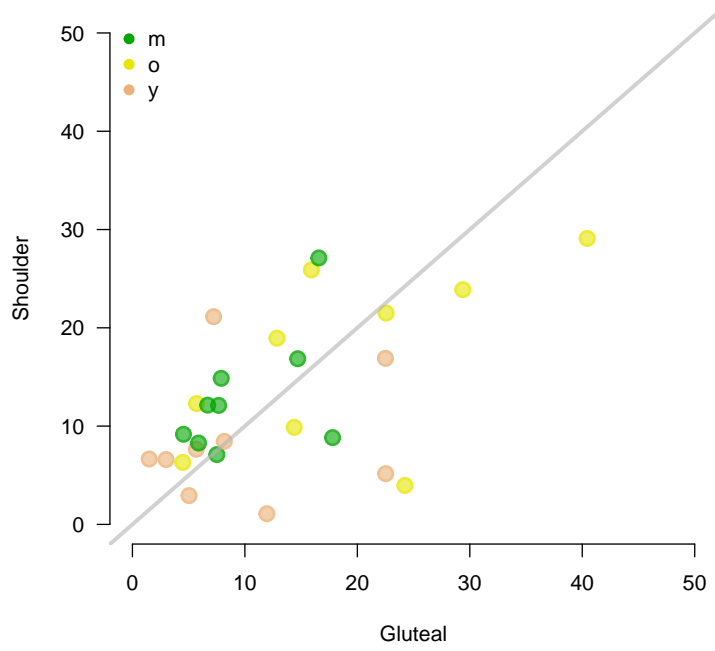

### 3.11 PRPS1

| Parameter | Value                                     |
|-----------|-------------------------------------------|
| gene_name | PRPS1                                     |
| gene_id   | ENSG00000147224                           |
| maxald    | 5550                                      |
| old       | down                                      |
| seqid     | X                                         |
| strand    | +                                         |
| start     | 107628424                                 |
| end       | 107651026                                 |
| descr     | phosphoribosyl pyrophosphate synthetase 1 |

Table 12: Gene identification

#### Gene expression estimates for Age

#### Influence of UV exposition on gene expression

Figure 61: Gene expression estimates based on CPM (SummarizeOveraps)  
Age related expression of PRPS1

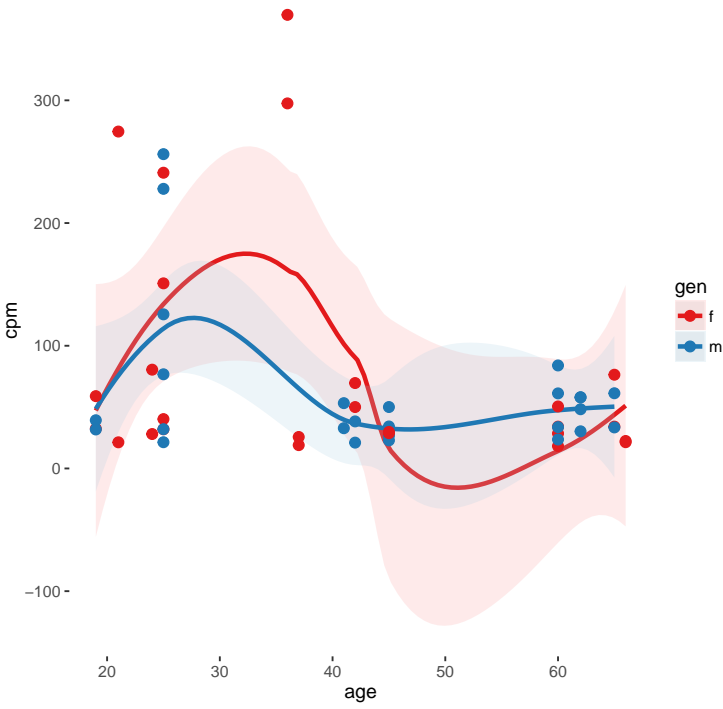

Figure 62: edgeR QLF test based CPM estimates  
Age related expression of PRPS1

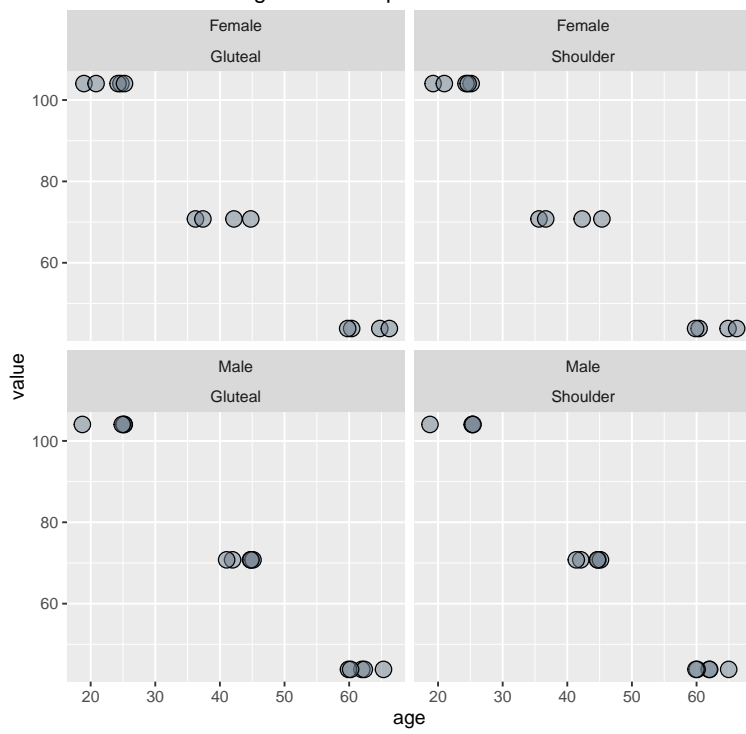

Figure 63: ReadExpSet based genewise CPM estimates  
Age related expression of PRPS1

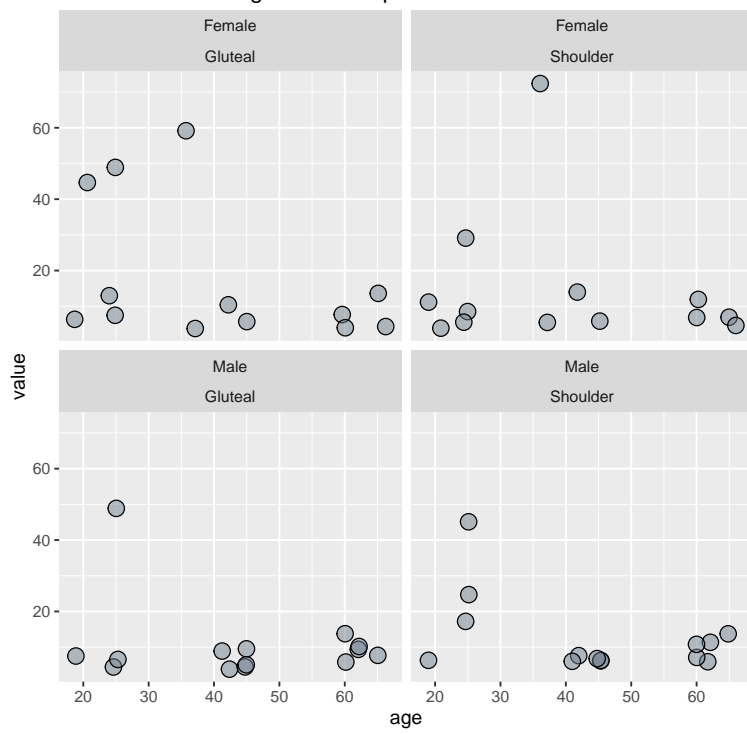

Figure 64: Loess regression for exon align depth

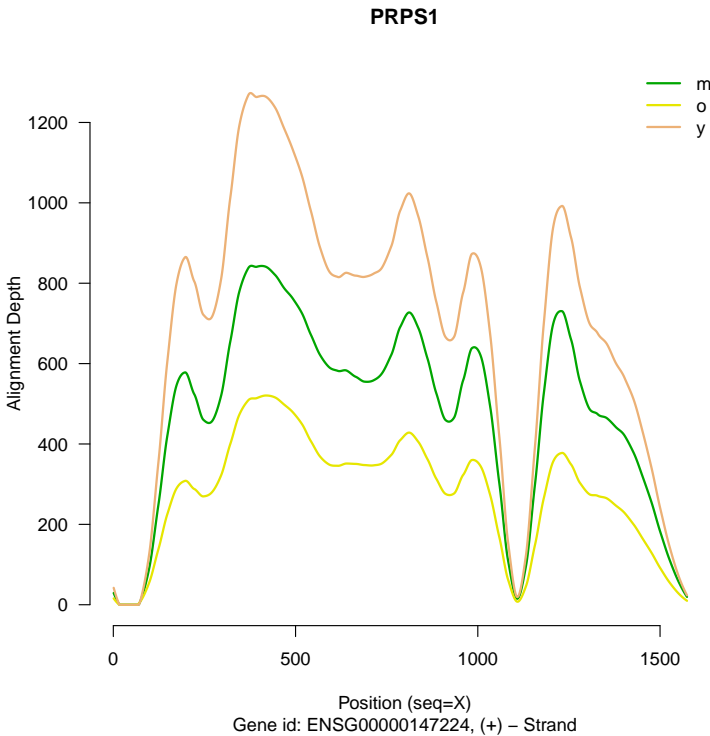

Figure 65: edgeR QLF test based CPM estimates

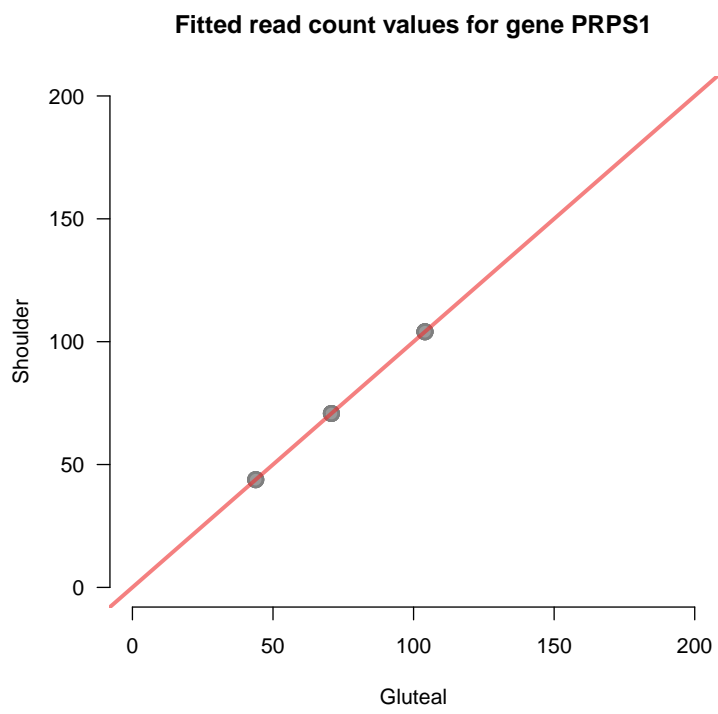

Figure 66: ReadExpSet based genewise CPM estimates

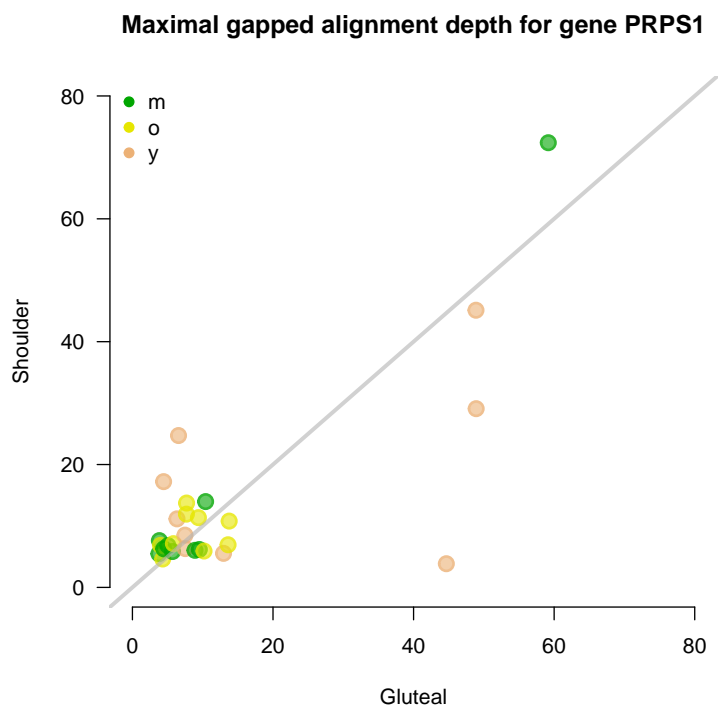



### 3.12 MEG3

| Parameter | Value                                       |
|-----------|---------------------------------------------|
| gene_name | MEG3                                        |
| gene_id   | ENSG00000214548                             |
| maxald    | 3031                                        |
| old       | down                                        |
| seqid     | 14                                          |
| strand    | +                                           |
| start     | 100779410                                   |
| end       | 100861031                                   |
| descr     | maternally expressed 3 (non-protein coding) |

Table 13: Gene identification

#### Gene expression estimates for Age

#### Influence of UV exposition on gene expression

Figure 67: Gene expression estimates based on CPM (SummarizeOveraps)

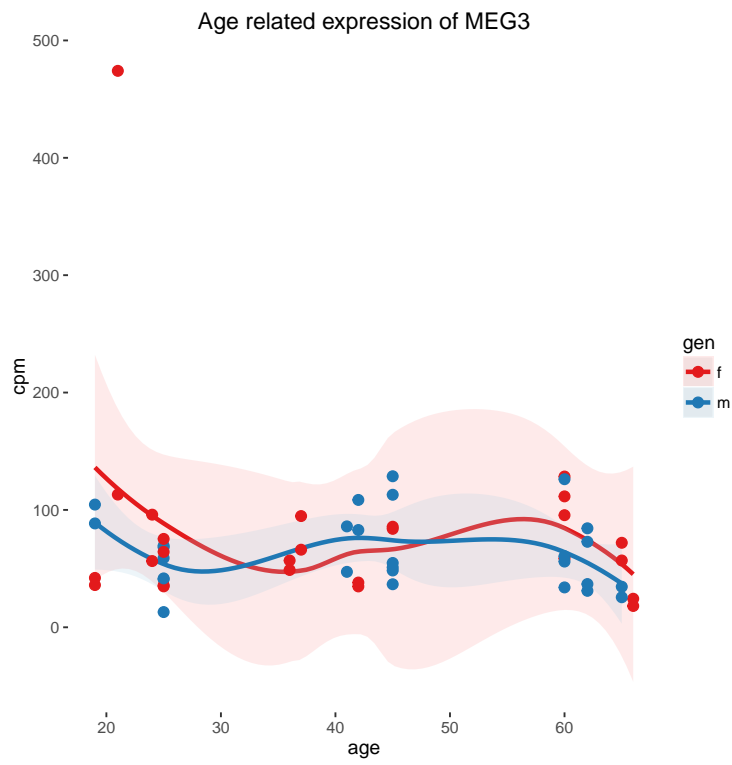

Figure 68: edgeR QLF test based CPM estimates  
Age related expression of MEG3

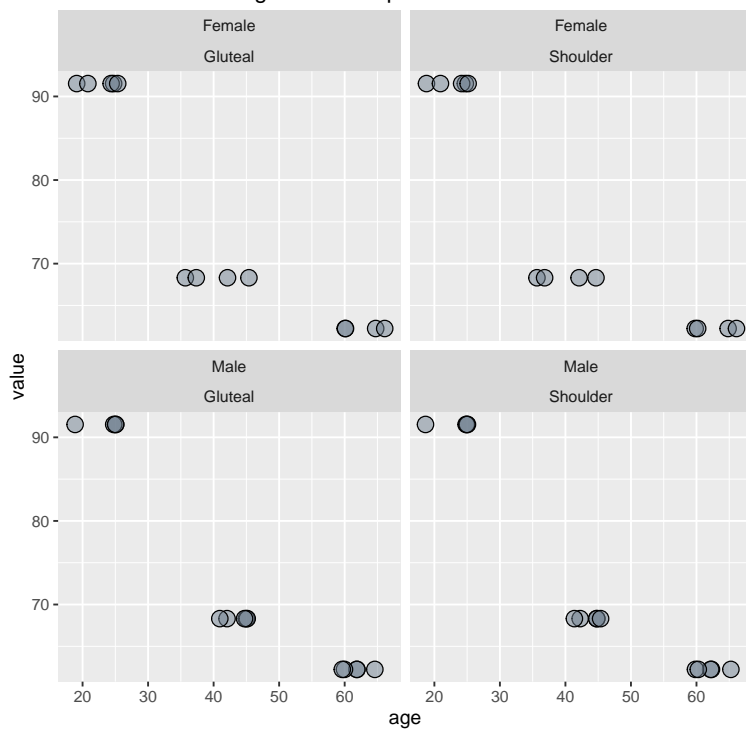

Figure 69: ReadExpSet based genewise CPM estimates  
Age related expression of MEG3

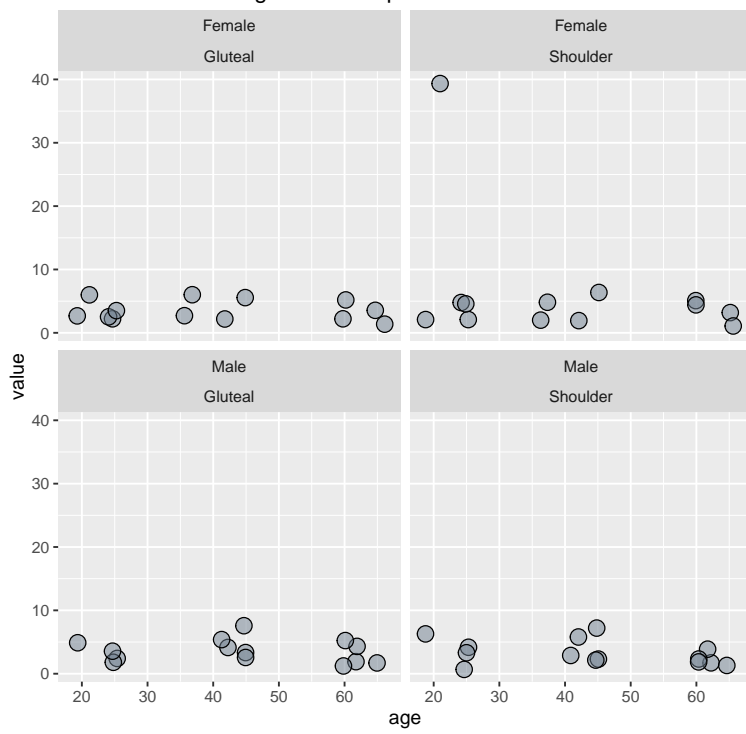

Figure 70: Loess regression for exon align depth

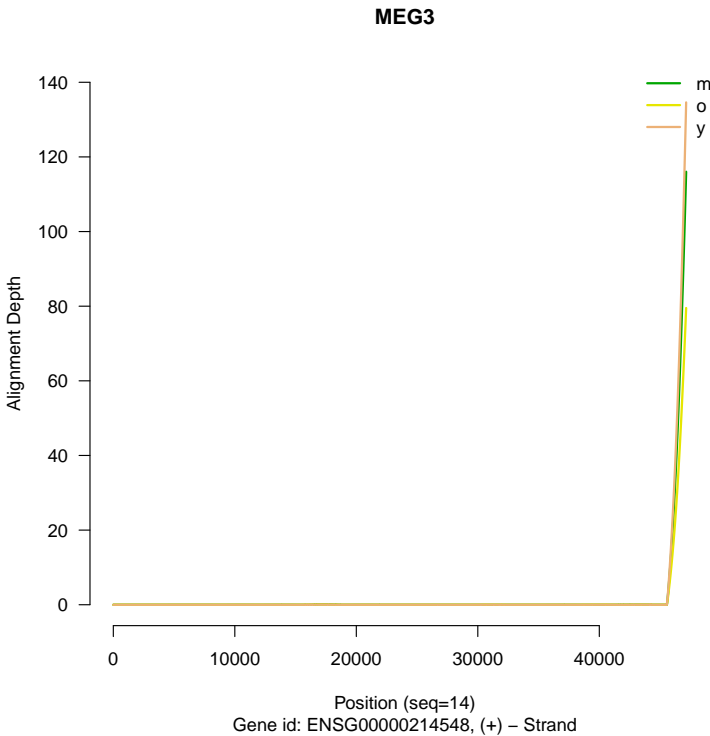

Figure 71: edgeR QLF test based CPM estimates

**Fitted read count values for gene MEG3**

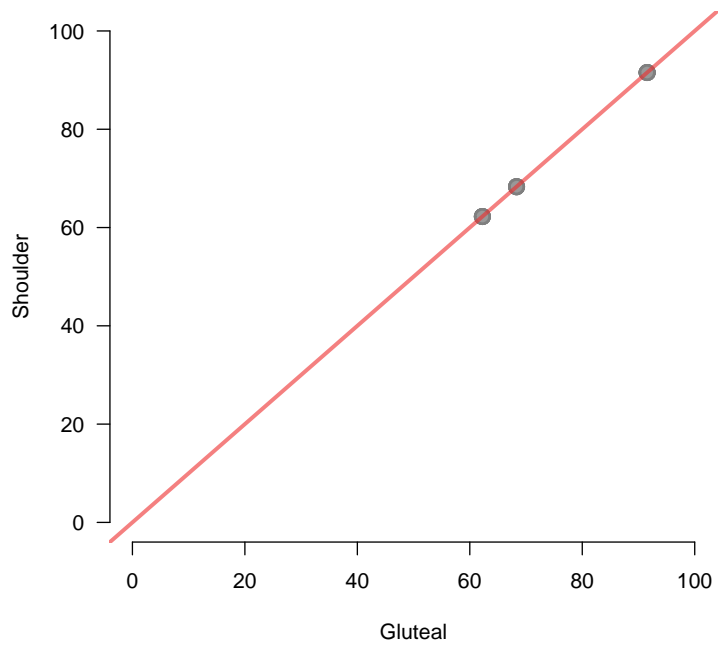

Figure 72: ReadExpSet based genewise CPM estimates

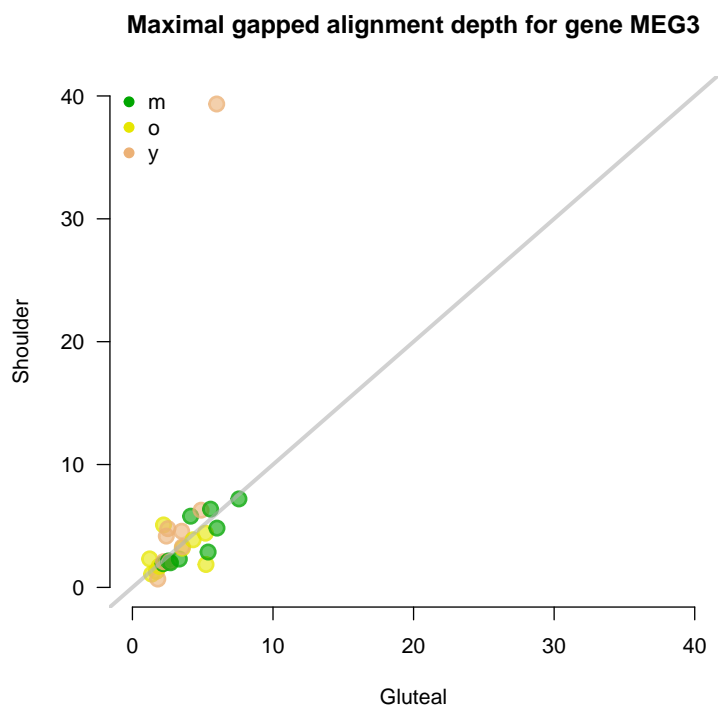

### 3.13 CNN1

| Parameter | Value                            |
|-----------|----------------------------------|
| gene_name | CNN1                             |
| gene_id   | ENSG00000130176                  |
| maxald    | 16224                            |
| old       | down                             |
| seqid     | 19                               |
| strand    | +                                |
| start     | 11538717                         |
| end       | 11550323                         |
| descr     | calponin 1, basic, smooth muscle |

Table 14: Gene identification

#### Gene expression estimates for Age

#### Influence of UV exposition on gene expression



Figure 73: Gene expression estimates based on CPM (SummarizeOveraps)  
Age related expression of CNN1

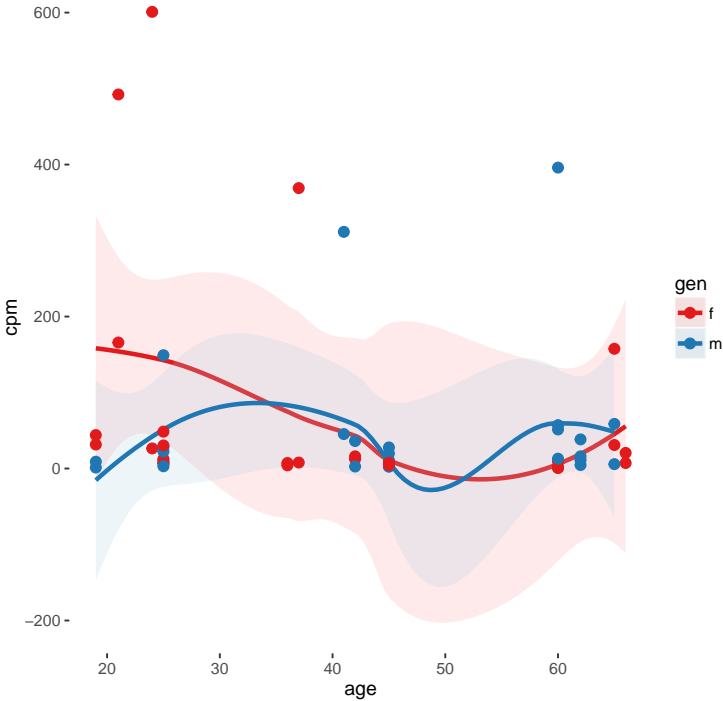

Figure 74: edgeR QLF test based CPM estimates  
Age related expression of CNN1

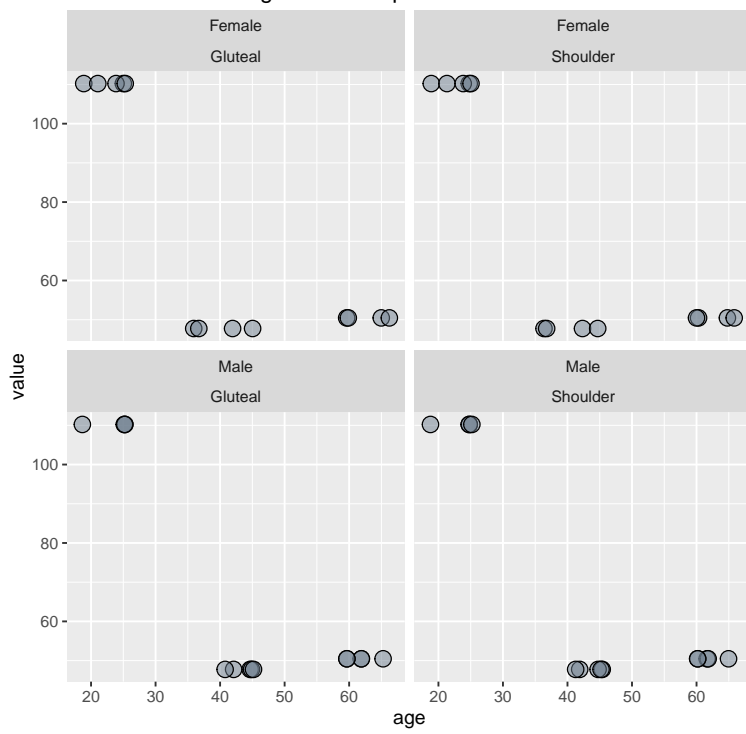

Figure 75: ReadExpSet based genewise CPM estimates  
Age related expression of CNN1

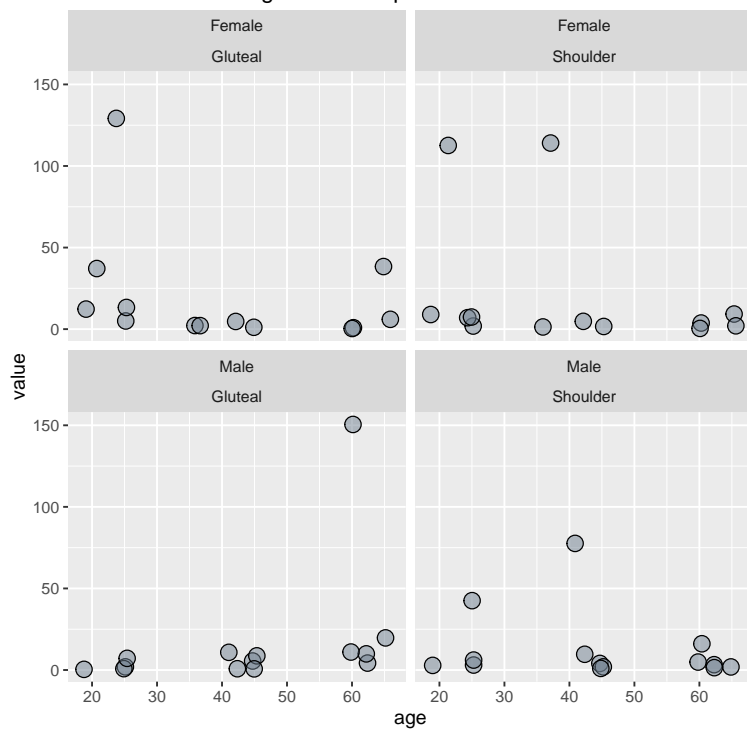

Figure 76: Loess regression for exon align depth

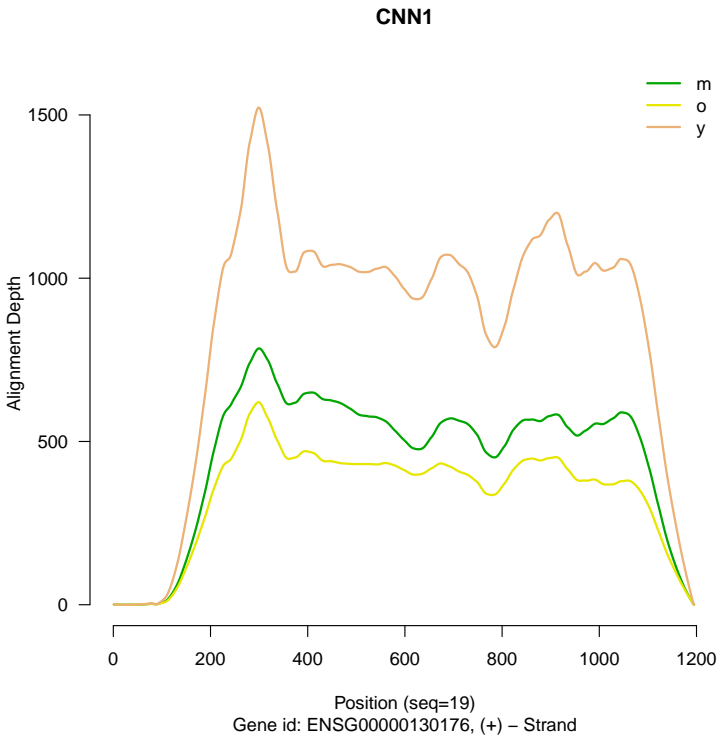

Figure 77: edgeR QLF test based CPM estimates

**Fitted read count values for gene CNN1**

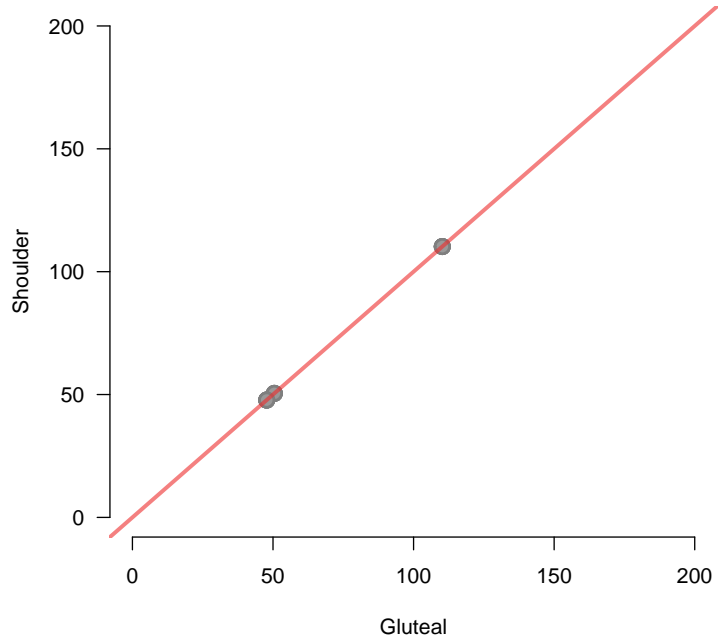

Figure 78: ReadExpSet based genewise CPM estimates

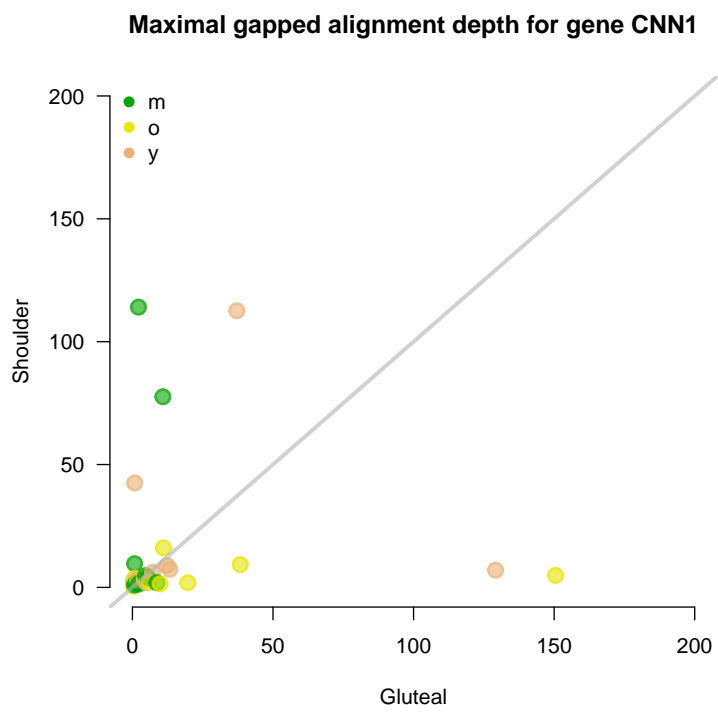

### 3.14 STC1

| Parameter | Value           |
|-----------|-----------------|
| gene_name | STC1            |
| gene_id   | ENSG00000159167 |
| maxald    | 1877            |
| old       | up              |
| seqid     | 8               |
| strand    | -               |
| start     | 23841915        |
| end       | 23854807        |
| descr     | stanniocalcin 1 |

Table 15: Gene identification

#### Gene expression estimates for Age

#### Influence of UV exposition on gene expression

Figure 79: Gene expression estimates based on CPM (SummarizeOveraps)  
Age related expression of STC1

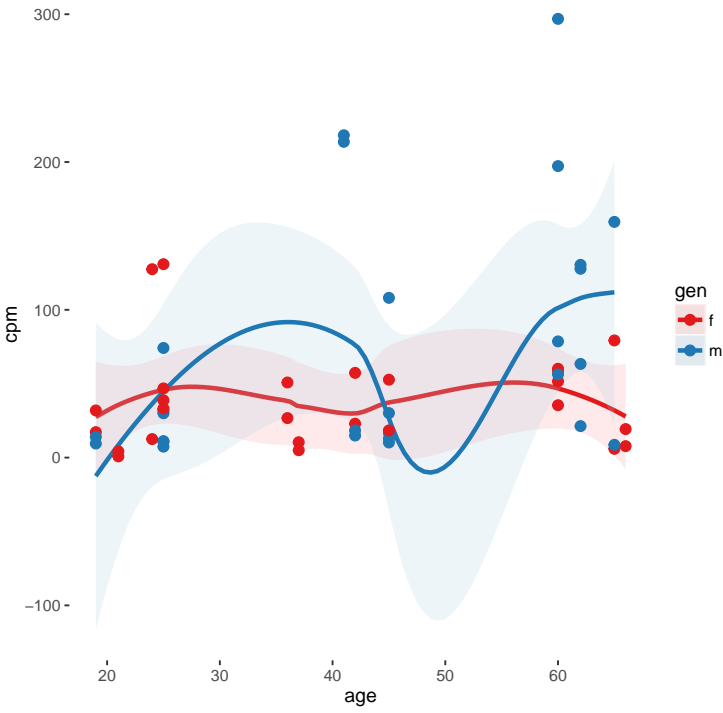



Figure 80: edgeR QLF test based CPM estimates  
Age related expression of STC1

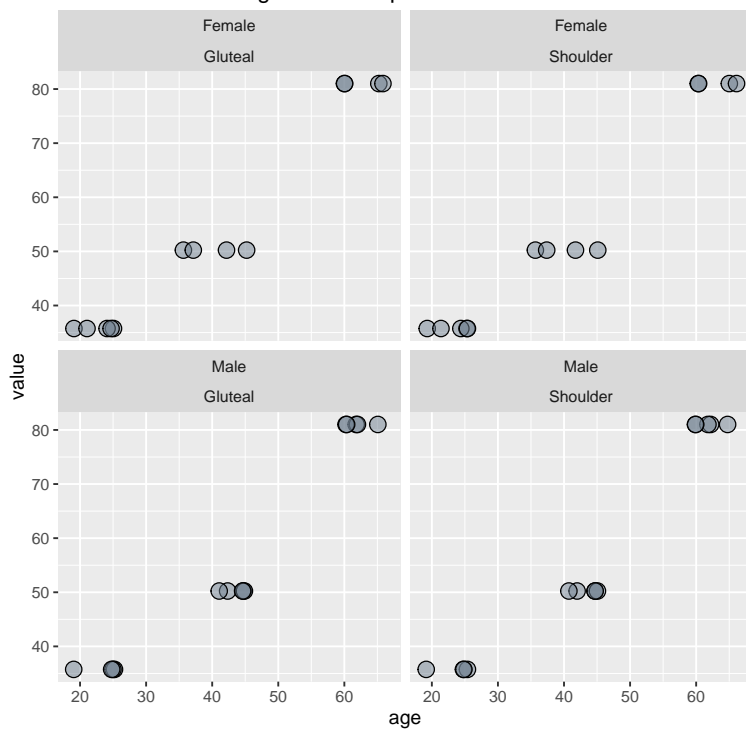

Figure 81: ReadExpSet based genewise CPM estimates  
Age related expression of STC1

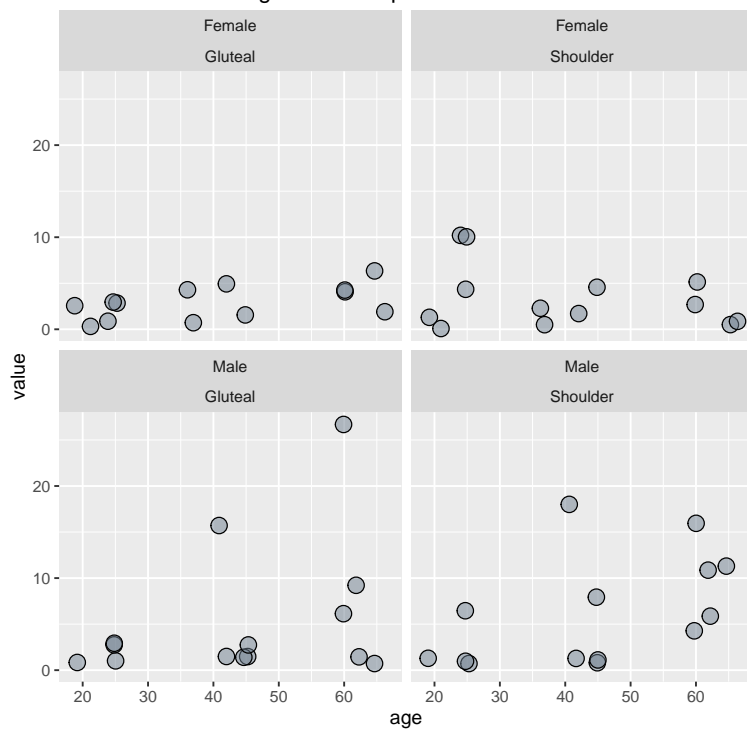

Figure 82: Loess regression for exon align depth

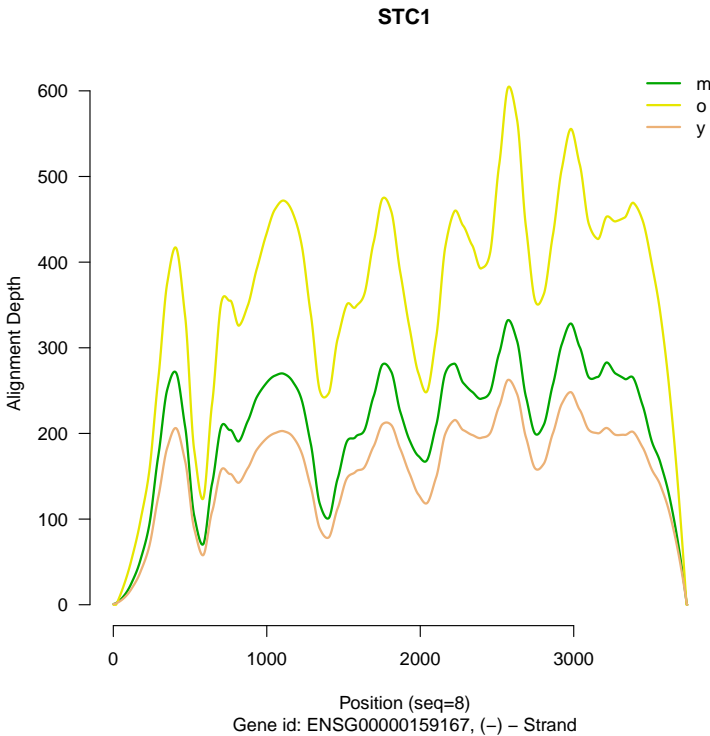

Figure 83: edgeR QLF test based CPM estimates

**Fitted read count values for gene STC1**

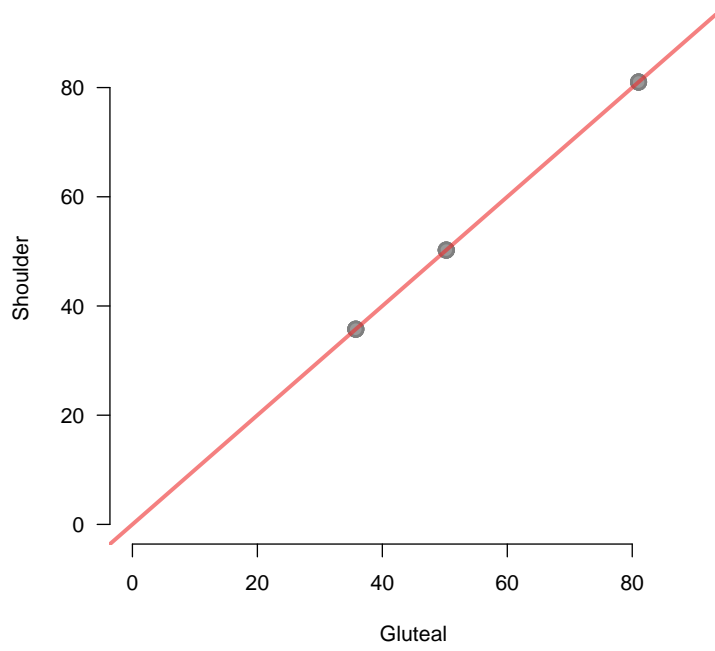

Figure 84: ReadExpSet based genewise CPM estimates

**Maximal gapped alignment depth for gene STC1**

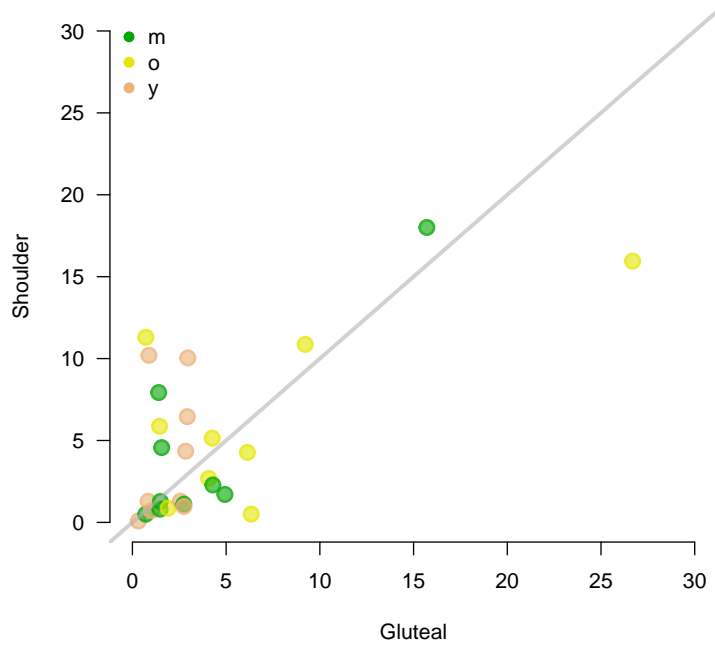

### 3.15 KIAA1324L

| Parameter | Value           |
|-----------|-----------------|
| gene_name | KIAA1324L       |
| gene_id   | ENSG00000164659 |
| maxald    | 1751            |
| old       | up              |
| seqid     | 7               |
| strand    | -               |
| start     | 86876906        |
| end       | 87059699        |
| descr     | KIAA1324-like   |

Table 16: Gene identification

#### Gene expression estimates for Age

#### Influence of UV exposition on gene expression

Figure 85: Gene expression estimates based on CPM (SummarizeOveraps)  
Age related expression of KIAA1324L

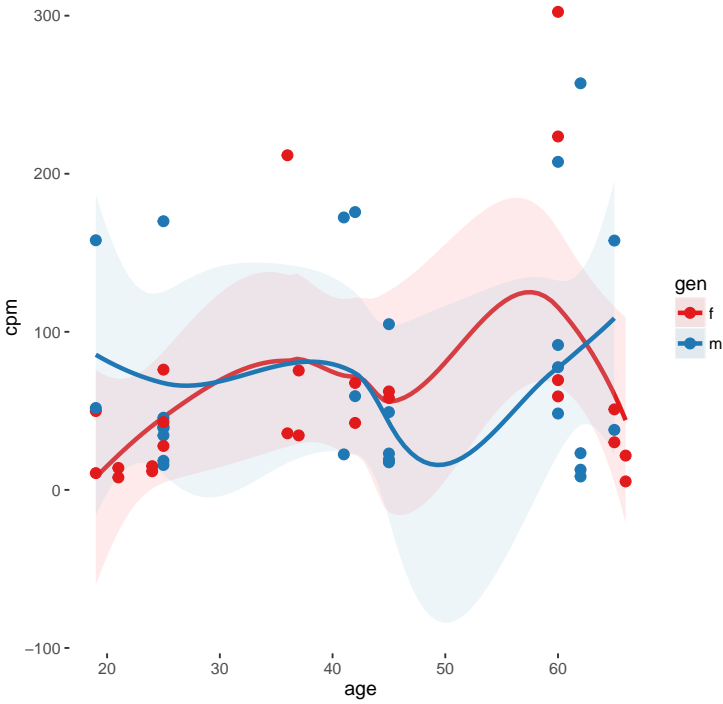

Figure 86: edgeR QLF test based CPM estimates  
Age related expression of KIAA1324L

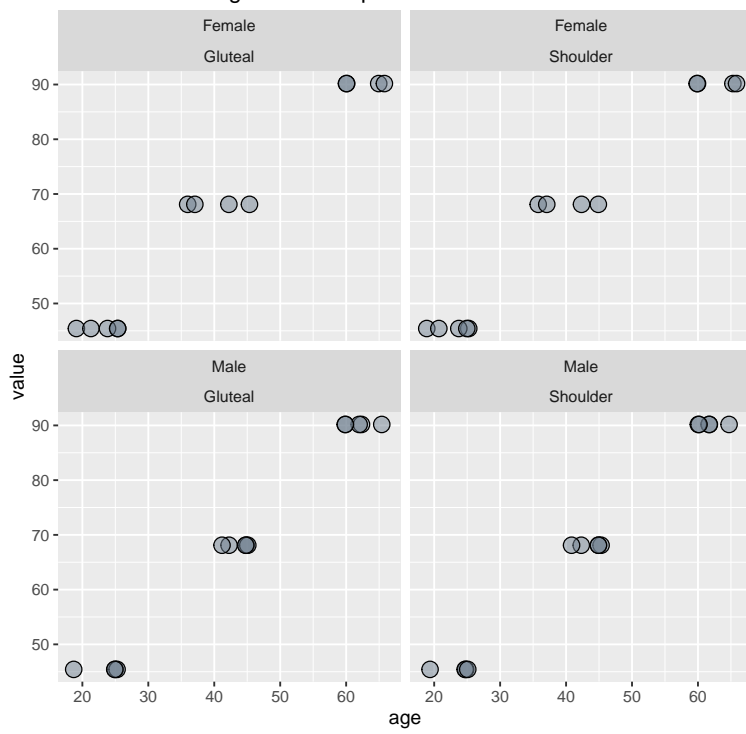



Figure 87: ReadExpSet based genewise CPM estimates  
Age related expression of KIAA1324L

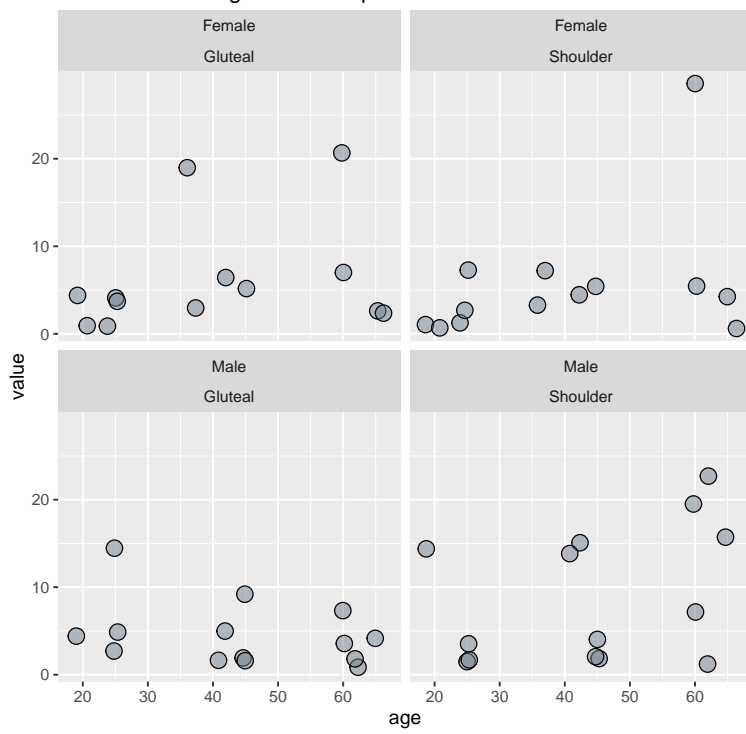

Figure 88: Loess regression for exon align depth

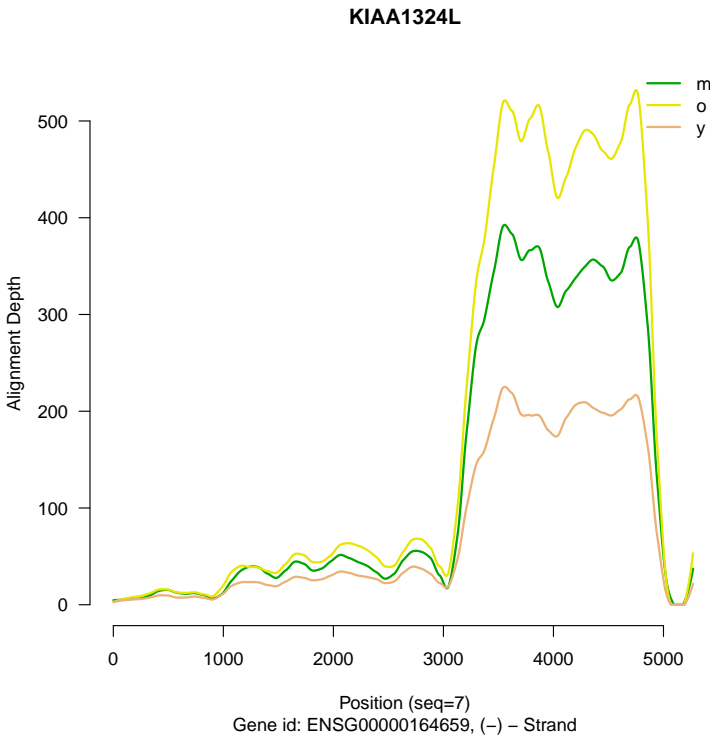

Figure 89: edgeR QLF test based CPM estimates

**Fitted read count values for gene KIAA1324L**

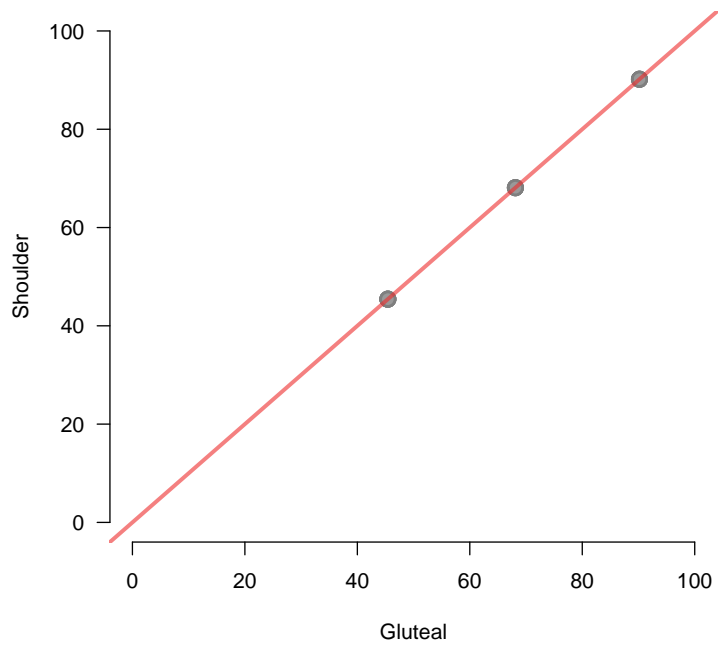

Figure 90: ReadExpSet based genewise CPM estimates

**Maximal gapped alignment depth for gene KIAA1324L**

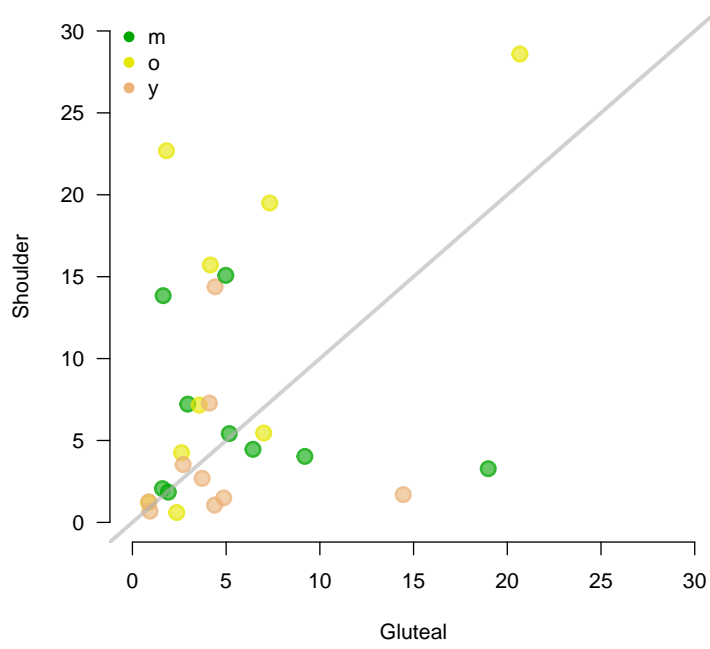

### 3.16 TRNP1

| Parameter | Value                            |
|-----------|----------------------------------|
| gene_name | TRNP1                            |
| gene_id   | ENSG00000253368                  |
| maxald    | 3613                             |
| old       | down                             |
| seqid     | 1                                |
| strand    | +                                |
| start     | 26993707                         |
| end       | 27000898                         |
| descr     | TMF1-regulated nuclear protein 1 |

Table 17: Gene identification

**Gene expression estimates for Age**

**Influence of UV exposition on gene expression**

Figure 91: Gene expression estimates based on CPM (SummarizeOveraps)  
Age related expression of TRNP1

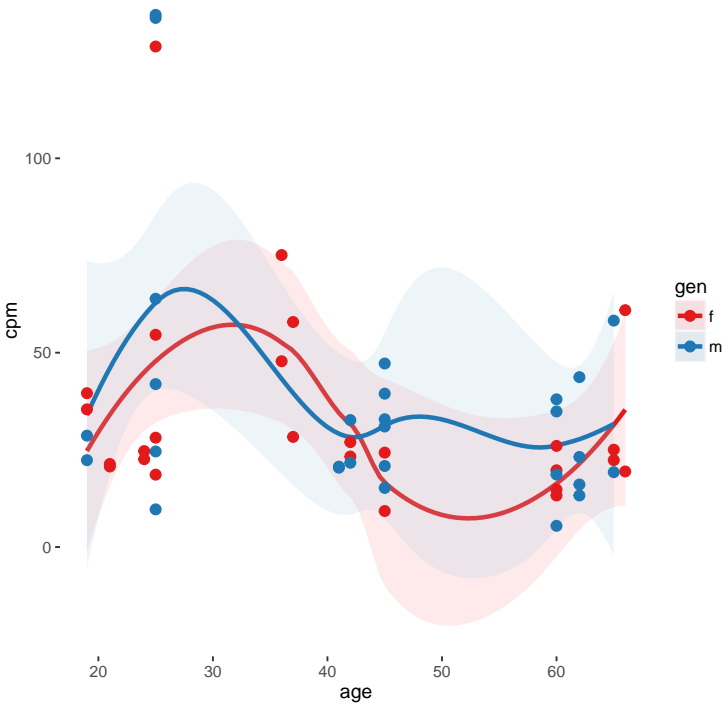

Figure 92: edgeR QLF test based CPM estimates  
Age related expression of TRNP1

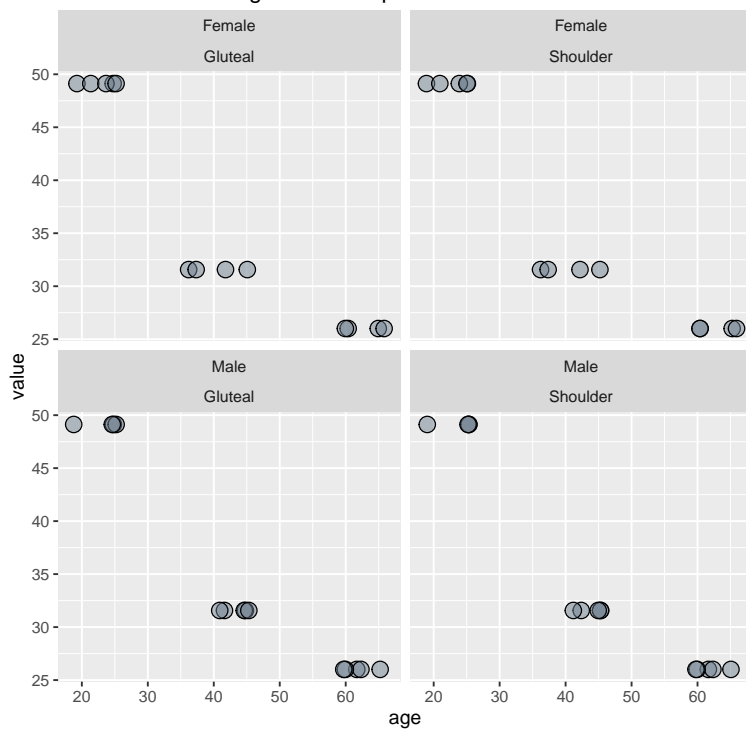

Figure 93: ReadExpSet based genewise CPM estimates  
Age related expression of TRNP1

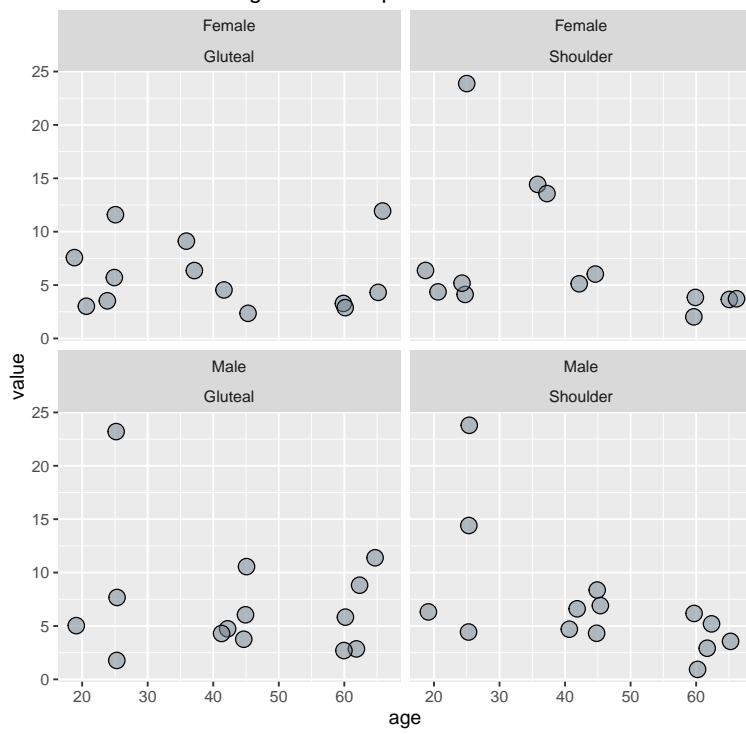



Figure 94: Loess regression for exon align depth

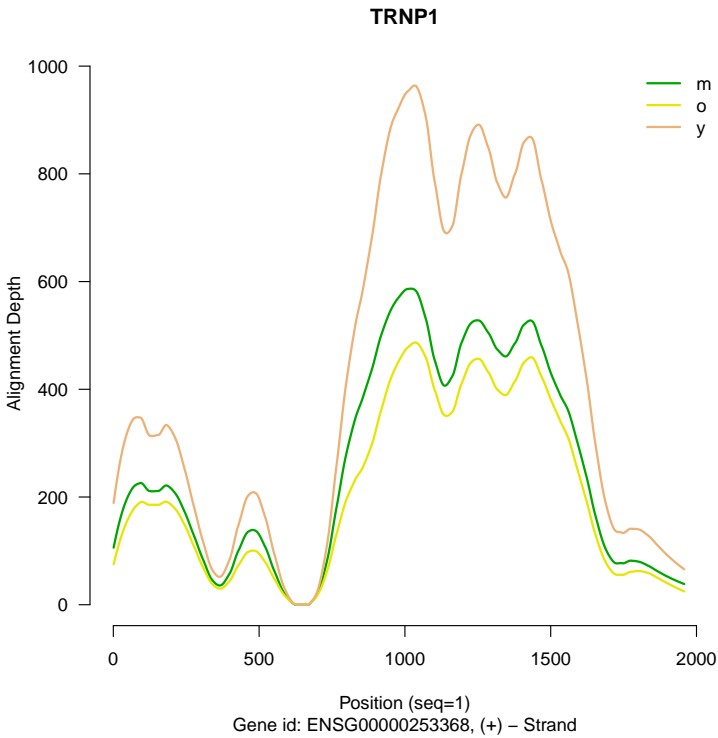

Figure 95: edgeR QLF test based CPM estimates

**Fitted read count values for gene TRNP1**

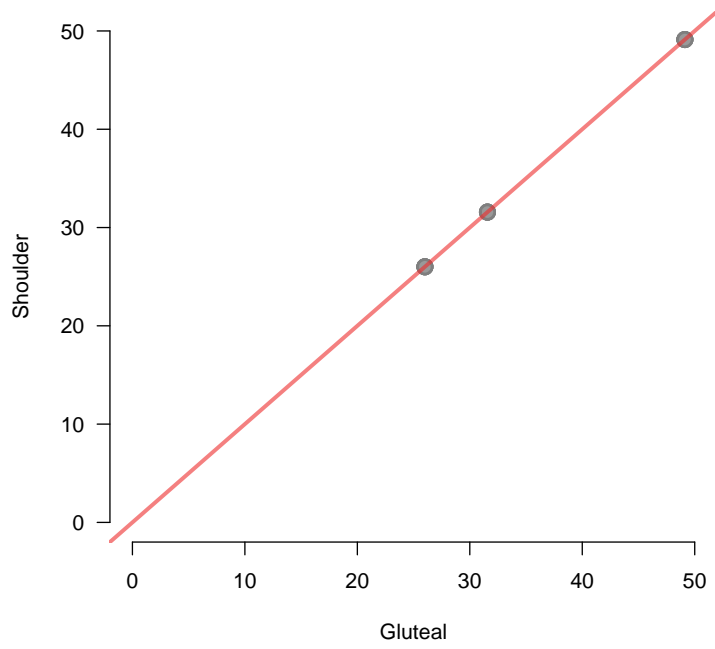

Figure 96: ReadExpSet based genewise CPM estimates

**Maximal gapped alignment depth for gene TRNP1**

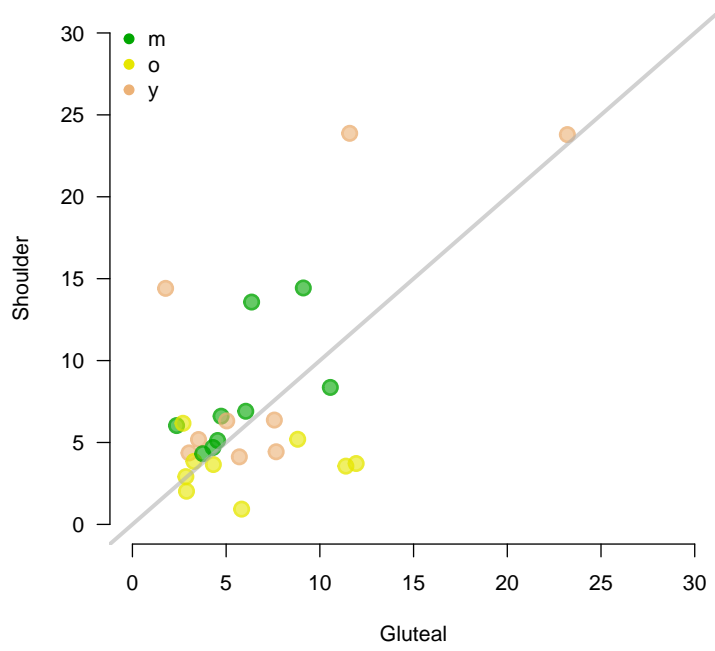

### 3.17 HSPB7

| Parameter | Value                                                      |
|-----------|------------------------------------------------------------|
| gene_name | HSPB7                                                      |
| gene_id   | ENSG00000173641                                            |
| maxald    | 14954                                                      |
| old       | down                                                       |
| seqid     | 1                                                          |
| strand    | -                                                          |
| start     | 16014028                                                   |
| end       | 16019594                                                   |
| descr     | heat shock 27kDa protein family, member 7 (cardiovascular) |

Table 18: Gene identification

#### Gene expression estimates for Age

#### Influence of UV exposition on gene expression

Figure 97: Gene expression estimates based on CPM (SummarizeOveraps)  
Age related expression of HSPB7

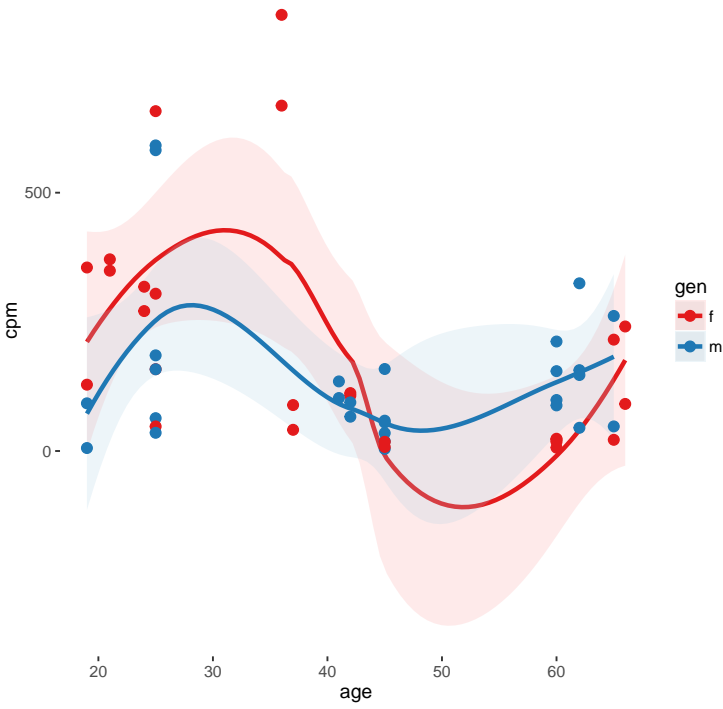

Figure 98: edgeR QLF test based CPM estimates  
Age related expression of HSPB7

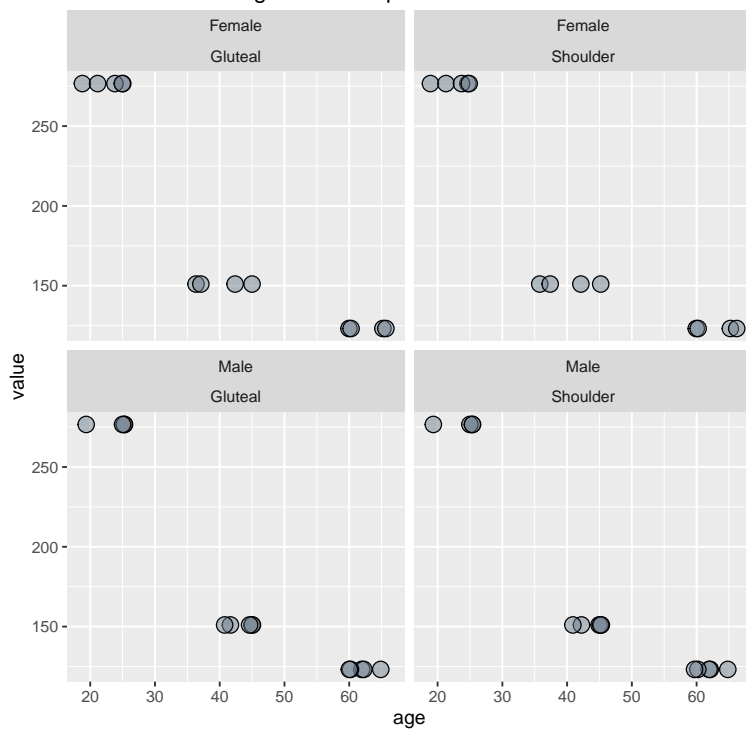

Figure 99: ReadExpSet based genewise CPM estimates  
Age related expression of HSPB7

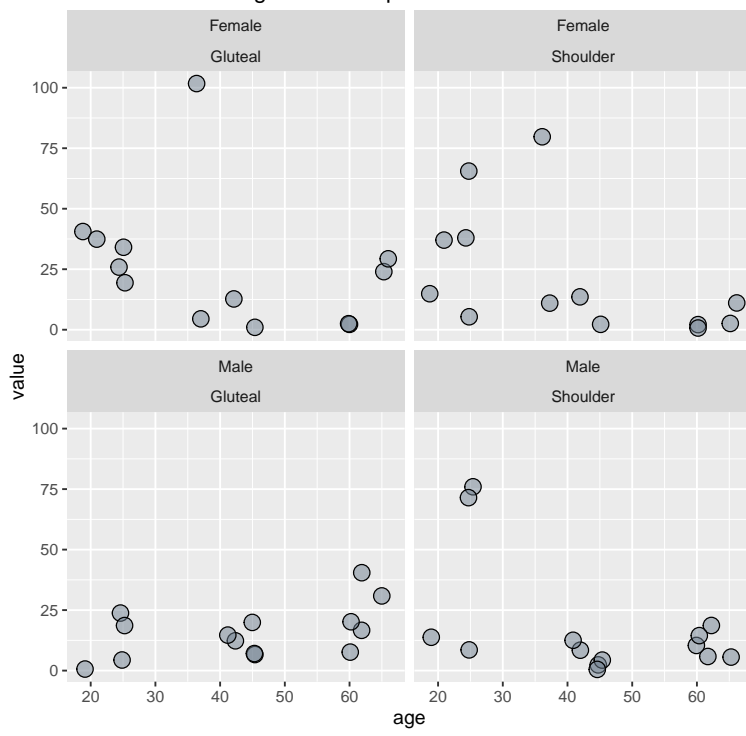

Figure 100: Loess regression for exon align depth

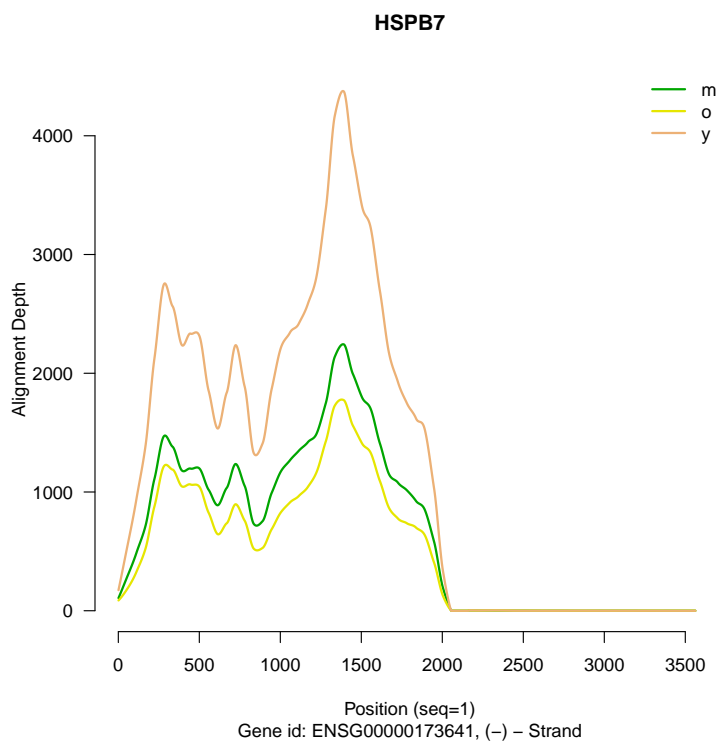



Figure 101: edgeR QLF test based CPM estimates

**Fitted read count values for gene HSPB7**

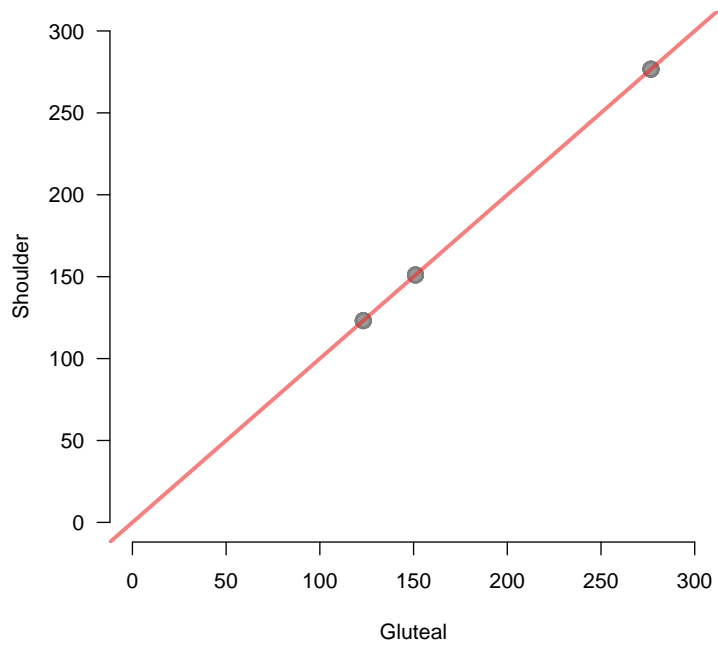

Figure 102: ReadExpSet based genewise CPM estimates

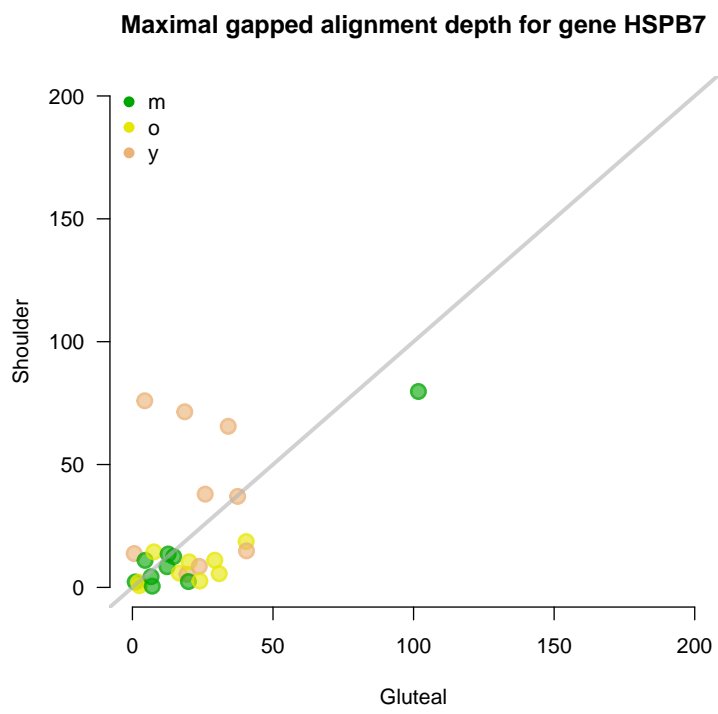

### 3.18 PRRX2

| Parameter | Value                     |
|-----------|---------------------------|
| gene_name | PRRX2                     |
| gene_id   | ENSG00000167157           |
| maxald    | 6616                      |
| old       | down                      |
| seqid     | 9                         |
| strand    | +                         |
| start     | 129665641                 |
| end       | 129722674                 |
| descr     | paired related homeobox 2 |

Table 19: Gene identification

#### Gene expression estimates for Age

#### Influence of UV exposition on gene expression

Figure 103: Gene expression estimates based on CPM (SummarizeOveraps)  
Age related expression of PRRX2

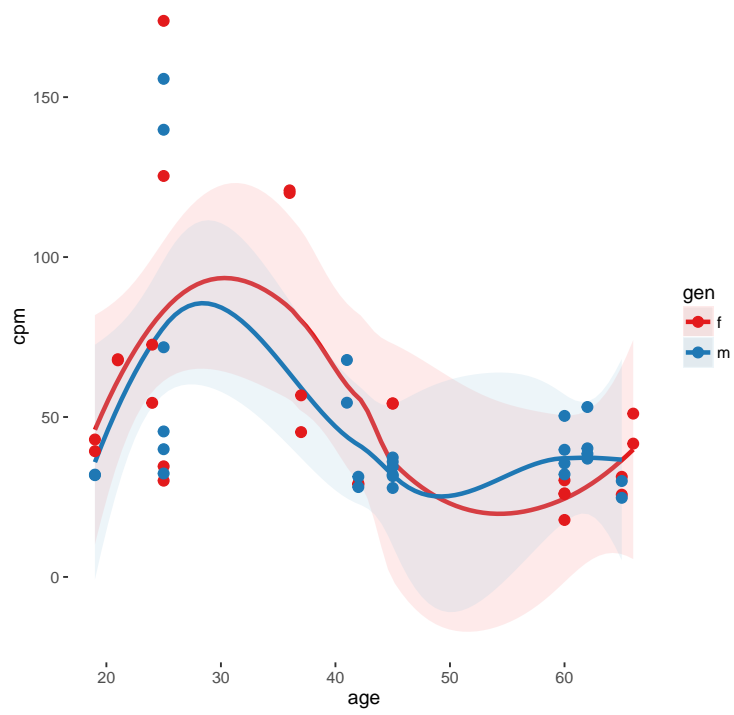

Figure 104: edgeR QLF test based CPM estimates  
Age related expression of PRRX2

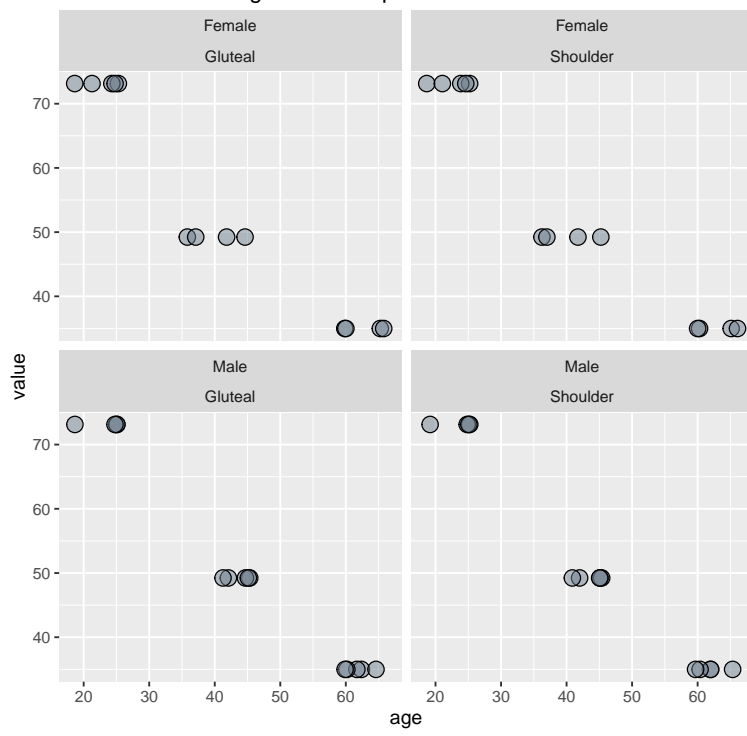

Figure 105: ReadExpSet based genewise CPM estimates  
Age related expression of PRRX2

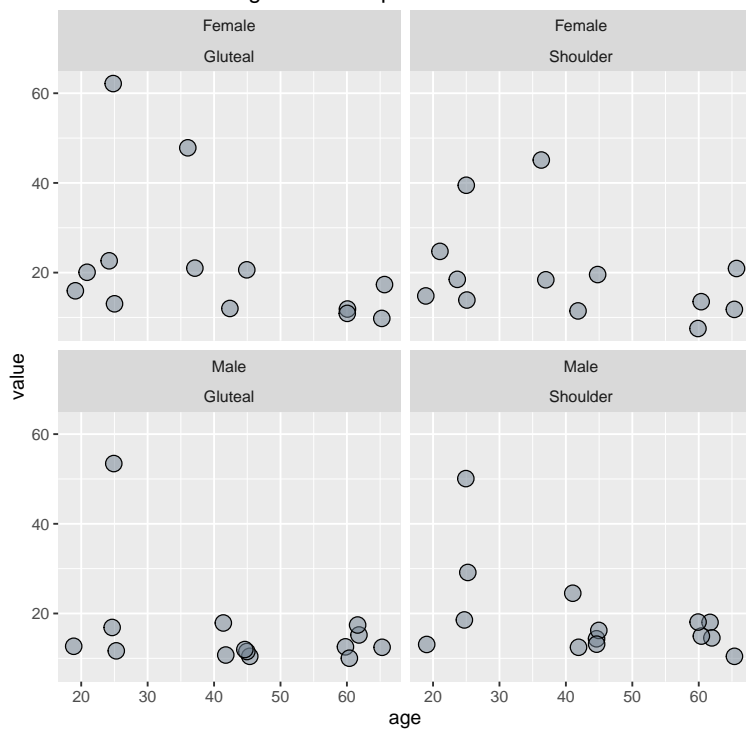

Figure 106: Loess regression for exon align depth

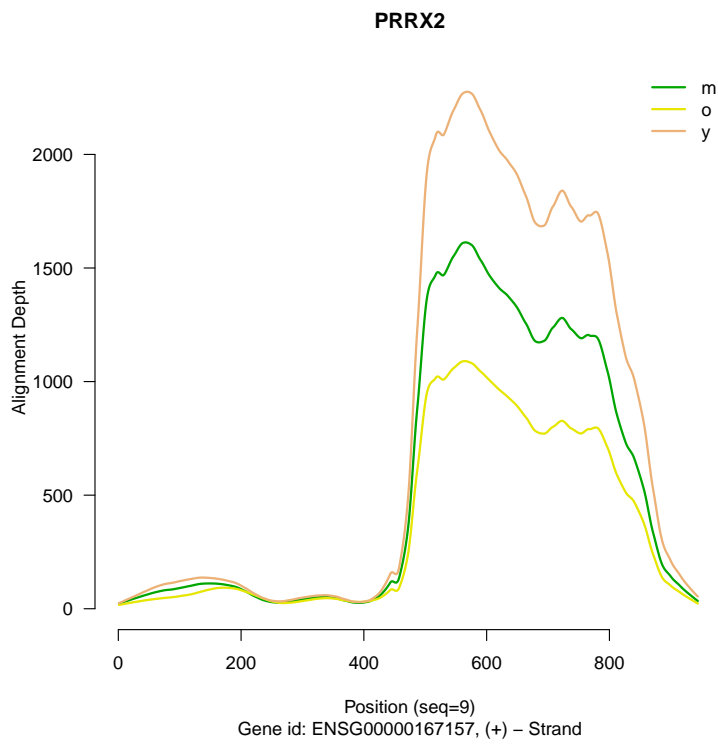

Figure 107: edgeR QLF test based CPM estimates

**Fitted read count values for gene PRRX2**

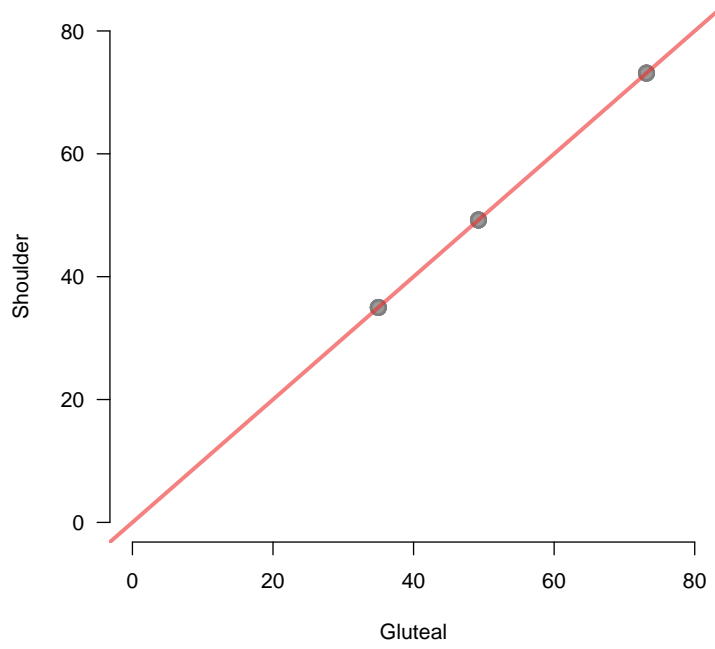



Figure 108: ReadExpSet based genewise CPM estimates

**Maximal gapped alignment depth for gene PRRX2**

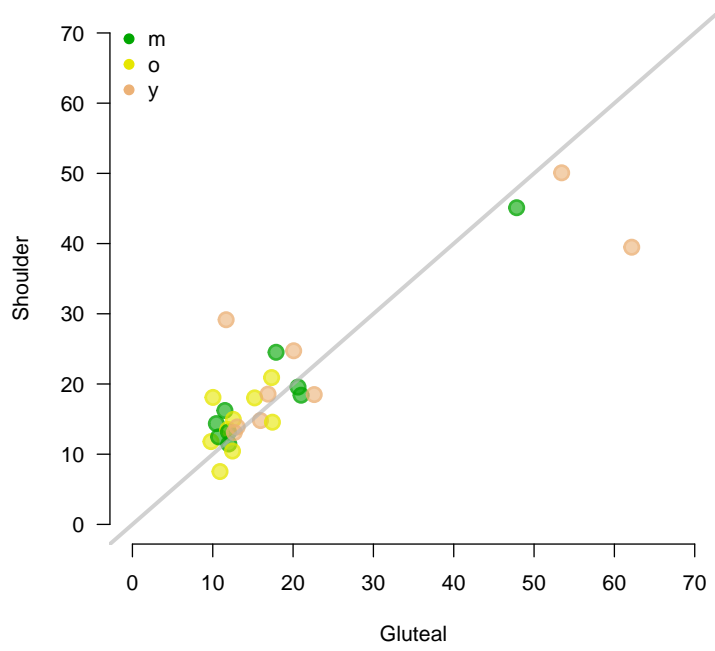

### 3.19 SMAD7

| Parameter | Value                |
|-----------|----------------------|
| gene_name | SMAD7                |
| gene_id   | ENSG00000101665      |
| maxald    | 3768                 |
| old       | down                 |
| seqid     | 18                   |
| strand    | -                    |
| start     | 48919853             |
| end       | 48950711             |
| descr     | SMAD family member 7 |

Table 20: Gene identification

#### Gene expression estimates for Age

#### Influence of UV exposition on gene expression

Figure 109: Gene expression estimates based on CPM (SummarizeOveraps)  
Age related expression of SMAD7

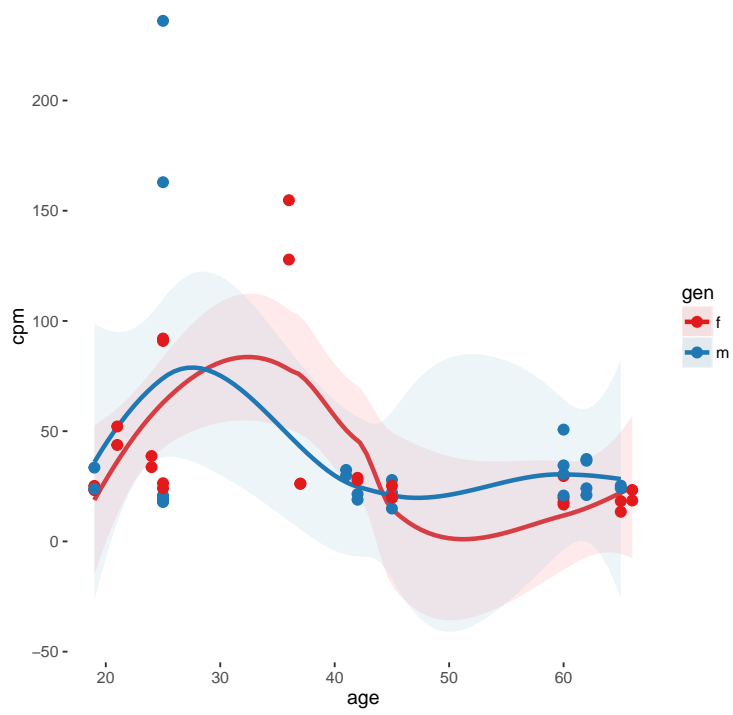

Figure 110: edgeR QLF test based CPM estimates  
Age related expression of SMAD7

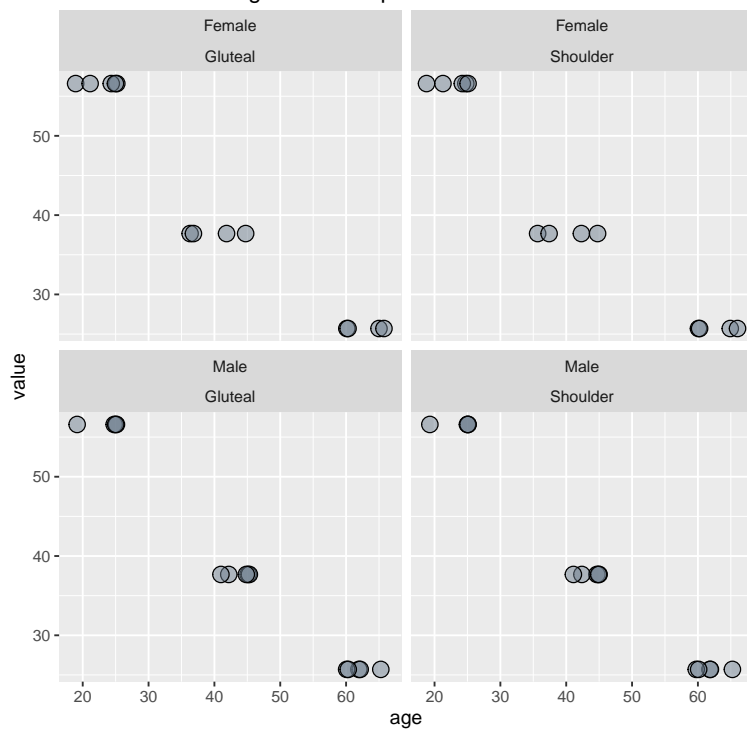

Figure 111: ReadExpSet based genewise CPM estimates  
Age related expression of SMAD7

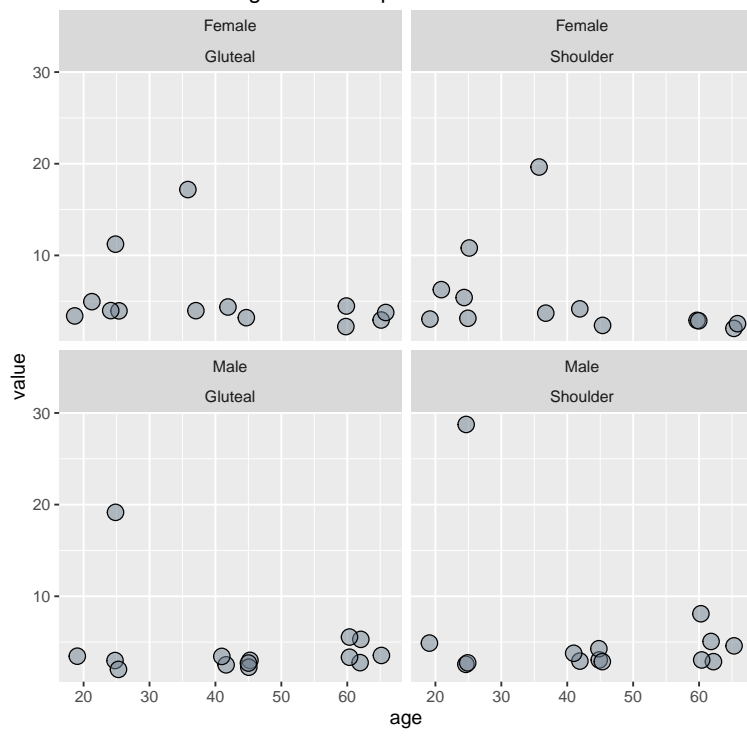

Figure 112: Loess regression for exon align depth

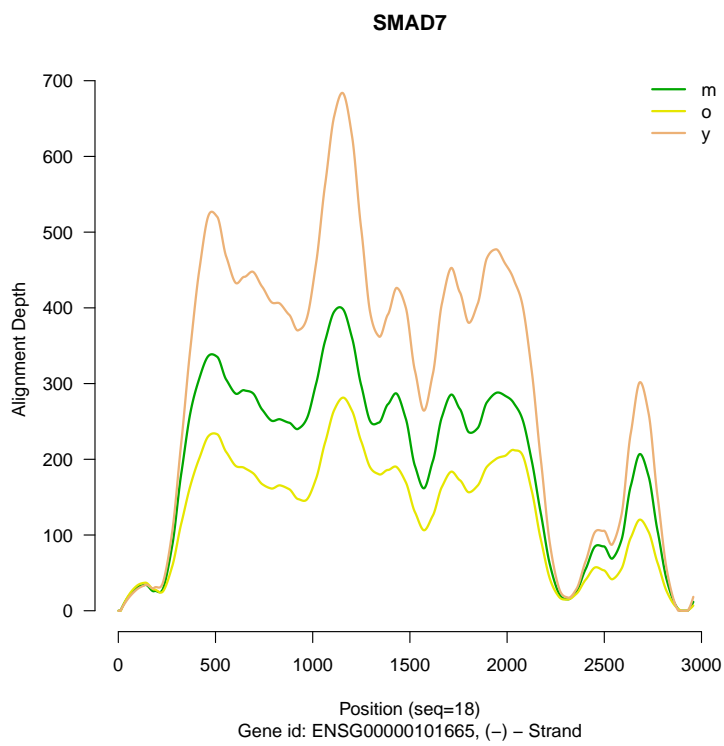

Figure 113: edgeR QLF test based CPM estimates

**Fitted read count values for gene SMAD7**

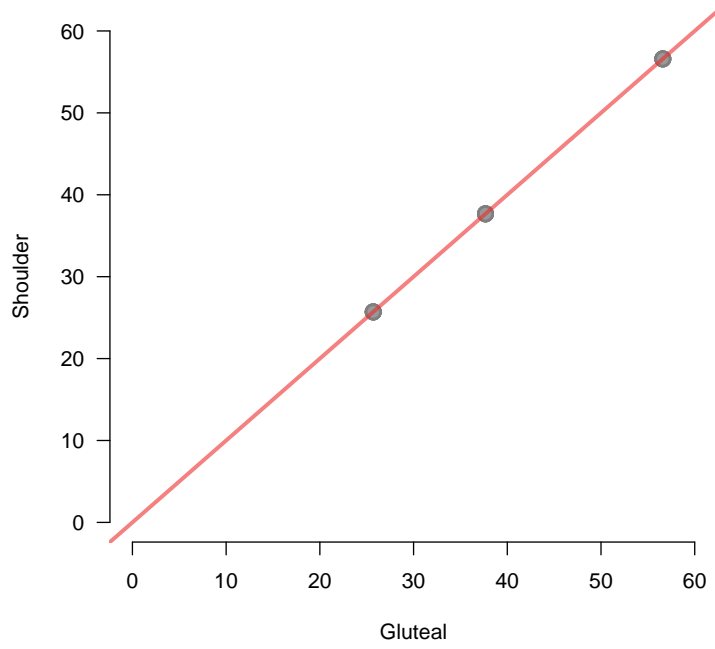

Figure 114: ReadExpSet based genewise CPM estimates

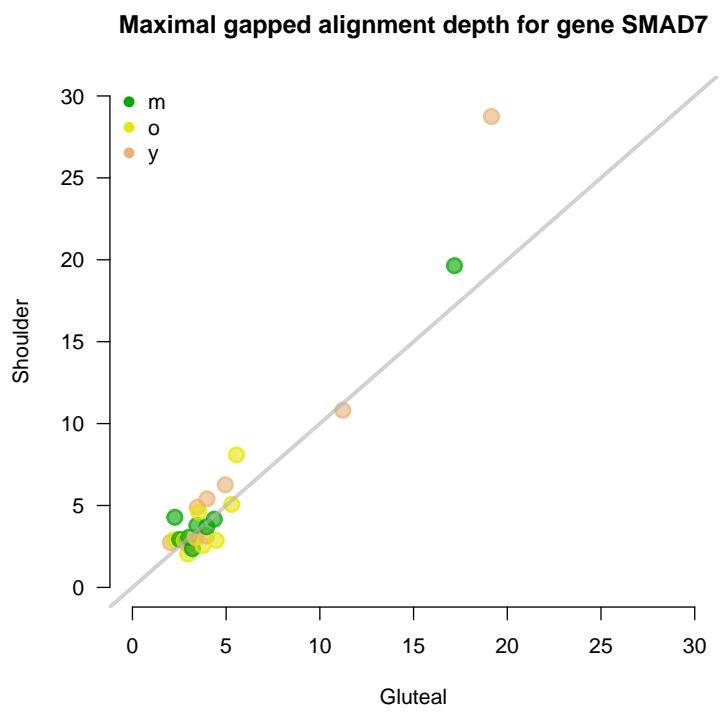



### 3.20 FAM83G

| Parameter | Value                                        |
|-----------|----------------------------------------------|
| gene_name | FAM83G                                       |
| gene_id   | ENSG00000188522                              |
| maxald    | 523                                          |
| old       | down                                         |
| seqid     | 17                                           |
| strand    | -                                            |
| start     | 18968789                                     |
| end       | 19004804                                     |
| descr     | family with sequence similarity 83, member G |

Table 21: Gene identification

#### Gene expression estimates for Age

#### Influence of UV exposition on gene expression

Figure 115: Gene expression estimates based on CPM (SummarizeOveraps)  
Age related expression of FAM83G

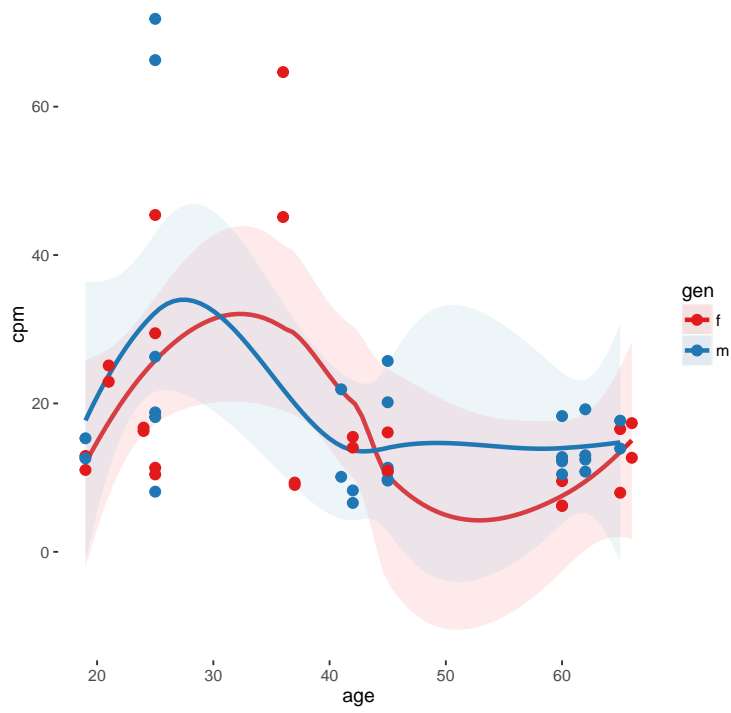

Figure 116: edgeR QLF test based CPM estimates  
Age related expression of FAM83G

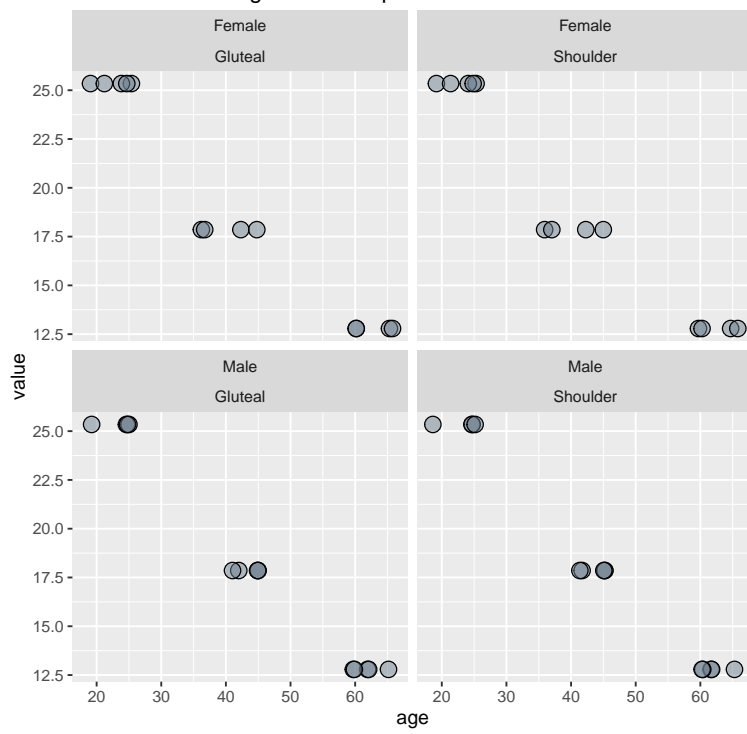

Figure 117: ReadExpSet based genewise CPM estimates  
Age related expression of FAM83G

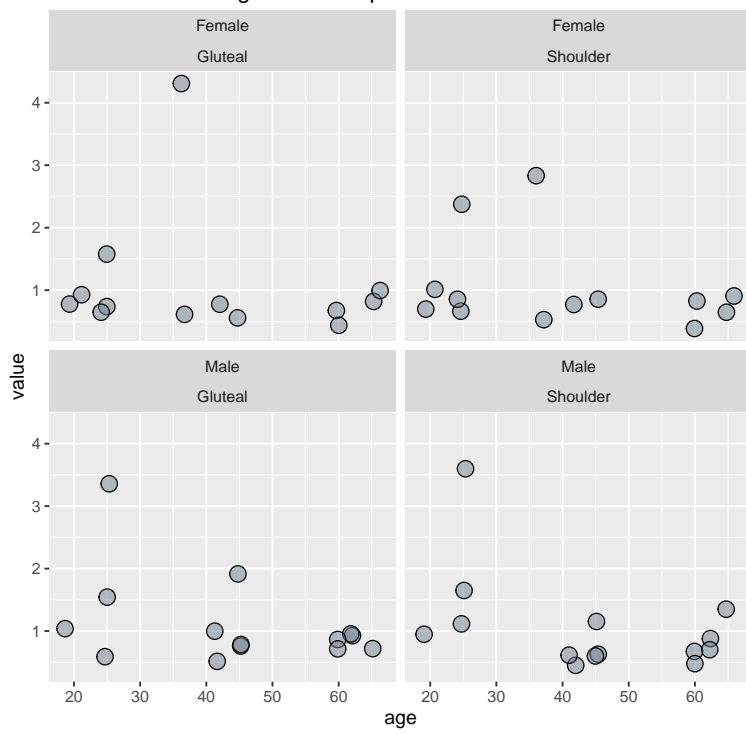

Figure 118: Loess regression for exon align depth

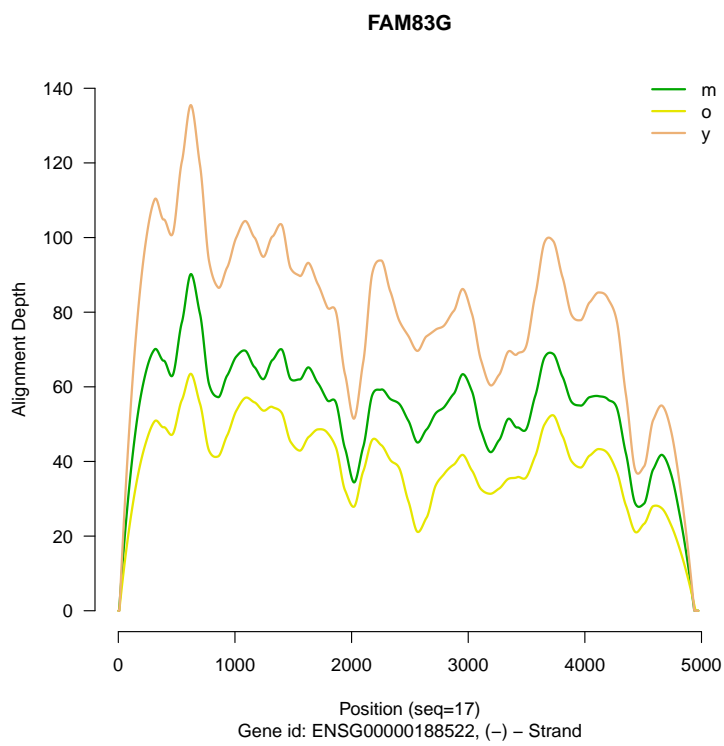

Figure 119: edgeR QLF test based CPM estimates

**Fitted read count values for gene FAM83G**

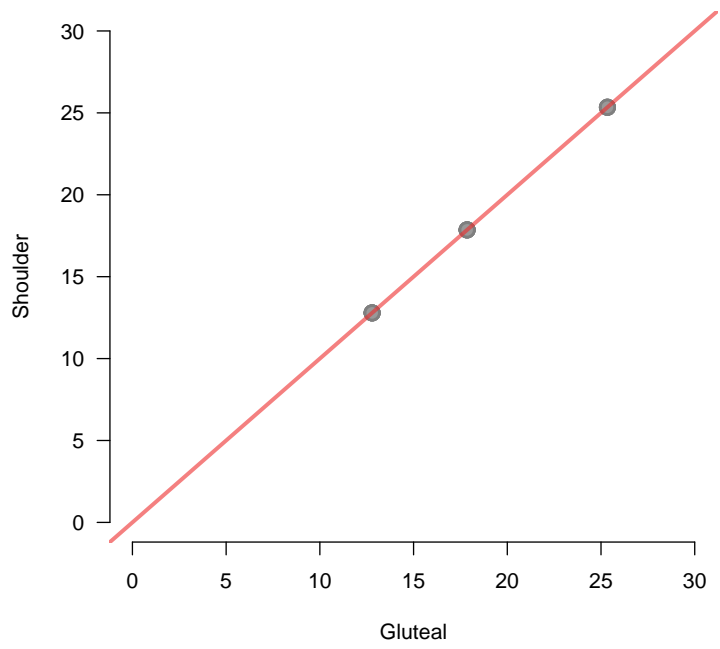

Figure 120: ReadExpSet based genewise CPM estimates

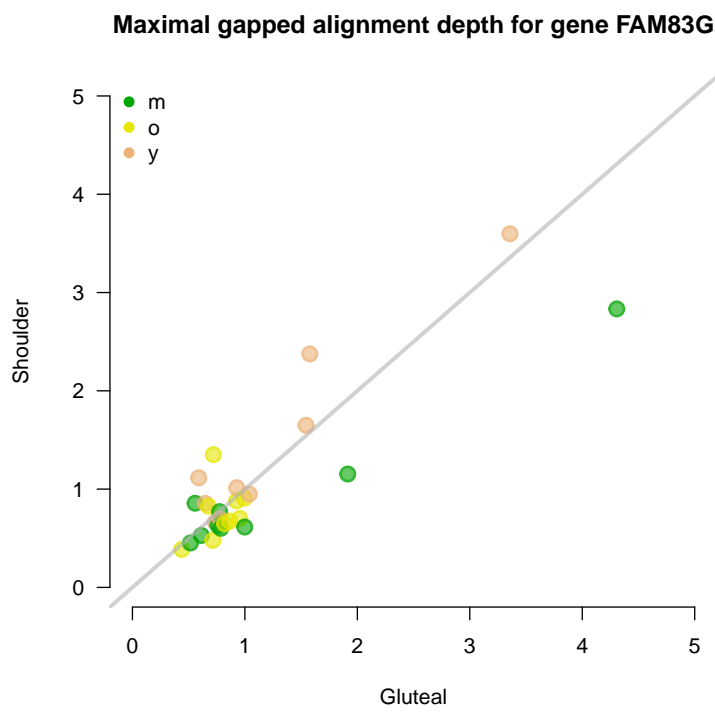

### 3.21 DDR1

| Parameter | Value                                       |
|-----------|---------------------------------------------|
| gene_name | DDR1                                        |
| gene_id   | ENSG00000204580                             |
| maxald    | 606                                         |
| old       | down                                        |
| seqid     | 6                                           |
| strand    | +                                           |
| start     | 30876421                                    |
| end       | 30900156                                    |
| descr     | discoidin domain receptor tyrosine kinase 1 |

Table 22: Gene identification

#### Gene expression estimates for Age

#### Influence of UV exposition on gene expression



Figure 121: Gene expression estimates based on CPM (SummarizeOverlaps)

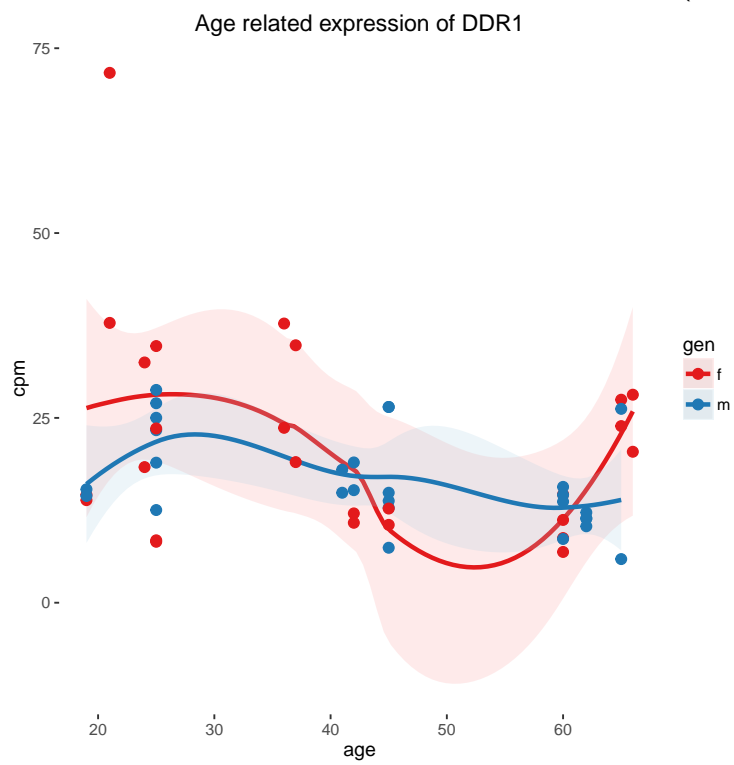

Figure 122: edgeR QLF test based CPM estimates  
Age related expression of DDR1

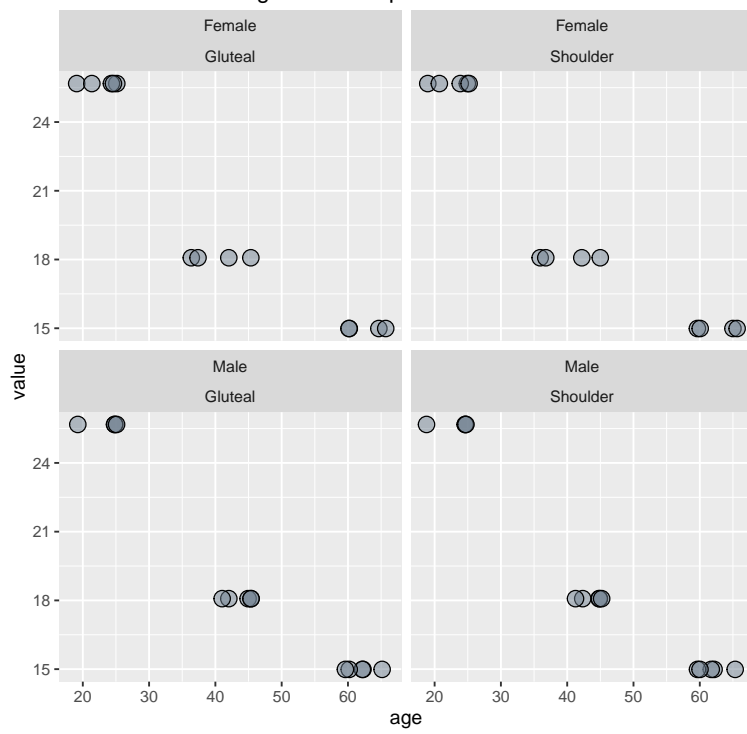

Figure 123: ReadExpSet based genewise CPM estimates  
Age related expression of DDR1

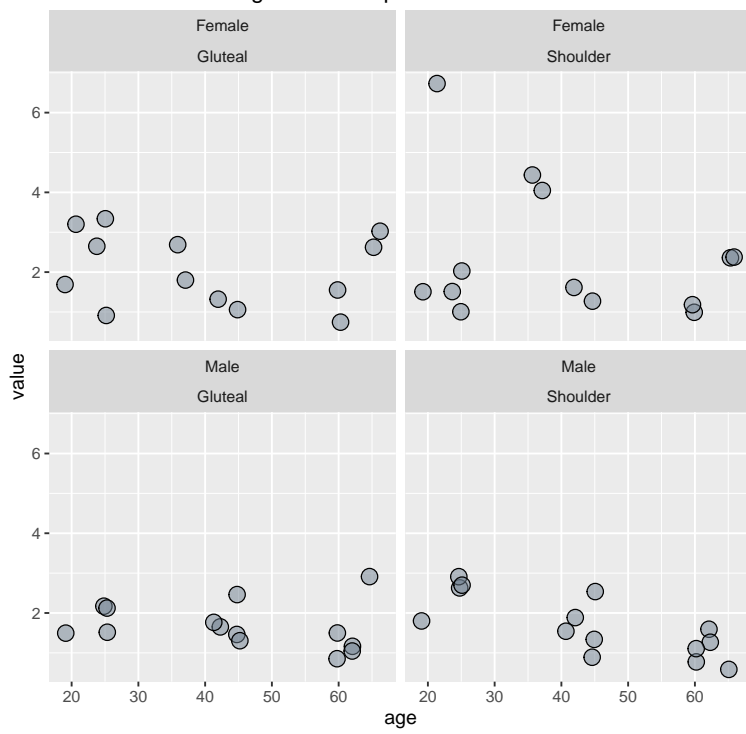

Figure 124: Loess regression for exon align depth

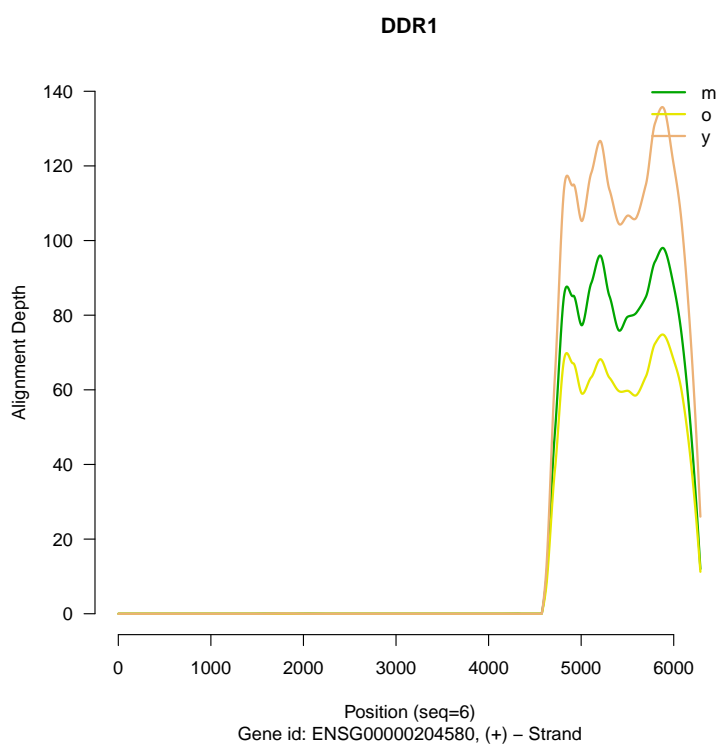

Figure 125: edgeR QLF test based CPM estimates

**Fitted read count values for gene DDR1**

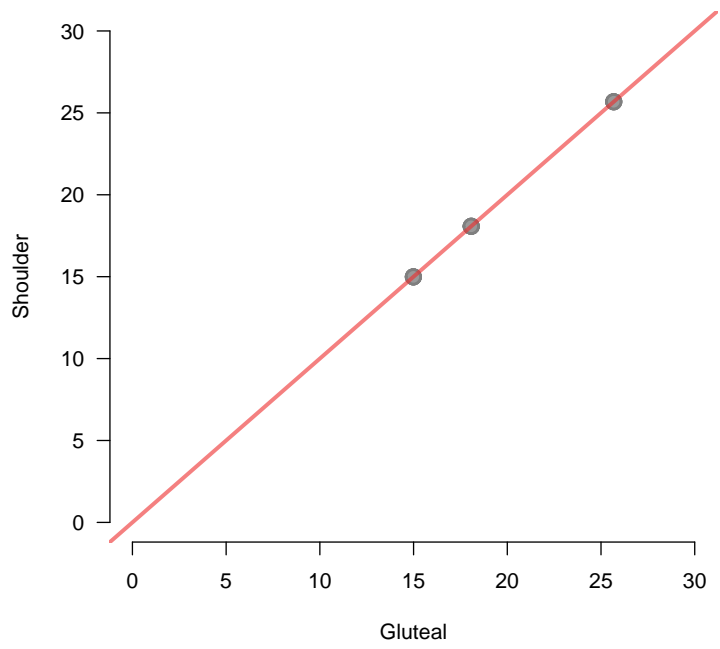

Figure 126: ReadExpSet based genewise CPM estimates

**Maximal gapped alignment depth for gene DDR1**

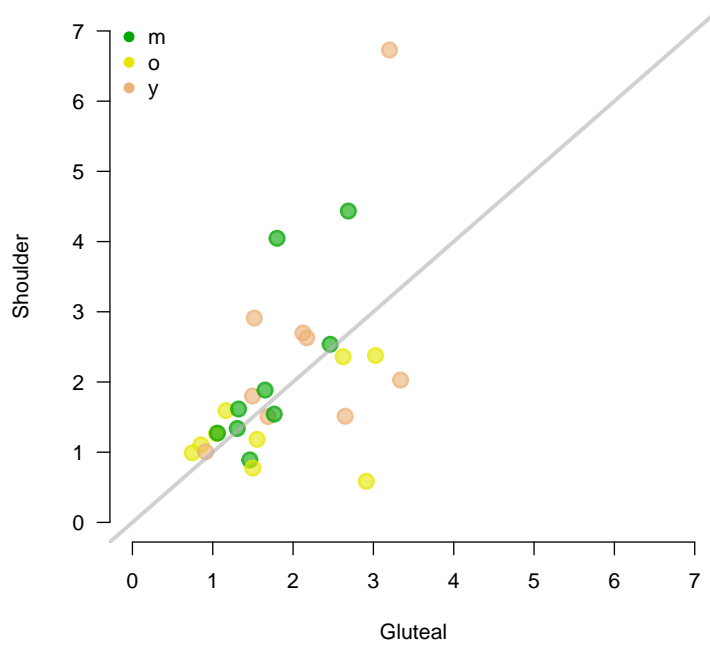

### 3.22 PPP1R3C

| Parameter | Value                                        |
|-----------|----------------------------------------------|
| gene_name | PPP1R3C                                      |
| gene_id   | ENSG00000119938                              |
| maxald    | 1889                                         |
| old       | down                                         |
| seqid     | 10                                           |
| strand    | -                                            |
| start     | 91628442                                     |
| end       | 91633054                                     |
| descr     | protein phosphatase 1, regulatory subunit 3C |

Table 23: Gene identification

#### Gene expression estimates for Age

#### Influence of UV exposition on gene expression

Figure 127: Gene expression estimates based on CPM (SummarizeOverlaps)  
Age related expression of PPP1R3C

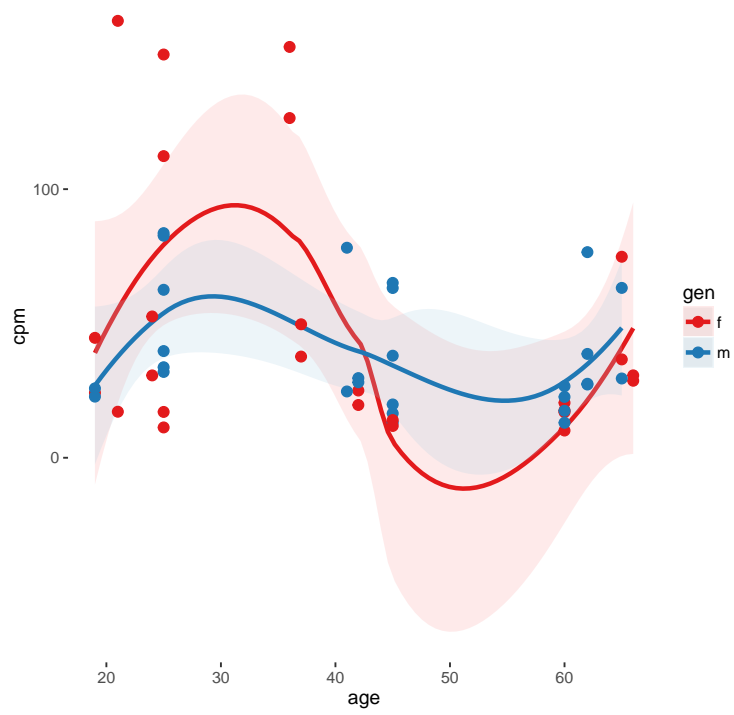



Figure 128: edgeR QLF test based CPM estimates  
Age related expression of PPP1R3C

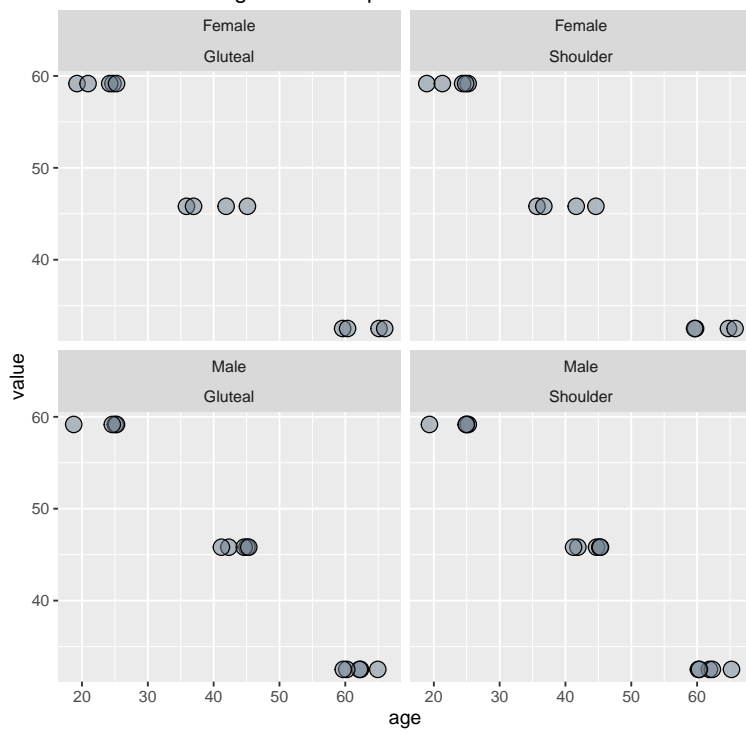

Figure 129: ReadExpSet based genewise CPM estimates  
Age related expression of PPP1R3C

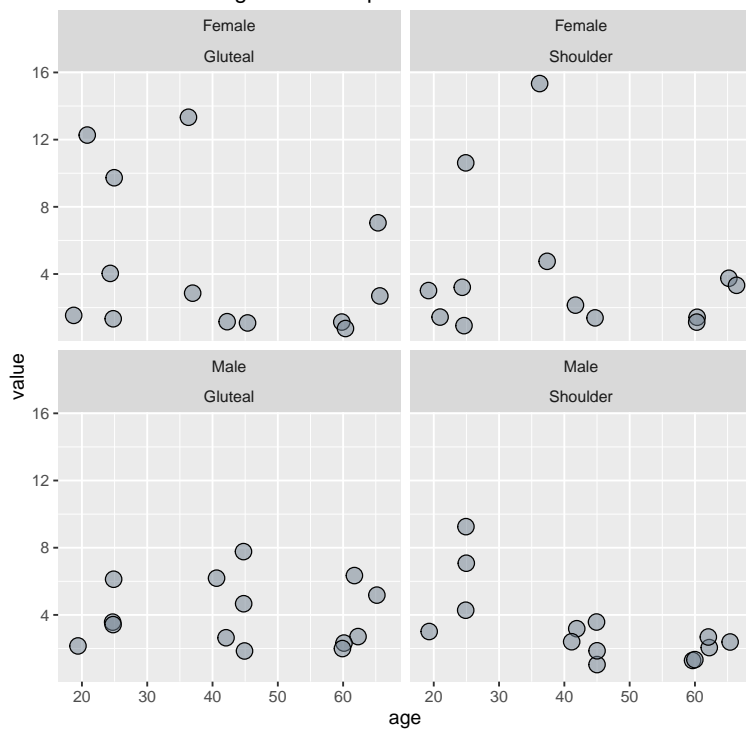

Figure 130: Loess regression for exon align depth

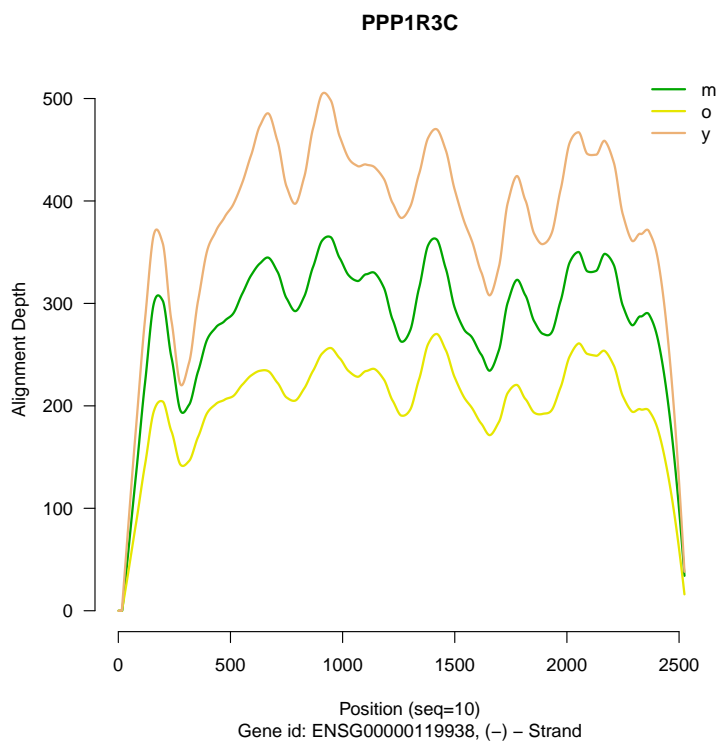

Figure 131: edgeR QLF test based CPM estimates

**Fitted read count values for gene PPP1R3C**

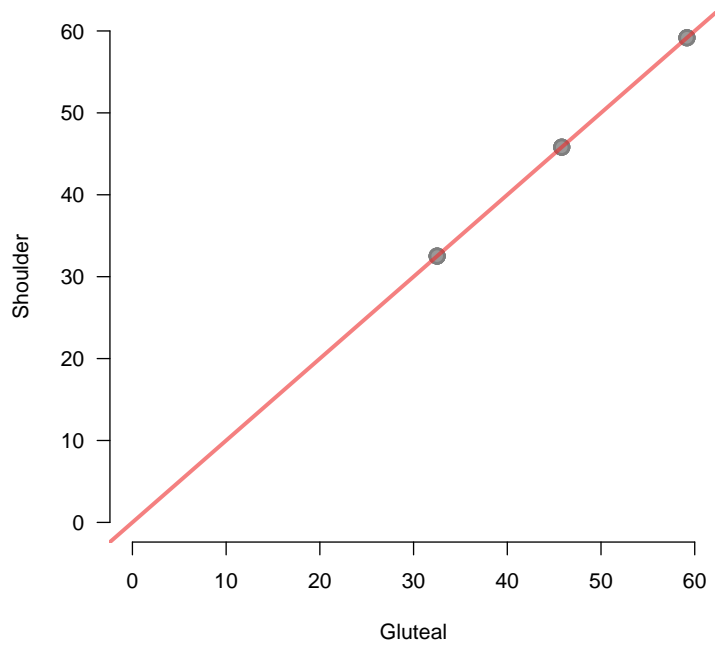

Figure 132: ReadExpSet based genewise CPM estimates

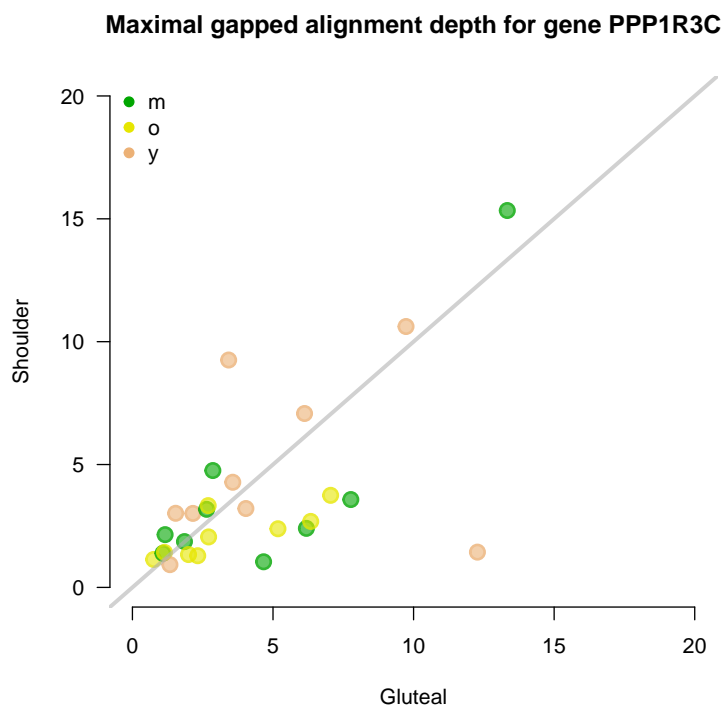

### 3.23 EVA1A

| Parameter | Value                        |
|-----------|------------------------------|
| gene_name | EVA1A                        |
| gene_id   | ENSG00000115363              |
| maxald    | 862                          |
| old       | down                         |
| seqid     | 2                            |
| strand    | -                            |
| start     | 75469302                     |
| end       | 75569722                     |
| descr     | eva-1 homolog A (C. elegans) |

Table 24: Gene identification

#### Gene expression estimates for Age

#### Influence of UV exposition on gene expression

Figure 133: Gene expression estimates based on CPM (SummarizeOverlaps)  
Age related expression of EVA1A

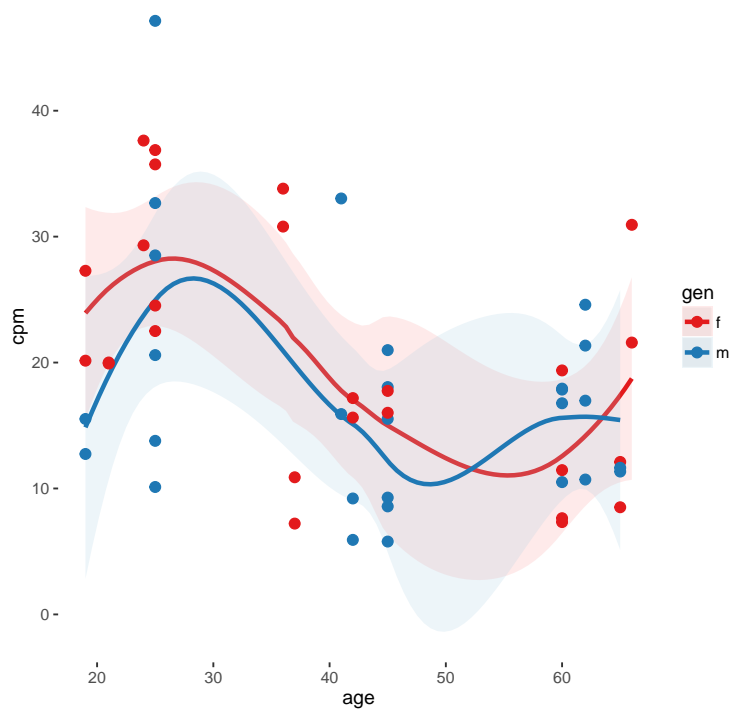

Figure 134: edgeR QLF test based CPM estimates  
Age related expression of EVA1A

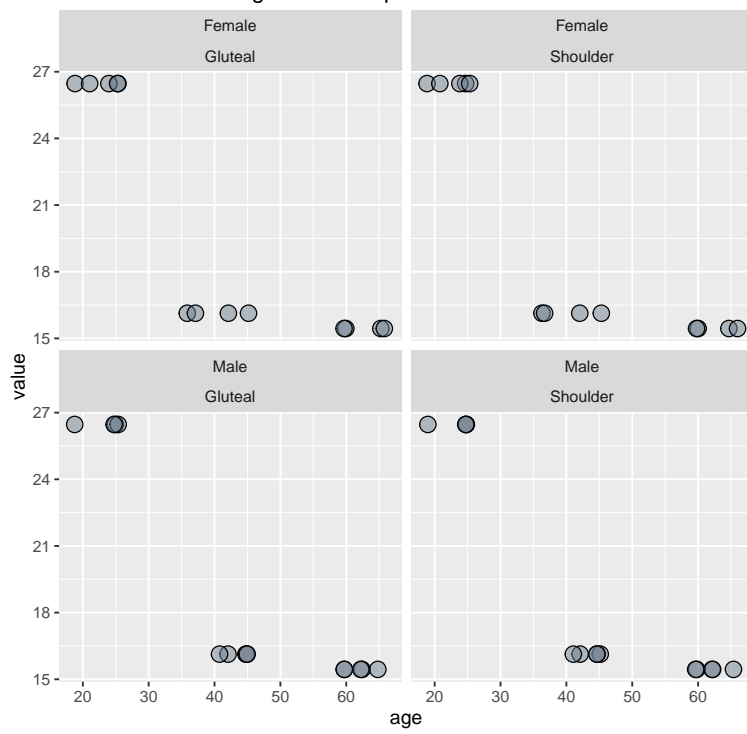



Figure 135: ReadExpSet based genewise CPM estimates  
Age related expression of EVA1A

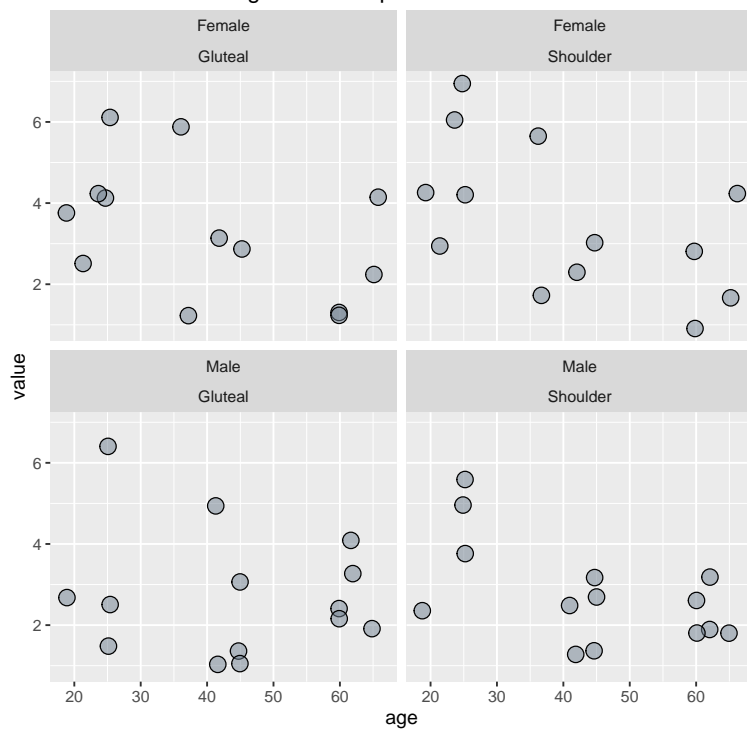

Figure 136: Loess regression for exon align depth

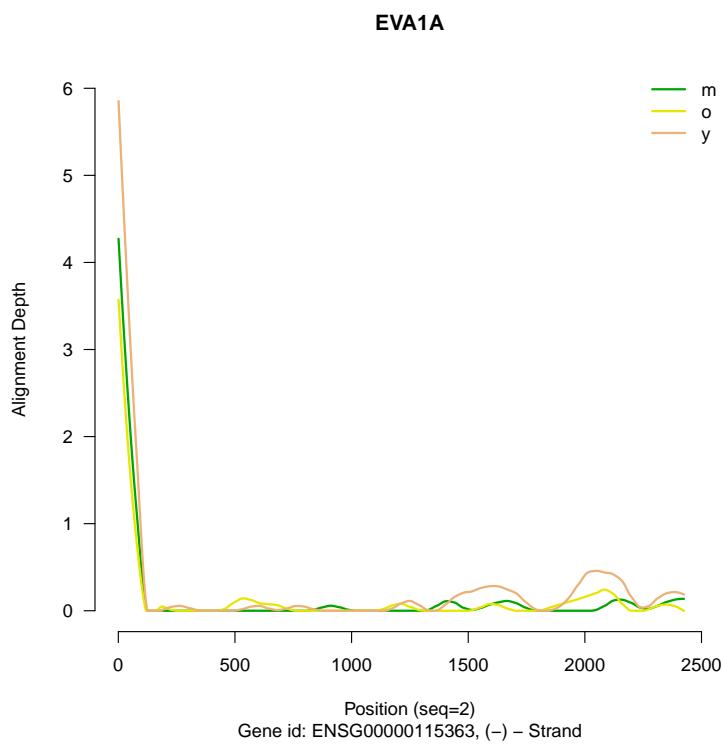

Figure 137: edgeR QLF test based CPM estimates

**Fitted read count values for gene EVA1A**

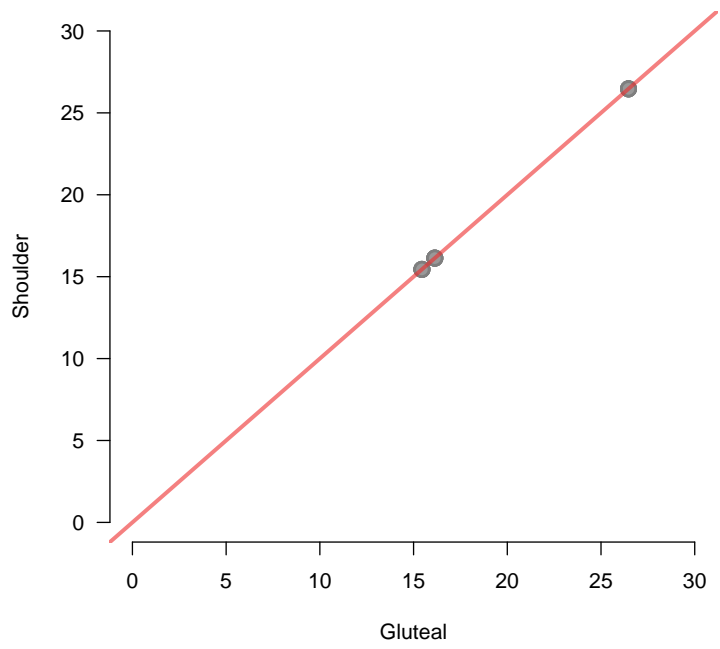

Figure 138: ReadExpSet based genewise CPM estimates

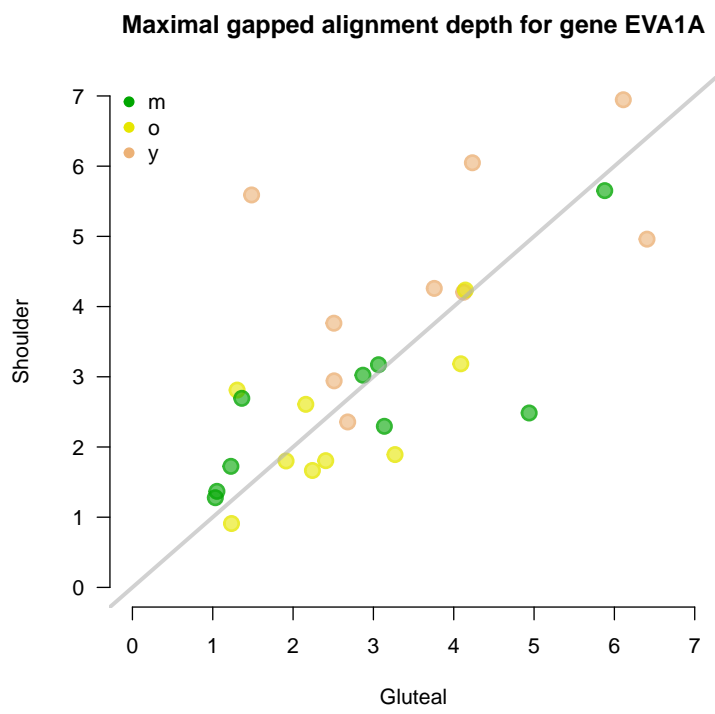

### 3.24 CRISPLD2

| Parameter | Value                                                    |
|-----------|----------------------------------------------------------|
| gene_name | CRISPLD2                                                 |
| gene_id   | ENSG00000103196                                          |
| maxald    | 2516                                                     |
| old       | down                                                     |
| seqid     | 16                                                       |
| strand    | +                                                        |
| start     | 84819984                                                 |
| end       | 84920768                                                 |
| descr     | cysteine-rich secretory protein LCCL domain containing 2 |

Table 25: Gene identification

#### Gene expression estimates for Age

#### Influence of UV exposition on gene expression

Figure 139: Gene expression estimates based on CPM (SummarizeOveraps)  
Age related expression of CRISPLD2

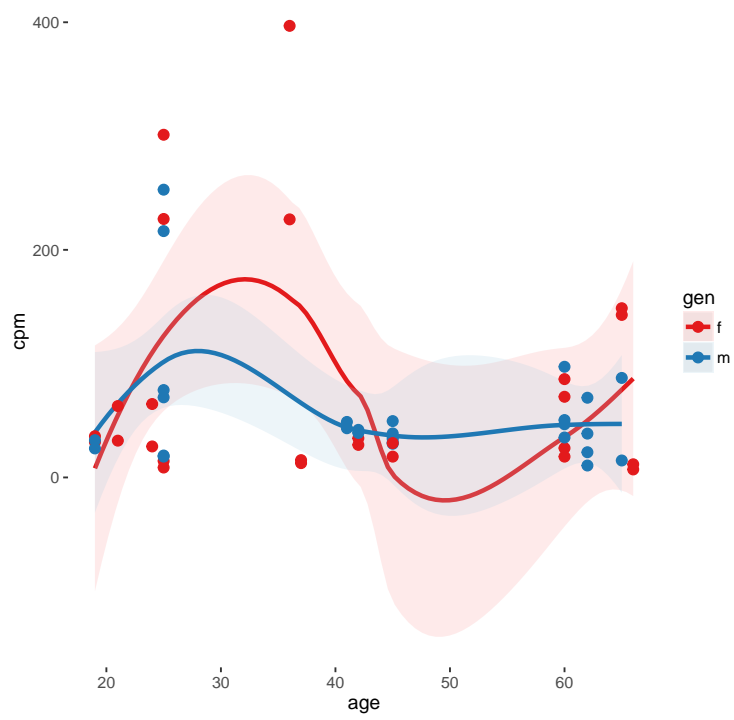

Figure 140: edgeR QLF test based CPM estimates  
Age related expression of CRISPLD2

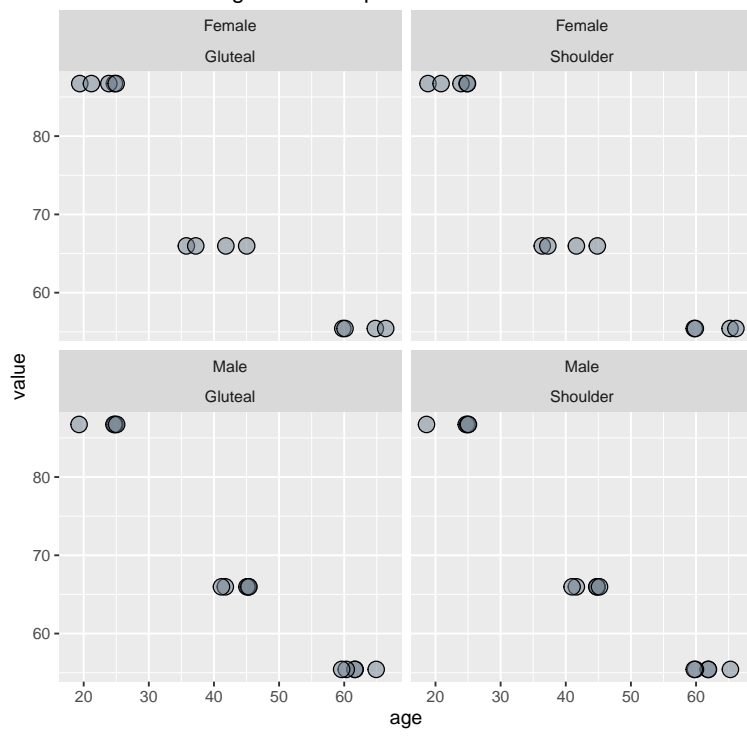

Figure 141: ReadExpSet based genewise CPM estimates  
Age related expression of CRISPLD2

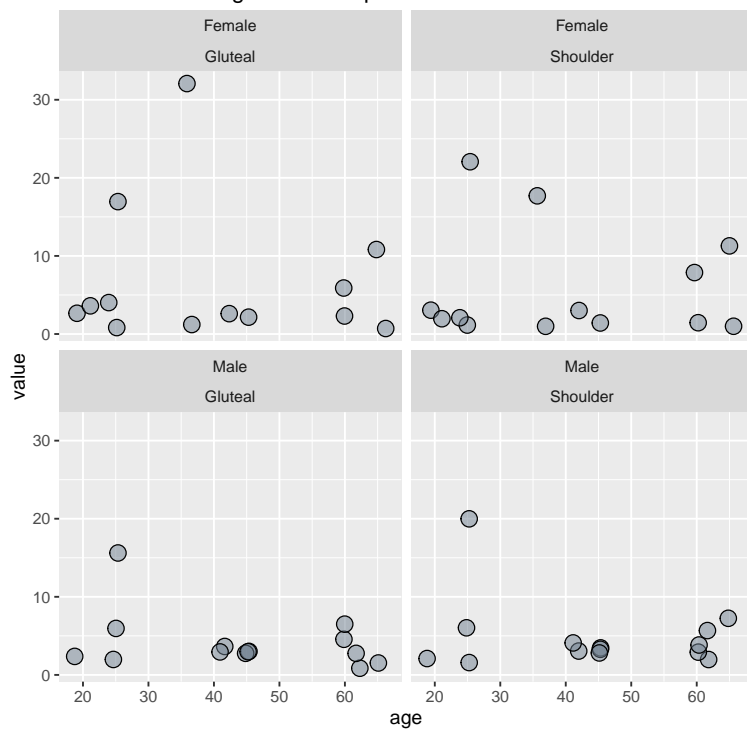



Figure 142: Loess regression for exon align depth

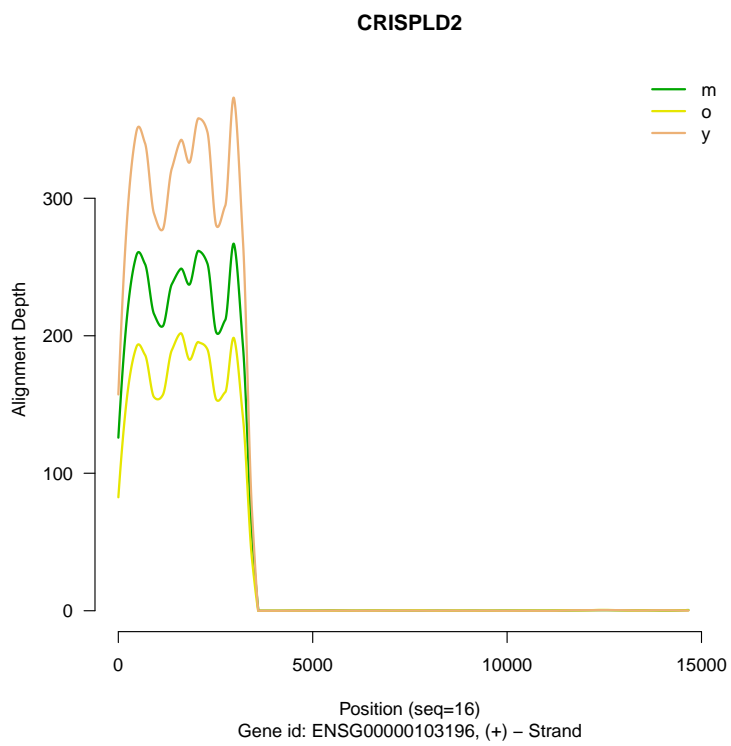

Figure 143: edgeR QLF test based CPM estimates

**Fitted read count values for gene CRISPLD2**

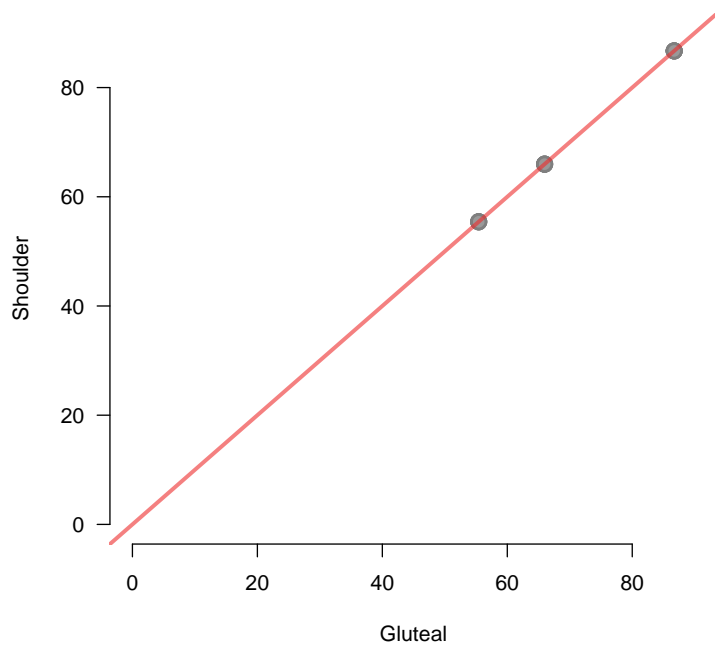

Figure 144: ReadExpSet based genewise CPM estimates

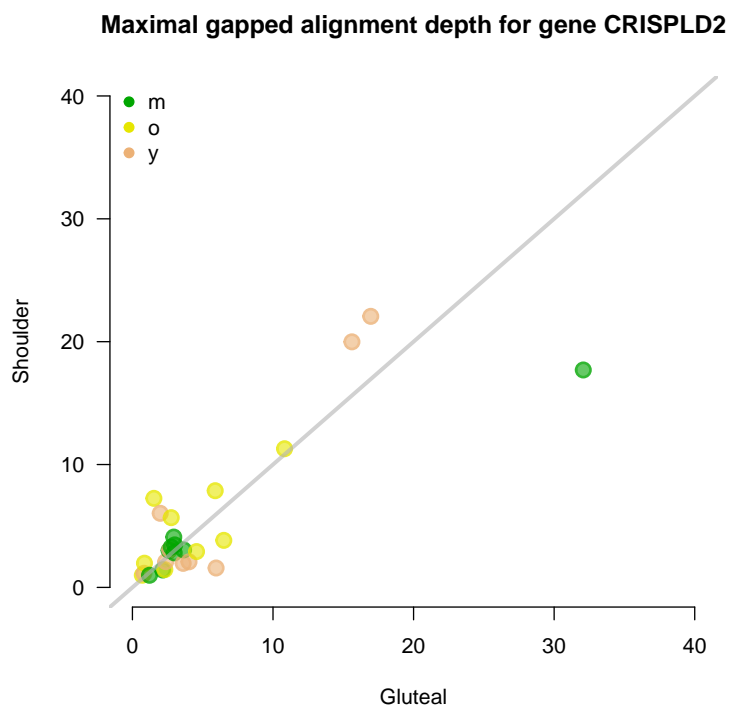

### 3.25 RP11-309L24.6

| Parameter | Value           |
|-----------|-----------------|
| gene_name | RP11-309L24.6   |
| gene_id   | ENSG00000224163 |
| maxald    | 6288            |
| old       | down            |
| seqid     | 7               |
| strand    | -               |
| start     | 128912732       |
| end       | 128914063       |
| descr     |                 |

Table 26: Gene identification

#### Gene expression estimates for Age

#### Influence of UV exposition on gene expression

Figure 145: Gene expression estimates based on CPM (SummarizeOveraps)  
Age related expression of RP11-309L24.6

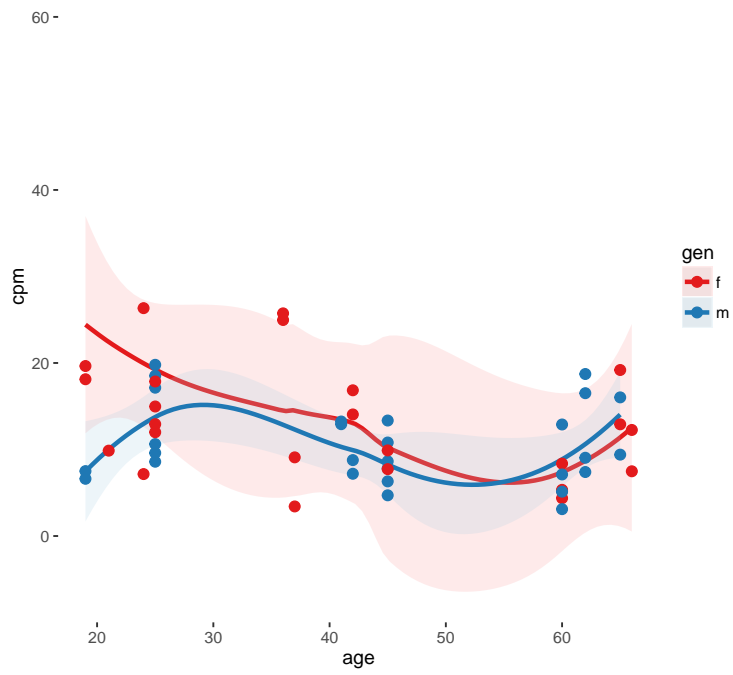

Figure 146: edgeR QLF test based CPM estimates  
Age related expression of RP11-309L24.6

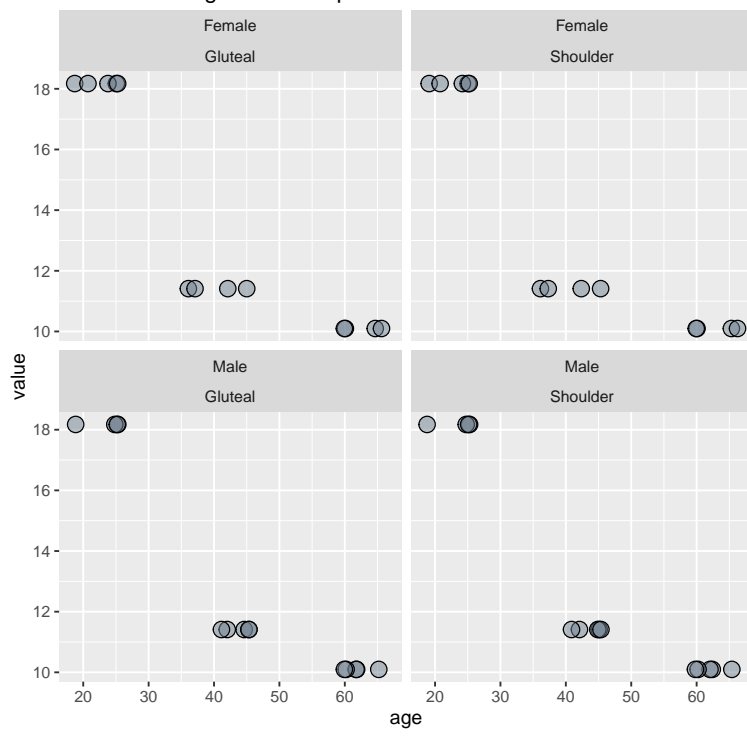

Figure 147: ReadExpSet based genewise CPM estimates  
Age related expression of RP11-309L24.6

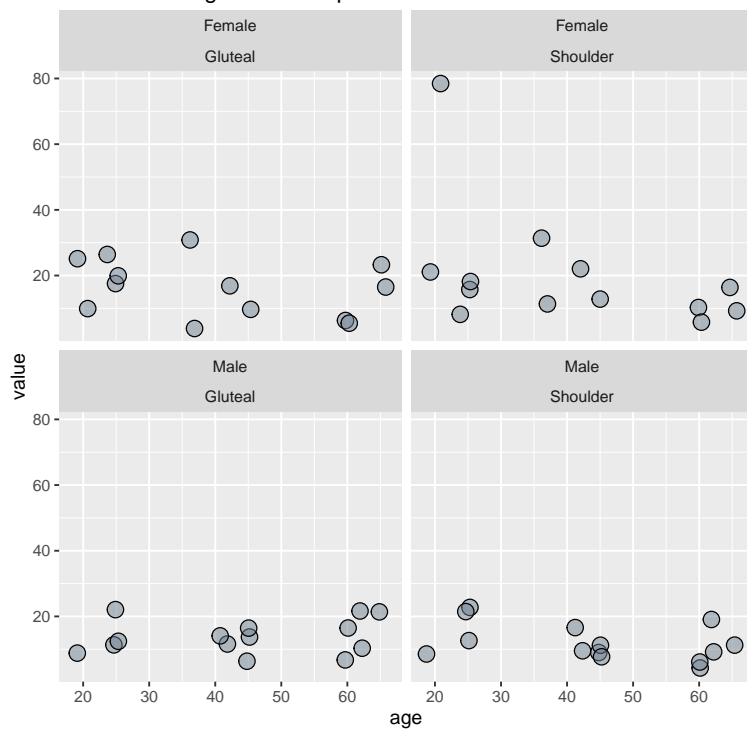

Figure 148: Loess regression for exon align depth

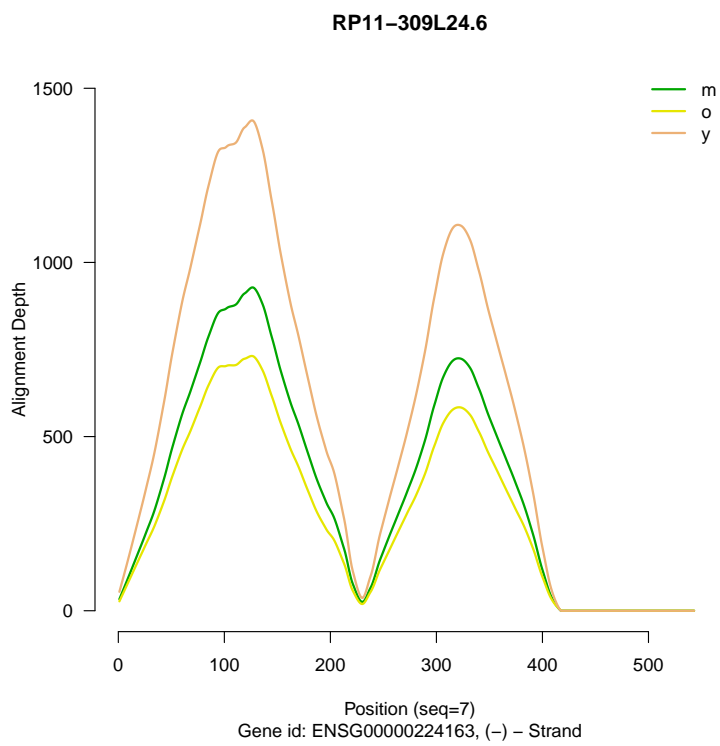



Figure 149: edgeR QLF test based CPM estimates

**Fitted read count values for gene RP11-309L24.6**

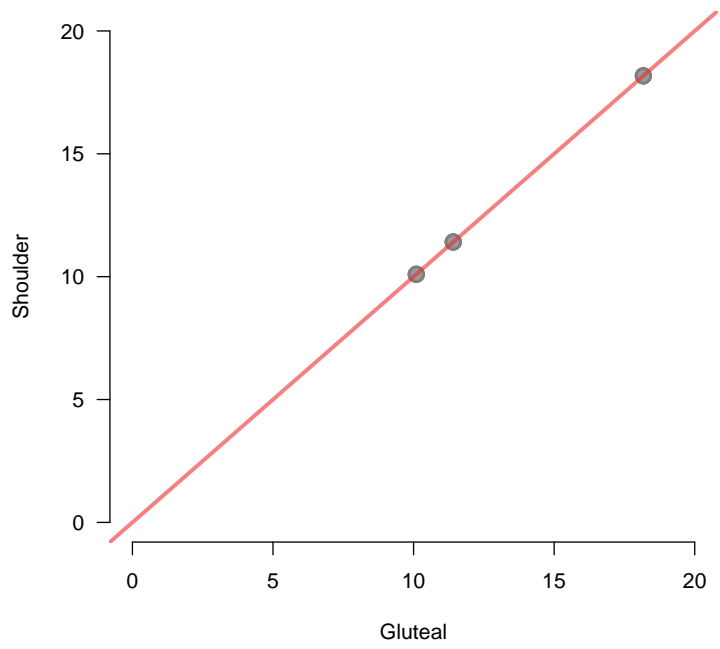

Figure 150: ReadExpSet based genewise CPM estimates

**Maximal gapped alignment depth for gene RP11-309L24.6**

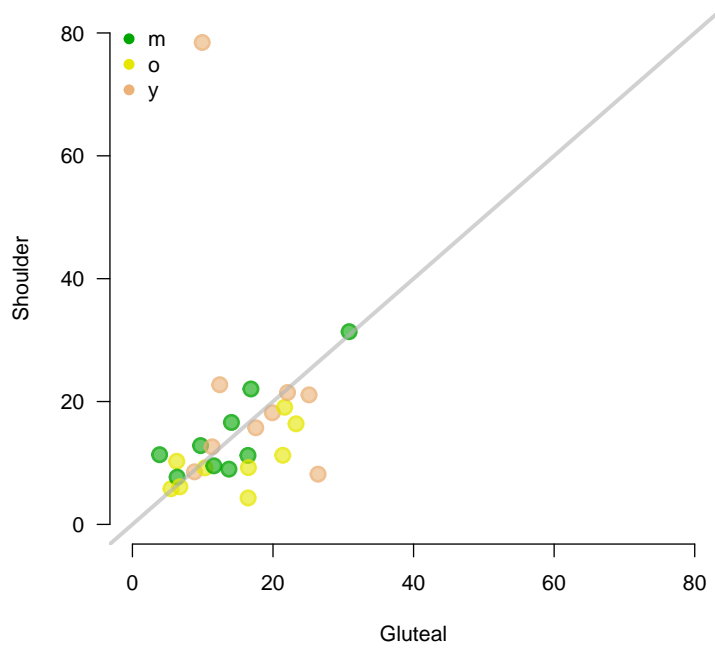

### 3.26 ZNF385D

| Parameter | Value                    |
|-----------|--------------------------|
| gene_name | ZNF385D                  |
| gene_id   | ENSG00000151789          |
| maxald    | 529                      |
| old       | up                       |
| seqid     | 3                        |
| strand    | -                        |
| start     | 21415071                 |
| end       | 22373321                 |
| descr     | zinc finger protein 385D |

Table 27: Gene identification

#### Gene expression estimates for Age

#### Influence of UV exposition on gene expression

Figure 151: Gene expression estimates based on CPM (SummarizeOverlaps)  
Age related expression of ZNF385D

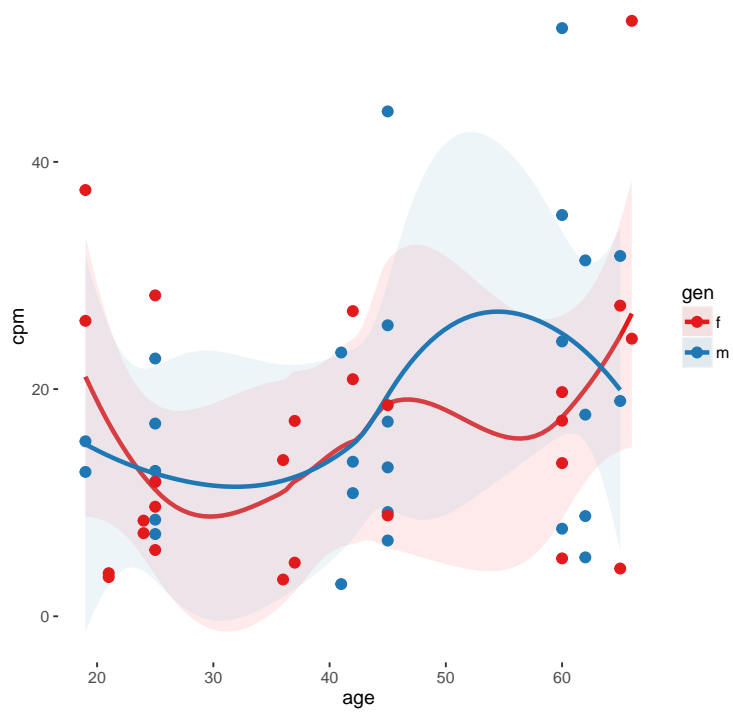

Figure 152: edgeR QLF test based CPM estimates  
Age related expression of ZNF385D

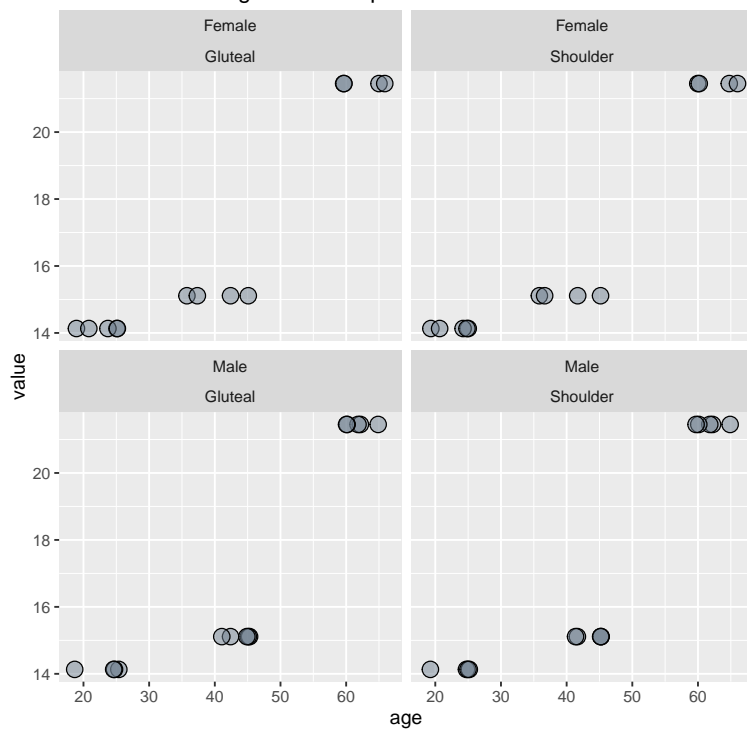

Figure 153: ReadExpSet based genewise CPM estimates  
Age related expression of ZNF385D

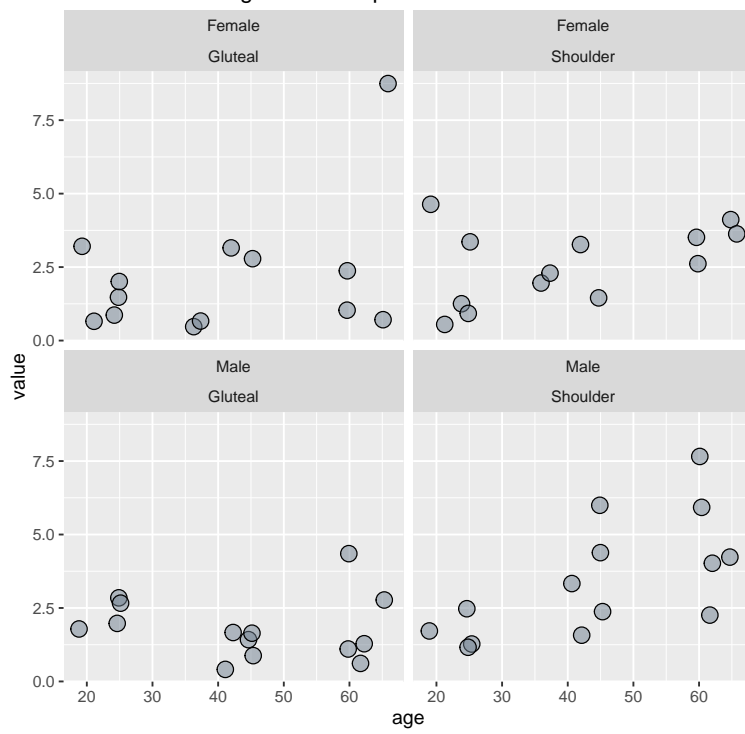

Figure 154: Loess regression for exon align depth

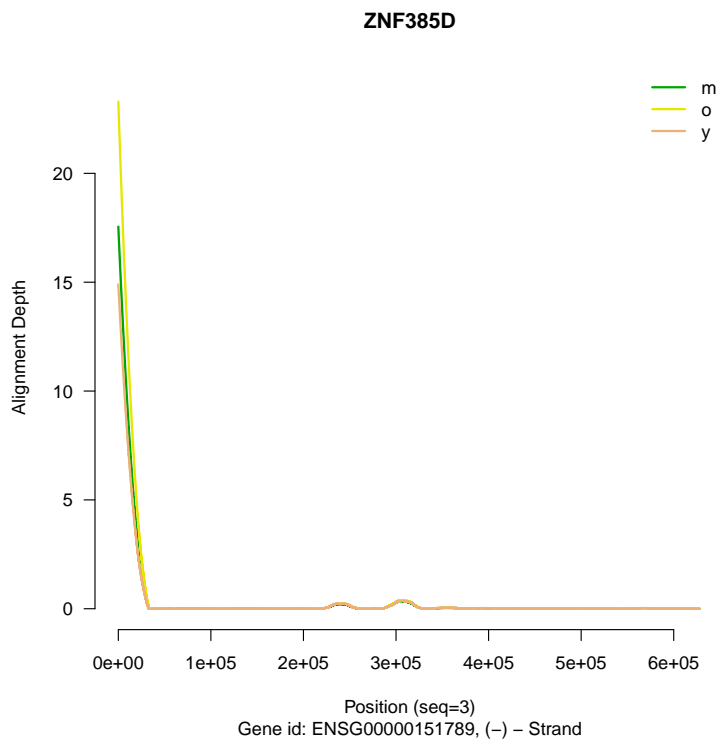

Figure 155: edgeR QLF test based CPM estimates

**Fitted read count values for gene ZNF385D**

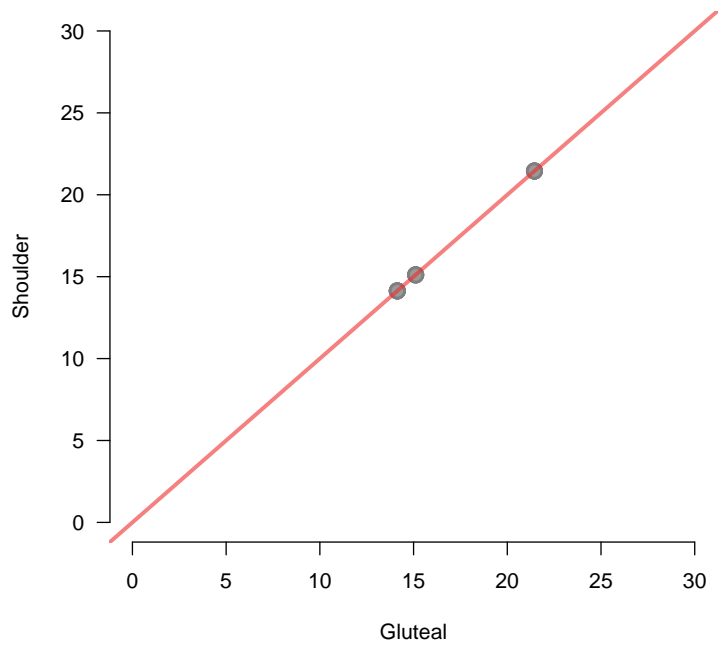



Figure 156: ReadExpSet based genewise CPM estimates

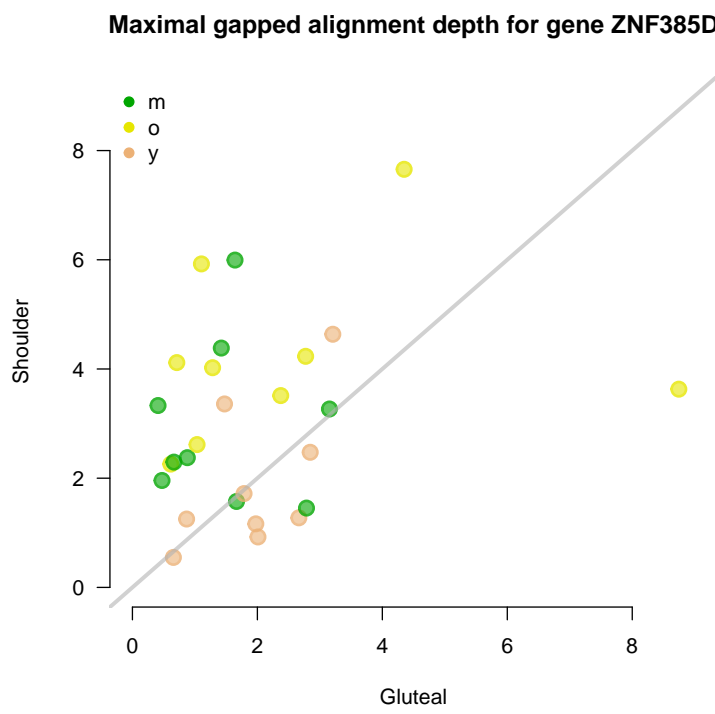

### 3.27 FGFRL1

| Parameter | Value                                    |
|-----------|------------------------------------------|
| gene_name | FGFRL1                                   |
| gene_id   | ENSG00000127418                          |
| maxald    | 1174                                     |
| old       | down                                     |
| seqid     | 4                                        |
| strand    | +                                        |
| start     | 1009936                                  |
| end       | 1026897                                  |
| descr     | fibroblast growth factor receptor-like 1 |

Table 28: Gene identification

#### Gene expression estimates for Age

#### Influence of UV exposition on gene expression

Figure 157: Gene expression estimates based on CPM (SummarizeOverlaps)  
Age related expression of FGFR1

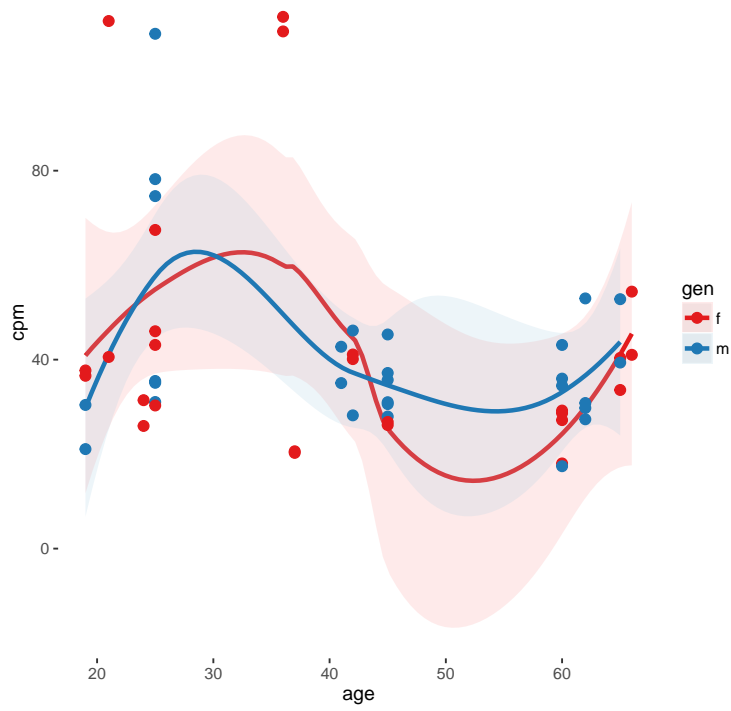

Figure 158: edgeR QLF test based CPM estimates  
Age related expression of FGFR1

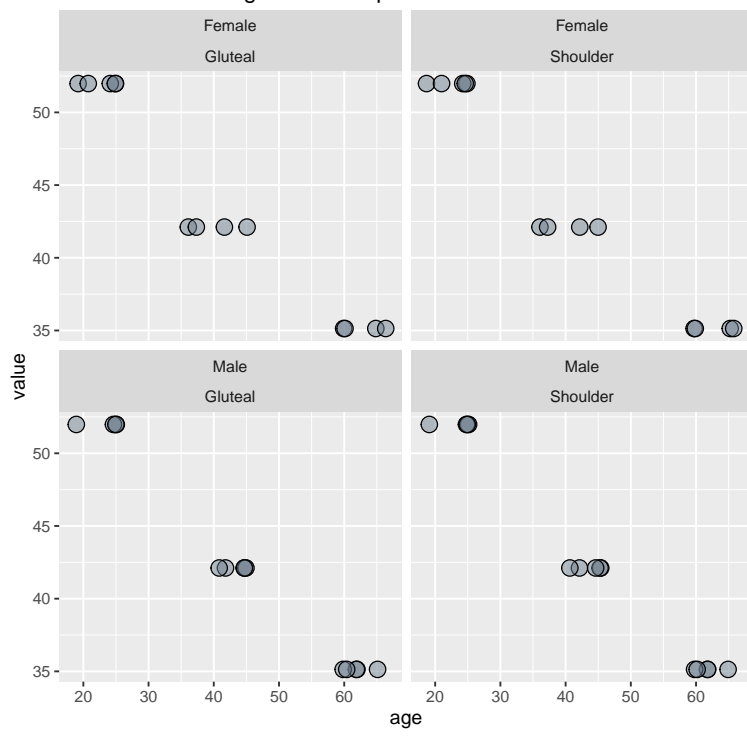

Figure 159: ReadExpSet based genewise CPM estimates  
Age related expression of FGFR1

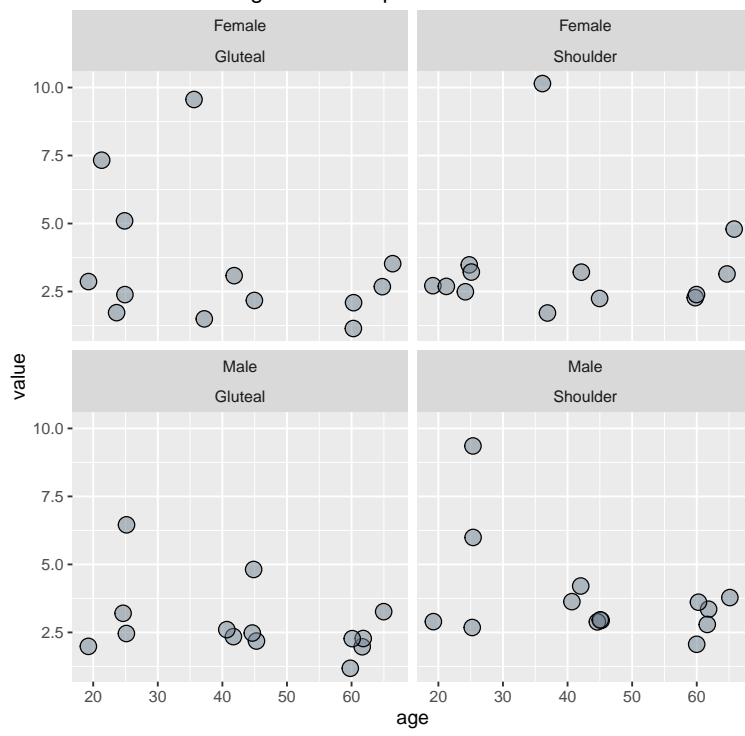

Figure 160: Loess regression for exon align depth

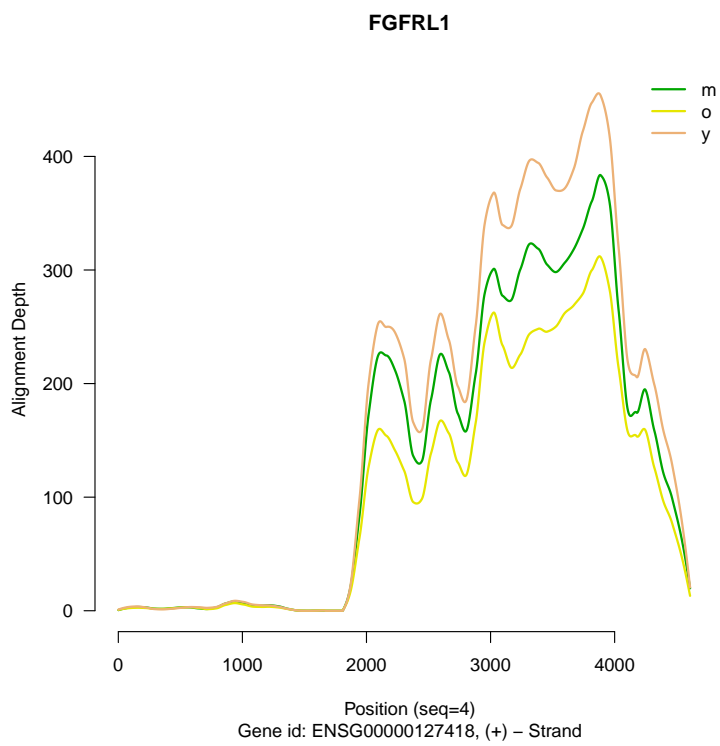

Figure 161: edgeR QLF test based CPM estimates

**Fitted read count values for gene FGRL1**

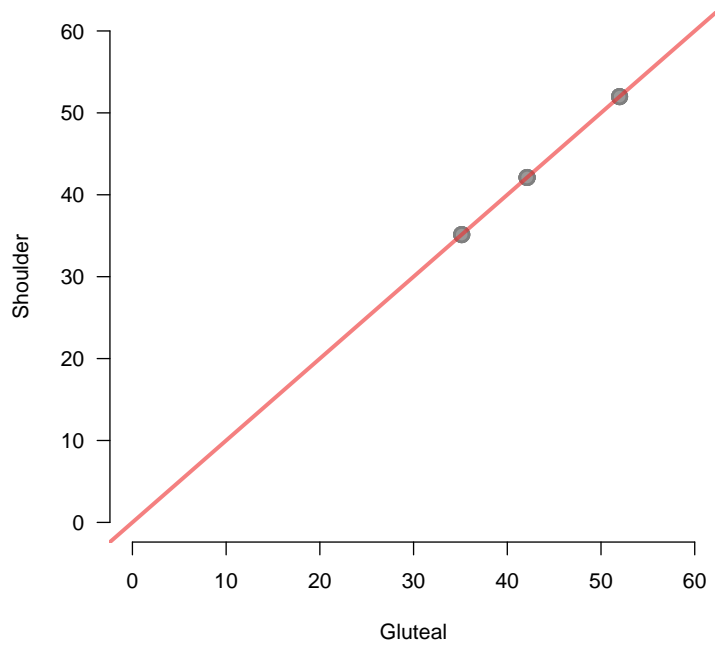

Figure 162: ReadExpSet based genewise CPM estimates

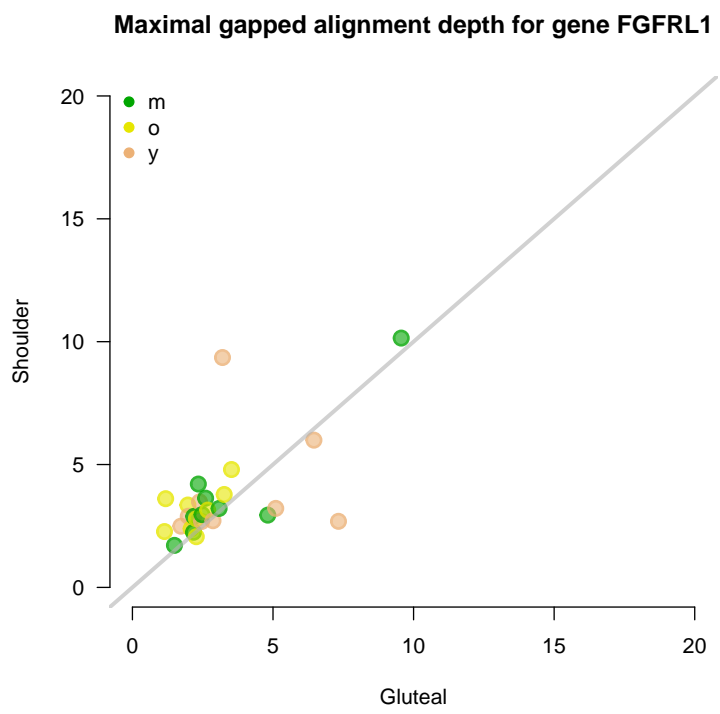



### 3.28 CKB

| Parameter | Value                  |
|-----------|------------------------|
| gene_name | CKB                    |
| gene_id   | ENSG00000166165        |
| maxald    | 2224                   |
| old       | down                   |
| seqid     | 14                     |
| strand    | -                      |
| start     | 103519659              |
| end       | 103523111              |
| descr     | creatine kinase, brain |

Table 29: Gene identification

#### Gene expression estimates for Age

#### Influence of UV exposition on gene expression

Figure 163: Gene expression estimates based on CPM (SummarizeOverlaps)

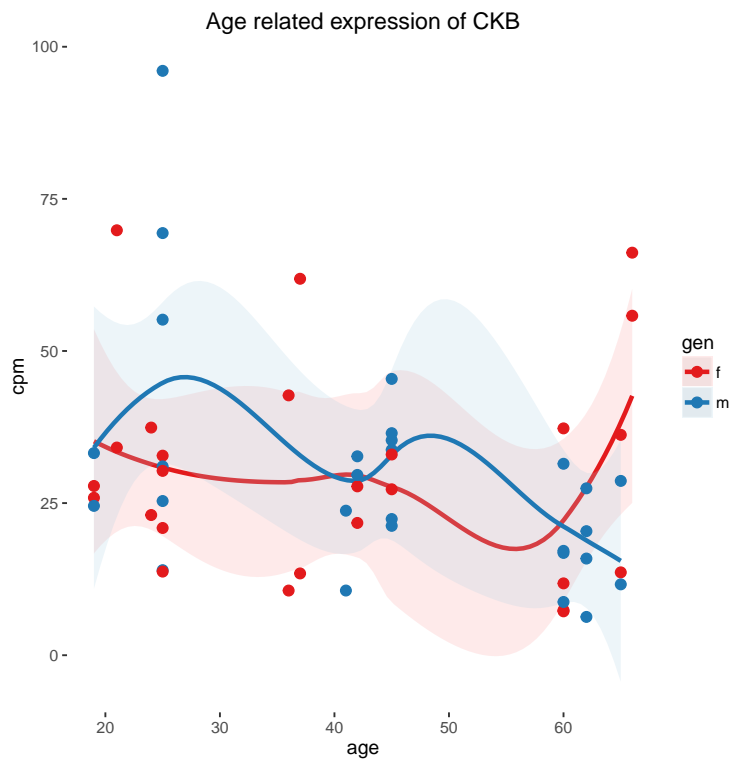

Figure 164: edgeR QLF test based CPM estimates  
Age related expression of CKB

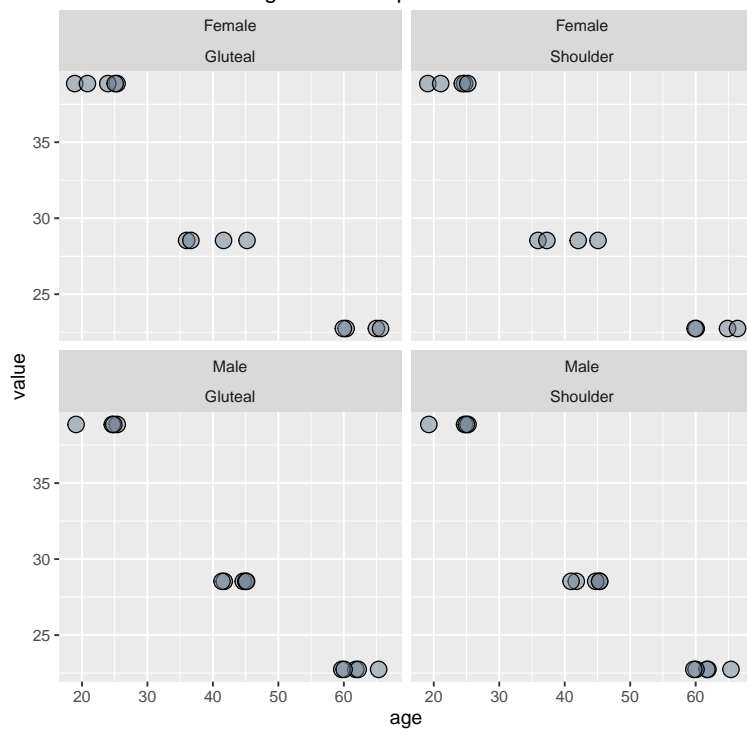

Figure 165: ReadExpSet based genewise CPM estimates  
Age related expression of CKB

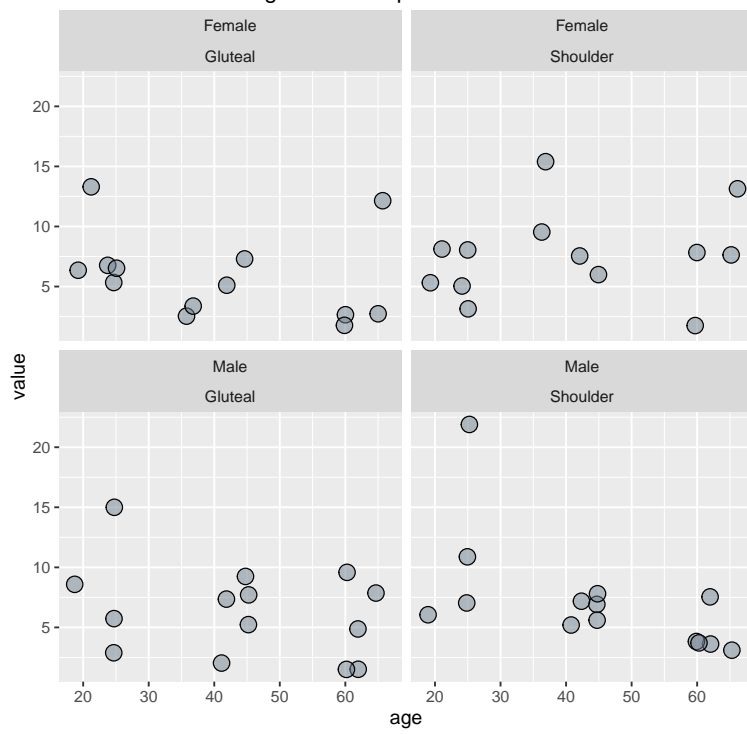

Figure 166: Loess regression for exon align depth

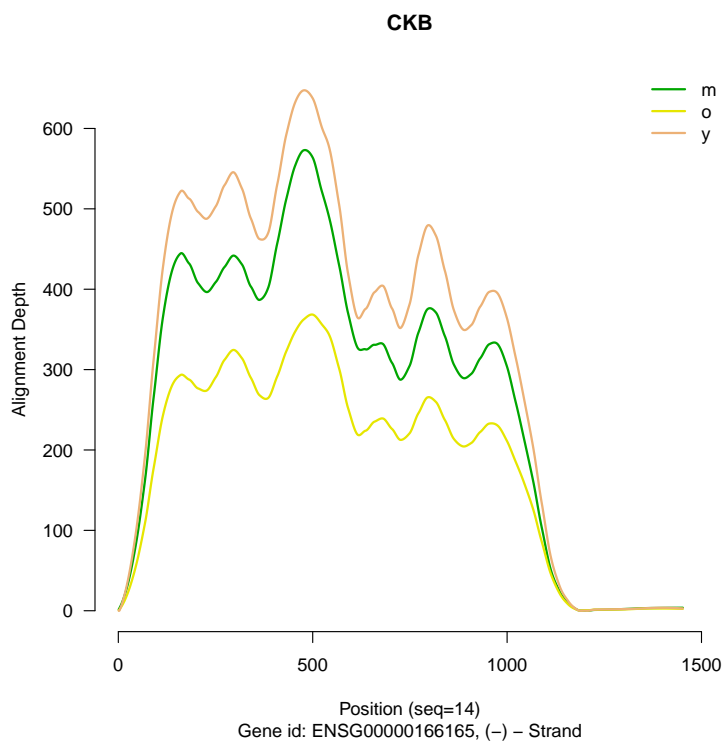

Figure 167: edgeR QLF test based CPM estimates

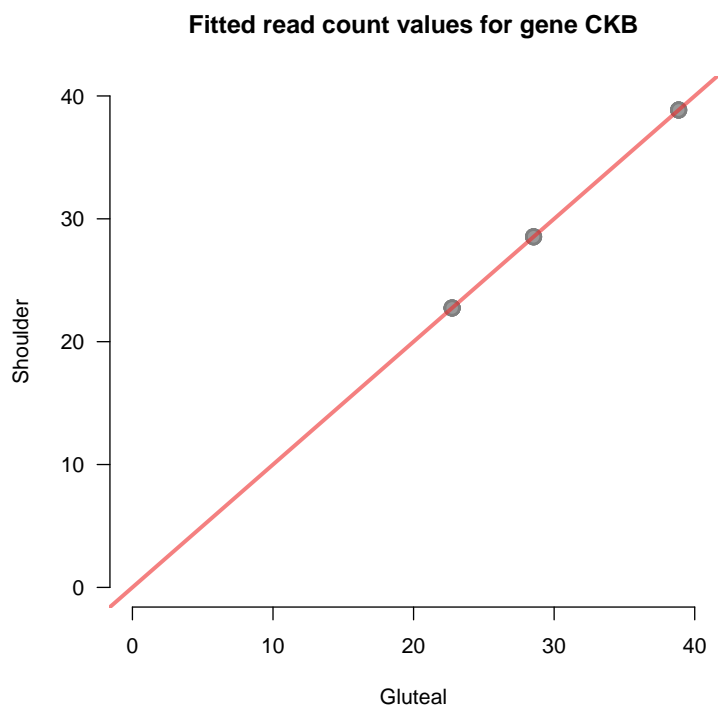

Figure 168: ReadExpSet based genewise CPM estimates

**Maximal gapped alignment depth for gene CKB**

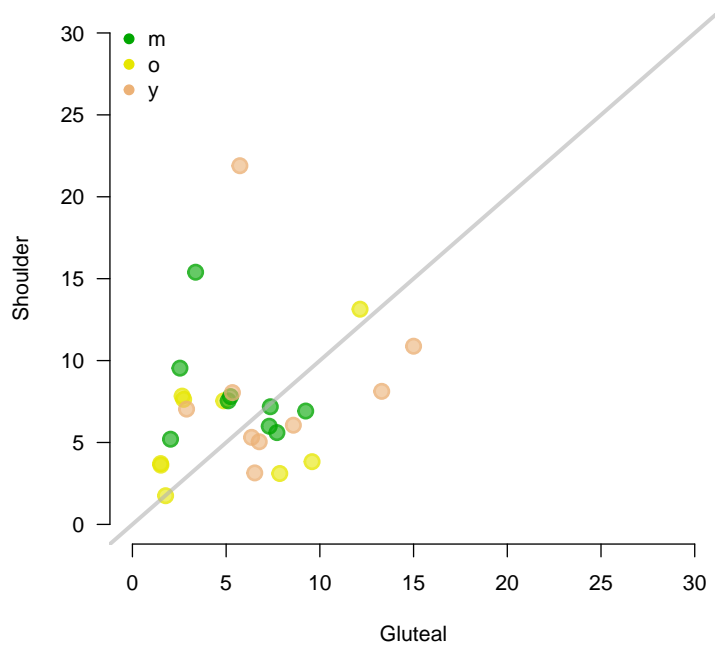

### 3.29 FILIP1L

| Parameter | Value                                |
|-----------|--------------------------------------|
| gene_name | FILIP1L                              |
| gene_id   | ENSG00000168386                      |
| maxald    | 2028                                 |
| old       | down                                 |
| seqid     | 3                                    |
| strand    | -                                    |
| start     | 99830141                             |
| end       | 100114513                            |
| descr     | filamin A interacting protein 1-like |

Table 30: Gene identification

#### Gene expression estimates for Age

#### Influence of UV exposition on gene expression



Figure 169: Gene expression estimates based on CPM (SummarizeOveraps)  
Age related expression of FILIP1L

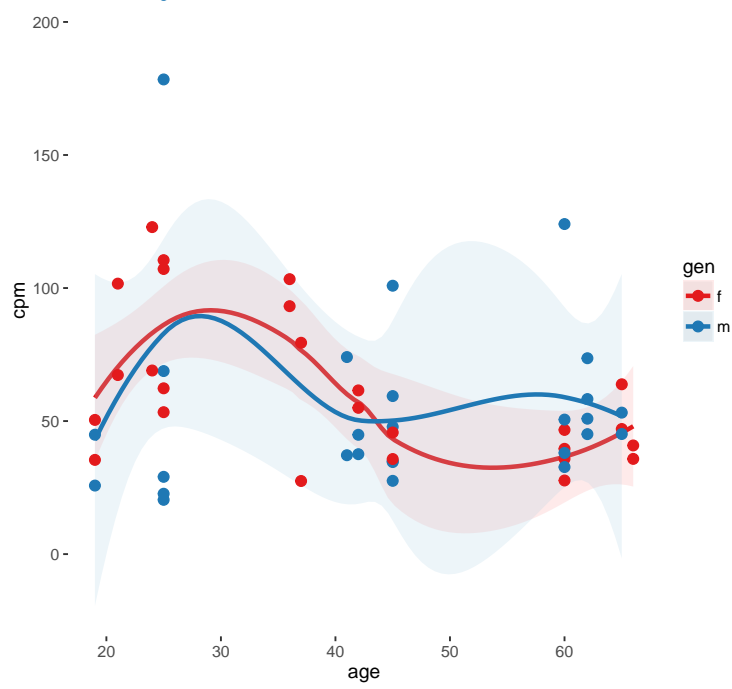

Figure 170: edgeR QLF test based CPM estimates  
Age related expression of FILIP1L

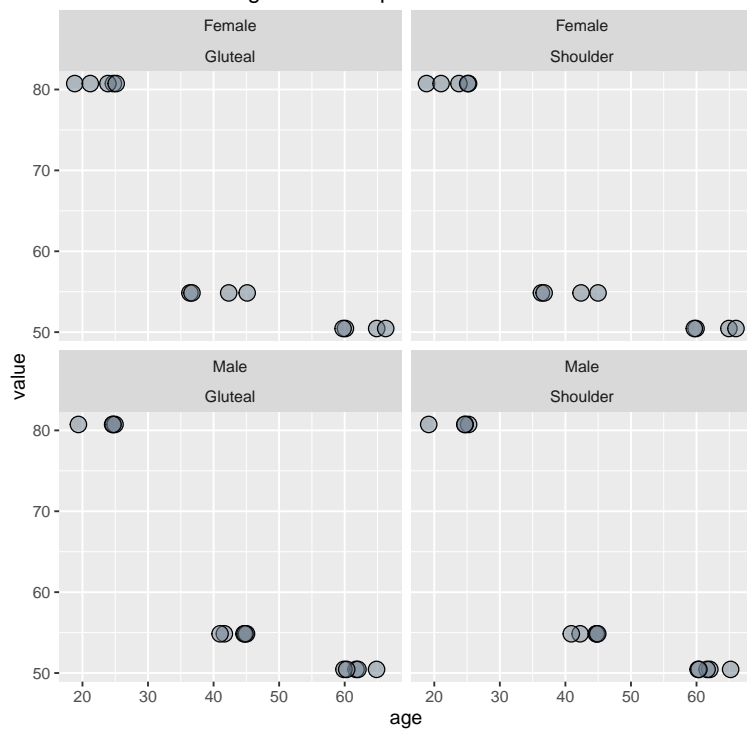

Figure 171: ReadExpSet based genewise CPM estimates  
Age related expression of FILIP1L

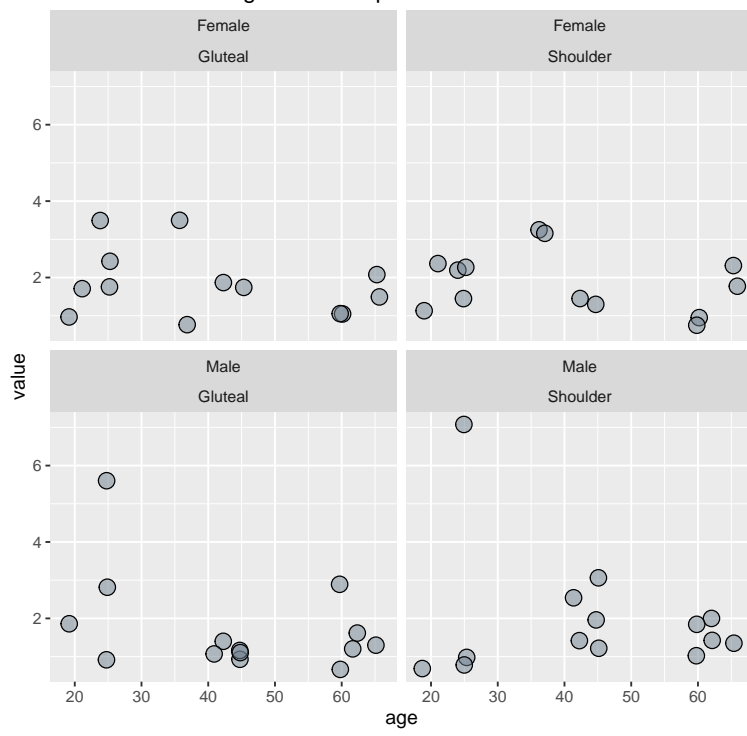

Figure 172: Loess regression for exon align depth

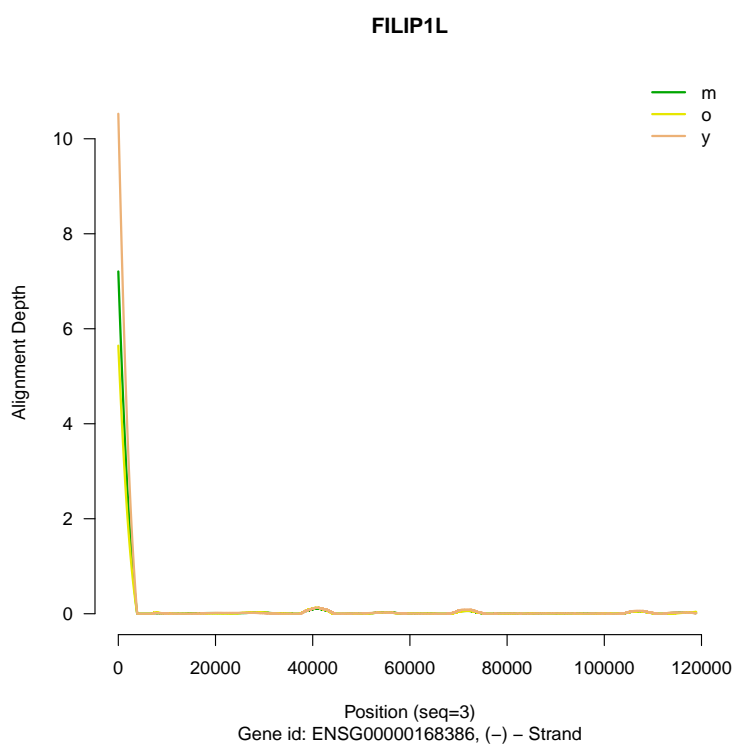

Figure 173: edgeR QLF test based CPM estimates

**Fitted read count values for gene FILIP1L**

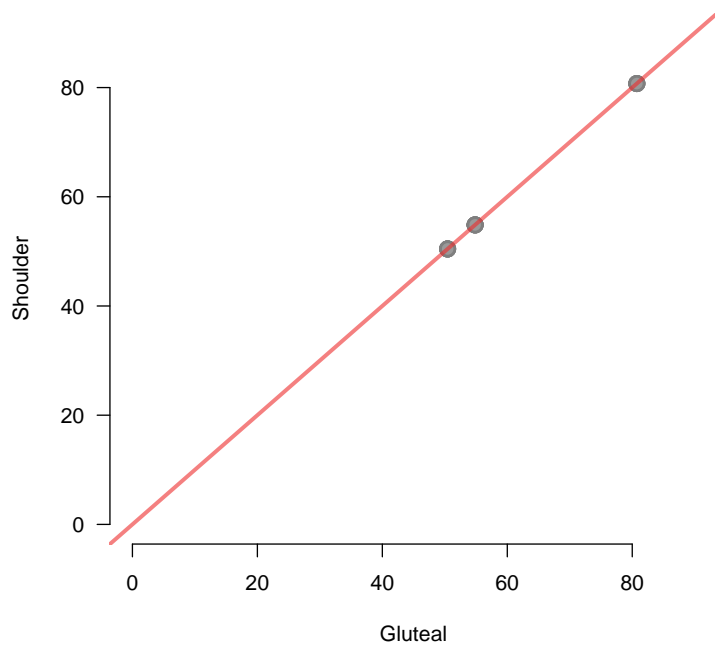

Figure 174: ReadExpSet based genewise CPM estimates

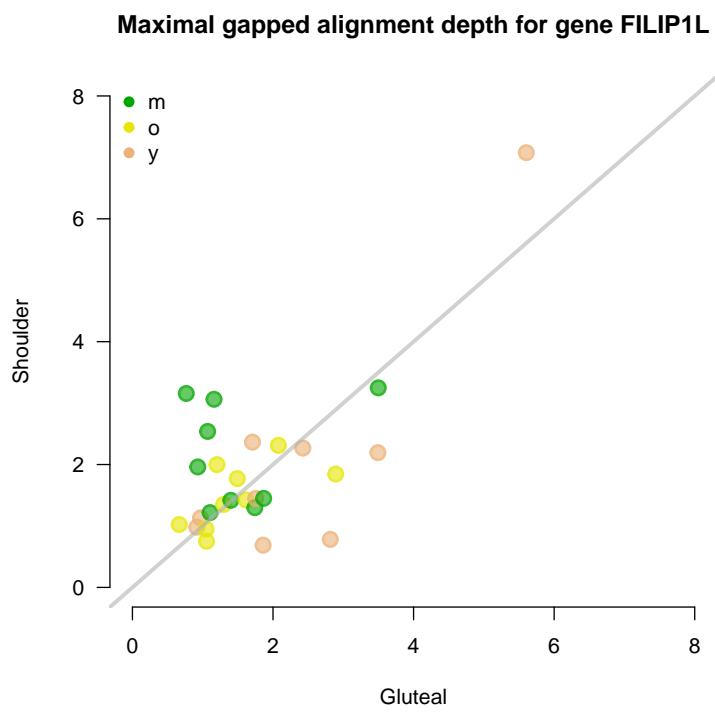

### 3.30 GJA1

| Parameter | Value                                |
|-----------|--------------------------------------|
| gene_name | GJA1                                 |
| gene_id   | ENSG00000152661                      |
| maxald    | 12333                                |
| old       | up                                   |
| seqid     | 6                                    |
| strand    | +                                    |
| start     | 121435692                            |
| end       | 121449727                            |
| descr     | gap junction protein, alpha 1, 43kDa |

Table 31: Gene identification

#### Gene expression estimates for Age

#### Influence of UV exposition on gene expression

Figure 175: Gene expression estimates based on CPM (SummarizeOverlaps)  
Age related expression of GJA1

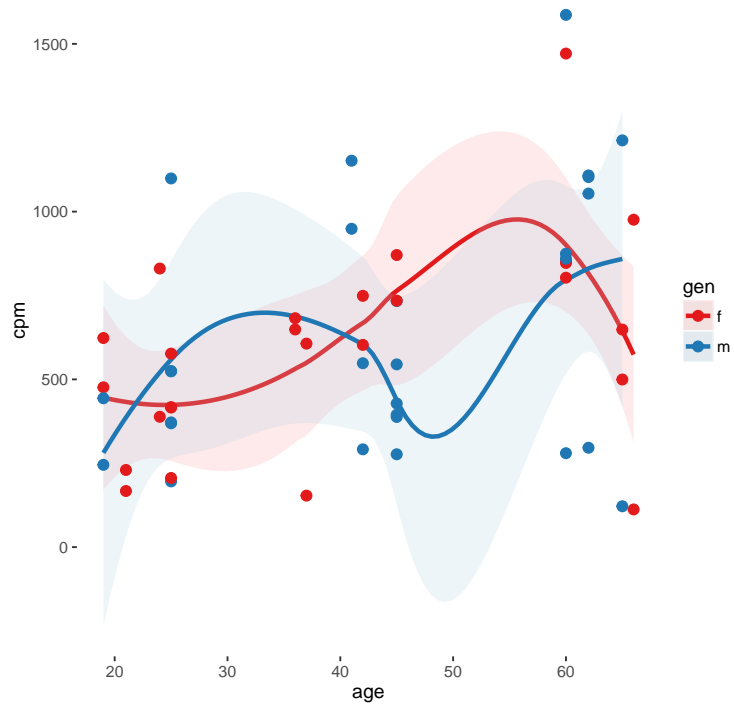



Figure 176: edgeR QLF test based CPM estimates  
Age related expression of GJA1

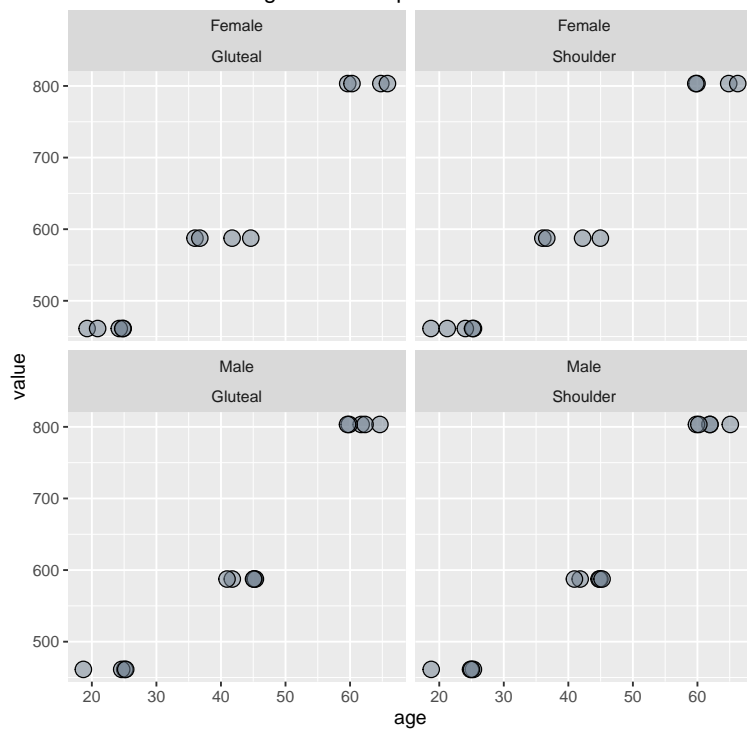

Figure 177: ReadExpSet based genewise CPM estimates  
Age related expression of GJA1

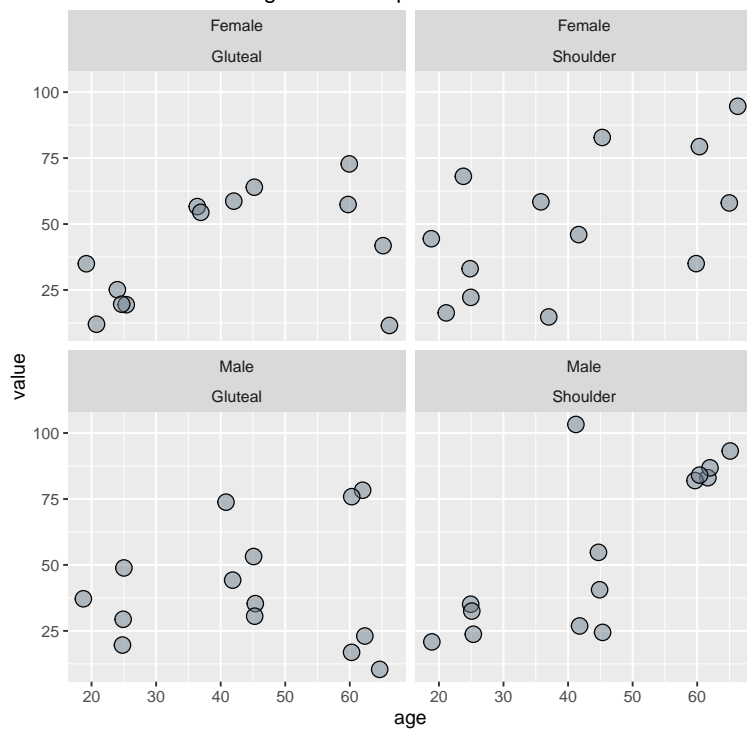

Figure 178: Loess regression for exon align depth

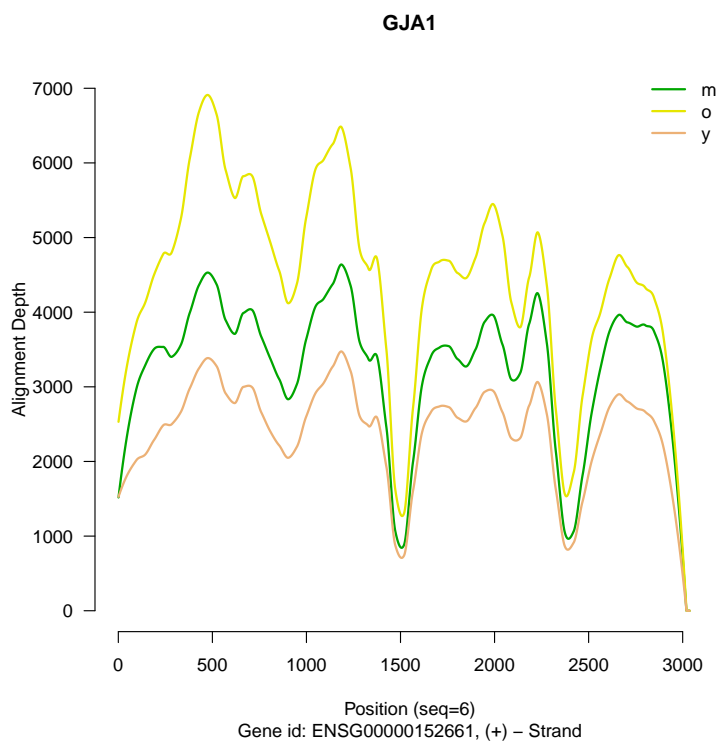

Figure 179: edgeR QLF test based CPM estimates

**Fitted read count values for gene GJA1**

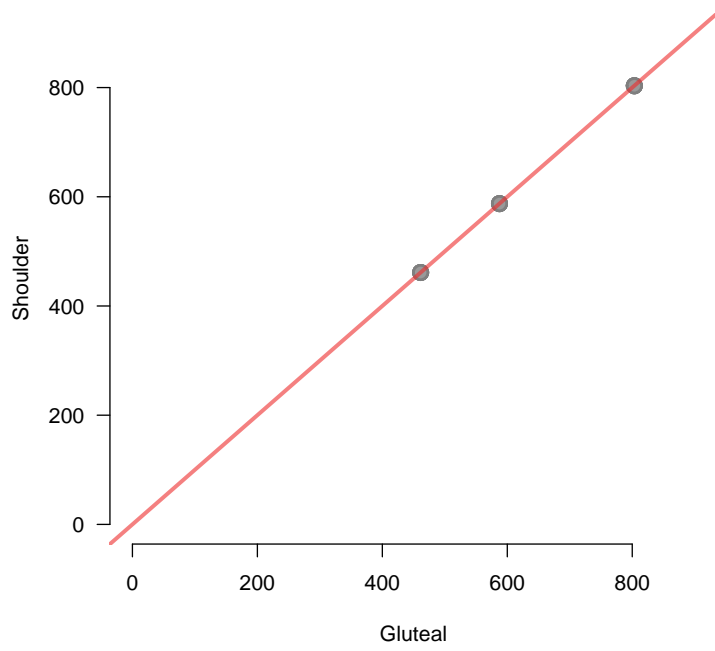

Figure 180: ReadExpSet based genewise CPM estimates

**Maximal gapped alignment depth for gene GJA1**

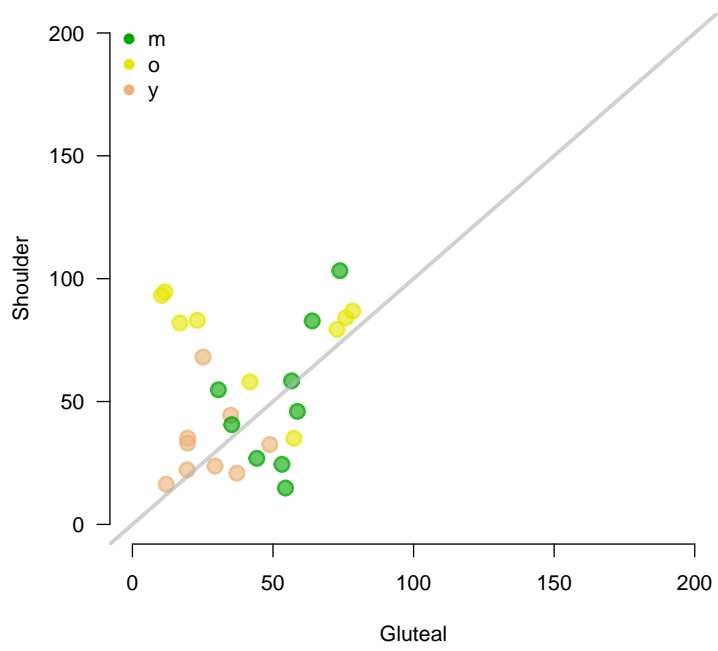

### 3.31 ENC1

| Parameter | Value                                        |
|-----------|----------------------------------------------|
| gene_name | ENC1                                         |
| gene_id   | ENSG00000171617                              |
| maxald    | 1200                                         |
| old       | down                                         |
| seqid     | 5                                            |
| strand    | -                                            |
| start     | 74627406                                     |
| end       | 74641424                                     |
| descr     | ectodermal-neural cortex 1 (with BTB domain) |

Table 32: Gene identification

#### Gene expression estimates for Age

#### Influence of UV exposition on gene expression

Figure 181: Gene expression estimates based on CPM (SummarizeOverlaps)  
Age related expression of ENC1

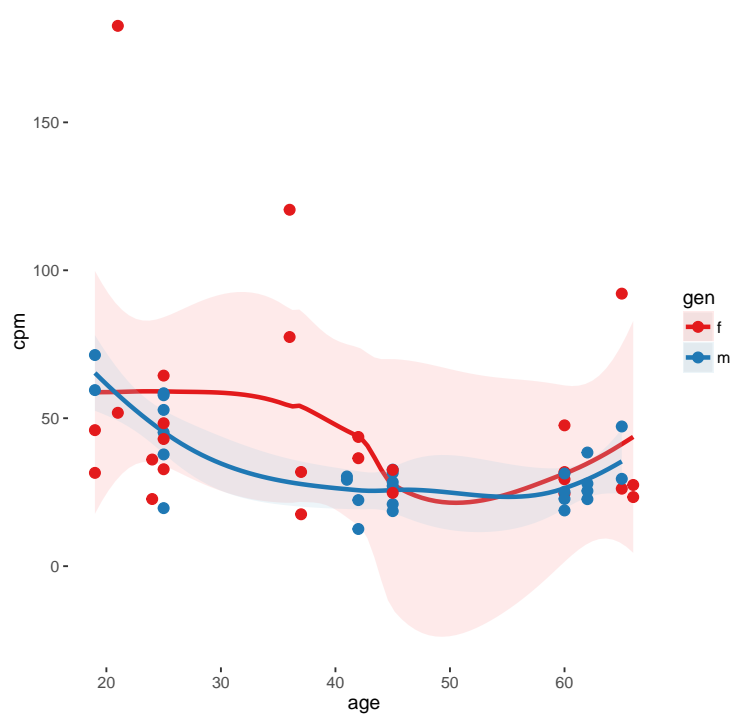

Figure 182: edgeR QLF test based CPM estimates  
Age related expression of ENC1

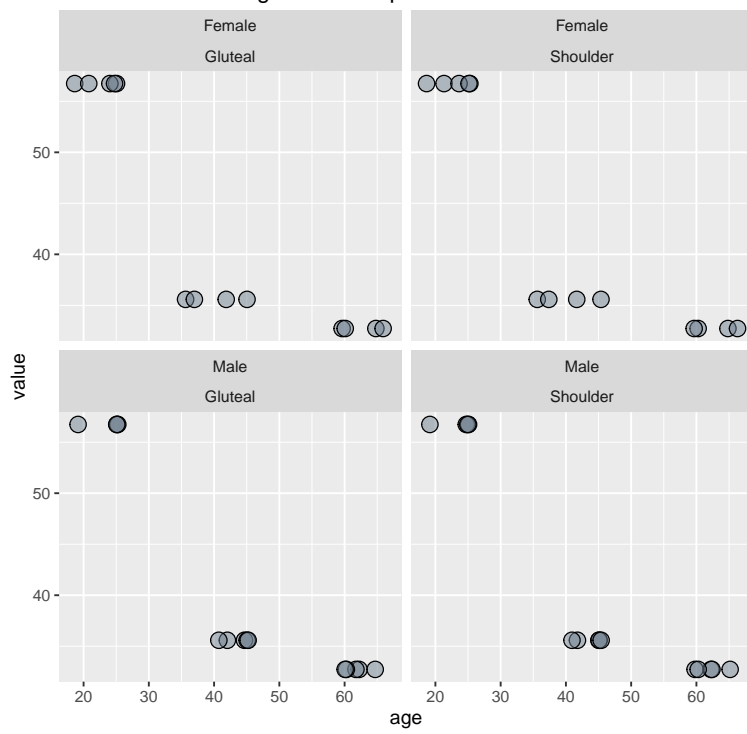



Figure 183: ReadExpSet based genewise CPM estimates  
Age related expression of ENC1

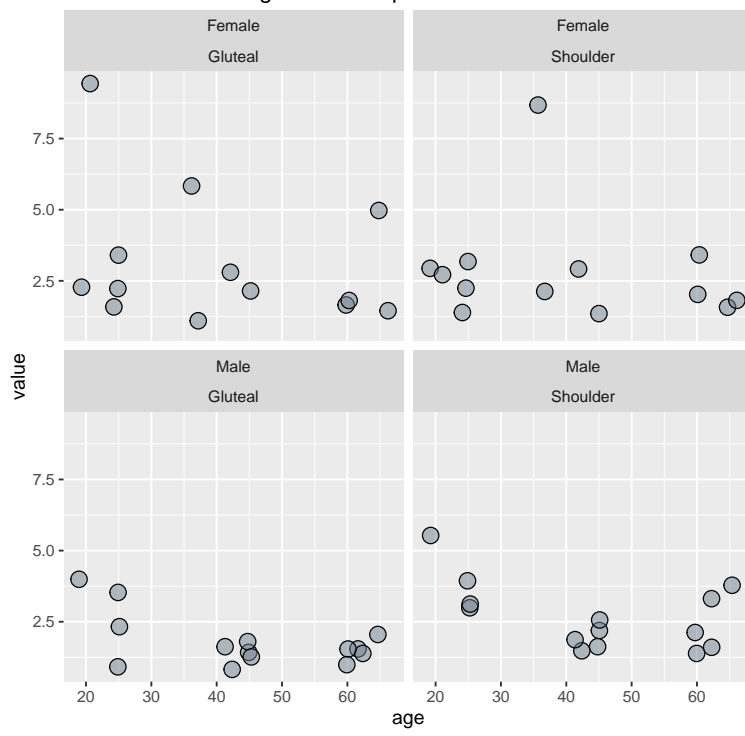

Figure 184: Loess regression for exon align depth

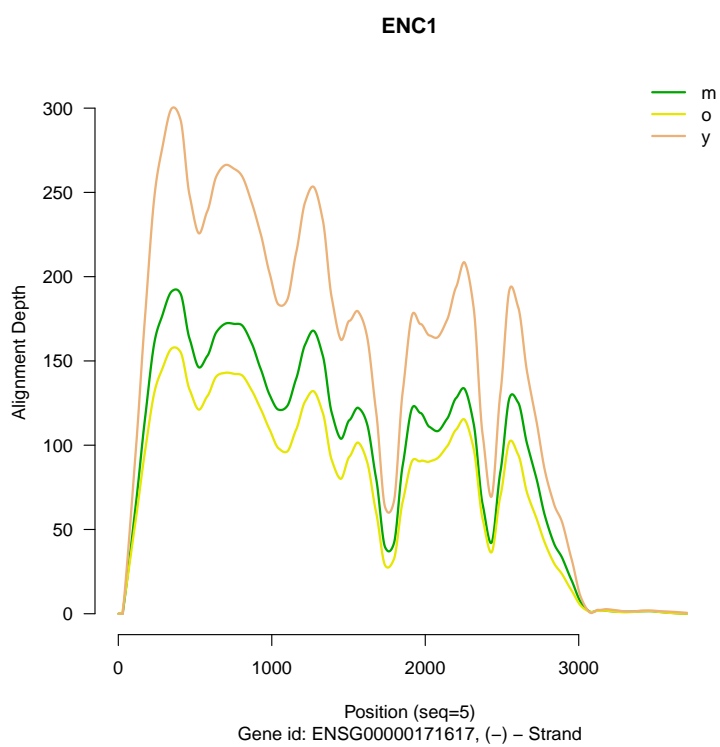

Figure 185: edgeR QLF test based CPM estimates

**Fitted read count values for gene ENC1**

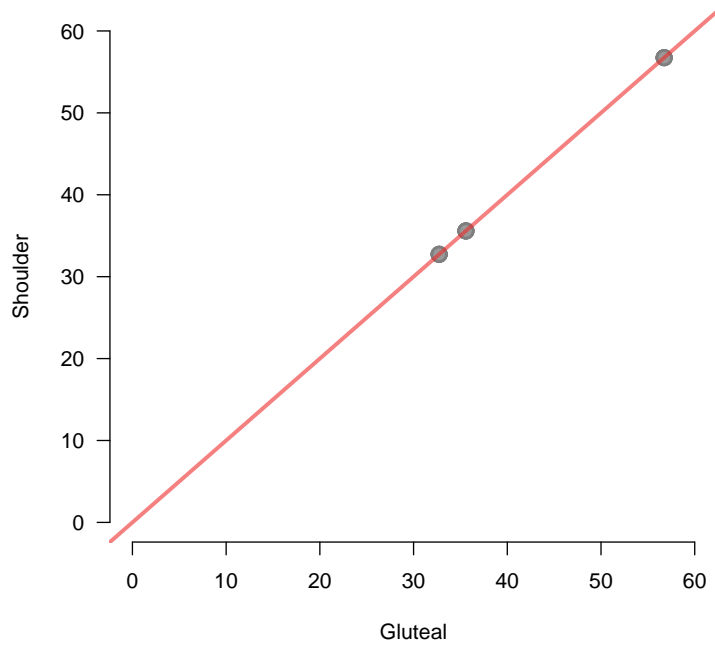

Figure 186: ReadExpSet based genewise CPM estimates

**Maximal gapped alignment depth for gene ENC1**

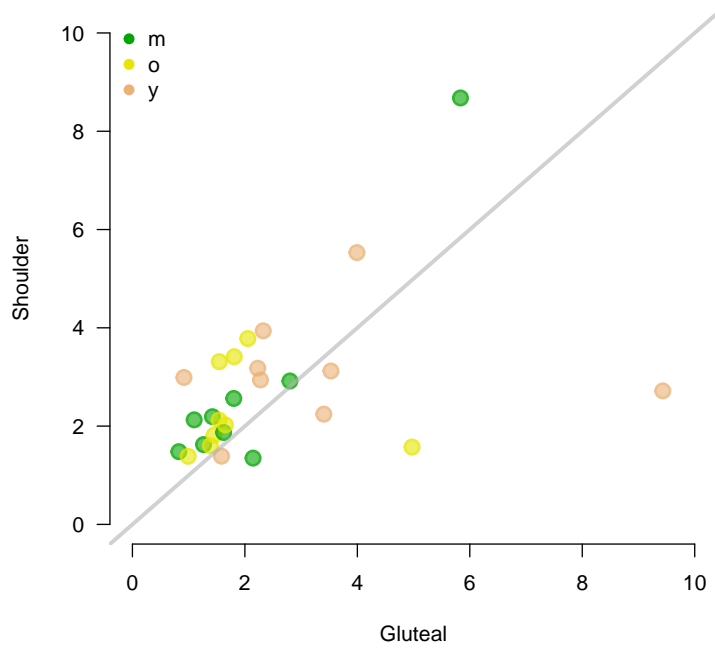

### 3.32 SH2D4A

| Parameter | Value                    |
|-----------|--------------------------|
| gene_name | SH2D4A                   |
| gene_id   | ENSG00000104611          |
| maxald    | 5544                     |
| old       | down                     |
| seqid     | 8                        |
| strand    | +                        |
| start     | 19313617                 |
| end       | 19396218                 |
| descr     | SH2 domain containing 4A |

Table 33: Gene identification

#### Gene expression estimates for Age

#### Influence of UV exposition on gene expression

Figure 187: Gene expression estimates based on CPM (SummarizeOverlaps)  
Age related expression of SH2D4A

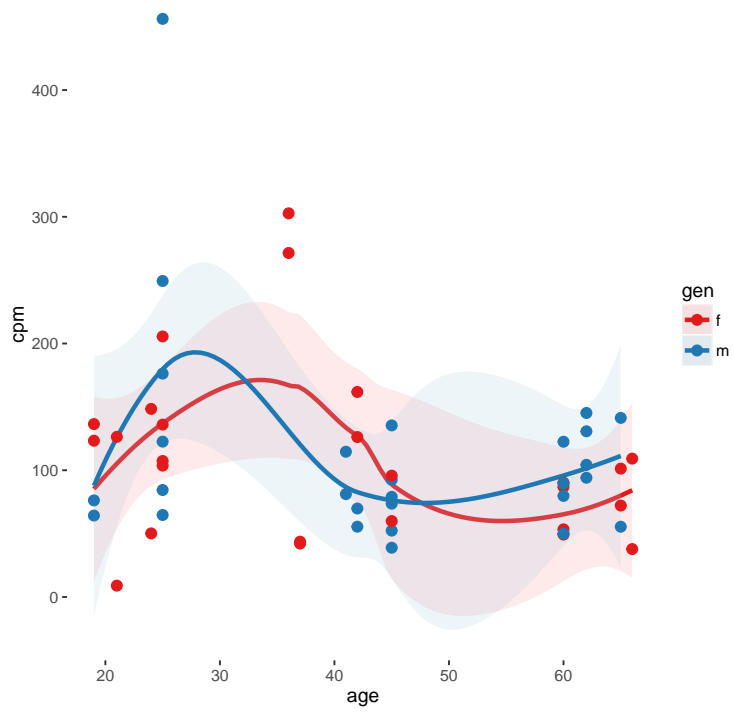

Figure 188: edgeR QLF test based CPM estimates  
Age related expression of SH2D4A

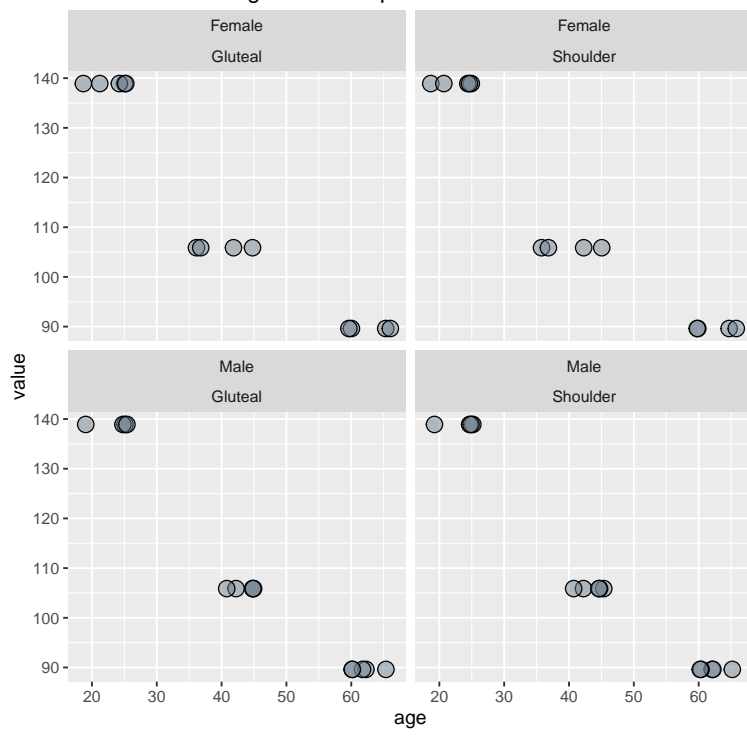

Figure 189: ReadExpSet based genewise CPM estimates  
Age related expression of SH2D4A

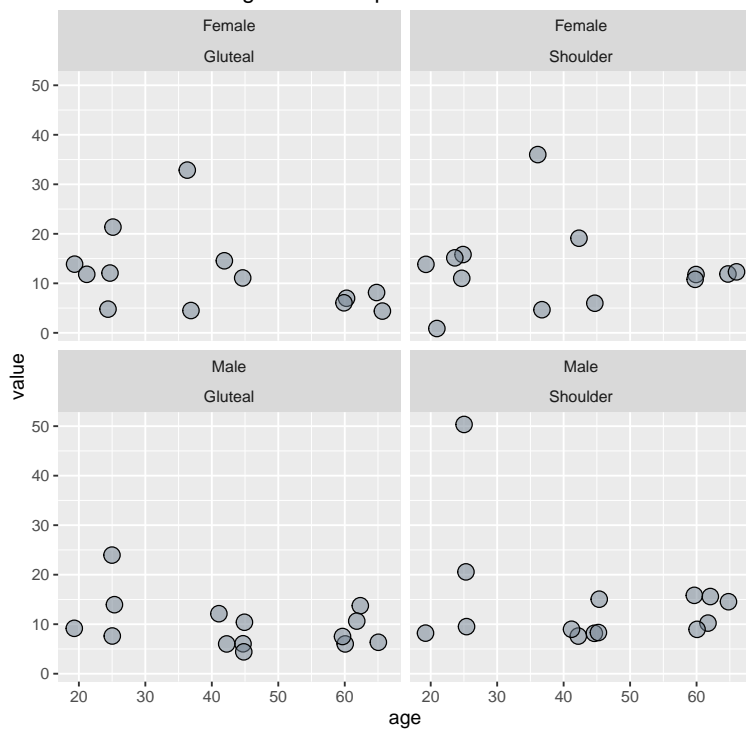



Figure 190: Loess regression for exon align depth

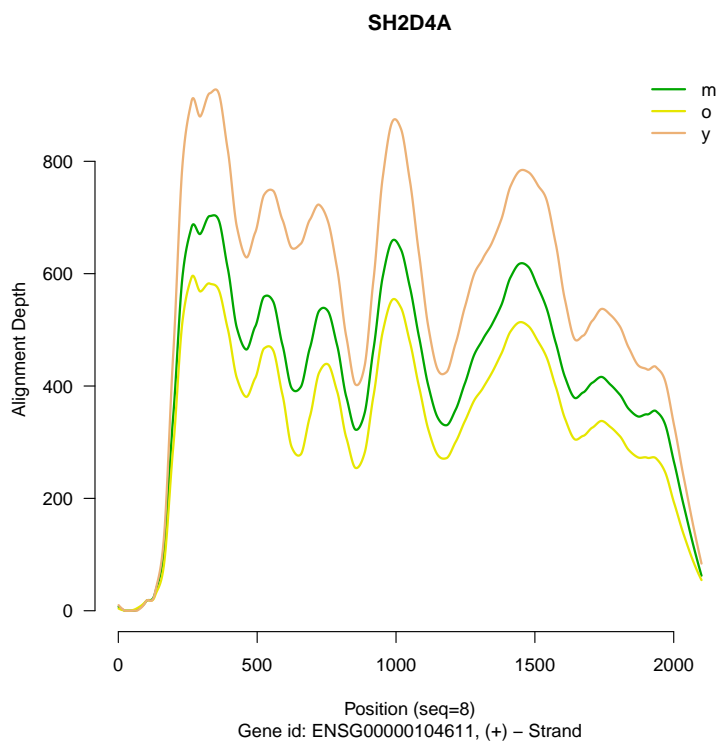

Figure 191: edgeR QLF test based CPM estimates

**Fitted read count values for gene SH2D4A**

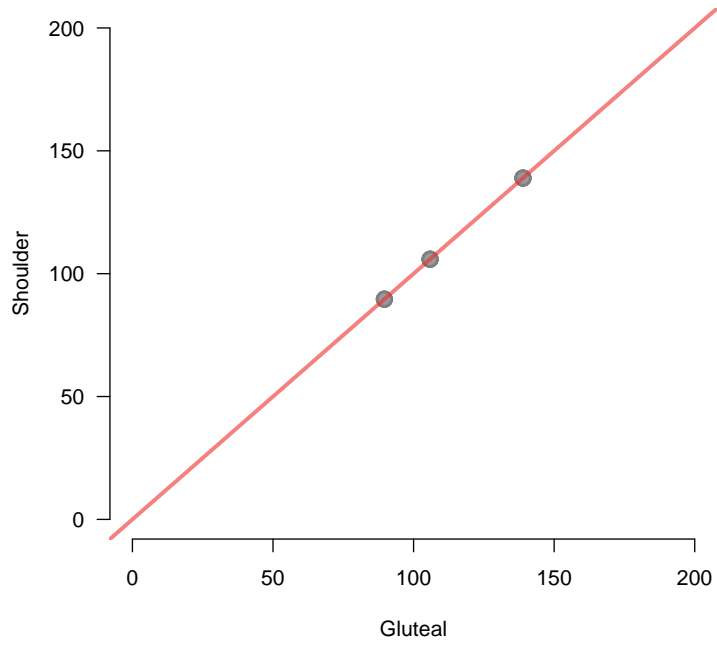

Figure 192: ReadExpSet based genewise CPM estimates

**Maximal gapped alignment depth for gene SH2D4A**

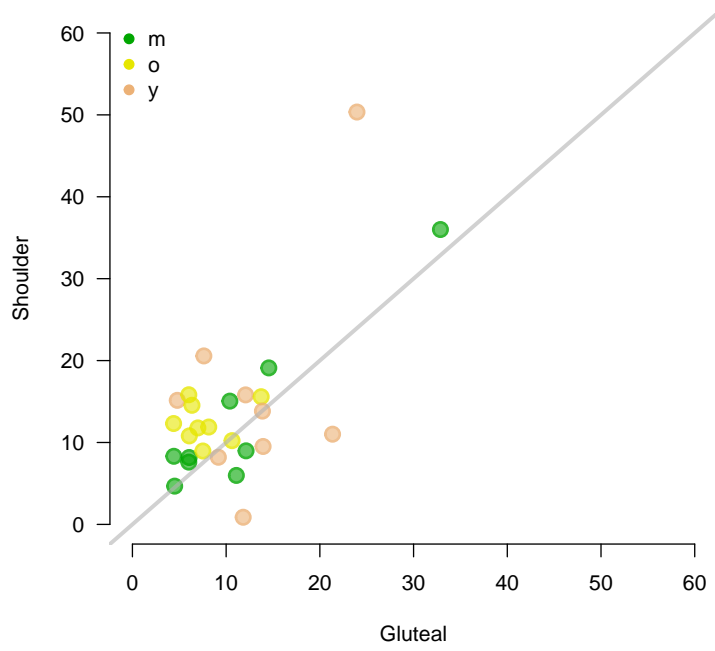

### 3.33 ARHGAP23P1

| Parameter | Value                                         |
|-----------|-----------------------------------------------|
| gene_name | ARHGAP23P1                                    |
| gene_id   | ENSG00000260781                               |
| maxald    | 763                                           |
| old       | down                                          |
| seqid     | 16                                            |
| strand    | -                                             |
| start     | 33907419                                      |
| end       | 33937167                                      |
| descr     | Rho GTPase activating protein 23 pseudogene 1 |

Table 34: Gene identification

#### Gene expression estimates for Age

#### Influence of UV exposition on gene expression

Figure 193: Gene expression estimates based on CPM (SummarizeOverlaps)  
Age related expression of ARHGAP23P1

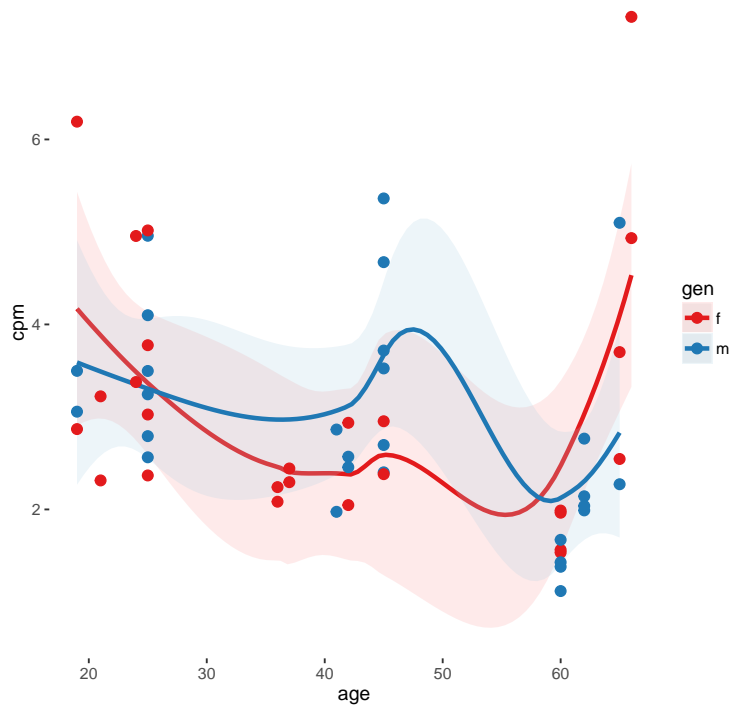

Figure 194: edgeR QLF test based CPM estimates  
Age related expression of ARHGAP23P1

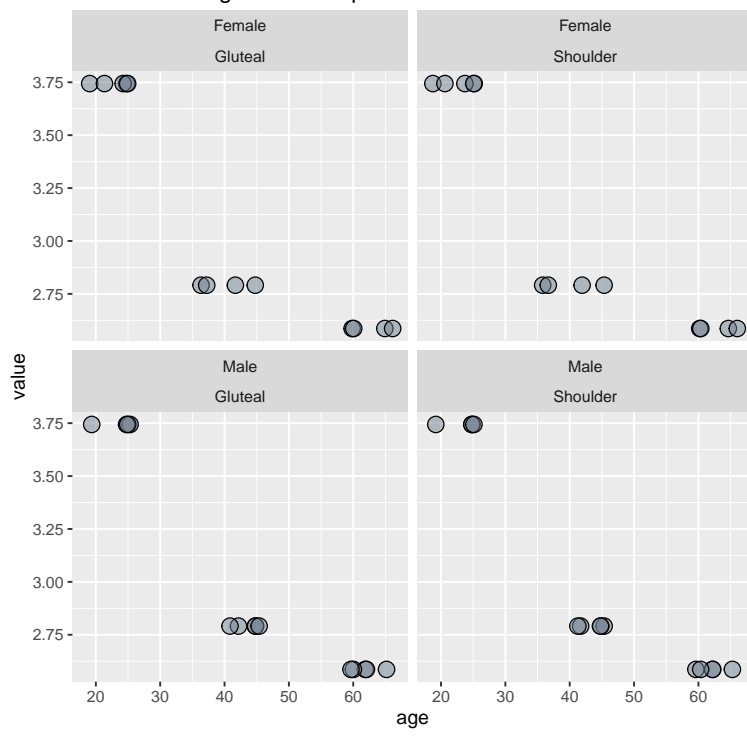

Figure 195: ReadExpSet based genewise CPM estimates  
Age related expression of ARHGAP23P1

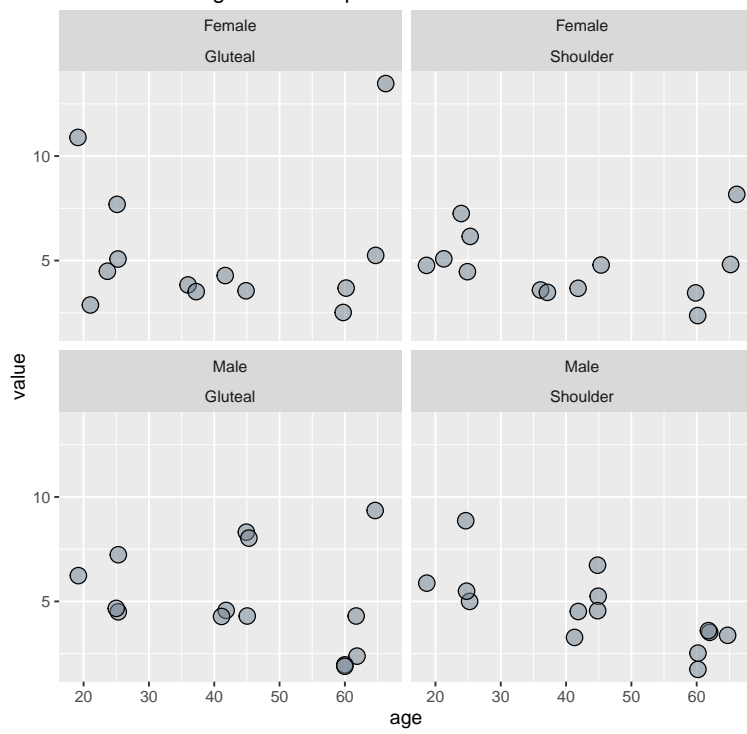

Figure 196: Loess regression for exon align depth

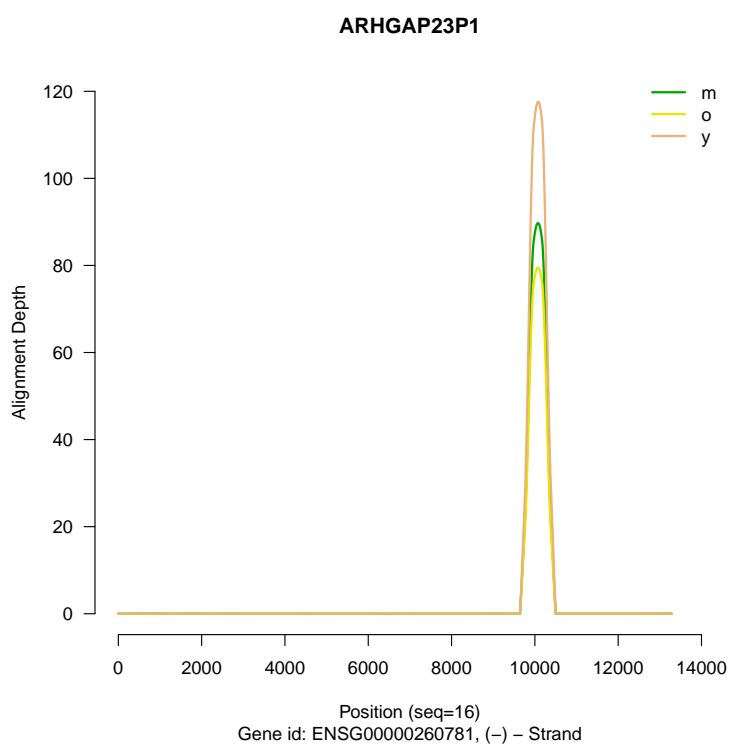



Figure 197: edgeR QLF test based CPM estimates

**Fitted read count values for gene ARHGAP23P1**

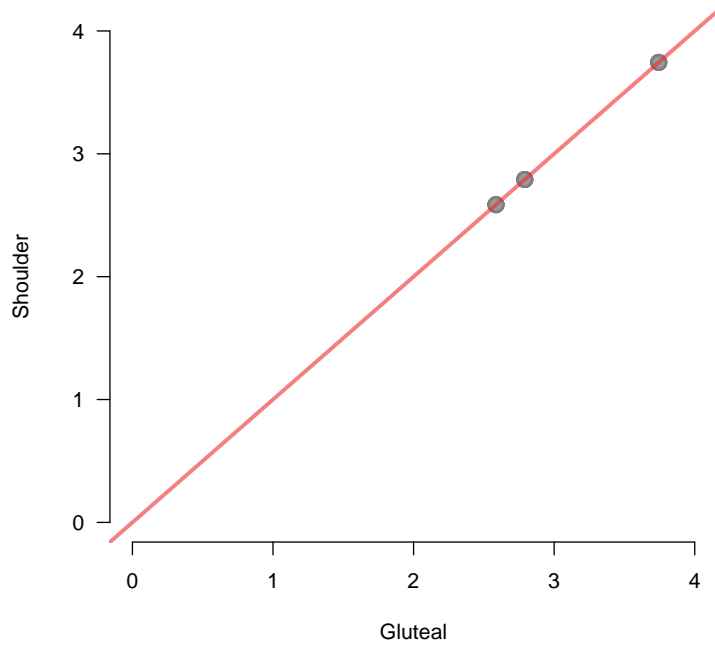

Figure 198: ReadExpSet based genewise CPM estimates

**Maximal gapped alignment depth for gene ARHGAP23P1**

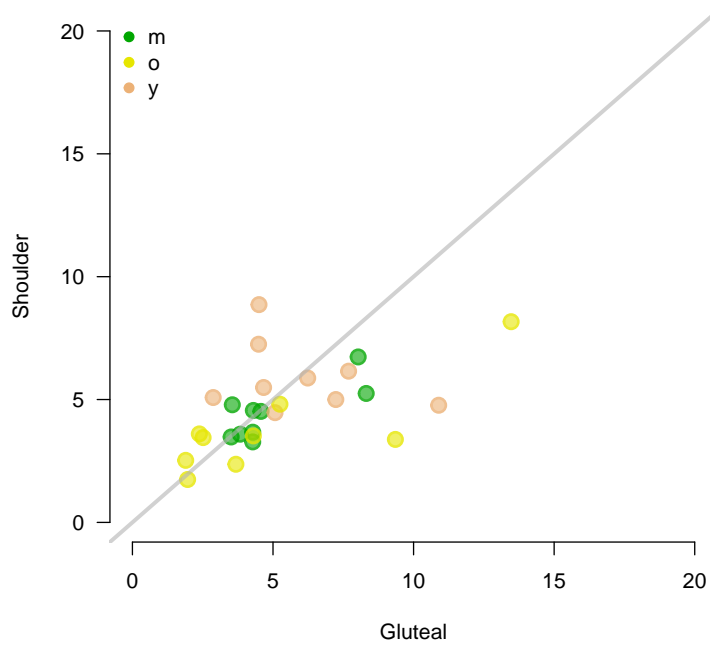

### 3.34 SERTAD1

| Parameter | Value                     |
|-----------|---------------------------|
| gene_name | SERTAD1                   |
| gene_id   | ENSG00000197019           |
| maxald    | 2018                      |
| old       | down                      |
| seqid     | 19                        |
| strand    | -                         |
| start     | 40421592                  |
| end       | 40426025                  |
| descr     | SERTA domain containing 1 |

Table 35: Gene identification

#### Gene expression estimates for Age

#### Influence of UV exposition on gene expression

Figure 199: Gene expression estimates based on CPM (SummarizeOveraps)  
Age related expression of SERTAD1

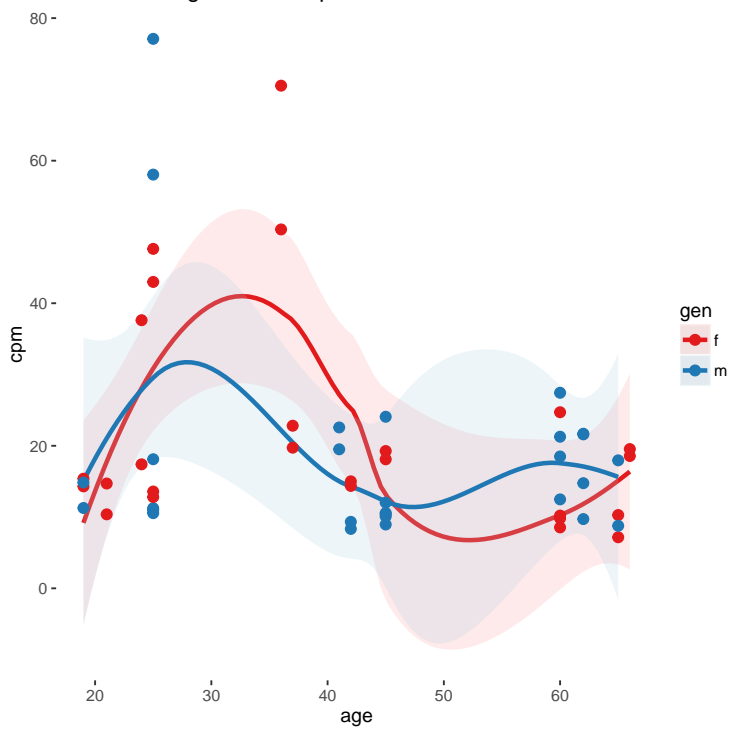

Figure 200: edgeR QLF test based CPM estimates  
Age related expression of SERTAD1

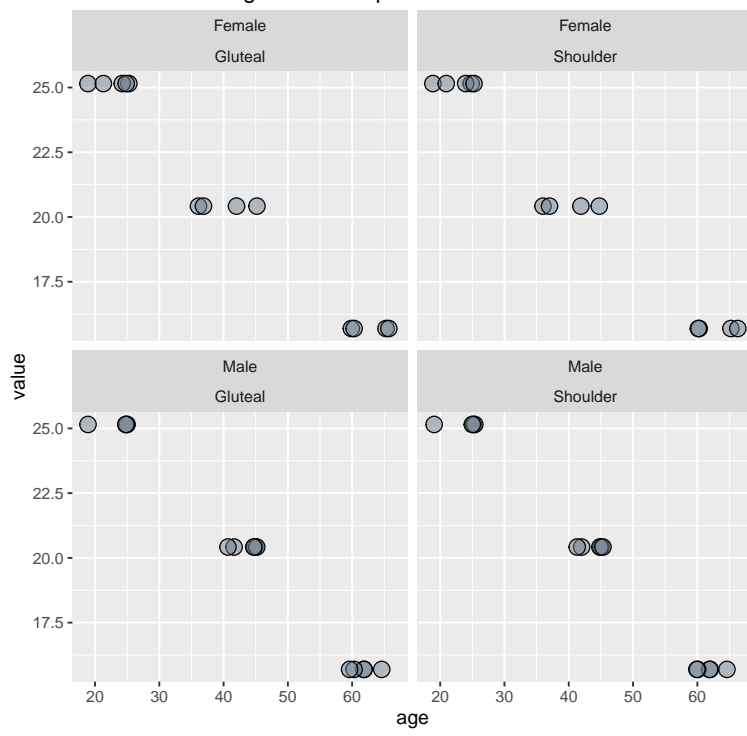

Figure 201: ReadExpSet based genewise CPM estimates  
Age related expression of SERTAD1

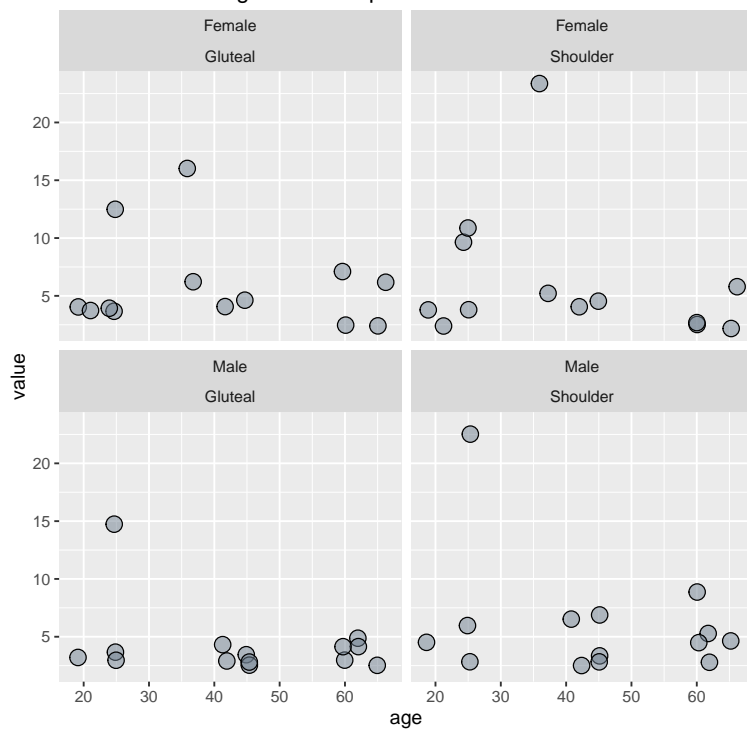

Figure 202: Loess regression for exon align depth

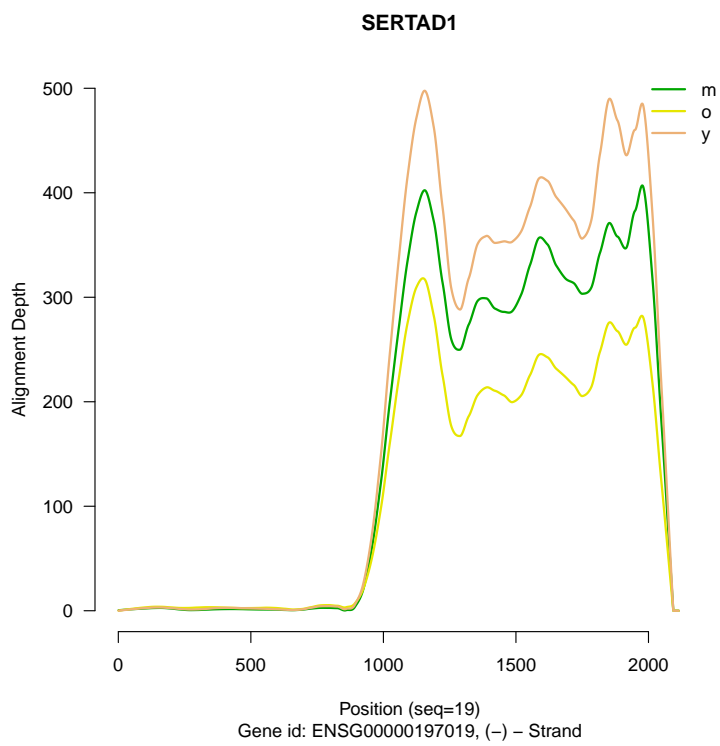

Figure 203: edgeR QLF test based CPM estimates

**Fitted read count values for gene SERTAD1**

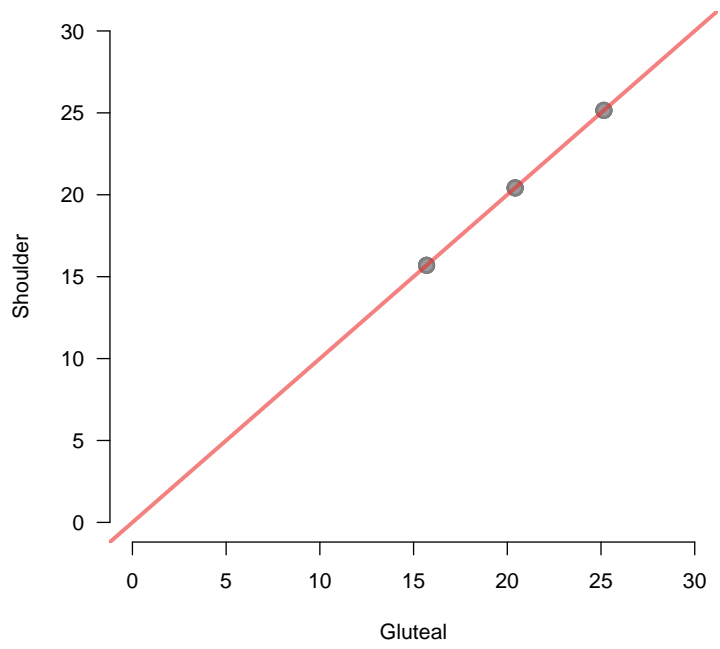



Figure 204: ReadExpSet based genewise CPM estimates

**Maximal gapped alignment depth for gene SERTAD1**

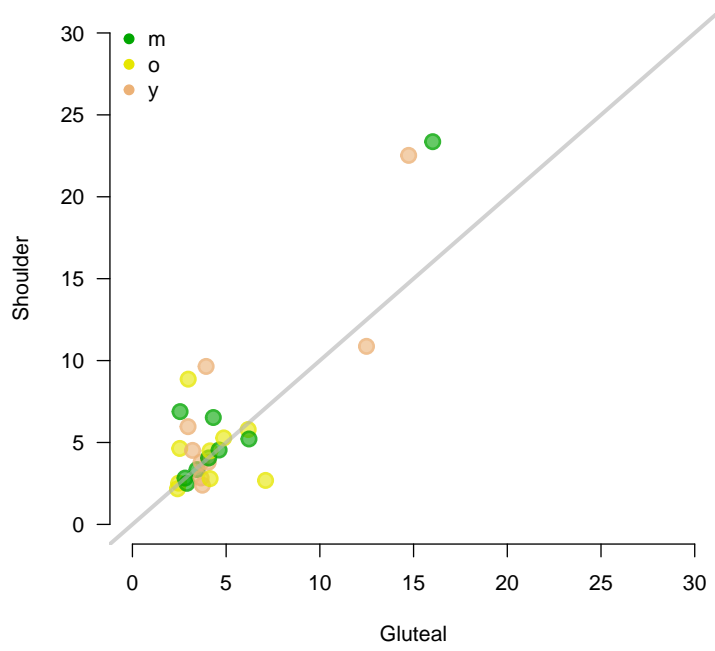

### 3.35 FGF13

| Parameter | Value                       |
|-----------|-----------------------------|
| gene_name | FGF13                       |
| gene_id   | ENSG00000129682             |
| maxald    | 345                         |
| old       | up                          |
| seqid     | X                           |
| strand    | -                           |
| start     | 138614731                   |
| end       | 139222777                   |
| descr     | fibroblast growth factor 13 |

Table 36: Gene identification

#### Gene expression estimates for Age

#### Influence of UV exposition on gene expression

Figure 205: Gene expression estimates based on CPM (SummarizeOverlaps)  
Age related expression of FGF13

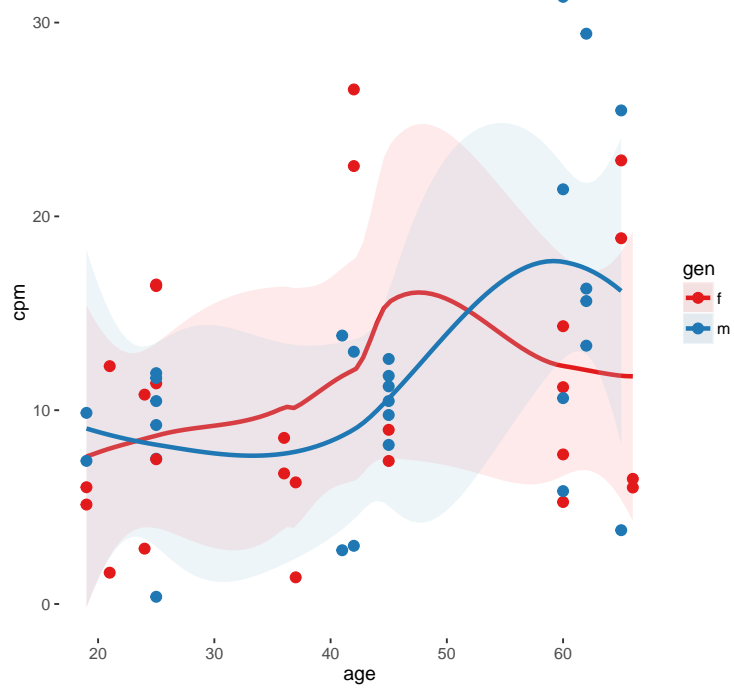

Figure 206: edgeR QLF test based CPM estimates  
Age related expression of FGF13

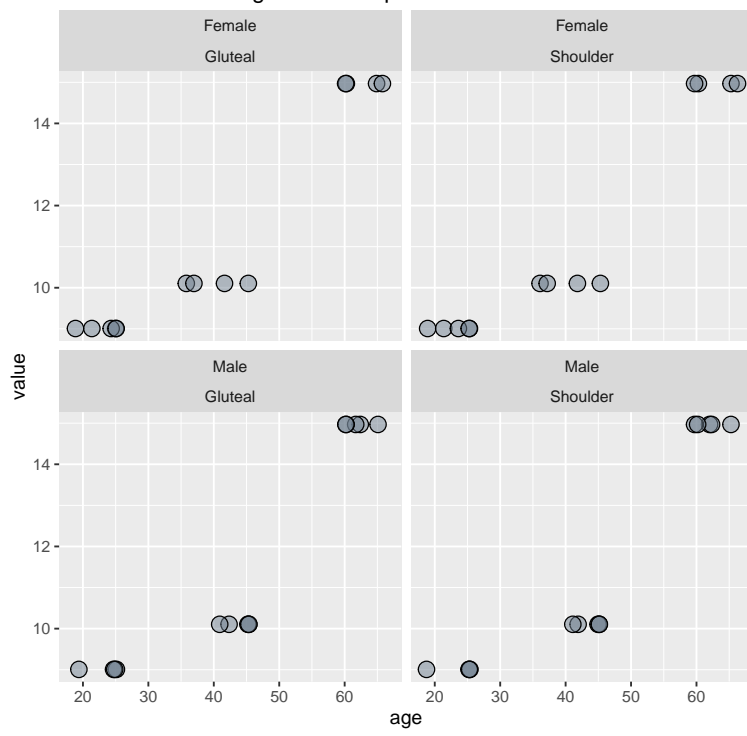

Figure 207: ReadExpSet based genewise CPM estimates  
Age related expression of FGF13

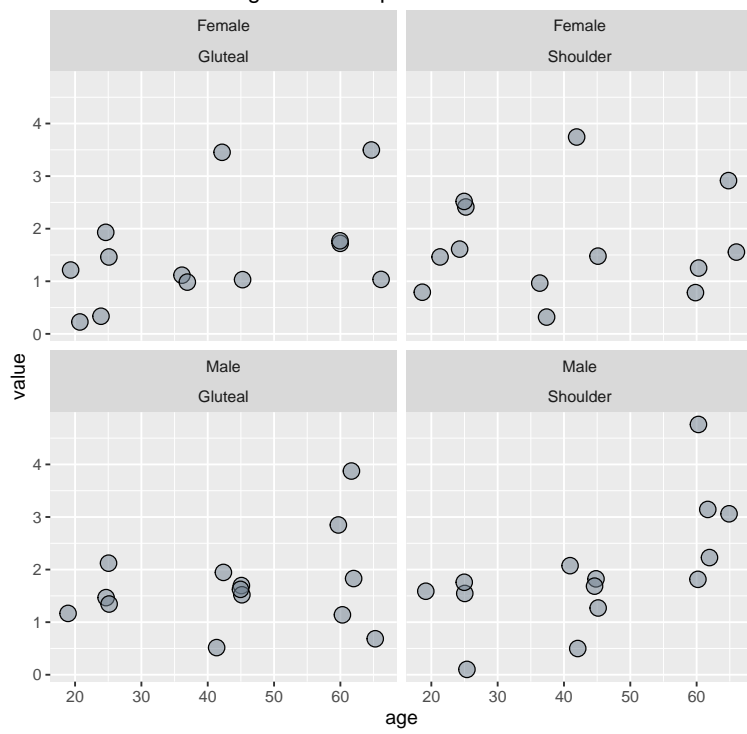

Figure 208: Loess regression for exon align depth

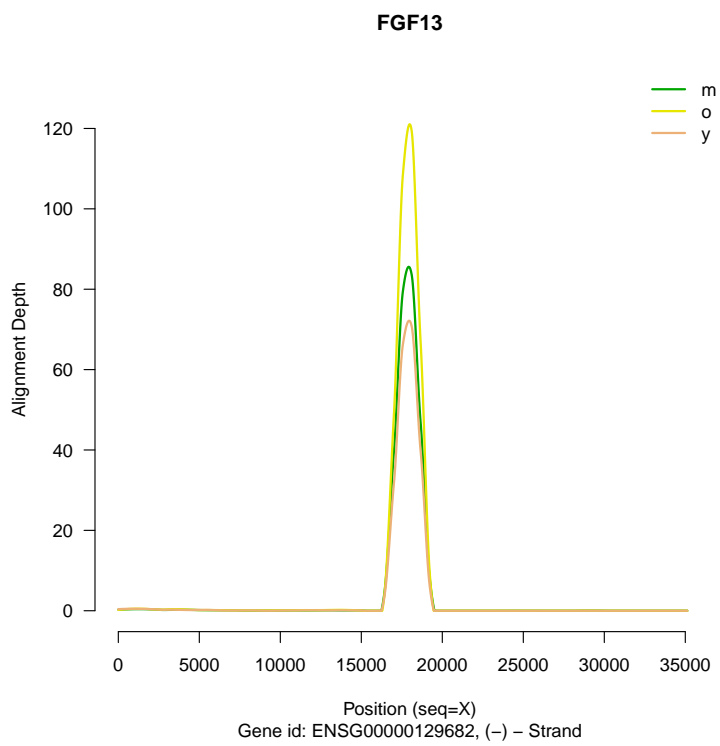

Figure 209: edgeR QLF test based CPM estimates

**Fitted read count values for gene FGF13**

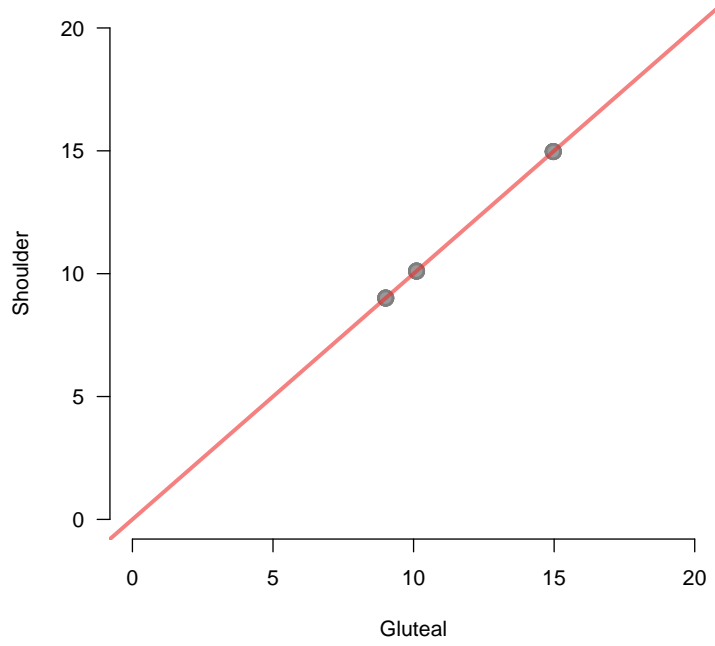

Figure 210: ReadExpSet based genewise CPM estimates

**Maximal gapped alignment depth for gene FGF13**

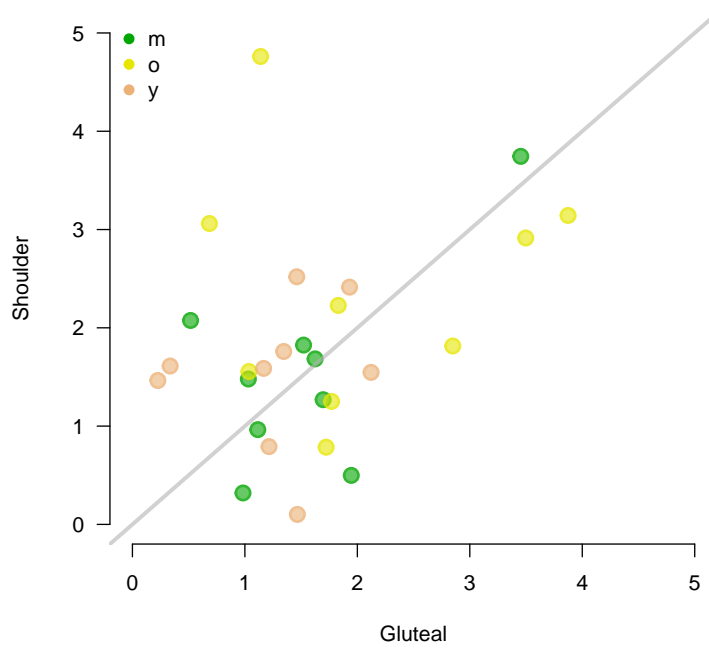



### 3.36 EHD1

| Parameter | Value                  |
|-----------|------------------------|
| gene_name | EHD1                   |
| gene_id   | ENSG00000110047        |
| maxald    | 2871                   |
| old       | down                   |
| seqid     | 11                     |
| strand    | -                      |
| start     | 64851642               |
| end       | 64888296               |
| descr     | EH-domain containing 1 |

Table 37: Gene identification

#### Gene expression estimates for Age

#### Influence of UV exposition on gene expression

Figure 211: Gene expression estimates based on CPM (SummarizeOveraps)  
Age related expression of EHD1

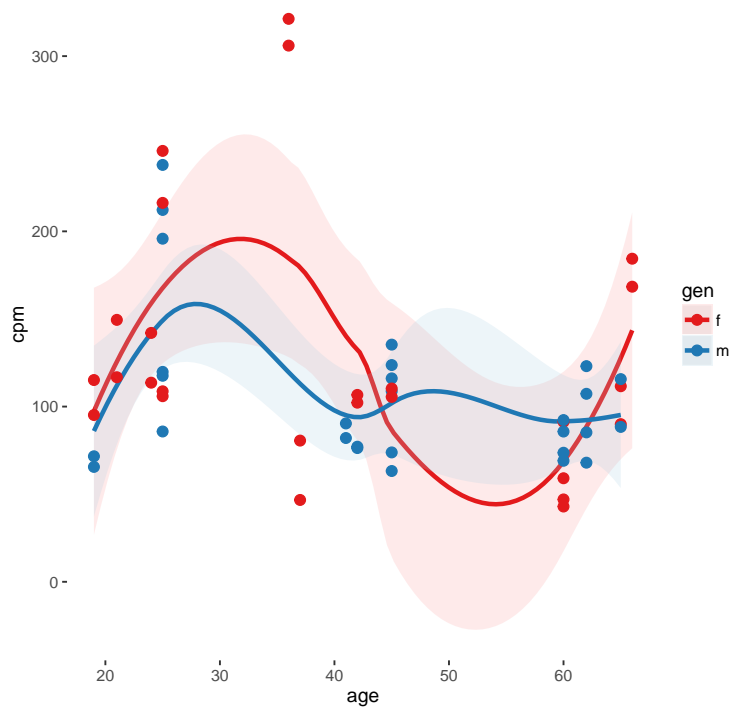

Figure 212: edgeR QLF test based CPM estimates  
Age related expression of EHD1

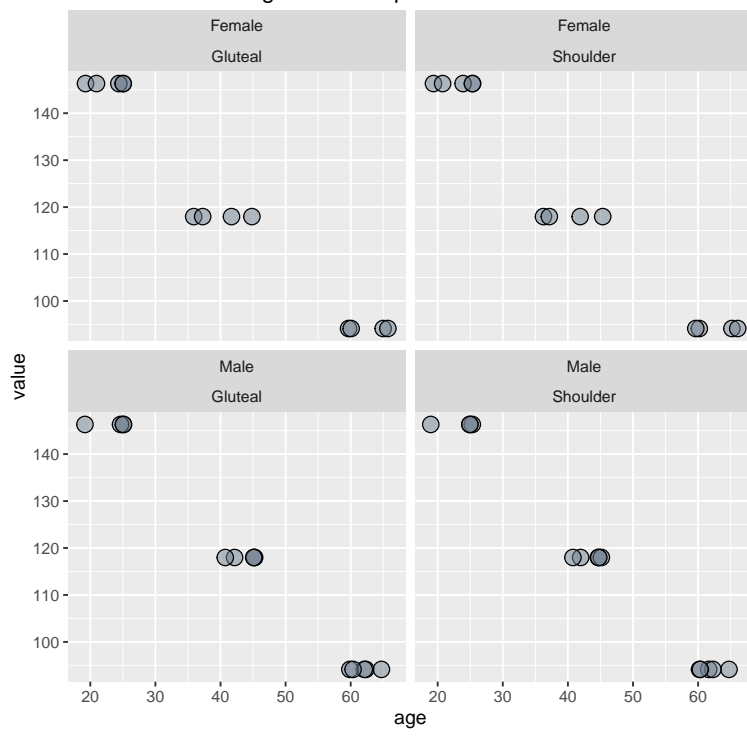

Figure 213: ReadExpSet based genewise CPM estimates  
Age related expression of EHD1

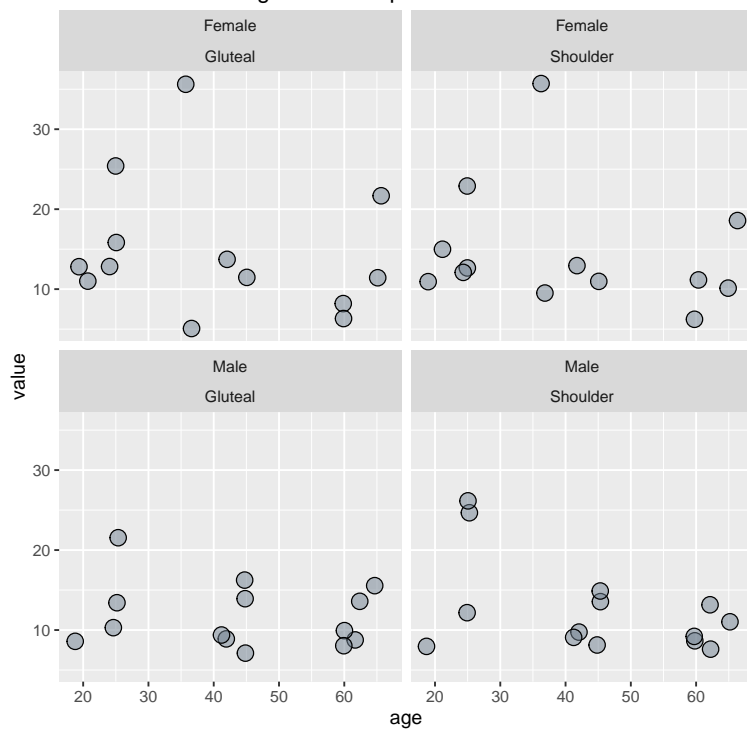

Figure 214: Loess regression for exon align depth

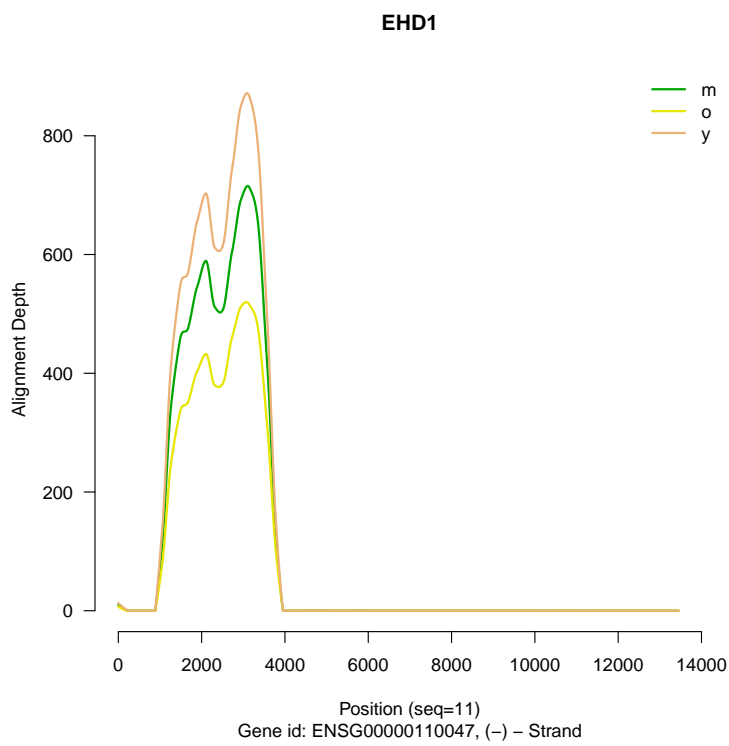

Figure 215: edgeR QLF test based CPM estimates

**Fitted read count values for gene EHD1**

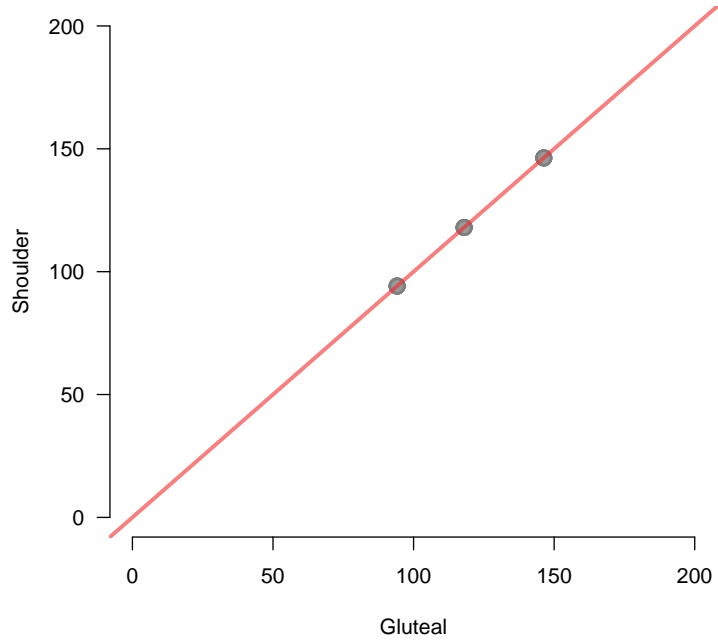

Figure 216: ReadExpSet based genewise CPM estimates

**Maximal gapped alignment depth for gene EHD1**

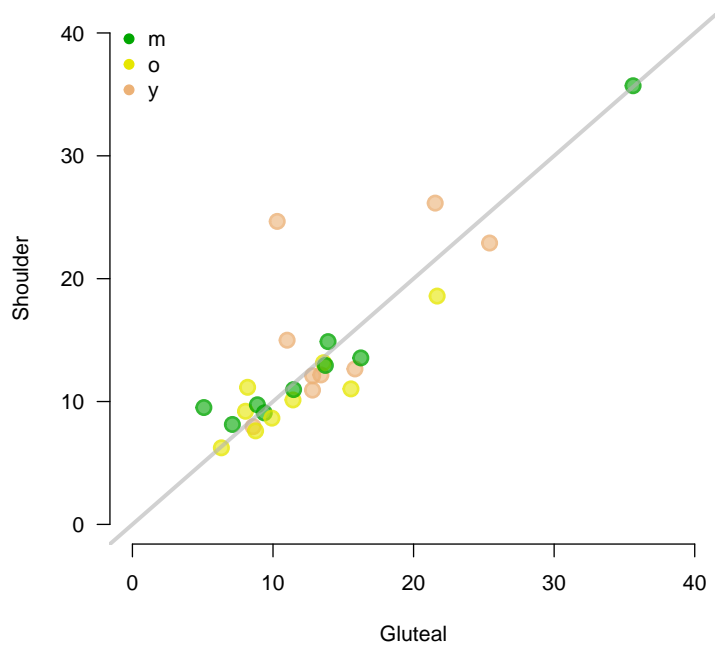

### 3.37 USP41

| Parameter | Value                           |
|-----------|---------------------------------|
| gene_name | USP41                           |
| gene_id   | ENSG00000161133                 |
| maxald    | 155                             |
| old       | up                              |
| seqid     | 22                              |
| strand    | -                               |
| start     | 20350578                        |
| end       | 20390758                        |
| descr     | ubiquitin specific peptidase 41 |

Table 38: Gene identification

#### Gene expression estimates for Age

#### Influence of UV exposition on gene expression



Figure 217: Gene expression estimates based on CPM (SummarizeOverlaps)  
Age related expression of USP41

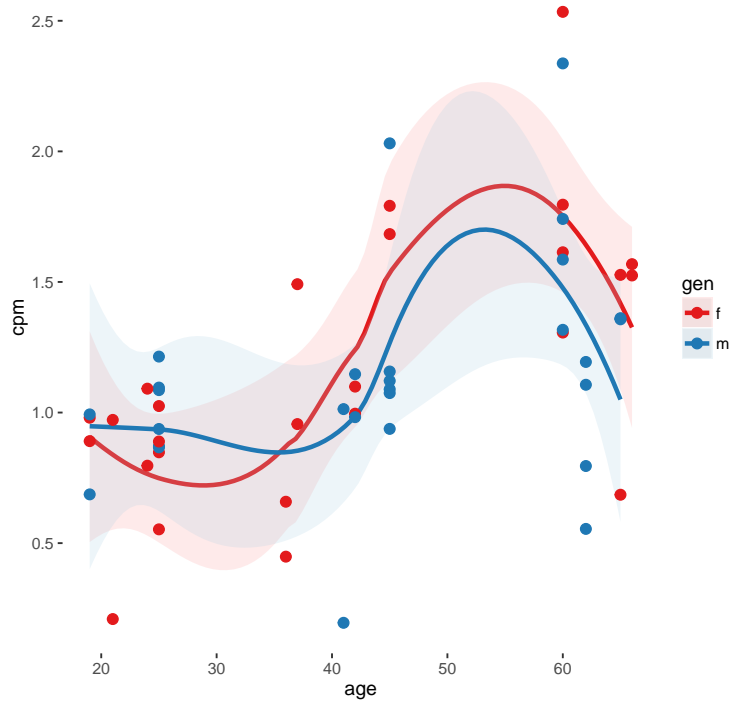

Figure 218: edgeR QLF test based CPM estimates  
Age related expression of USP41

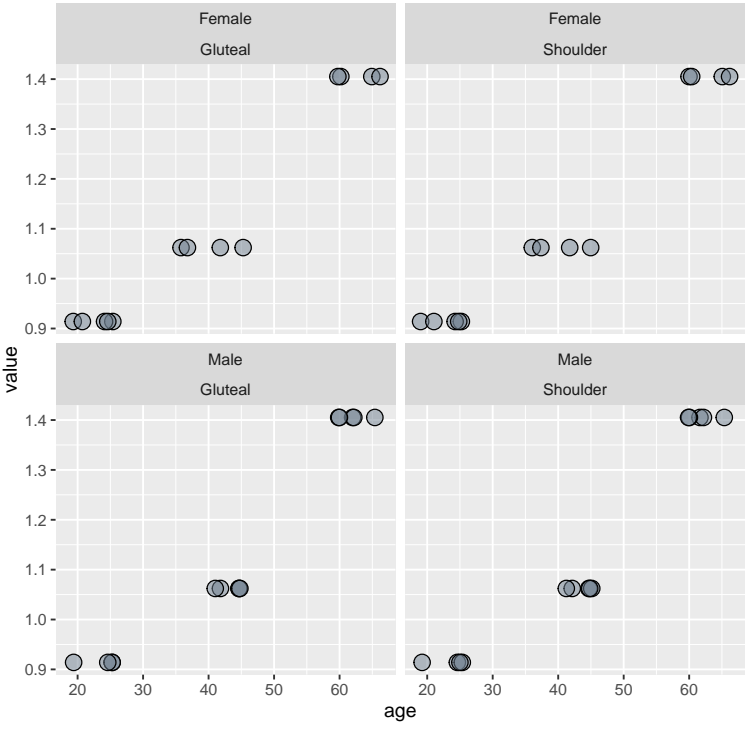

Figure 219: ReadExpSet based genewise CPM estimates  
Age related expression of USP41

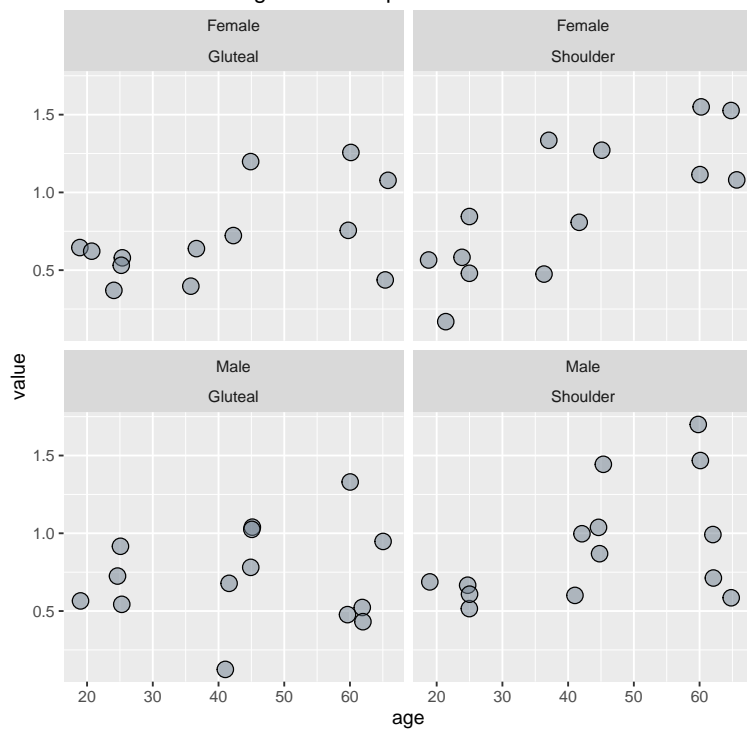

Figure 220: Loess regression for exon align depth

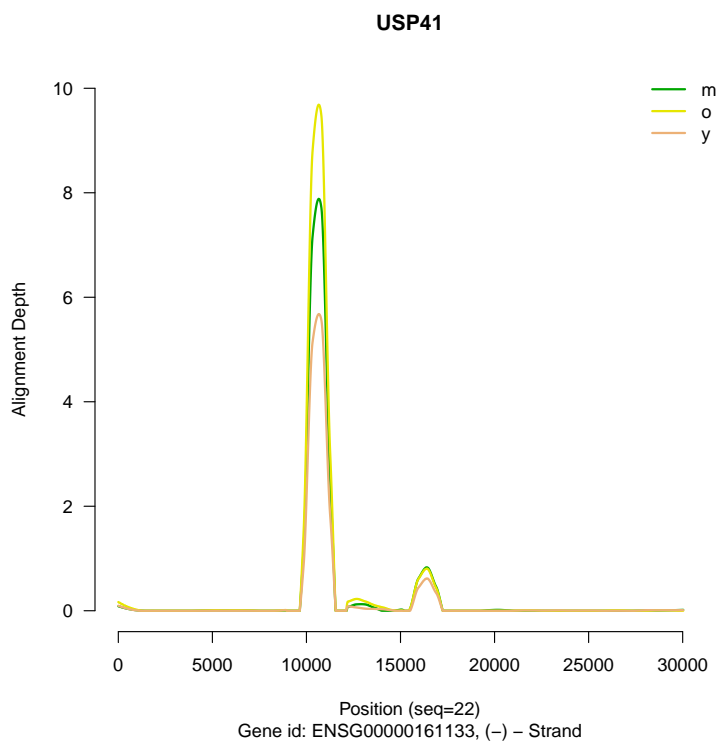

Figure 221: edgeR QLF test based CPM estimates

**Fitted read count values for gene USP41**

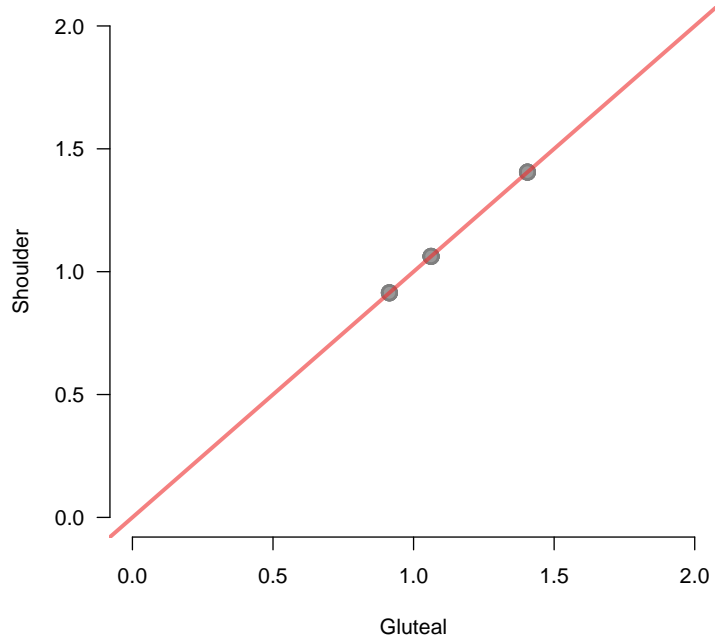

Figure 222: ReadExpSet based genewise CPM estimates

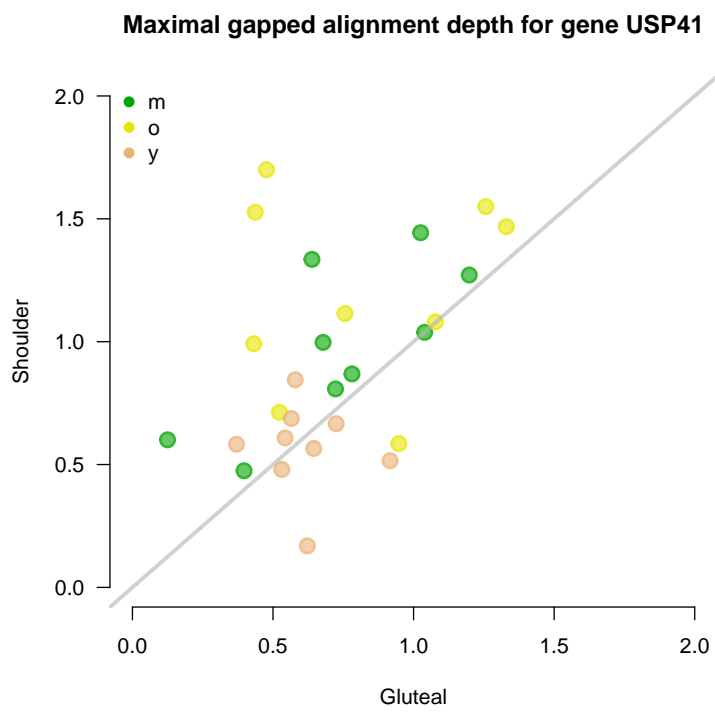

### 3.38 ACSS3

| Parameter | Value                                           |
|-----------|-------------------------------------------------|
| gene_name | ACSS3                                           |
| gene_id   | ENSG00000111058                                 |
| maxald    | 201                                             |
| old       | down                                            |
| seqid     | 12                                              |
| strand    | +                                               |
| start     | 80936414                                        |
| end       | 81261205                                        |
| descr     | acyl-CoA synthetase short-chain family member 3 |

Table 39: Gene identification

#### Gene expression estimates for Age

#### Influence of UV exposition on gene expression

Figure 223: Gene expression estimates based on CPM (SummarizeOverlaps)  
Age related expression of ACSS3

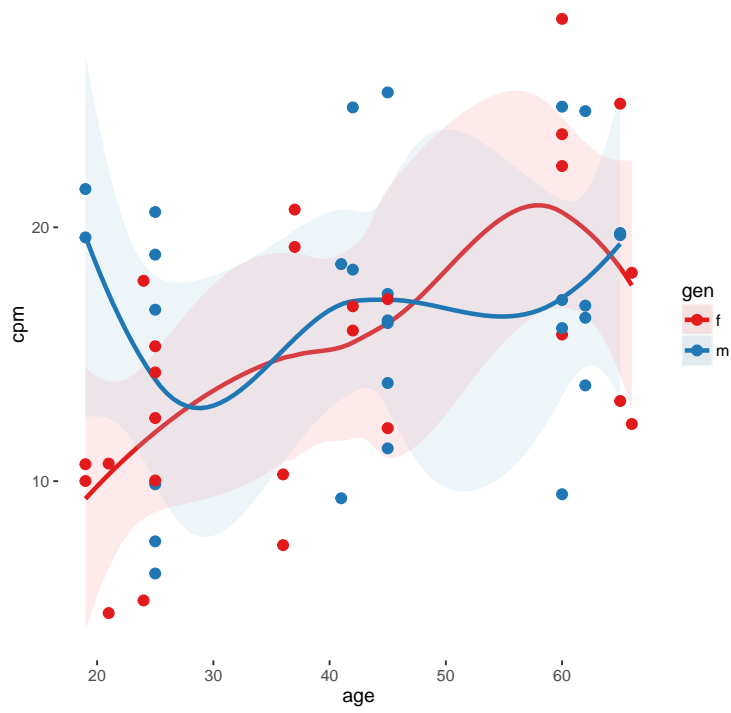



Figure 224: edgeR QLF test based CPM estimates  
Age related expression of ACSS3

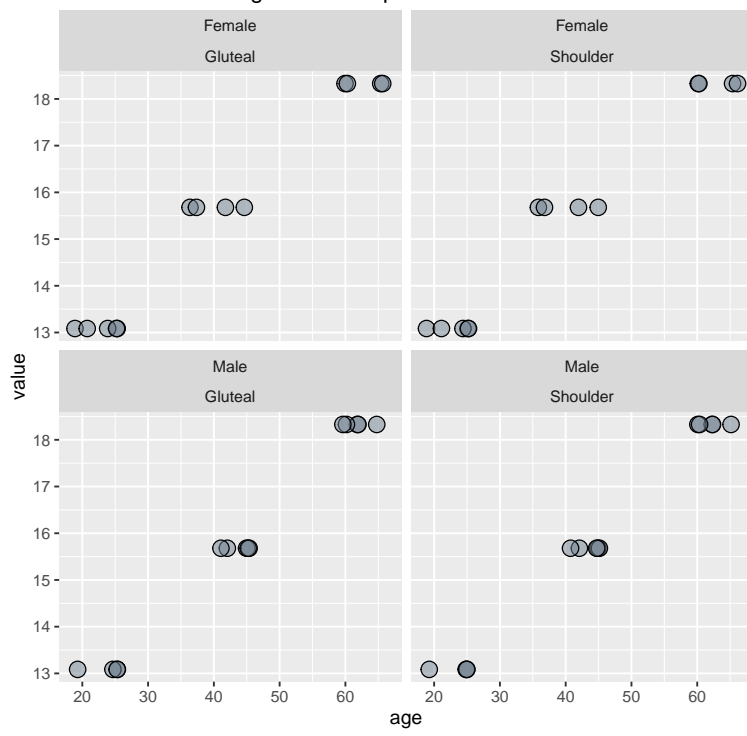

Figure 225: ReadExpSet based genewise CPM estimates  
Age related expression of ACSS3

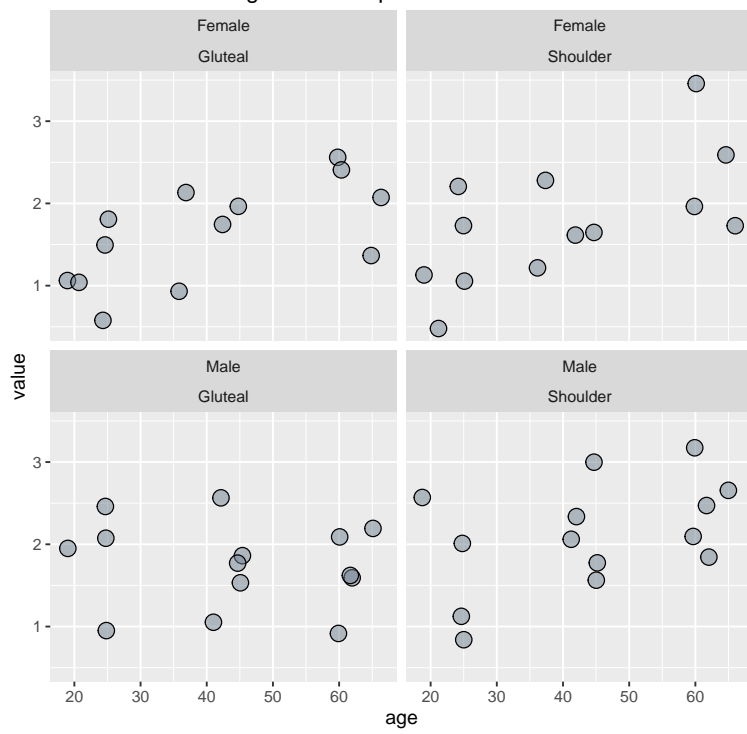

Figure 226: Loess regression for exon align depth

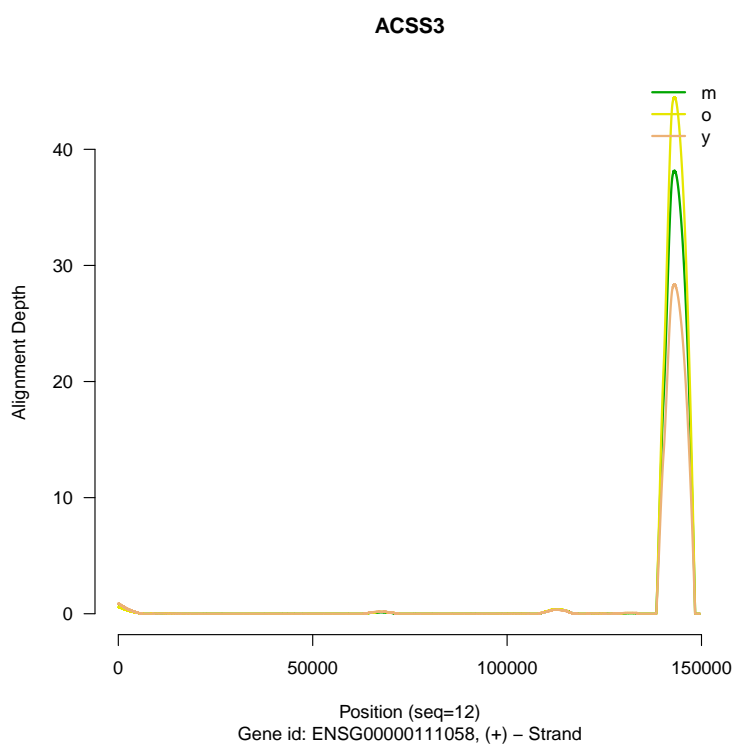

Figure 227: edgeR QLF test based CPM estimates

**Fitted read count values for gene ACSS3**

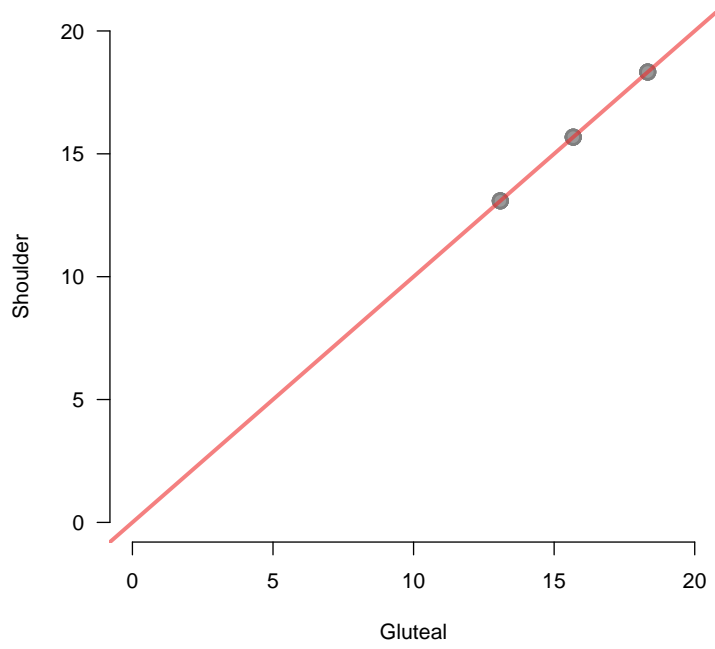

Figure 228: ReadExpSet based genewise CPM estimates

**Maximal gapped alignment depth for gene ACSS3**

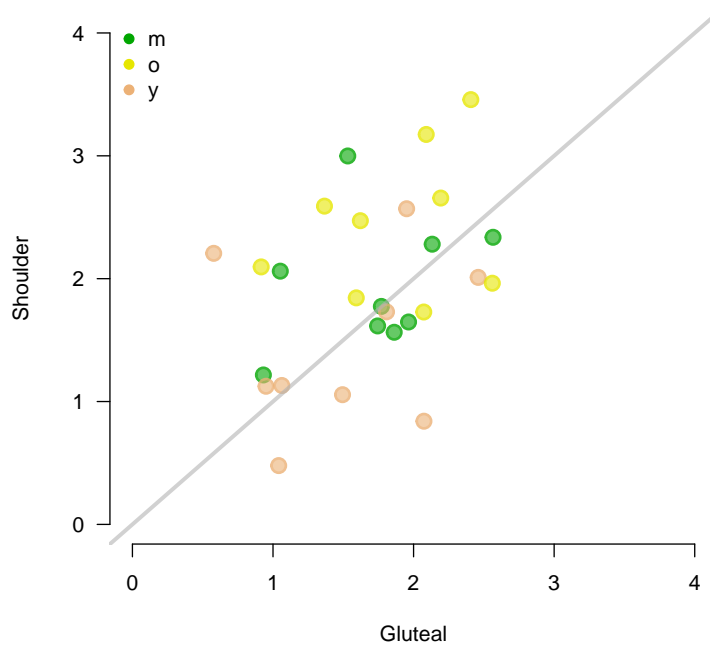

### 3.39 BACE2

| Parameter | Value                           |
|-----------|---------------------------------|
| gene_name | BACE2                           |
| gene_id   | ENSG00000182240                 |
| maxald    | 2384                            |
| old       | up                              |
| seqid     | 21                              |
| strand    | +                               |
| start     | 41167801                        |
| end       | 41282518                        |
| descr     | beta-site APP-cleaving enzyme 2 |

Table 40: Gene identification

#### Gene expression estimates for Age

#### Influence of UV exposition on gene expression

Figure 229: Gene expression estimates based on CPM (SummarizeOveraps)  
Age related expression of BACE2

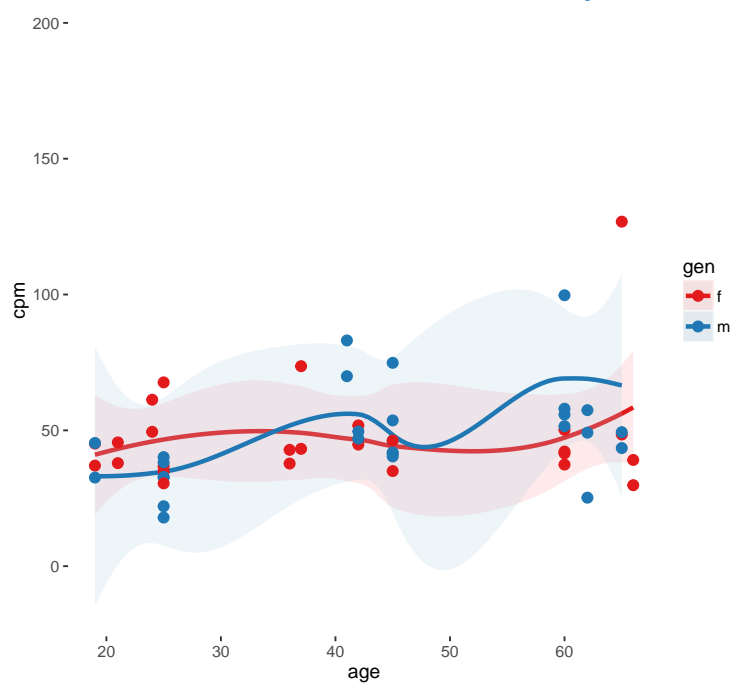

Figure 230: edgeR QLF test based CPM estimates  
Age related expression of BACE2

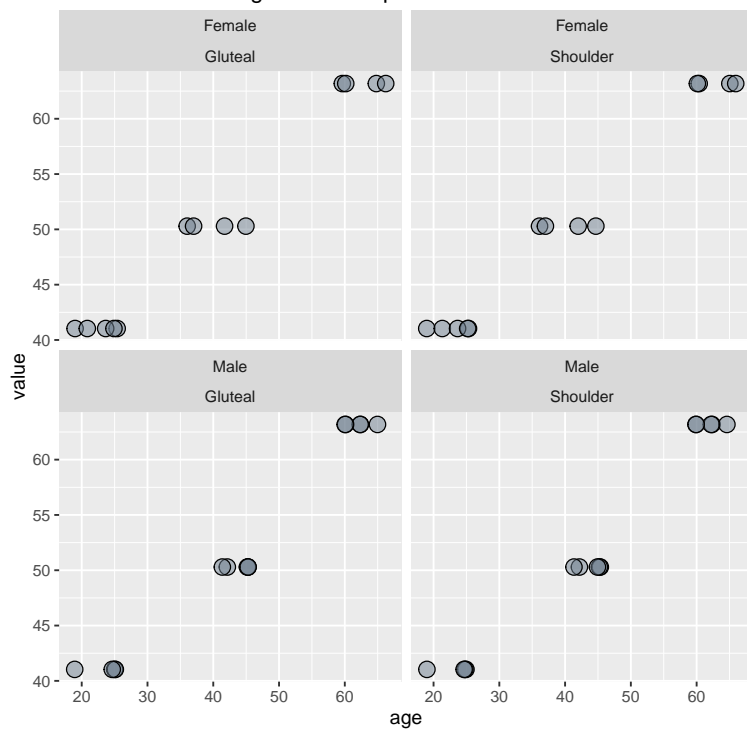



Figure 231: ReadExpSet based genewise CPM estimates  
Age related expression of BACE2

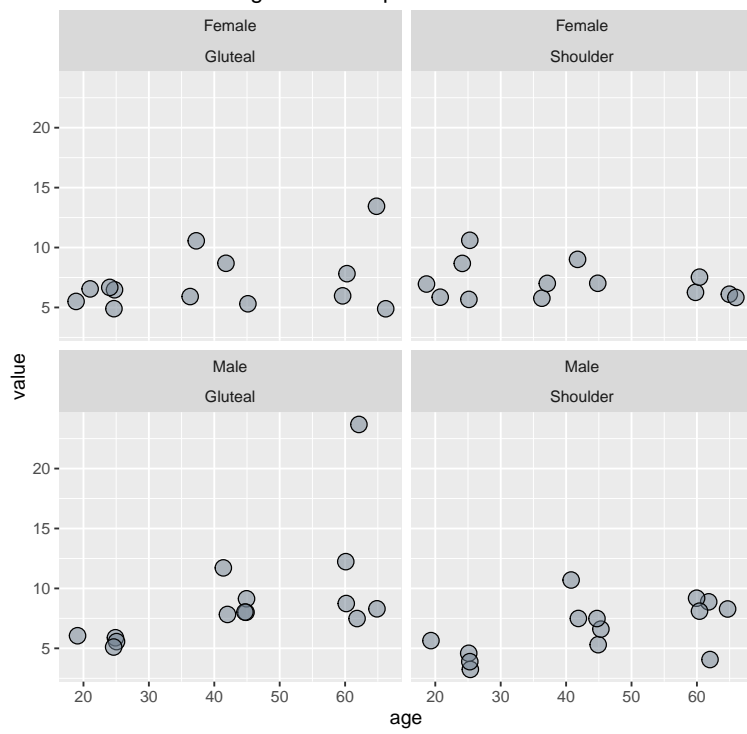

Figure 232: Loess regression for exon align depth

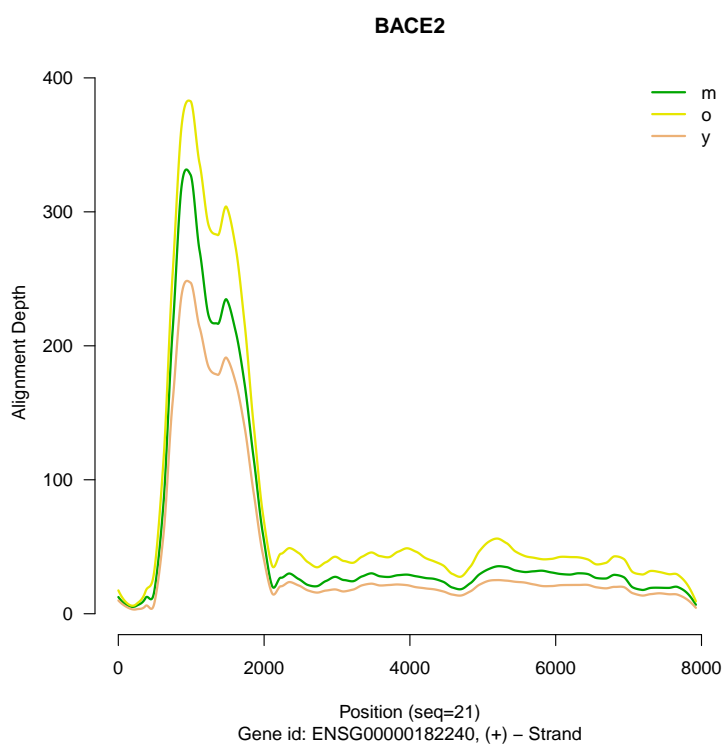

Figure 233: edgeR QLF test based CPM estimates

**Fitted read count values for gene BACE2**

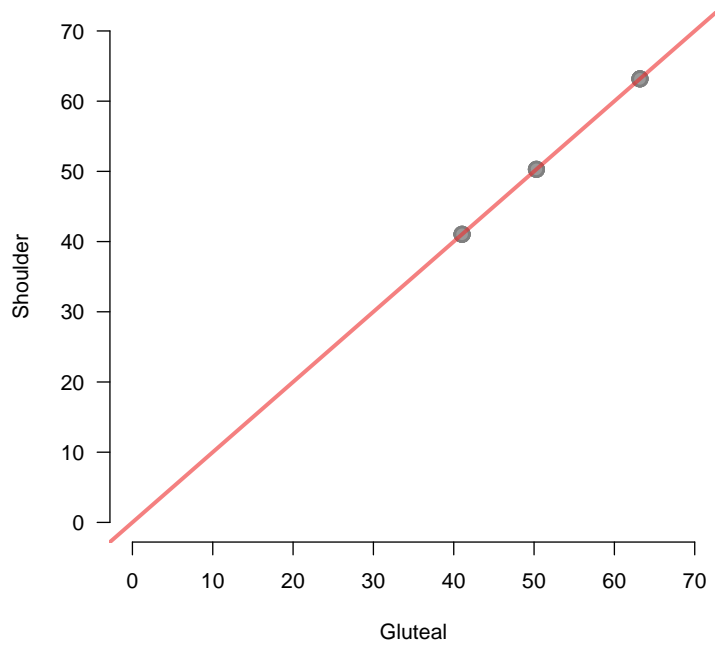

Figure 234: ReadExpSet based genewise CPM estimates

**Maximal gapped alignment depth for gene BACE2**

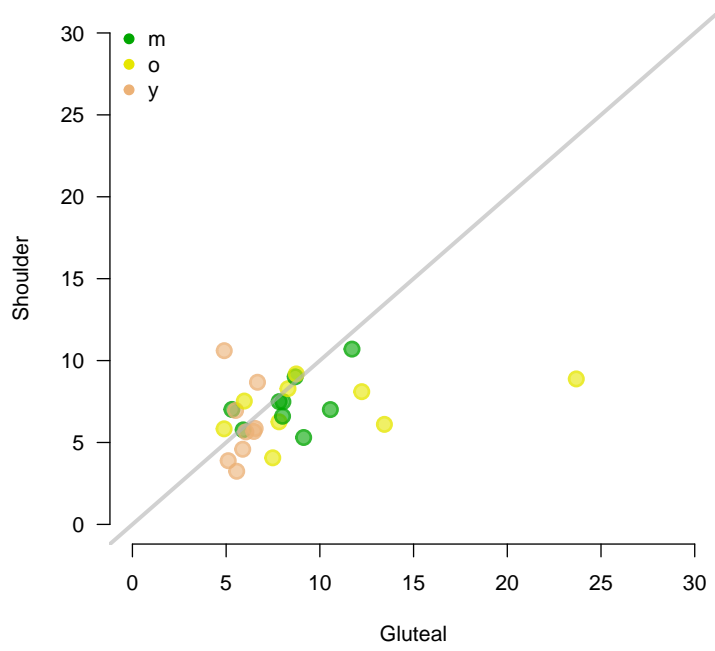

### 3.40 ADGRL4

| Parameter | Value                                  |
|-----------|----------------------------------------|
| gene_name | ADGRL4                                 |
| gene_id   | ENSG00000162618                        |
| maxald    | 524                                    |
| old       | up                                     |
| seqid     | 1                                      |
| strand    | -                                      |
| start     | 78889764                               |
| end       | 79006718                               |
| descr     | adhesion G protein-coupled receptor L4 |

Table 41: Gene identification

#### Gene expression estimates for Age

#### Influence of UV exposition on gene expression

Figure 235: Gene expression estimates based on CPM (SummarizeOverlaps)  
Age related expression of ADGRL4

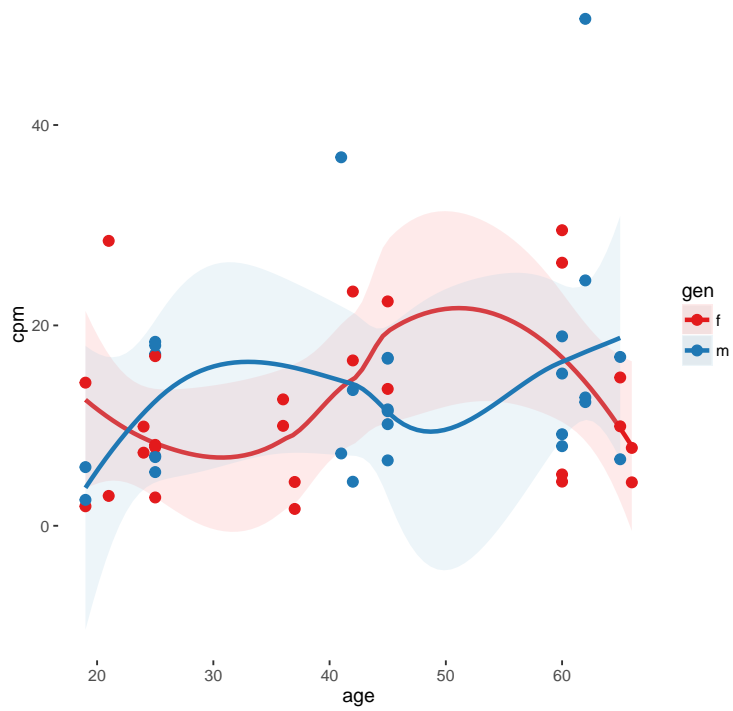

Figure 236: edgeR QLF test based CPM estimates  
Age related expression of ADGRL4

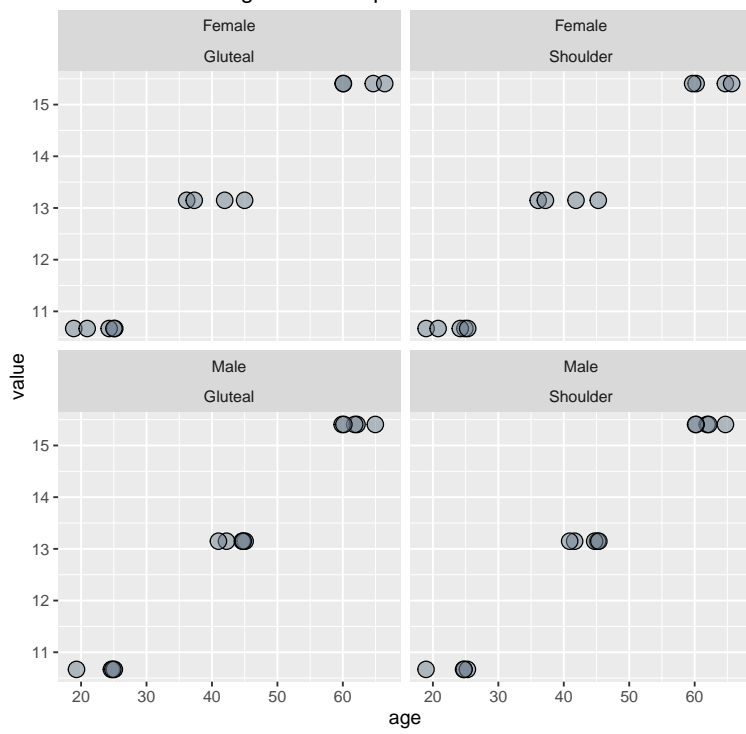

Figure 237: ReadExpSet based genewise CPM estimates  
Age related expression of ADGRL4

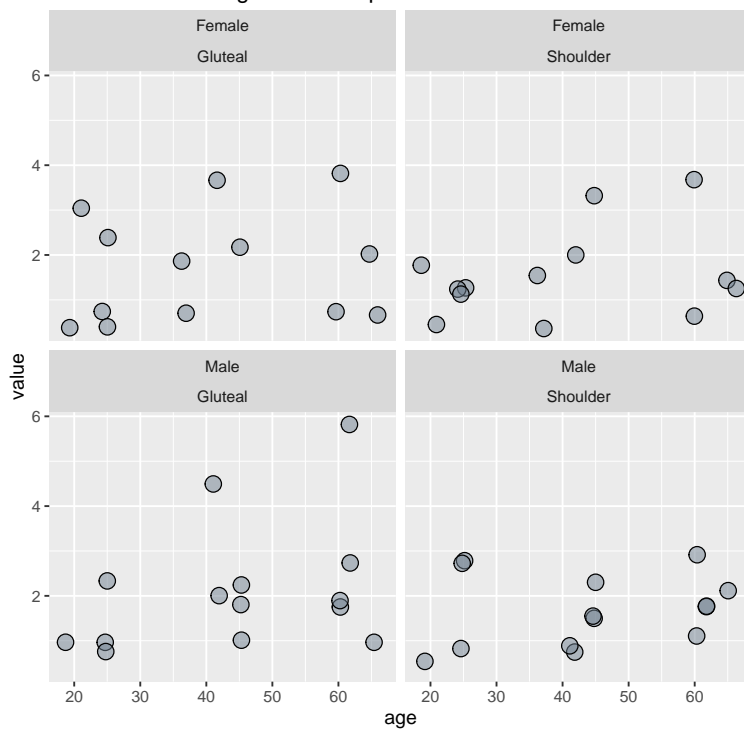



Figure 238: Loess regression for exon align depth

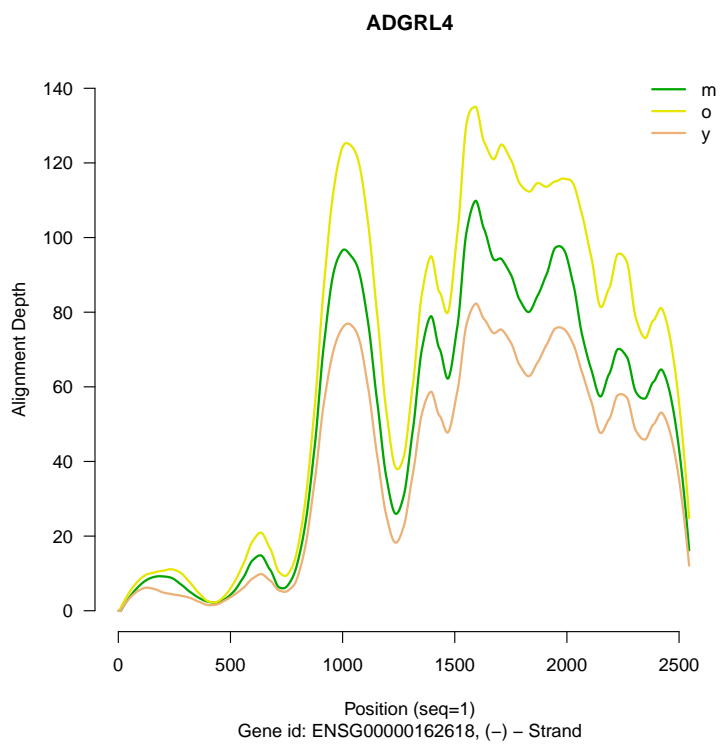

Figure 239: edgeR QLF test based CPM estimates

**Fitted read count values for gene ADGRL4**

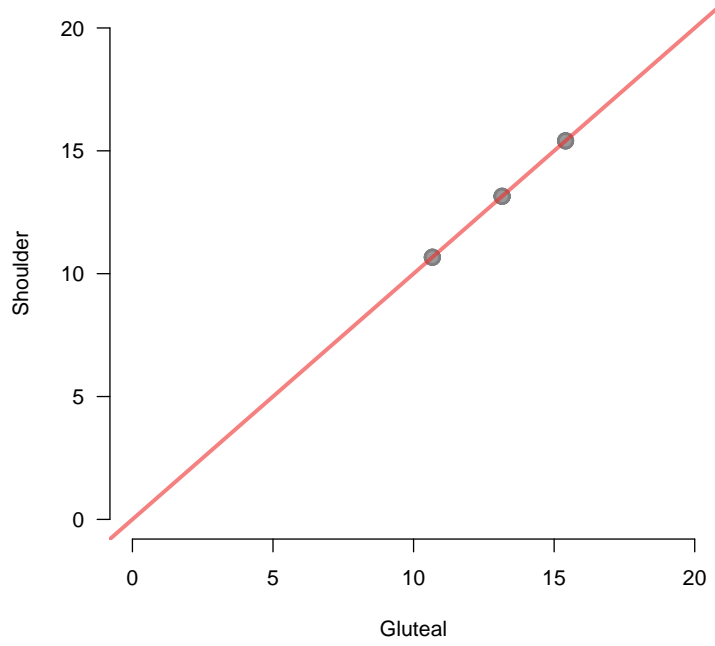

Figure 240: ReadExpSet based genewise CPM estimates

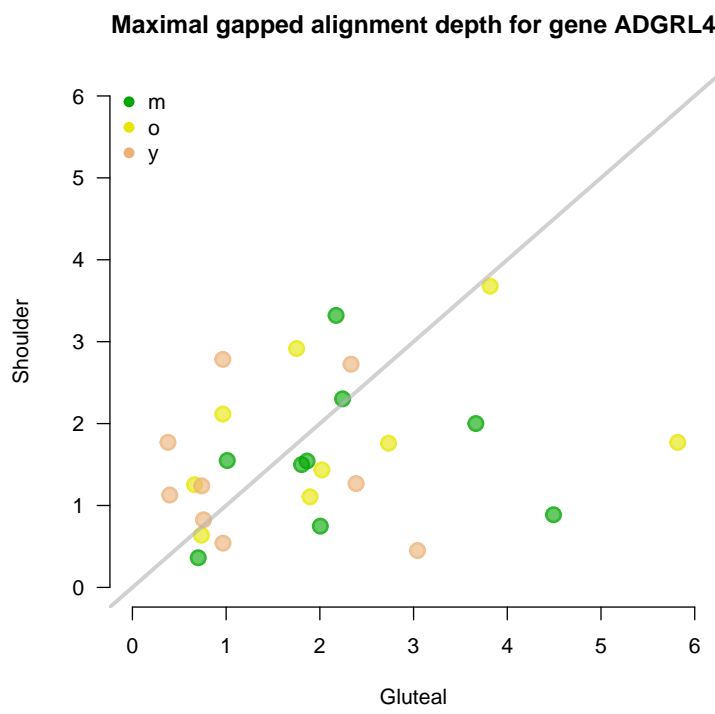

### 3.41 ROBO1

| Parameter | Value                          |
|-----------|--------------------------------|
| gene_name | ROBO1                          |
| gene_id   | ENSG00000169855                |
| maxald    | 826                            |
| old       | up                             |
| seqid     | 3                              |
| strand    | -                              |
| start     | 78597240                       |
| end       | 79767815                       |
| descr     | roundabout guidance receptor 1 |

Table 42: Gene identification

#### Gene expression estimates for Age

#### Influence of UV exposition on gene expression

Figure 241: Gene expression estimates based on CPM (SummarizeOverlaps)  
Age related expression of ROBO1

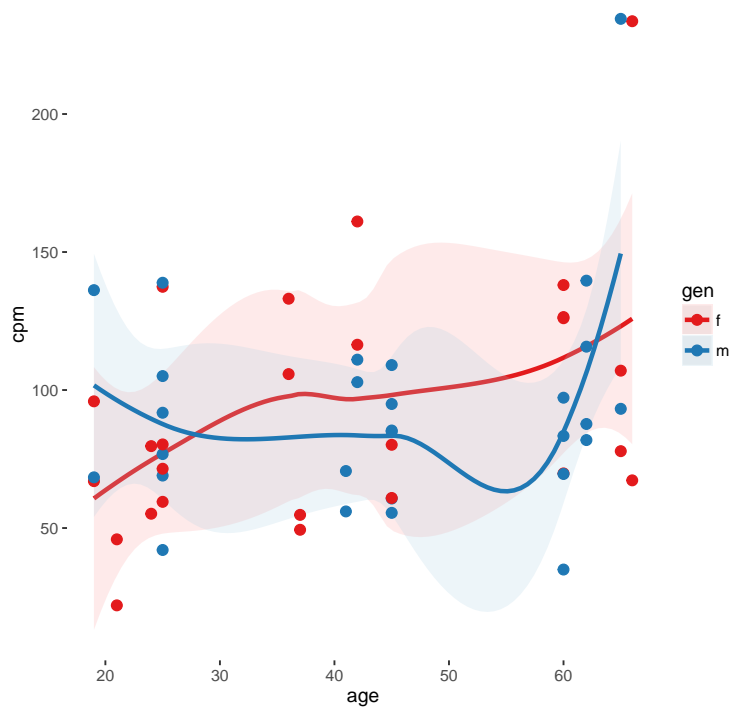

Figure 242: edgeR QLF test based CPM estimates  
Age related expression of ROBO1

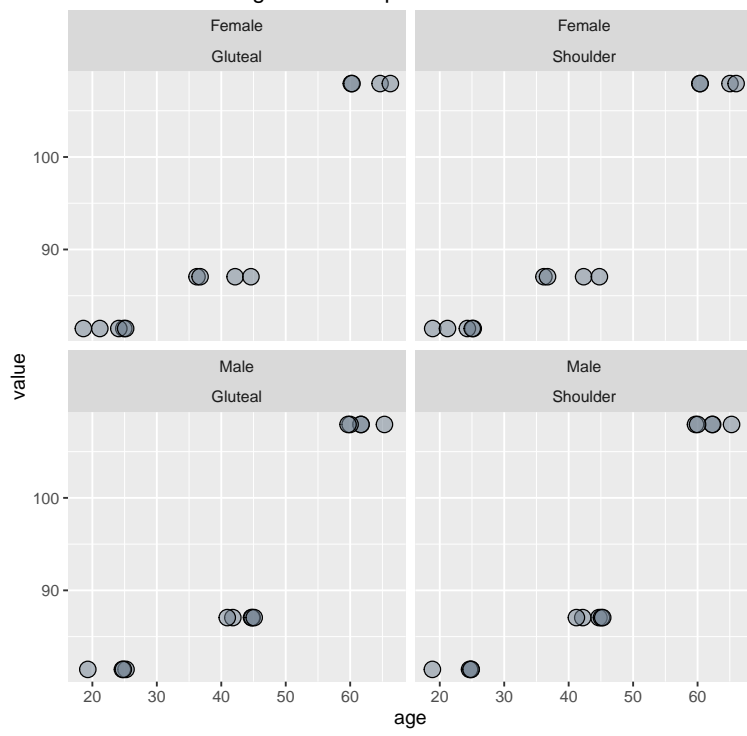

Figure 243: ReadExpSet based genewise CPM estimates  
Age related expression of ROBO1

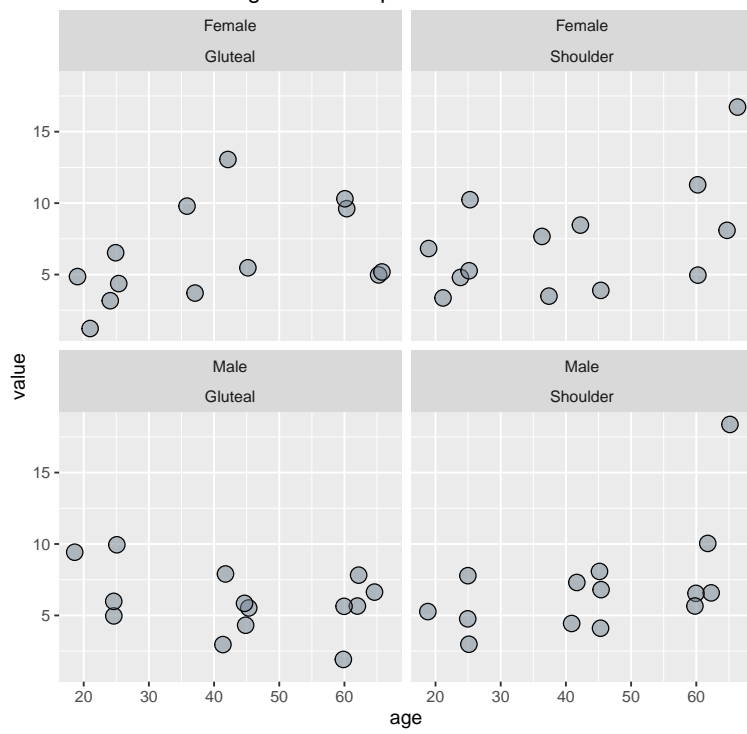

Figure 244: Loess regression for exon align depth

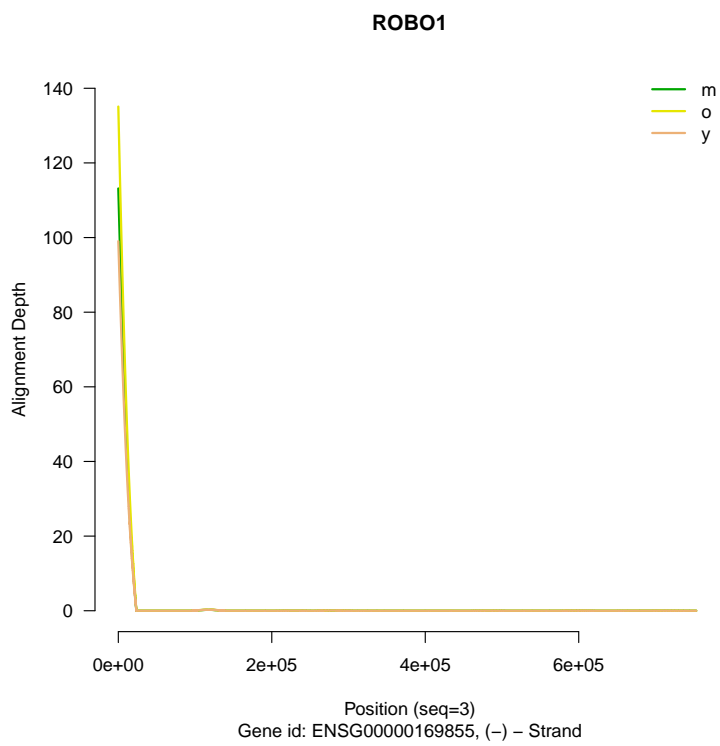



Figure 245: edgeR QLF test based CPM estimates

**Fitted read count values for gene ROBO1**

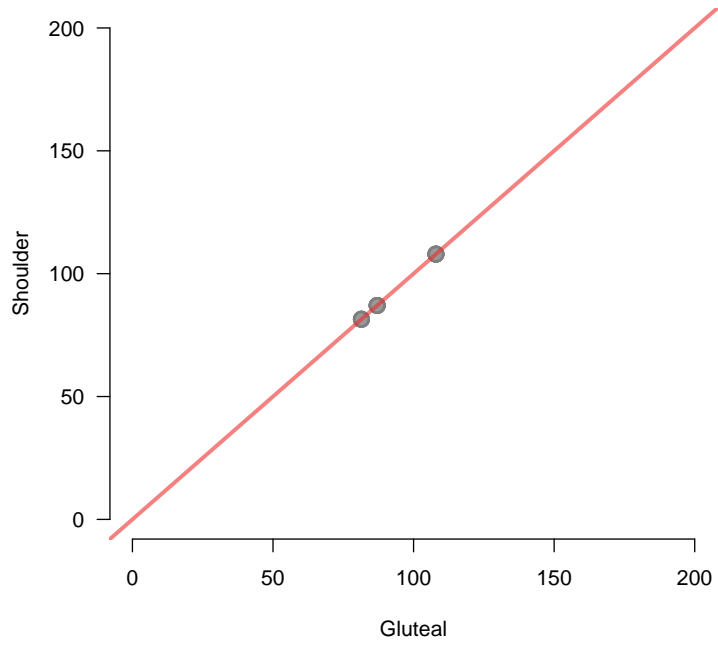

Figure 246: ReadExpSet based genewise CPM estimates

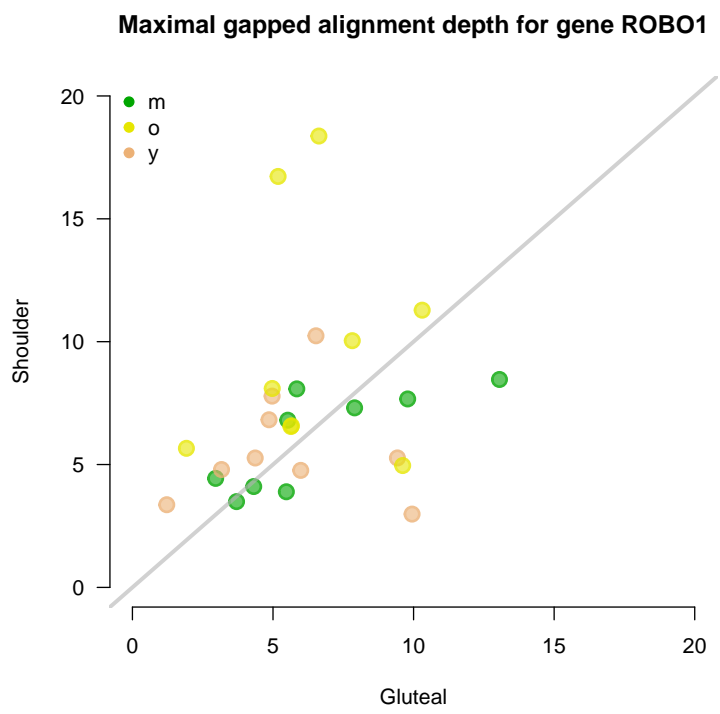

### 3.42 KCNC4

| Parameter | Value                                                               |
|-----------|---------------------------------------------------------------------|
| gene_name | KCNC4                                                               |
| gene_id   | ENSG00000116396                                                     |
| maxald    | 187                                                                 |
| old       | down                                                                |
| seqid     | 1                                                                   |
| strand    | +                                                                   |
| start     | 110211343                                                           |
| end       | 110283100                                                           |
| descr     | potassium channel, voltage gated Shaw related subfamily C, member 4 |

Table 43: Gene identification

### Gene expression estimates for Age

Figure 247: Gene expression estimates based on CPM (SummarizeOverlaps)  
Age related expression of KCNC4

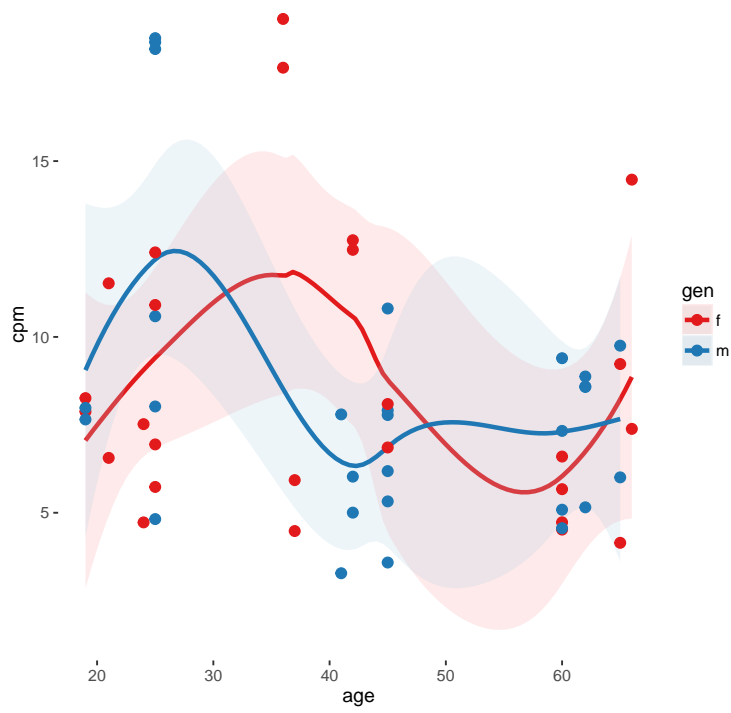

### Influence of UV exposition on gene expression

Figure 248: edgeR QLF test based CPM estimates  
Age related expression of KCNC4

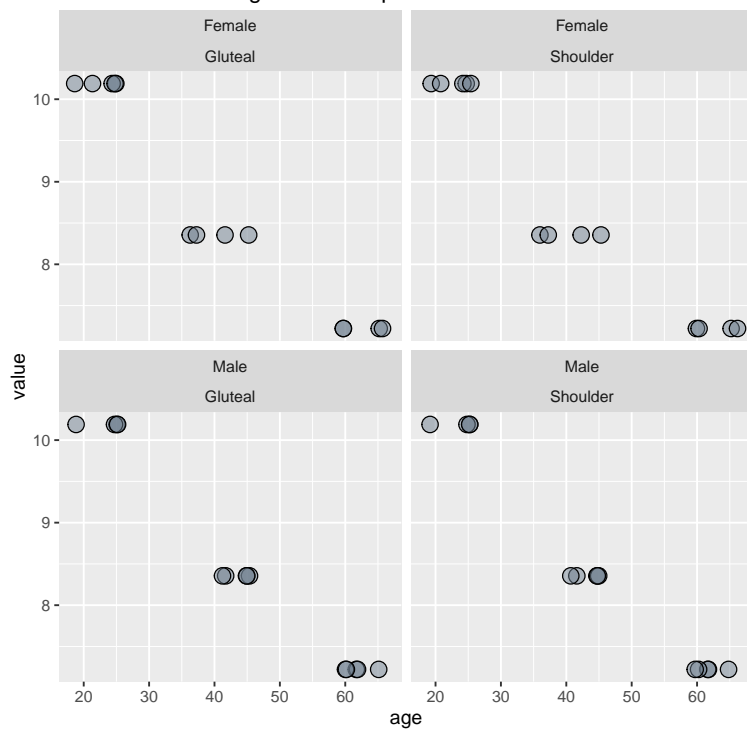

Figure 249: ReadExpSet based genewise CPM estimates  
Age related expression of KCNC4

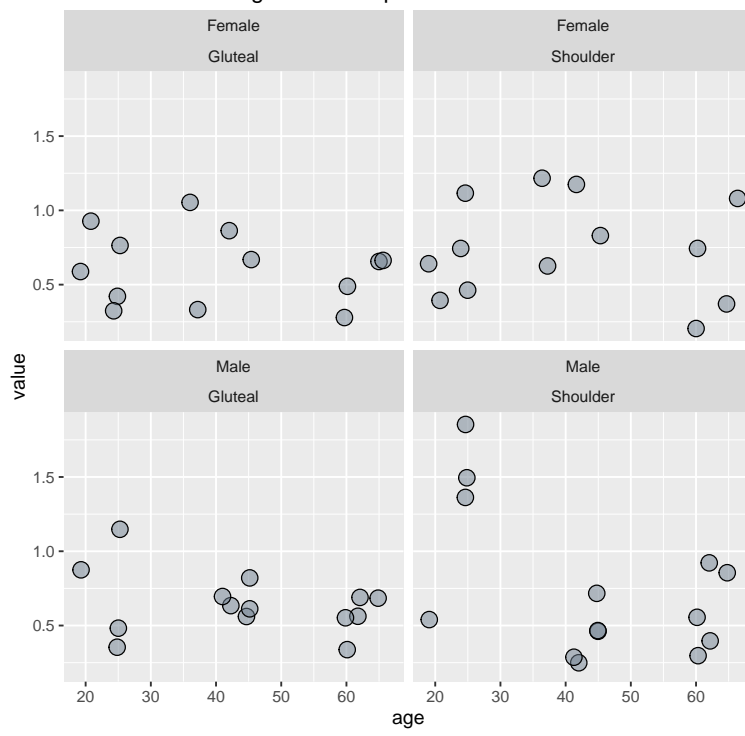

Figure 250: Loess regression for exon align depth

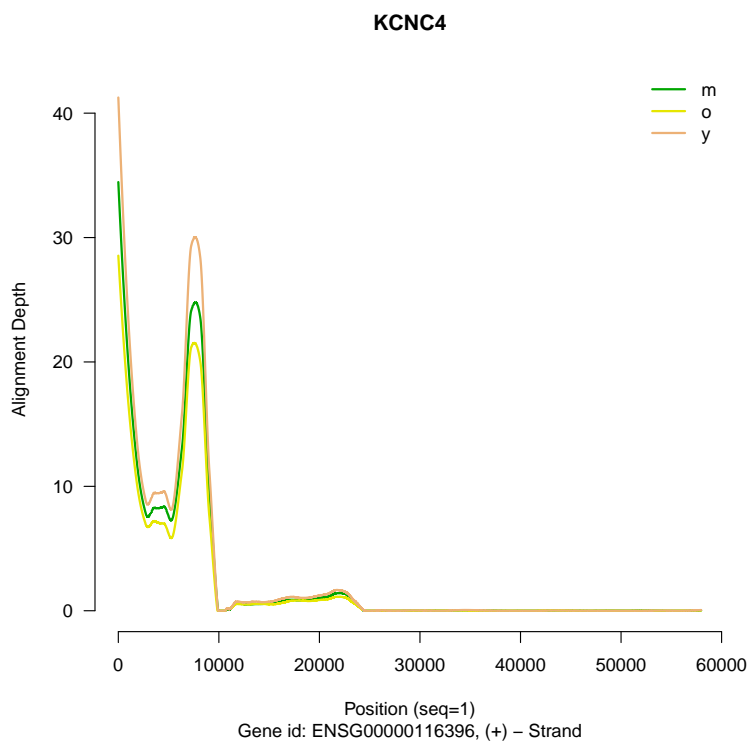

Figure 251: edgeR QLF test based CPM estimates

**Fitted read count values for gene KCNC4**

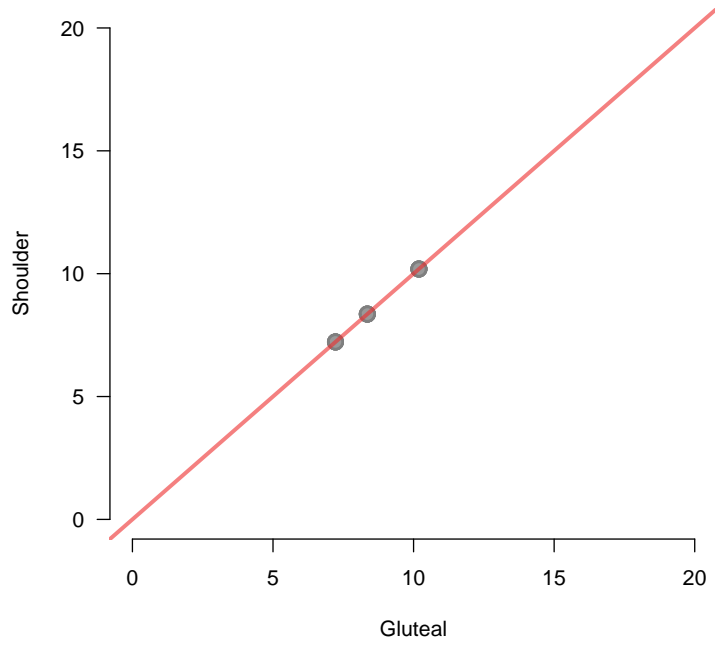



Figure 252: ReadExpSet based genewise CPM estimates

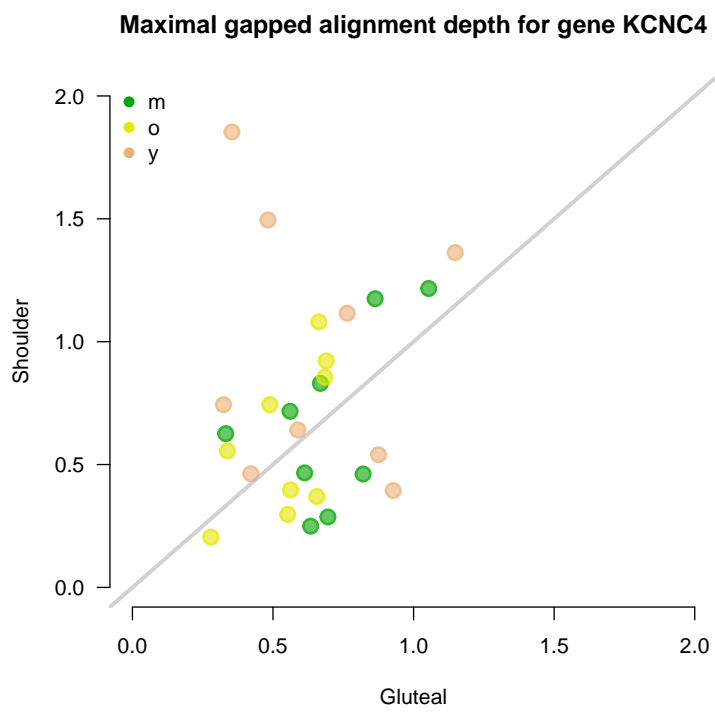

Supplement: pone.0175657.s003.pdf [file pone.0175657.s003.pdf]
