# Supplementary material for: Age, gender and UV-exposition related effects on gene expression in in vivo aged short term cultivated human dermal fibroblasts
Source: PLoS One. 2017 May 5;12(5):e0175657. doi: 10.1371/journal.pone.0175657 (PMC5419556; doi:10.1371/journal.pone.0175657)
Supplement: S1 File — Spreadsheet file containing the following tables: Age_MALDR_DE_genes: Listed age-related differential expressed (age MAR) genes. Age_MALDR_GO: Listed enriched GO terms for age MAR genes. Age_MALDR_KEGG: Listed enriched KEGG pathways for age MAR genes. Gender_EQLF_DE_genes: Listed gender related differential expressed (gender DE) genes. Gender_EQLF_GO: Listed enriched GO terms for gender DE genes. Gender_EQLF_KEGG: Listed enriched KEGG pathways for gender DE genes. Location_EQLF_DE_genes: Listed location related differential expressed (gender DE) genes. Location_EQLF_GO: Listed enriched GO terms for location DE genes. Location_EQLF_KEGG: Listed enriched KEGG pathways for location DE genes. Literature_selected_genes: Listed DE values for genes associated with senescence or fibroblast ageing. (XLSX) [file pone.0175657.s001.xlsx]

## Sheet: Age_MALDR_DE_genes
ID	gene_name	synonym	functional group	maxald	old	gene_id	seqid	strand	start	end	descr	hgncid	entrez
1	ATOH8		bHLH transcripton factor	4308	down	ENSG00000168874	2	+	85751344	85788066	atonal bHLH transcription factor 8	24126	84913
2	PODXL	podocalyxin	Membrane protein, cell adhesion	3927	down	ENSG00000128567	7	-	131500262	131558217	podocalyxin-like	9171	5420
3	SNAI1	SNAIL	transcription factor	4575	down	ENSG00000124216	20	+	49982999	49988886	snail family zinc finger 1	11128	6615
4	ID3		bHLH inhibitor	19530	down	ENSG00000117318	1	-	23557918	23559794	inhibitor of DNA binding 3, dominant negative helix-loop-helix protein	5362	3399
5	SPHK1		kinase	6585	down	ENSG00000176170	17	+	76376584	76387860	sphingosine kinase 1	11240	8877
6	ID1		bHLH inhibitor	14913	down	ENSG00000125968	20	+	31605283	31606515	inhibitor of DNA binding 1, dominant negative helix-loop-helix protein	5360	3397
7	ERRFI1	MIG-6	Cytosolic adaptor/scaffold protein	1776	down	ENSG00000116285	1	-	8004404	8026308	ERBB receptor feedback inhibitor 1	18185	54206
8	PENK	preproenkephalin	endogene opioid precursor	2554	up	ENSG00000181195	8	-	56436674	56446734	proenkephalin	8831	5179
9	SEPT5	HCDCREL-1	cell skeleton / P-loop	1468	down	ENSG00000184702	22	+	19714464	19724772	septin 5	9164	5413
10	CPZ		metallo carboxypeptidase	2585	up	ENSG00000109625	4	+	8592660	8619759	carboxypeptidase Z	2333	8532
11	PRPS1	CMTX5, DFNX1, PRS I	Enzyme, nucleotide synthesis	5550	down	ENSG00000147224	X	+	107628424	107651026	phosphoribosyl pyrophosphate synthetase 1	9462	5631
12	MEG3		lncRNA regulating p53	3031	down	ENSG00000214548	14	+	100779410	100861031	maternally expressed 3 (non-protein coding)	14575	55384
13	CNN1	calponin 1	actin regulating protein	16224	down	ENSG00000130176	19	+	11538717	11550323	calponin 1, basic, smooth muscle	2155	1264
14	STC1		Ca/Ph regulating, Mitochondrial electron transport	1877	up	ENSG00000159167	8	-	23841915	23854807	stanniocalcin 1	11373	6781
15	KIAA1324L	EIG121L, FLJ31340	Estrogen induced protein	1751	up	ENSG00000164659	7	-	86876906	87059699	KIAA1324-like	21945	222223
16	TRNP1		cerebral cortex expansion	3613	down	ENSG00000253368	1	+	26993707	27000898	TMF1-regulated nuclear protein 1	34348	388610
17	HSPB7	HSP27	Heat shock protein	14954	down	ENSG00000173641	1	-	16014028	16019594	heat shock 27kDa protein family, member 7 (cardiovascular)	5249	27129
18	PRRX2	PMX2, PRX2	periredoxin	6616	down	ENSG00000167157	9	+	129665641	129722674	paired related homeobox 2	21338	51450
19	SMAD7	MADH7, MADH8	TGFB effector	3768	down	ENSG00000101665	18	-	48919853	48950711	SMAD family member 7	6773	4092
20	FAM83G	SMAD1-ass, JV4-1, MADR1	TGFB effector	523	down	ENSG00000188522	17	-	18968789	19004804	family with sequence similarity 83, member G	32554	644815
21	DDR1	CD167, RTK6	collagen sensing receptor kinase	606	down	ENSG00000204580	6	+	30876421	30900156	discoidin domain receptor tyrosine kinase 1	2730	780
22	PPP1R3C	PTG	Protein phosphatase subunit	1889	down	ENSG00000119938	10	-	91628442	91633054	protein phosphatase 1, regulatory subunit 3C	9293	5507
23	EVA1A	TMEM166, FAM176A	ER membrane protein	862	down	ENSG00000115363	2	-	75469302	75569722	eva-1 homolog A (C. elegans)	25816	84141
24	CRISPLD2	LGL1, LCRISP2	LPS binding protein	2516	down	ENSG00000103196	16	+	84819984	84920768	cysteine-rich secretory protein LCCL domain containing 2	25248	83716
25	RP11-309L24.6			6288	down	ENSG00000224163	7	-	128912732	128914063			NA
26	ZNF385D	FLJ22419, ZNF659		529	up	ENSG00000151789	3	-	21415071	22373321	zinc finger protein 385D	26191	79750
27	FGFRL1		FGF receptor	1174	down	ENSG00000127418	4	+	1009936	1026897	fibroblast growth factor receptor-like 1	3693	53834
28	CKB		Creatin kinase (brain type)	2224	down	ENSG00000166165	14	-	103519659	103523111	creatine kinase, brain	1991	1152
29	FILIP1L	DOC-1, GIP130		2028	down	ENSG00000168386	3	-	99830141	100114513	filamin A interacting protein 1-like	24589	11259
30	GJA1	CX43, ODD, SDTY3	Gap junction constituting protein	12333	up	ENSG00000152661	6	+	121435692	121449727	gap junction protein, alpha 1, 43kDa	4274	2697
31	ENC1	NRP/B, KLHL37, PIG10, TP53I10	actin binding protein	1200	down	ENSG00000171617	5	-	74627406	74641424	ectodermal-neural cortex 1 (with BTB domain)	3345	8507
32	SH2D4A	SH2A, FLJ20967, PPP1R38	adaptor protein on T-cells	5544	down	ENSG00000104611	8	+	19313617	19396218	SH2 domain containing 4A	26102	63898
33	ARHGAP23P1			763	down	ENSG00000260781	16	-	33907419	33937167	Rho GTPase activating protein 23 pseudogene 1	45039	NA
34	SERTAD1	SEI1, TRIP-Br1	Transciptional activator	2018	down	ENSG00000197019	19	-	40421592	40426025	SERTA domain containing 1	17932	29950
35	FGF13	FGF2, FHF2	Fibroblast growth factor, Na+channel, intracellular singalling protein	345	up	ENSG00000129682	X	-	138614731	139222777	fibroblast growth factor 13	3670	2258
36	EHD1	FLJ42622, FLJ44618, H-PAST, HPAST1	Proteinrecycling receptor	2871	down	ENSG00000110047	11	-	64851642	64888296	EH-domain containing 1	3242	10938
37	USP41		Deubiquitating enzyme	155	up	ENSG00000161133	22	-	20350578	20390758	ubiquitin specific peptidase 41	20070	NA
38	ACSS3	FLJ21963	AcylCoA synthetase	201	down	ENSG00000111058	12	+	80936414	81261205	acyl-CoA synthetase short-chain family member 3	24723	79611
39	BACE2	ALP56, CEAP1, DRAP	Secretase (Amyloid Aß proteolysis)	2384	up	ENSG00000182240	21	+	41167801	41282518	beta-site APP-cleaving enzyme 2	934	25825
40	ADGRL4	ELTD1	G-protein coupled receptor	524	up	ENSG00000162618	1	-	78889764	79006718	adhesion G protein-coupled receptor L4	20822	64123
41	ROBO1		Transmembrane receptor	826	up	ENSG00000169855	3	-	78597240	79767815	roundabout guidance receptor 1	10249	6091
42	KCNC4	HKSHIIIC, Kv3.4	Voltage gated Kalium channel	187	down	ENSG00000116396	1	+	110211343	110283100	potassium channel, voltage gated Shaw related subfamily C, member 4	6236	3749

## Sheet: Age_MALDR_GO
GoId	Term	Ont	N	DE	P.DE
GO:0090257	regulation of muscle system process	BP	107	6	1.0255e-06
GO:0009887	organ morphogenesis	BP	575	11	1.15568e-06
GO:0009653	anatomical structure morphogenesis	BP	1813	18	2.98722e-06
GO:0048513	organ development	BP	1846	18	3.89408e-06
GO:0006937	regulation of muscle contraction	BP	77	5	4.30474e-06
GO:0060429	epithelium development	BP	667	11	4.9073e-06
GO:0044057	regulation of system process	BP	218	7	5.02165e-06
GO:0035295	tube development	BP	418	9	5.0765e-06
GO:0048731	system development	BP	2691	21	1.34297e-05
GO:0016477	cell migration	BP	742	11	1.35648e-05
GO:0072358	cardiovascular system development	BP	610	10	1.5423e-05
GO:0072359	circulatory system development	BP	610	10	1.5423e-05
GO:0048870	cell motility	BP	793	11	2.53223e-05
GO:0051674	localization of cell	BP	793	11	2.53223e-05
GO:0060373	regulation of ventricular cardiac muscle cell membrane depolarization	BP	3	2	2.99594e-05
GO:0003012	muscle system process	BP	194	6	3.17418e-05
GO:0060426	lung vasculature development	BP	4	2	5.97975e-05
GO:0008283	cell proliferation	BP	1223	13	6.44987e-05
GO:0030855	epithelial cell differentiation	BP	327	7	6.88843e-05
GO:0051241	negative regulation of multicellular organismal process	BP	584	9	7.24922e-05
GO:0003158	endothelium development	BP	71	4	7.47847e-05
GO:0044707	single-multicellular organism process	BP	3806	24	8.0592e-05
GO:0045595	regulation of cell differentiation	BP	913	11	9.24309e-05
GO:0007275	multicellular organismal development	BP	3047	21	9.86092e-05
GO:0009888	tissue development	BP	1092	12	9.87945e-05
GO:0060536	cartilage morphogenesis	BP	5	2	9.94607e-05
GO:0042127	regulation of cell proliferation	BP	932	11	0.000111299
GO:0051239	regulation of multicellular organismal process	BP	1482	14	0.000111408
GO:0008016	regulation of heart contraction	BP	80	4	0.000119244
GO:0006936	muscle contraction	BP	153	5	0.000119425
GO:0032501	multicellular organismal process	BP	3923	24	0.000138133
GO:0048729	tissue morphogenesis	BP	391	7	0.000209724
GO:0001944	vasculature development	BP	394	7	0.000219805
GO:0048856	anatomical structure development	BP	3216	21	0.000226872
GO:0001886	endothelial cell morphogenesis	BP	8	2	0.000276803
GO:0055117	regulation of cardiac muscle contraction	BP	41	3	0.000297866
GO:0050678	regulation of epithelial cell proliferation	BP	190	5	0.000327858
GO:0006942	regulation of striated muscle contraction	BP	44	3	0.000367623
GO:0044291	cell-cell contact zone	CC	45	3	0.000393012
GO:1903522	regulation of blood circulation	BP	111	4	0.000420575
GO:0043542	endothelial cell migration	BP	112	4	0.000435154
GO:2000810	regulation of bicellular tight junction assembly	BP	10	2	0.000443064
GO:0007507	heart development	BP	322	6	0.000508126
GO:0003008	system process	BP	757	9	0.000511886
GO:0048514	blood vessel morphogenesis	BP	326	6	0.000542426
GO:0040011	locomotion	BP	1117	11	0.000545652
GO:0060322	head development	BP	462	7	0.00057654
GO:0040012	regulation of locomotion	BP	468	7	0.000622654
GO:0051093	negative regulation of developmental process	BP	468	7	0.000622654
GO:0010769	regulation of cell morphogenesis involved in differentiation	BP	220	5	0.000641085
GO:0051270	regulation of cellular component movement	BP	472	7	0.000655001
GO:0050793	regulation of developmental process	BP	1341	12	0.00068047
GO:2000026	regulation of multicellular organismal development	BP	975	10	0.000759342
GO:0050673	epithelial cell proliferation	BP	232	5	0.000815016
GO:0002064	epithelial cell development	BP	133	4	0.000831838
GO:0098801	regulation of renal system process	BP	14	2	0.000888752
GO:0005911	cell-cell junction	CC	237	5	0.000897061
GO:0045446	endothelial cell differentiation	BP	62	3	0.00100889
GO:0001568	blood vessel development	BP	376	6	0.00114333
GO:0044767	single-organism developmental process	BP	3588	21	0.00114456
GO:0010771	negative regulation of cell morphogenesis involved in differentiation	BP	65	3	0.00115752
GO:0001503	ossification	BP	251	5	0.00115973
GO:0060541	respiratory system development	BP	146	4	0.00117733
GO:0035239	tube morphogenesis	BP	253	5	0.00120146
GO:0006928	movement of cell or subcellular component	BP	1231	11	0.00123593
GO:0001649	osteoblast differentiation	BP	148	4	0.0012382
GO:0045601	regulation of endothelial cell differentiation	BP	17	2	0.00132021
GO:0032502	developmental process	BP	3638	21	0.00139401
GO:0001662	behavioral fear response	BP	18	2	0.00148224
GO:0002209	behavioral defense response	BP	18	2	0.00148224
GO:1990090	cellular response to nerve growth factor stimulus	BP	18	2	0.00148224
GO:0010631	epithelial cell migration	BP	159	4	0.00161303
GO:0090132	epithelium migration	BP	159	4	0.00161303
GO:0042596	fear response	BP	19	2	0.00165328
GO:1990089	response to nerve growth factor	BP	19	2	0.00165328
GO:0060412	ventricular septum morphogenesis	BP	19	2	0.00165328
GO:0030334	regulation of cell migration	BP	405	6	0.00167348
GO:0090130	tissue migration	BP	161	4	0.0016888
GO:0007417	central nervous system development	BP	562	7	0.00181474
GO:0030856	regulation of epithelial cell differentiation	BP	76	3	0.00181831
GO:0005179	hormone activity	MF	20	2	0.00183327
GO:0007166	cell surface receptor signaling pathway	BP	1720	13	0.00188313
GO:0004871	signal transducer activity	MF	569	7	0.00194783
GO:0007399	nervous system development	BP	1516	12	0.00202092
GO:0071364	cellular response to epidermal growth factor stimulus	BP	21	2	0.00202215
GO:0086004	regulation of cardiac muscle cell contraction	BP	21	2	0.00202215
GO:1903115	regulation of actin filament-based movement	BP	21	2	0.00202215
GO:0045667	regulation of osteoblast differentiation	BP	79	3	0.0020319
GO:0004888	transmembrane signaling receptor activity	MF	285	5	0.00203233
GO:2000145	regulation of cell motility	BP	431	6	0.00229277
GO:0007420	brain development	BP	432	6	0.00231964
GO:0003254	regulation of membrane depolarization	BP	23	2	0.00242639
GO:0022603	regulation of anatomical structure morphogenesis	BP	599	7	0.002607
GO:0032651	regulation of interleukin-1 beta production	BP	24	2	0.00264164
GO:0050680	negative regulation of epithelial cell proliferation	BP	87	3	0.00267593
GO:0030509	BMP signaling pathway	BP	88	3	0.00276428
GO:0001937	negative regulation of endothelial cell proliferation	BP	25	2	0.00286555
GO:0070849	response to epidermal growth factor	BP	25	2	0.00286555
GO:0071772	response to BMP	BP	90	3	0.00294636
GO:0071773	cellular response to BMP stimulus	BP	90	3	0.00294636
GO:0071385	cellular response to glucocorticoid stimulus	BP	26	2	0.00309809
GO:0003294	atrial ventricular junction remodeling	BP	1	1	0.00320567
GO:0010232	vascular transport	BP	1	1	0.00320567
GO:0010645	regulation of cell communication by chemical coupling	BP	1	1	0.00320567
GO:0010652	positive regulation of cell communication by chemical coupling	BP	1	1	0.00320567
GO:0060156	milk ejection	BP	1	1	0.00320567
GO:0010621	negative regulation of transcription by transcription factor localization	BP	1	1	0.00320567
GO:0036164	cell-abiotic substrate adhesion	BP	1	1	0.00320567
GO:0060806	negative regulation of cell differentiation involved in embryonic placenta development	BP	1	1	0.00320567
GO:0003421	growth plate cartilage axis specification	BP	1	1	0.00320567
GO:0003422	growth plate cartilage morphogenesis	BP	1	1	0.00320567
GO:0044722	renal phosphate excretion	BP	1	1	0.00320567
GO:1903402	regulation of renal phosphate excretion	BP	1	1	0.00320567
GO:1903403	negative regulation of renal phosphate excretion	BP	1	1	0.00320567
GO:0046521	sphingoid catabolic process	BP	1	1	0.00320567
GO:0086075	gap junction channel activity involved in cardiac conduction electrical coupling	MF	1	1	0.00320567
GO:1903763	gap junction channel activity involved in cell communication by electrical coupling	MF	1	1	0.00320567
GO:0005184	neuropeptide hormone activity	MF	1	1	0.00320567
GO:0002009	morphogenesis of an epithelium	BP	317	5	0.00322361
GO:0032611	interleukin-1 beta production	BP	27	2	0.00333919
GO:0060603	mammary gland duct morphogenesis	BP	27	2	0.00333919
GO:0010799	regulation of peptidyl-threonine phosphorylation	BP	27	2	0.00333919
GO:0003281	ventricular septum development	BP	27	2	0.00333919
GO:0060047	heart contraction	BP	95	3	0.00343341
GO:0003015	heart process	BP	96	3	0.00353638
GO:0006940	regulation of smooth muscle contraction	BP	28	2	0.00358881
GO:0071384	cellular response to corticosteroid stimulus	BP	28	2	0.00358881
GO:0032652	regulation of interleukin-1 production	BP	28	2	0.00358881
GO:0031344	regulation of cell projection organization	BP	329	5	0.00377945
GO:0045668	negative regulation of osteoblast differentiation	BP	29	2	0.00384688
GO:0033267	axon part	CC	99	3	0.00385659
GO:0003382	epithelial cell morphogenesis	BP	30	2	0.00411335
GO:0048523	negative regulation of cellular process	BP	2858	17	0.00420179
GO:0038023	signaling receptor activity	MF	340	5	0.00434694
GO:0060411	cardiac septum morphogenesis	BP	31	2	0.00438818
GO:0010558	negative regulation of macromolecule biosynthetic process	BP	1032	9	0.00447392
GO:0098590	plasma membrane region	CC	496	6	0.00459645
GO:0045596	negative regulation of cell differentiation	BP	345	5	0.00462413
GO:0032612	interleukin-1 production	BP	32	2	0.0046713
GO:0034405	response to fluid shear stress	BP	32	2	0.0046713
GO:0046928	regulation of neurotransmitter secretion	BP	32	2	0.0046713
GO:0070830	bicellular tight junction assembly	BP	32	2	0.0046713
GO:0048844	artery morphogenesis	BP	32	2	0.0046713
GO:0048487	beta-tubulin binding	MF	32	2	0.0046713
GO:0060089	molecular transducer activity	MF	669	7	0.00481588
GO:0001667	ameboidal-type cell migration	BP	216	4	0.00487193
GO:0021795	cerebral cortex cell migration	BP	33	2	0.00496266
GO:0014704	intercalated disc	CC	33	2	0.00496266
GO:0065007	biological regulation	BP	7206	31	0.00516894
GO:0031099	regeneration	BP	110	3	0.0051798
GO:0007517	muscle organ development	BP	221	4	0.00528174
GO:0043433	negative regulation of sequence-specific DNA binding transcription factor activity	BP	111	3	0.005312
GO:0031327	negative regulation of cellular biosynthetic process	BP	1060	9	0.00533971
GO:0060284	regulation of cell development	BP	514	6	0.00546389
GO:0007566	embryo implantation	BP	35	2	0.0055699
GO:0022604	regulation of cell morphogenesis	BP	361	5	0.00559633
GO:0030335	positive regulation of cell migration	BP	225	4	0.00562584
GO:0007167	enzyme linked receptor protein signaling pathway	BP	873	8	0.00563542
GO:0005886	plasma membrane	CC	2428	15	0.00567501
GO:0050789	regulation of biological process	BP	6880	30	0.00568456
GO:0001885	endothelial cell development	BP	36	2	0.00588568
GO:0004714	transmembrane receptor protein tyrosine kinase activity	MF	36	2	0.00588568
GO:0008015	blood circulation	BP	228	4	0.00589358
GO:0060562	epithelial tube morphogenesis	BP	228	4	0.00589358
GO:0045597	positive regulation of cell differentiation	BP	523	6	0.0059404
GO:0003013	circulatory system process	BP	229	4	0.00598469
GO:0030424	axon	CC	229	4	0.00598469
GO:0009890	negative regulation of biosynthetic process	BP	1079	9	0.00599874
GO:0061061	muscle structure development	BP	369	5	0.00613337
GO:2000147	positive regulation of cell motility	BP	231	4	0.00616973
GO:0051588	regulation of neurotransmitter transport	BP	37	2	0.00620949
GO:0005913	cell-cell adherens junction	CC	37	2	0.00620949
GO:0051094	positive regulation of developmental process	BP	705	7	0.00639922
GO:1903243	negative regulation of cardiac muscle hypertrophy in response to stress	BP	2	1	0.00640133
GO:0042536	negative regulation of tumor necrosis factor biosynthetic process	BP	2	1	0.00640133
GO:0030644	cellular chloride ion homeostasis	BP	2	1	0.00640133
GO:0038063	collagen-activated tyrosine kinase receptor signaling pathway	BP	2	1	0.00640133
GO:0010643	cell communication by chemical coupling	BP	2	1	0.00640133
GO:1903026	negative regulation of RNA polymerase II regulatory region sequence-specific DNA binding	BP	2	1	0.00640133
GO:0003104	positive regulation of glomerular filtration	BP	2	1	0.00640133
GO:1903365	regulation of fear response	BP	2	1	0.00640133
GO:1903367	positive regulation of fear response	BP	2	1	0.00640133
GO:2000822	regulation of behavioral fear response	BP	2	1	0.00640133
GO:2000987	positive regulation of behavioral fear response	BP	2	1	0.00640133
GO:0034418	urate biosynthetic process	BP	2	1	0.00640133
GO:0033634	positive regulation of cell-cell adhesion mediated by integrin	BP	2	1	0.00640133
GO:0021836	chemorepulsion involved in postnatal olfactory bulb interneuron migration	BP	2	1	0.00640133
GO:0050925	negative regulation of negative chemotaxis	BP	2	1	0.00640133
GO:0038062	protein tyrosine kinase collagen receptor activity	MF	2	1	0.00640133
GO:0004111	creatine kinase activity	MF	2	1	0.00640133
GO:0005007	fibroblast growth factor-activated receptor activity	MF	2	1	0.00640133
GO:0071253	connexin binding	MF	2	1	0.00640133
GO:0030617	transforming growth factor beta receptor, inhibitory cytoplasmic mediator activity	MF	2	1	0.00640133
GO:0008481	sphinganine kinase activity	MF	2	1	0.00640133
GO:0017050	D-erythro-sphingosine kinase activity	MF	2	1	0.00640133
GO:0043297	apical junction assembly	BP	38	2	0.00654128
GO:0060443	mammary gland morphogenesis	BP	38	2	0.00654128
GO:0022029	telencephalon cell migration	BP	38	2	0.00654128
GO:0043588	skin development	BP	120	3	0.00659391
GO:0051128	regulation of cellular component organization	BP	1521	11	0.00661169
GO:0030278	regulation of ossification	BP	121	3	0.00674673
GO:0051272	positive regulation of cellular component movement	BP	237	4	0.00674776
GO:0007178	transmembrane receptor protein serine/threonine kinase signaling pathway	BP	237	4	0.00674776
GO:0060840	artery development	BP	39	2	0.00688099
GO:0033555	multicellular organismal response to stress	BP	39	2	0.00688099
GO:0051216	cartilage development	BP	122	3	0.00690165
GO:0010975	regulation of neuron projection development	BP	241	4	0.00715251
GO:0040017	positive regulation of locomotion	BP	242	4	0.00725617
GO:0071944	cell periphery	CC	2491	15	0.00727025
GO:0030324	lung development	BP	125	3	0.00737912
GO:0021885	forebrain cell migration	BP	41	2	0.00758401
GO:0030323	respiratory tube development	BP	129	3	0.00804564
GO:0003279	cardiac septum development	BP	43	2	0.00831813
GO:0060048	cardiac muscle contraction	BP	44	2	0.00869672
GO:0048640	negative regulation of developmental growth	BP	44	2	0.00869672
GO:0048468	cell development	BP	1358	10	0.00878391
GO:0048519	negative regulation of biological process	BP	3065	17	0.00892363
GO:0019902	phosphatase binding	MF	135	3	0.00911035
GO:0001558	regulation of cell growth	BP	260	4	0.00929571
GO:0048646	anatomical structure formation involved in morphogenesis	BP	757	7	0.00934265
GO:0030279	negative regulation of ossification	BP	46	2	0.00947674
GO:0045602	negative regulation of endothelial cell differentiation	BP	3	1	0.00958702
GO:0010616	negative regulation of cardiac muscle adaptation	BP	3	1	0.00958702
GO:1903242	regulation of cardiac muscle hypertrophy in response to stress	BP	3	1	0.00958702
GO:0045196	establishment or maintenance of neuroblast polarity	BP	3	1	0.00958702
GO:0045200	establishment of neuroblast polarity	BP	3	1	0.00958702
GO:0055059	asymmetric neuroblast division	BP	3	1	0.00958702
GO:0021823	cerebral cortex tangential migration using cell-cell interactions	BP	3	1	0.00958702
GO:0021827	postnatal olfactory bulb interneuron migration	BP	3	1	0.00958702
GO:0060371	regulation of atrial cardiac muscle cell membrane depolarization	BP	3	1	0.00958702
GO:0010957	negative regulation of vitamin D biosynthetic process	BP	3	1	0.00958702
GO:0002118	aggressive behavior	BP	3	1	0.00958702
GO:0006015	5-phosphoribose 1-diphosphate biosynthetic process	BP	3	1	0.00958702
GO:0046391	5-phosphoribose 1-diphosphate metabolic process	BP	3	1	0.00958702
GO:0035385	Roundabout signaling pathway	BP	3	1	0.00958702
GO:0070100	negative regulation of chemokine-mediated signaling pathway	BP	3	1	0.00958702
GO:0060800	regulation of cell differentiation involved in embryonic placenta development	BP	3	1	0.00958702
GO:2001137	positive regulation of endocytic recycling	BP	3	1	0.00958702
GO:0020016	ciliary pocket	CC	3	1	0.00958702
GO:0020018	ciliary pocket membrane	CC	3	1	0.00958702
GO:0001515	opioid peptide activity	MF	3	1	0.00958702
GO:0003987	acetate-CoA ligase activity	MF	3	1	0.00958702
GO:0060560	developmental growth involved in morphogenesis	BP	141	3	0.0102541
GO:0003007	heart morphogenesis	BP	141	3	0.0102541
GO:0016324	apical plasma membrane	CC	141	3	0.0102541
GO:0051090	regulation of sequence-specific DNA binding transcription factor activity	BP	270	4	0.0105762
GO:0051899	membrane depolarization	BP	49	2	0.0107031
GO:2000113	negative regulation of cellular macromolecule biosynthetic process	BP	977	8	0.0109111
GO:0006939	smooth muscle contraction	BP	50	2	0.0111266
GO:0010717	regulation of epithelial to mesenchymal transition	BP	50	2	0.0111266
GO:0003231	cardiac ventricle development	BP	50	2	0.0111266
GO:0005518	collagen binding	MF	50	2	0.0111266
GO:0048568	embryonic organ development	BP	275	4	0.0112575
GO:0044463	cell projection part	CC	599	6	0.0112663
GO:0019199	transmembrane receptor protein kinase activity	MF	51	2	0.0115576
GO:0061180	mammary gland epithelium development	BP	52	2	0.0119958
GO:0044459	plasma membrane part	CC	1205	9	0.0121301
GO:0008285	negative regulation of cell proliferation	BP	436	5	0.012143
GO:0043534	blood vessel endothelial cell migration	BP	53	2	0.0124412
GO:0031100	organ regeneration	BP	53	2	0.0124412
GO:0046100	hypoxanthine metabolic process	BP	4	1	0.0127628
GO:0046101	hypoxanthine biosynthetic process	BP	4	1	0.0127628
GO:0061302	smooth muscle cell-matrix adhesion	BP	4	1	0.0127628
GO:0016199	axon midline choice point recognition	BP	4	1	0.0127628
GO:0071474	cellular hyperosmotic response	BP	4	1	0.0127628
GO:0010612	regulation of cardiac muscle adaptation	BP	4	1	0.0127628
GO:0033600	negative regulation of mammary gland epithelial cell proliferation	BP	4	1	0.0127628
GO:0038065	collagen-activated signaling pathway	BP	4	1	0.0127628
GO:0010886	positive regulation of cholesterol storage	BP	4	1	0.0127628
GO:0060763	mammary duct terminal end bud growth	BP	4	1	0.0127628
GO:1903025	regulation of RNA polymerase II regulatory region sequence-specific DNA binding	BP	4	1	0.0127628
GO:0048671	negative regulation of collateral sprouting	BP	4	1	0.0127628
GO:0046137	negative regulation of vitamin metabolic process	BP	4	1	0.0127628
GO:0060556	regulation of vitamin D biosynthetic process	BP	4	1	0.0127628
GO:0046415	urate metabolic process	BP	4	1	0.0127628
GO:0016080	synaptic vesicle targeting	BP	4	1	0.0127628
GO:0050923	regulation of negative chemotaxis	BP	4	1	0.0127628
GO:0042985	negative regulation of amyloid precursor protein biosynthetic process	BP	4	1	0.0127628
GO:0005922	connexon complex	CC	4	1	0.0127628
GO:0036056	filtration diaphragm	CC	4	1	0.0127628
GO:0036057	slit diaphragm	CC	4	1	0.0127628
GO:0002189	ribose phosphate diphosphokinase complex	CC	4	1	0.0127628
GO:0038064	collagen receptor activity	MF	4	1	0.0127628
GO:0016775	phosphotransferase activity, nitrogenous group as acceptor	MF	4	1	0.0127628
GO:0004749	ribose phosphate diphosphokinase activity	MF	4	1	0.0127628
GO:0031503	protein complex localization	BP	54	2	0.0128938
GO:0004872	receptor activity	MF	443	5	0.0129427
GO:0061448	connective tissue development	BP	154	3	0.0130086
GO:0045216	cell-cell junction organization	BP	154	3	0.0130086
GO:0032879	regulation of localization	BP	1444	10	0.0133241
GO:1901888	regulation of cell junction assembly	BP	55	2	0.0133535
GO:0043679	axon terminus	CC	55	2	0.0133535
GO:0000902	cell morphogenesis	BP	1023	8	0.0141734
GO:0003206	cardiac chamber morphogenesis	BP	57	2	0.0142942
GO:0071363	cellular response to growth factor stimulus	BP	631	6	0.0143038
GO:0051259	protein oligomerization	BP	296	4	0.0144282
GO:0098589	membrane region	CC	633	6	0.014511
GO:0040007	growth	BP	634	6	0.0146154
GO:0071495	cellular response to endogenous stimulus	BP	833	7	0.0153115
GO:0040013	negative regulation of locomotion	BP	164	3	0.0153896
GO:0034329	cell junction assembly	BP	165	3	0.0156403
GO:0007043	cell-cell junction assembly	BP	60	2	0.0157575
GO:0070848	response to growth factor	BP	645	6	0.0157993
GO:0086014	atrial cardiac muscle cell action potential	BP	5	1	0.0159286
GO:0086026	atrial cardiac muscle cell to AV node cell signaling	BP	5	1	0.0159286
GO:0086066	atrial cardiac muscle cell to AV node cell communication	BP	5	1	0.0159286
GO:0015867	ATP transport	BP	5	1	0.0159286
GO:0016198	axon choice point recognition	BP	5	1	0.0159286
GO:0032691	negative regulation of interleukin-1 beta production	BP	5	1	0.0159286
GO:0032534	regulation of microvillus assembly	BP	5	1	0.0159286
GO:0070099	regulation of chemokine-mediated signaling pathway	BP	5	1	0.0159286
GO:0098722	asymmetric stem cell division	BP	5	1	0.0159286
GO:0021825	substrate-dependent cerebral cortex tangential migration	BP	5	1	0.0159286
GO:0007512	adult heart development	BP	5	1	0.0159286
GO:0038036	sphingosine-1-phosphate receptor activity	MF	5	1	0.0159286
GO:0010721	negative regulation of cell development	BP	168	3	0.0164066
GO:0003014	renal system process	BP	62	2	0.0167674
GO:0006941	striated muscle contraction	BP	63	2	0.0172825
GO:0018107	peptidyl-threonine phosphorylation	BP	64	2	0.0178043
GO:0044306	neuron projection terminus	CC	64	2	0.0178043
GO:0034765	regulation of ion transmembrane transport	BP	174	3	0.0180019
GO:0031253	cell projection membrane	CC	175	3	0.0182759
GO:0009719	response to endogenous stimulus	BP	1072	8	0.018393
GO:0044700	single organism signaling	BP	3567	18	0.0184116
GO:0032989	cellular component morphogenesis	BP	1073	8	0.0184877
GO:0051260	protein homooligomerization	BP	176	3	0.0185523
GO:0023052	signaling	BP	3571	18	0.0186271
GO:0010977	negative regulation of neuron projection development	BP	66	2	0.0188679
GO:0030175	filopodium	CC	66	2	0.0188679
GO:0033632	regulation of cell-cell adhesion mediated by integrin	BP	6	1	0.0190845
GO:0061314	Notch signaling involved in heart development	BP	6	1	0.0190845
GO:0060307	regulation of ventricular cardiac muscle cell membrane repolarization	BP	6	1	0.0190845
GO:0015868	purine ribonucleotide transport	BP	6	1	0.0190845
GO:0032692	negative regulation of interleukin-1 production	BP	6	1	0.0190845
GO:0060539	diaphragm development	BP	6	1	0.0190845
GO:0014745	negative regulation of muscle adaptation	BP	6	1	0.0190845
GO:0072015	glomerular visceral epithelial cell development	BP	6	1	0.0190845
GO:0072310	glomerular epithelial cell development	BP	6	1	0.0190845
GO:0030002	cellular anion homeostasis	BP	6	1	0.0190845
GO:0030320	cellular monovalent inorganic anion homeostasis	BP	6	1	0.0190845
GO:0016264	gap junction assembly	BP	6	1	0.0190845
GO:0006600	creatine metabolic process	BP	6	1	0.0190845
GO:0043589	skin morphogenesis	BP	6	1	0.0190845
GO:0042368	vitamin D biosynthetic process	BP	6	1	0.0190845
GO:0021800	cerebral cortex tangential migration	BP	6	1	0.0190845
GO:0060044	negative regulation of cardiac muscle cell proliferation	BP	6	1	0.0190845
GO:0061469	regulation of type B pancreatic cell proliferation	BP	6	1	0.0190845
GO:0030656	regulation of vitamin metabolic process	BP	6	1	0.0190845
GO:2001135	regulation of endocytic recycling	BP	6	1	0.0190845
GO:0008046	axon guidance receptor activity	MF	6	1	0.0190845
GO:0005243	gap junction channel activity	MF	6	1	0.0190845
GO:0005251	delayed rectifier potassium channel activity	MF	6	1	0.0190845
GO:0001727	lipid kinase activity	MF	6	1	0.0190845
GO:0016778	diphosphotransferase activity	MF	6	1	0.0190845
GO:0016405	CoA-ligase activity	MF	6	1	0.0190845
GO:0045664	regulation of neuron differentiation	BP	323	4	0.0192733
GO:0018210	peptidyl-threonine modification	BP	67	2	0.0194095
GO:0001501	skeletal system development	BP	327	4	0.0200675
GO:0034330	cell junction organization	BP	183	3	0.0205525
GO:0001822	kidney development	BP	184	3	0.0208476
GO:0001936	regulation of endothelial cell proliferation	BP	70	2	0.0210735
GO:0016049	cell growth	BP	333	4	0.0212966
GO:0034762	regulation of transmembrane transport	BP	186	3	0.0214449
GO:0003205	cardiac chamber development	BP	71	2	0.021641
GO:1903350	response to dopamine	BP	7	1	0.0222306
GO:1903351	cellular response to dopamine	BP	7	1	0.0222306
GO:0006167	AMP biosynthetic process	BP	7	1	0.0222306
GO:0001977	renal system process involved in regulation of blood volume	BP	7	1	0.0222306
GO:0003093	regulation of glomerular filtration	BP	7	1	0.0222306
GO:0032966	negative regulation of collagen biosynthetic process	BP	7	1	0.0222306
GO:0086019	cell-cell signaling involved in cardiac conduction	BP	7	1	0.0222306
GO:0051503	adenine nucleotide transport	BP	7	1	0.0222306
GO:0061318	renal filtration cell differentiation	BP	7	1	0.0222306
GO:0072112	glomerular visceral epithelial cell differentiation	BP	7	1	0.0222306
GO:0072311	glomerular epithelial cell differentiation	BP	7	1	0.0222306
GO:0031953	negative regulation of protein autophosphorylation	BP	7	1	0.0222306
GO:0010944	negative regulation of transcription by competitive promoter binding	BP	7	1	0.0222306
GO:1901741	positive regulation of myoblast fusion	BP	7	1	0.0222306
GO:0003376	sphingosine-1-phosphate signaling pathway	BP	7	1	0.0222306
GO:0036445	neuronal stem cell division	BP	7	1	0.0222306
GO:0055057	neuroblast division	BP	7	1	0.0222306
GO:0021891	olfactory bulb interneuron development	BP	7	1	0.0222306
GO:0022028	tangential migration from the subventricular zone to the olfactory bulb	BP	7	1	0.0222306
GO:0055022	negative regulation of cardiac muscle tissue growth	BP	7	1	0.0222306
GO:0061117	negative regulation of heart growth	BP	7	1	0.0222306
GO:0051450	myoblast proliferation	BP	7	1	0.0222306
GO:0045125	bioactive lipid receptor activity	MF	7	1	0.0222306
GO:0031005	filamin binding	MF	7	1	0.0222306
GO:0030154	cell differentiation	BP	2301	13	0.022717
GO:0072001	renal system development	BP	191	3	0.0229793
GO:0045177	apical part of cell	CC	191	3	0.0229793
GO:0000904	cell morphogenesis involved in differentiation	BP	704	6	0.0233153
GO:0001837	epithelial to mesenchymal transition	BP	75	2	0.0239741
GO:0051246	regulation of protein metabolic process	BP	1825	11	0.0244872
GO:0010713	negative regulation of collagen metabolic process	BP	8	1	0.0253669
GO:0015865	purine nucleotide transport	BP	8	1	0.0253669
GO:0010614	negative regulation of cardiac muscle hypertrophy	BP	8	1	0.0253669
GO:0042533	tumor necrosis factor biosynthetic process	BP	8	1	0.0253669
GO:0042534	regulation of tumor necrosis factor biosynthetic process	BP	8	1	0.0253669
GO:0072010	glomerular epithelium development	BP	8	1	0.0253669
GO:0032530	regulation of microvillus organization	BP	8	1	0.0253669
GO:1901739	regulation of myoblast fusion	BP	8	1	0.0253669
GO:0042359	vitamin D metabolic process	BP	8	1	0.0253669
GO:0042362	fat-soluble vitamin biosynthetic process	BP	8	1	0.0253669
GO:0090520	sphingolipid mediated signaling pathway	BP	8	1	0.0253669
GO:0042983	amyloid precursor protein biosynthetic process	BP	8	1	0.0253669
GO:0042984	regulation of amyloid precursor protein biosynthetic process	BP	8	1	0.0253669
GO:0033630	positive regulation of cell adhesion mediated by integrin	BP	8	1	0.0253669
GO:0007175	negative regulation of epidermal growth factor-activated receptor activity	BP	8	1	0.0253669
GO:0016342	catenin complex	CC	8	1	0.0253669
GO:0001959	regulation of cytokine-mediated signaling pathway	BP	78	2	0.0257888
GO:0031345	negative regulation of cell projection organization	BP	78	2	0.0257888
GO:0044763	single-organism cellular process	BP	7806	31	0.0261437
GO:0001704	formation of primary germ layer	BP	79	2	0.0264059
GO:0021987	cerebral cortex development	BP	79	2	0.0264059
GO:0051384	response to glucocorticoid	BP	80	2	0.0270289
GO:0008201	heparin binding	MF	80	2	0.0270289
GO:0010594	regulation of endothelial cell migration	BP	81	2	0.027658
GO:0032963	collagen metabolic process	BP	81	2	0.027658
GO:0031175	neuron projection development	BP	735	6	0.0281086
GO:0048589	developmental growth	BP	364	4	0.0283849
GO:0010885	regulation of cholesterol storage	BP	9	1	0.0284933
GO:0033631	cell-cell adhesion mediated by integrin	BP	9	1	0.0284933
GO:0003071	renal system process involved in regulation of systemic arterial blood pressure	BP	9	1	0.0284933
GO:0044062	regulation of excretion	BP	9	1	0.0284933
GO:0002544	chronic inflammatory response	BP	9	1	0.0284933
GO:0044252	negative regulation of multicellular organismal metabolic process	BP	9	1	0.0284933
GO:0086003	cardiac muscle cell contraction	BP	9	1	0.0284933
GO:0003299	muscle hypertrophy in response to stress	BP	9	1	0.0284933
GO:0014741	negative regulation of muscle hypertrophy	BP	9	1	0.0284933
GO:0014898	cardiac muscle hypertrophy in response to stress	BP	9	1	0.0284933
GO:0060749	mammary gland alveolus development	BP	9	1	0.0284933
GO:0061377	mammary gland lobule development	BP	9	1	0.0284933
GO:0055064	chloride ion homeostasis	BP	9	1	0.0284933
GO:0002070	epithelial cell maturation	BP	9	1	0.0284933
GO:2000678	negative regulation of transcription regulatory region DNA binding	BP	9	1	0.0284933
GO:0001964	startle response	BP	9	1	0.0284933
GO:0021889	olfactory bulb interneuron differentiation	BP	9	1	0.0284933
GO:0034312	diol biosynthetic process	BP	9	1	0.0284933
GO:0046512	sphingosine biosynthetic process	BP	9	1	0.0284933
GO:0050774	negative regulation of dendrite morphogenesis	BP	9	1	0.0284933
GO:0010561	negative regulation of glycoprotein biosynthetic process	BP	9	1	0.0284933
GO:0090280	positive regulation of calcium ion import	BP	9	1	0.0284933
GO:0005916	fascia adherens	CC	9	1	0.0284933
GO:0030673	axolemma	CC	9	1	0.0284933
GO:0031095	platelet dense tubular network membrane	CC	9	1	0.0284933
GO:0016208	AMP binding	MF	9	1	0.0284933
GO:0034713	type I transforming growth factor beta receptor binding	MF	9	1	0.0284933
GO:0051046	regulation of secretion	BP	365	4	0.0286345
GO:0035265	organ growth	BP	83	2	0.0289337
GO:0001935	endothelial cell proliferation	BP	83	2	0.0289337
GO:2000736	regulation of stem cell differentiation	BP	83	2	0.0289337
GO:0007154	cell communication	BP	3731	18	0.0290639
GO:0044259	multicellular organismal macromolecule metabolic process	BP	84	2	0.0295803
GO:0060759	regulation of response to cytokine stimulus	BP	84	2	0.0295803
GO:0030182	neuron differentiation	BP	953	7	0.029727
GO:0031960	response to corticosteroid	BP	85	2	0.0302328
GO:0017124	SH3 domain binding	MF	85	2	0.0302328
GO:0010033	response to organic substance	BP	1886	11	0.0305347
GO:0001655	urogenital system development	BP	215	3	0.0311626
GO:0050801	ion homeostasis	BP	376	4	0.0314674
GO:0061351	neural precursor cell proliferation	BP	87	2	0.0315548
GO:0010878	cholesterol storage	BP	10	1	0.03161
GO:0045603	positive regulation of endothelial cell differentiation	BP	10	1	0.03161
GO:0009113	purine nucleobase biosynthetic process	BP	10	1	0.03161
GO:0006972	hyperosmotic response	BP	10	1	0.03161
GO:0014887	cardiac muscle adaptation	BP	10	1	0.03161
GO:0060707	trophoblast giant cell differentiation	BP	10	1	0.03161
GO:0035988	chondrocyte proliferation	BP	10	1	0.03161
GO:0003417	growth plate cartilage development	BP	10	1	0.03161
GO:0060143	positive regulation of syncytium formation by plasma membrane fusion	BP	10	1	0.03161
GO:0060394	negative regulation of pathway-restricted SMAD protein phosphorylation	BP	10	1	0.03161
GO:0036120	cellular response to platelet-derived growth factor stimulus	BP	10	1	0.03161
GO:0006670	sphingosine metabolic process	BP	10	1	0.03161
GO:0046520	sphingoid biosynthetic process	BP	10	1	0.03161
GO:0055026	negative regulation of cardiac muscle tissue development	BP	10	1	0.03161
GO:0031094	platelet dense tubular network	CC	10	1	0.03161
GO:0005072	transforming growth factor beta receptor, cytoplasmic mediator activity	MF	10	1	0.03161
GO:0001764	neuron migration	BP	88	2	0.0322244
GO:0050794	regulation of cellular process	BP	6524	27	0.0323131
GO:0007610	behavior	BP	380	4	0.0325376
GO:0071383	cellular response to steroid hormone stimulus	BP	89	2	0.0328996
GO:0031324	negative regulation of cellular metabolic process	BP	1664	10	0.0330644
GO:0030054	cell junction	CC	766	6	0.033525
GO:0030326	embryonic limb morphogenesis	BP	90	2	0.0335803
GO:0035113	embryonic appendage morphogenesis	BP	90	2	0.0335803
GO:0019897	extrinsic component of plasma membrane	CC	90	2	0.0335803
GO:0032970	regulation of actin filament-based process	BP	222	3	0.0338036
GO:0044236	multicellular organismal metabolic process	BP	91	2	0.0342666
GO:0072073	kidney epithelium development	BP	91	2	0.0342666
GO:0030879	mammary gland development	BP	91	2	0.0342666
GO:0003094	glomerular filtration	BP	11	1	0.034717
GO:0061311	cell surface receptor signaling pathway involved in heart development	BP	11	1	0.034717
GO:1902931	negative regulation of alcohol biosynthetic process	BP	11	1	0.034717
GO:0048670	regulation of collateral sprouting	BP	11	1	0.034717
GO:0010715	regulation of extracellular matrix disassembly	BP	11	1	0.034717
GO:0010801	negative regulation of peptidyl-threonine phosphorylation	BP	11	1	0.034717
GO:1903019	negative regulation of glycoprotein metabolic process	BP	11	1	0.034717
GO:0030903	notochord development	BP	11	1	0.034717
GO:0036119	response to platelet-derived growth factor	BP	11	1	0.034717
GO:0034311	diol metabolic process	BP	11	1	0.034717
GO:0031528	microvillus membrane	CC	11	1	0.034717
GO:0005921	gap junction	CC	11	1	0.034717
GO:0004181	metallocarboxypeptidase activity	MF	11	1	0.034717
GO:0070411	I-SMAD binding	MF	11	1	0.034717
GO:0022829	wide pore channel activity	MF	11	1	0.034717
GO:2000021	regulation of ion homeostasis	BP	92	2	0.0349584
GO:0098742	cell-cell adhesion via plasma-membrane adhesion molecules	BP	92	2	0.0349584
GO:0004713	protein tyrosine kinase activity	MF	92	2	0.0349584
GO:0048598	embryonic morphogenesis	BP	390	4	0.035307
GO:0022612	gland morphogenesis	BP	94	2	0.0363583
GO:0050767	regulation of neurogenesis	BP	394	4	0.0364524
GO:0010605	negative regulation of macromolecule metabolic process	BP	1691	10	0.0364717
GO:0048878	chemical homeostasis	BP	582	5	0.0369189
GO:0072089	stem cell proliferation	BP	95	2	0.0370664
GO:0019903	protein phosphatase binding	MF	96	2	0.0377798
GO:0010884	positive regulation of lipid storage	BP	12	1	0.0378142
GO:0097205	renal filtration	BP	12	1	0.0378142
GO:0045907	positive regulation of vasoconstriction	BP	12	1	0.0378142
GO:0060004	reflex	BP	12	1	0.0378142
GO:0042346	positive regulation of NF-kappaB import into nucleus	BP	12	1	0.0378142
GO:0043518	negative regulation of DNA damage response, signal transduction by p53 class mediator	BP	12	1	0.0378142
GO:0060142	regulation of syncytium formation by plasma membrane fusion	BP	12	1	0.0378142
GO:0048185	activin binding	MF	12	1	0.0378142
GO:0016878	acid-thiol ligase activity	MF	12	1	0.0378142
GO:0008092	cytoskeletal protein binding	MF	586	5	0.0378581
GO:0007269	neurotransmitter secretion	BP	97	2	0.0384985
GO:0051147	regulation of muscle cell differentiation	BP	97	2	0.0384985
GO:0044708	single-organism behavior	BP	234	3	0.038596
GO:0050795	regulation of behavior	BP	98	2	0.0392225
GO:0071310	cellular response to organic substance	BP	1473	9	0.0396542
GO:0016301	kinase activity	MF	594	5	0.0397811
GO:0071242	cellular response to ammonium ion	BP	13	1	0.0409018
GO:0045987	positive regulation of smooth muscle contraction	BP	13	1	0.0409018
GO:0086002	cardiac muscle cell action potential involved in contraction	BP	13	1	0.0409018
GO:0045662	negative regulation of myoblast differentiation	BP	13	1	0.0409018
GO:0086064	cell communication by electrical coupling involved in cardiac conduction	BP	13	1	0.0409018
GO:0044342	type B pancreatic cell proliferation	BP	13	1	0.0409018
GO:0033599	regulation of mammary gland epithelial cell proliferation	BP	13	1	0.0409018
GO:0046697	decidualization	BP	13	1	0.0409018
GO:0034383	low-density lipoprotein particle clearance	BP	13	1	0.0409018
GO:0003416	endochondral bone growth	BP	13	1	0.0409018
GO:0008356	asymmetric cell division	BP	13	1	0.0409018
GO:0046519	sphingoid metabolic process	BP	13	1	0.0409018
GO:2000272	negative regulation of receptor activity	BP	13	1	0.0409018
GO:0010719	negative regulation of epithelial to mesenchymal transition	BP	13	1	0.0409018
GO:0017134	fibroblast growth factor binding	MF	13	1	0.0409018
GO:0050770	regulation of axonogenesis	BP	101	2	0.0414256
GO:0005539	glycosaminoglycan binding	MF	101	2	0.0414256
GO:0048666	neuron development	BP	807	6	0.0416914
GO:0071407	cellular response to organic cyclic compound	BP	242	3	0.0419751
GO:0014031	mesenchymal cell development	BP	102	2	0.0421702
GO:0001890	placenta development	BP	102	2	0.0421702
GO:0045665	negative regulation of neuron differentiation	BP	102	2	0.0421702
GO:0021543	pallium development	BP	102	2	0.0421702
GO:0048699	generation of neurons	BP	1028	7	0.042421
GO:0040008	regulation of growth	BP	415	4	0.0428212
GO:0030030	cell projection organization	BP	1031	7	0.0429934
GO:0016310	phosphorylation	BP	1495	9	0.0430416
GO:0048864	stem cell development	BP	104	2	0.0436747
GO:0035107	appendage morphogenesis	BP	104	2	0.0436747
GO:0035108	limb morphogenesis	BP	104	2	0.0436747
GO:0007165	signal transduction	BP	3326	16	0.0437776
GO:0034616	response to laminar fluid shear stress	BP	14	1	0.0439797
GO:0048668	collateral sprouting	BP	14	1	0.0439797
GO:0003179	heart valve morphogenesis	BP	14	1	0.0439797
GO:2000279	negative regulation of DNA biosynthetic process	BP	14	1	0.0439797
GO:0045909	positive regulation of vasodilation	BP	14	1	0.0439797
GO:0015858	nucleoside transport	BP	14	1	0.0439797
GO:0060306	regulation of membrane repolarization	BP	14	1	0.0439797
GO:0010831	positive regulation of myotube differentiation	BP	14	1	0.0439797
GO:0070098	chemokine-mediated signaling pathway	BP	14	1	0.0439797
GO:2000300	regulation of synaptic vesicle exocytosis	BP	14	1	0.0439797
GO:0048103	somatic stem cell division	BP	14	1	0.0439797
GO:0070628	proteasome binding	MF	14	1	0.0439797
GO:0004190	aspartic-type endopeptidase activity	MF	14	1	0.0439797
GO:0070001	aspartic-type peptidase activity	MF	14	1	0.0439797
GO:0007155	cell adhesion	BP	821	6	0.0447499
GO:0048869	cellular developmental process	BP	2520	13	0.0448898
GO:0001071	nucleic acid binding transcription factor activity	MF	822	6	0.0449737
GO:0003700	transcription factor activity, sequence-specific DNA binding	MF	822	6	0.0449737
GO:0046165	alcohol biosynthetic process	BP	106	2	0.0451991
GO:0022610	biological adhesion	BP	824	6	0.0454235
GO:0098797	plasma membrane protein complex	CC	251	3	0.0459509
GO:0051240	positive regulation of multicellular organismal process	BP	828	6	0.0463317
GO:0032925	regulation of activin receptor signaling pathway	BP	15	1	0.047048
GO:0046033	AMP metabolic process	BP	15	1	0.047048
GO:0010894	negative regulation of steroid biosynthetic process	BP	15	1	0.047048
GO:0045939	negative regulation of steroid metabolic process	BP	15	1	0.047048
GO:0045616	regulation of keratinocyte differentiation	BP	15	1	0.047048
GO:0010644	cell communication by electrical coupling	BP	15	1	0.047048
GO:0031069	hair follicle morphogenesis	BP	15	1	0.047048
GO:0030033	microvillus assembly	BP	15	1	0.047048
GO:0055083	monovalent inorganic anion homeostasis	BP	15	1	0.047048
GO:0006775	fat-soluble vitamin metabolic process	BP	15	1	0.047048
GO:0090279	regulation of calcium ion import	BP	15	1	0.047048
GO:0042474	middle ear morphogenesis	BP	15	1	0.047048
GO:0046621	negative regulation of organ growth	BP	15	1	0.047048
GO:0030275	LRR domain binding	MF	15	1	0.047048
GO:0048738	cardiac muscle tissue development	BP	109	2	0.0475224
GO:0007565	female pregnancy	BP	109	2	0.0475224
GO:0023061	signal release	BP	256	3	0.0482386
GO:0006836	neurotransmitter transport	BP	110	2	0.0483066
GO:0048762	mesenchymal cell differentiation	BP	110	2	0.0483066
GO:0030308	negative regulation of cell growth	BP	110	2	0.0483066
GO:0046903	secretion	BP	627	5	0.0483482
GO:0051924	regulation of calcium ion transport	BP	112	2	0.0498891
GO:0035148	tube formation	BP	112	2	0.0498891
GO:0005516	calmodulin binding	MF	112	2	0.0498891

## Sheet: Age_MALDR_KEGG
KeggId	Pathway	N	DE	P.DE	Genes
path:hsa04350	TGF-beta signaling pathway	67	3	2.60624e-05	ID1, ID3, SMAD7
path:hsa04550	Signaling pathways regulating pluripotency of stem cells	96	2	0.003185	ID1, ID3
path:hsa04390	Hippo signaling pathway	112	2	0.0043063	ID1, SMAD7
path:hsa04015	Rap1 signaling pathway	137	2	0.00637201	FGF13, ID1
path:hsa01100	Metabolic pathways	908	4	0.00697735
path:hsa00030	Pentose phosphate pathway	23	1	0.020196	PRPS1
path:hsa00640	Propanoate metabolism	28	1	0.0245358	ACSS1
path:hsa00330	Arginine and proline metabolism	33	1	0.0288576	CKB
path:hsa00600	Sphingolipid metabolism	36	1	0.0314421	SPHK1
path:hsa04370	VEGF signaling pathway	44	1	0.0383028	SPHK1
path:hsa05412	Arrhythmogenic right ventricular cardiomyopathy (ARVC)	47	1	0.0408638	GJA1
path:hsa05218	Melanoma	47	1	0.0408638	FGF13

## Sheet: Gender_EQLF_DE_genes
gene_id	gene_name	descr	seqid	logFC	logCPM	FDR	entrez
ENSG00000198692	EIF1AY	eukaryotic translation initiation factor 1A, Y-linked	Y	10.5825	2.52141	8.49395e-37	9086
ENSG00000233864	TTTY15	testis-specific transcript, Y-linked 15 (non-protein coding)	Y	10.148	2.05919	4.44915e-36	64595
ENSG00000067646	ZFY	zinc finger protein, Y-linked	Y	10.1117	3.52009	4.44915e-36	7544
ENSG00000183878	UTY	ubiquitously transcribed tetratricopeptide repeat containing, Y-linked	Y	10.0952	2.50645	4.53448e-35	7404
ENSG00000099725	PRKY	protein kinase, Y-linked, pseudogene	Y	5.11596	2.33551	2.99364e-34	5616
ENSG00000114374	USP9Y	ubiquitin specific peptidase 9, Y-linked	Y	10.6416	4.37183	4.81968e-34	8287
ENSG00000012817	KDM5D	lysine (K)-specific demethylase 5D	Y	10.0977	4.07971	4.83309e-33	8284
ENSG00000131002	TXLNGY	taxilin gamma pseudogene, Y-linked	Y	9.70032	2.49845	1.42656e-31	246126
ENSG00000176728	TTTY14	testis-specific transcript, Y-linked 14 (non-protein coding)	Y	8.254	-0.711389	7.20827e-31	NA
ENSG00000067048	DDX3Y	DEAD (Asp-Glu-Ala-Asp) box helicase 3, Y-linked	Y	9.92423	4.90498	7.23423e-29	8653
ENSG00000233070	ZFY-AS1	ZFY antisense RNA 1	Y	8.2599	-1.17631	1.80381e-27	NA
ENSG00000165246	NLGN4Y	neuroligin 4, Y-linked	Y	8.25151	4.54112	1.34429e-26	22829
ENSG00000129824	RPS4Y1	ribosomal protein S4, Y-linked 1	Y	10.1412	6.24949	1.78408e-26	6192
ENSG00000184895	SRY	sex determining region Y	Y	8.16764	-1.23624	1.09005e-25	6736
ENSG00000278039	Xist_exon1	X-chromosome inactivation gene exon 1	X	-7.43938	-1.69534	7.18459e-25	NA
ENSG00000260197	RP11-424G14.1		Y	6.06726	-3.32402	9.96905e-23	NA
ENSG00000270641	TSIX	TSIX transcript, XIST antisense RNA	X	-9.96578	5.26876	1.07497e-21	9383
ENSG00000229807	XIST	X inactive specific transcript (non-protein coding)	X	-10.2578	5.97083	3.74913e-20	7503
ENSG00000228787	NLGN4Y-AS1	NLGN4Y antisense RNA 1	Y	5.21031	-3.91068	5.23948e-17	100874056
ENSG00000232928	DDX3P1	DEAD (Asp-Glu-Ala-Asp) box polypeptide 3, pseudogene 1	X	4.15617	-3.16353	1.03634e-13	NA
ENSG00000169953	HSFY2	heat shock transcription factor, Y-linked 2	Y	4.96692	-4.00029	2.11216e-13	86614
ENSG00000226863	SHROOM2P1	shroom family member 2 pseudogene 1	Y	4.69309	-4.1725	3.5286e-13	NA
ENSG00000154620	TMSB4Y	thymosin beta 4, Y-linked	Y	7.03041	-2.87545	7.08801e-08	9087
ENSG00000237659	RNASEH2CP1	ribonuclease H2, subunit C pseudogene 1	Y	8.8195	-1.27515	4.71511e-07	NA
ENSG00000242875	RBMY1B	RNA binding motif protein, Y-linked, family 1, member B	Y	4.71274	-4.13309	1.36854e-06	378948
ENSG00000144820	ADGRG7	adhesion G protein-coupled receptor G7	3	-9.90821	0.429649	1.17575e-05	84873
ENSG00000169811	RBMY1HP	RNA binding motif protein, Y-linked, family 1, member H, pseudogene	Y	4.21557	-4.38756	1.79433e-05	NA
ENSG00000226941	RBMY1J	RNA binding motif protein, Y-linked, family 1, member J	Y	4.27958	-4.19775	3.56595e-05	378951
ENSG00000169800	RBMY1F	RNA binding motif protein, Y-linked, family 1, member F	Y	4.22838	-4.21847	5.50634e-05	159163
ENSG00000255823	MTRNR2L8	MT-RNR2-like 8	11	-4.97352	1.65374	9.16364e-05	100463486
ENSG00000082684	SEMA5B	sema domain, seven thrombospondin repeats (type 1 and type 1-like), transmembrane domain (TM) and short cytoplasmic domain, (semaphorin) 5B	3	-7.26845	0.269001	0.000306713	54437
ENSG00000130433	CACNG6	calcium channel, voltage-dependent, gamma subunit 6	19	-6.42788	-2.79281	0.000320529	59285
ENSG00000260947	RP11-384P7.7		9	3.52922	-1.99382	0.000334741	NA
ENSG00000216368	RP3-486D24.1		6	5.54563	-3.71086	0.000385464	NA
ENSG00000206159	GYG2P1	glycogenin 2 pseudogene 1	Y	3.63135	-4.0275	0.00041532	NA
ENSG00000112214	FHL5	four and a half LIM domains 5	6	-5.88798	-3.20959	0.00045601	9457
ENSG00000126012	KDM5C	lysine (K)-specific demethylase 5C	X	-0.750676	6.282	0.000558326	8242
ENSG00000240540	RPL3P9	ribosomal protein L3 pseudogene 9	8	-5.34173	-3.13958	0.000772479	NA
ENSG00000165966	PDZRN4	PDZ domain containing ring finger 4	12	-5.51156	-1.52491	0.000772479	29951
ENSG00000215005	HSPD1P7	heat shock 60kDa protein 1 (chaperonin) pseudogene 7	21	6.43956	-1.85273	0.000780058	NA
ENSG00000102854	MSLN	mesothelin	16	-4.80425	-1.01759	0.000780058	10232
ENSG00000228314	CYP4F29P	cytochrome P450, family 4, subfamily F, polypeptide 29, pseudogene	21	-4.43944	-4.34022	0.000796591	54055
ENSG00000197406	DIO3	deiodinase, iodothyronine, type III	14	-5.73913	-0.816283	0.000843249	1735
ENSG00000168505	GBX2	gastrulation brain homeobox 2	2	-5.20061	-2.62323	0.000889827	2637
ENSG00000231535	LINC00278	long intergenic non-protein coding RNA 278	Y	7.72979	-2.19207	0.00091407	100873962
ENSG00000275431	CTB-186H2.3		17	4.4992	-4.27711	0.00117457	NA
ENSG00000146453	PNLDC1	poly(A)-specific ribonuclease (PARN)-like domain containing 1	6	-4.36482	-2.1204	0.0013838	154197
ENSG00000252774	SNORA48	Small nucleolar RNA SNORA48	15	-3.09533	-4.69324	0.0013838	NA
ENSG00000234335	RPS4XP11	ribosomal protein S4X pseudogene 11	10	-0.71951	5.14022	0.00205105	NA
ENSG00000250056	LINC01018	long intergenic non-protein coding RNA 1018	5	-3.27287	-3.75986	0.00242282	255167
ENSG00000281128	PTENP1-AS	PTENP1 antisense RNA	9	3.2671	-3.93187	0.0024761	101243555
ENSG00000168333	C8orf22	chromosome 8 open reading frame 22	8	3.23427	-4.74556	0.0025007	492307
ENSG00000070031	SCT	secretin	11	-4.3217	-3.09637	0.0025386	6343
ENSG00000248923	MTND5P11	MT-ND5 pseudogene 11	5	-3.71637	-2.63938	0.0025386	NA
ENSG00000281721	LINC01080	long intergenic non-protein coding RNA 1080	13	-4.55334	-4.31516	0.00316068	NA
ENSG00000168594	ADAM29	ADAM metallopeptidase domain 29	4	-3.93596	-4.53384	0.00316068	11086
ENSG00000259974	LINC00261	long intergenic non-protein coding RNA 261	20	4.42437	-4.34507	0.00326534	140828
ENSG00000109063	MYH3	myosin, heavy chain 3, skeletal muscle, embryonic	17	-6.38469	7.61553	0.00326534	4621
ENSG00000147255	IGSF1	immunoglobulin superfamily, member 1	X	-5.04473	-1.22769	0.00369207	3547
ENSG00000197272	IL27	interleukin 27	16	2.90524	-4.83608	0.00385396	246778
ENSG00000231165	TRBV26OR9-2	T cell receptor beta variable 26/OR9-2 (pseudogene)	9	3.33002	-4.33641	0.00389166	NA
ENSG00000005889	ZFX	zinc finger protein, X-linked	X	-0.69067	5.2225	0.0039775	7543
ENSG00000185860	C1orf110	coiled-coil domain containing 190	1	-4.12244	-2.70921	0.00432189	339512
ENSG00000215644	GCGR	glucagon receptor	17	-3.61577	-4.55661	0.00580118	2642
ENSG00000264717	CH17-360D5.1		10	-4.59041	-1.57789	0.00747626	NA
ENSG00000149575	SCN2B	sodium channel, voltage gated, type II beta subunit	11	-2.63017	-4.74195	0.00783487	6327
ENSG00000156127	BATF	basic leucine zipper transcription factor, ATF-like	14	3.36097	-4.6579	0.00783487	10538
ENSG00000277758	SYT15		10	-2.26531	1.60414	0.00864996	83849
ENSG00000264006	AKR1C8P	aldo-keto reductase family 1, member C8, pseudogene	10	4.60011	-3.66205	0.00888937	340811
ENSG00000229236	TTTY10	testis-specific transcript, Y-linked 10 (non-protein coding)	Y	4.8475	-4.28817	0.00888937	246119
ENSG00000007933	FMO3	flavin containing monooxygenase 3	1	-3.69334	-0.377935	0.00888937	2328
ENSG00000183117	CSMD1	CUB and Sushi multiple domains 1	8	-4.31014	-1.43004	0.00923178	64478
ENSG00000204176	SYT15	synaptotagmin XV	10	-2.06766	1.70918	0.00927286	83849
ENSG00000204174	NPY4R	neuropeptide Y receptor Y4	10	-4.48355	-1.48402	0.00933624	5540
ENSG00000258933	RP11-991C1.1		14	-3.19861	-4.57958	0.00935944	NA
ENSG00000198034	RPS4X	ribosomal protein S4, X-linked	X	-0.670941	8.85162	0.010092	6191
ENSG00000214541	RPS4XP3	ribosomal protein S4X pseudogene 3	20	-0.7444	3.65096	0.0108696	NA
ENSG00000111536	IL26	interleukin 26	12	-2.83732	-4.85772	0.0108696	55801
ENSG00000183072	NKX2-5	NK2 homeobox 5	5	-3.66865	-3.93564	0.0110604	1482
ENSG00000269028	MTRNR2L12	MT-RNR2-like 12	3	-1.49664	-1.09002	0.011105	100462981
ENSG00000109272	PF4V1	platelet factor 4 variant 1	4	3.60099	-1.27874	0.011105	5197
ENSG00000185974	GRK1	G protein-coupled receptor kinase 1	13	3.97187	-3.29893	0.0116135	NA
ENSG00000145242	EPHA5	EPH receptor A5	4	-4.57638	0.563821	0.0118262	2044
ENSG00000125999	BPIFB1	BPI fold containing family B, member 1	20	3.36107	-3.56356	0.0118262	92747
ENSG00000160191	PDE9A	phosphodiesterase 9A	21	-3.55509	-4.43809	0.0118262	5152
ENSG00000257599	OVCH1-AS1	OVCH1 antisense RNA 1	12	2.97787	-2.53451	0.0133598	101055625
ENSG00000240371	RPS4XP13	ribosomal protein S4X pseudogene 13	11	-0.774697	3.316	0.0133958	NA
ENSG00000179772	FOXS1	forkhead box S1	20	-4.252	-2.04126	0.0134078	2307
ENSG00000077092	RARB	retinoic acid receptor, beta	3	-2.04132	-0.521191	0.0134078	5915
ENSG00000253373	RP11-21C17.1		8	-3.04224	-4.80459	0.0139242	NA
ENSG00000133020	MYH8	myosin, heavy chain 8, skeletal muscle, perinatal	17	-2.79663	-4.77312	0.0141517	4626
ENSG00000280916	FOXCUT	FOXC1 upstream transcript (non-protein coding)	6	-2.50054	-4.77706	0.0143588	NA
ENSG00000043591	ADRB1	adrenoceptor beta 1	10	-3.77039	-3.86145	0.0162771	153
ENSG00000225007	AC000067.1		22	-3.47603	-4.4906	0.0166922	NA
ENSG00000244073	RPS4XP6	ribosomal protein S4X pseudogene 6	5	-0.7099	3.75243	0.0176698	NA
ENSG00000083067	TRPM3	transient receptor potential cation channel, subfamily M, member 3	9	-2.33036	-1.08647	0.0204626	80036
ENSG00000052802	MSMO1	methylsterol monooxygenase 1	4	0.894802	6.50173	0.0205225	6307
ENSG00000022556	NLRP2	NLR family, pyrin domain containing 2	19	-3.75092	-2.81071	0.0212015	55655
ENSG00000151468	CCDC3	coiled-coil domain containing 3	10	-2.50105	0.0340369	0.021516	83643
ENSG00000261600	RP11-575H3.1		2	-1.36559	-2.22042	0.0218597	NA
ENSG00000249119	MTND6P4	MT-ND6 pseudogene 4	5	3.00075	-0.662112	0.0220286	NA
ENSG00000231933	CTA-125H2.2		22	-3.95533	-2.89819	0.0242051	NA
ENSG00000237919	RP11-181B18.1		1	-2.76277	-4.88691	0.0246058	NA
ENSG00000173674	EIF1AX	eukaryotic translation initiation factor 1A, X-linked	X	-0.625301	6.29312	0.0267731	1964
ENSG00000235538	RP1-230L10.1		6	2.77861	-4.89454	0.0268948	NA
ENSG00000105696	TMEM59L	transmembrane protein 59-like	19	-2.03068	0.453088	0.0270948	25789
ENSG00000236698	EIF1AXP1	eukaryotic translation initiation factor 1A, X-linked pseudogene 1	1	-0.608096	5.23735	0.027628	NA
ENSG00000253658	LINC01592	long intergenic non-protein coding RNA 1592	8	-3.37586	-3.18889	0.0283765	100505718
ENSG00000046647	GEMIN8	gem (nuclear organelle) associated protein 8	X	-0.717832	3.45007	0.0283765	54960
ENSG00000250846	EPHA5-AS1	EPHA5 antisense RNA 1	4	-3.56755	-3.11932	0.029227	100144602
ENSG00000130021	HDHD1	pseudouridine 5'-phosphatase	X	-0.66876	3.98154	0.0299592	8226
ENSG00000164434	FABP7	fatty acid binding protein 7, brain	6	2.47102	-4.856	0.0314423	2173
ENSG00000139155	SLCO1C1	solute carrier organic anion transporter family, member 1C1	12	-3.55114	-3.80891	0.0316166	53919
ENSG00000170477	KRT4	keratin 4, type II	12	-3.63731	-3.25185	0.0324356	3851
ENSG00000169895	SYAP1	synapse associated protein 1	X	-0.591032	5.90958	0.0328166	94056
ENSG00000213130	EEF1DP5	eukaryotic translation elongation factor 1 delta pseudogene 5	6	-3.37471	-4.45409	0.0330381	NA
ENSG00000188730	VWC2	von Willebrand factor C domain containing 2	7	3.11091	-1.63461	0.0342288	375567
ENSG00000153162	BMP6	bone morphogenetic protein 6	6	-1.57404	2.98913	0.0360813	654
ENSG00000187170	LCE4A	late cornified envelope 4A	1	2.48724	-4.72332	0.0362767	199834
ENSG00000166448	TMEM130	transmembrane protein 130	7	-2.071	0.52789	0.0369874	222865
ENSG00000157087	ATP2B2	ATPase, Ca++ transporting, plasma membrane 2	3	-3.00598	-3.51716	0.0370522	491
ENSG00000257150	PGAM1P5	phosphoglycerate mutase 1 pseudogene 5	12	-2.99813	-2.96193	0.0374136	100132594
ENSG00000205867	KRTAP5-2	keratin associated protein 5-2	11	-2.5064	-4.93071	0.038219	440021
ENSG00000248479	RP11-807H7.2		4	-3.18842	-4.509	0.0398455	NA
ENSG00000198535	C2CD4A	C2 calcium-dependent domain containing 4A	15	-2.50481	-4.04003	0.0414841	145741
ENSG00000259040	BLOC1S5-TXNDC5	BLOC1S5-TXNDC5 readthrough (NMD candidate)	6	-1.6058	-0.399704	0.0424892	NA
ENSG00000121769	FABP3	fatty acid binding protein 3, muscle and heart	1	1.83851	5.93142	0.0426099	2170
ENSG00000169436	COL22A1	collagen, type XXII, alpha 1	8	3.42077	-3.26042	0.0445425	169044
ENSG00000250508	RP11-757G1.6		11	2.20187	-2.32652	0.0458344	105369364
ENSG00000169507	SLC38A11	solute carrier family 38, member 11	2	2.11233	-2.12266	0.0458344	151258
ENSG00000112972	HMGCS1	3-hydroxy-3-methylglutaryl-CoA synthase 1 (soluble)	5	0.91182	6.2937	0.0493311	3157
ENSG00000172893	DHCR7	7-dehydrocholesterol reductase	11	0.981237	5.38222	0.0512838	1717
ENSG00000174015	SPERT	spermatid associated	13	-2.34522	-4.87129	0.0512838	220082
ENSG00000230739	RP11-331H2.4		1	-2.41131	-4.94308	0.051618	NA
ENSG00000214207	KRT18P10	keratin 18 pseudogene 10	Y	-2.53723	-4.70571	0.051827	NA
ENSG00000184613	NELL2	neural EGFL like 2	12	2.54588	-2.55494	0.0521324	4753
ENSG00000215317	THUMPD1P1	THUMP domain containing 1 pseudogene 1	21	3.04583	-4.74506	0.0523773	NA
ENSG00000185352	HS6ST3	heparan sulfate 6-O-sulfotransferase 3	13	2.20586	0.974085	0.0550301	266722
ENSG00000144057	ST6GAL2	ST6 beta-galactosamide alpha-2,6-sialyltranferase 2	2	-3.1583	-2.79452	0.0569539	84620
ENSG00000231324	AP000696.2		21	2.71921	-4.59523	0.0595915	NA
ENSG00000237438	CECR7	cat eye syndrome chromosome region, candidate 7 (non-protein coding)	22	1.24654	1.85582	0.0601053	100130418
ENSG00000132164	SLC6A11	solute carrier family 6 (neurotransmitter transporter), member 11	3	2.53339	-4.38291	0.0601053	6538
ENSG00000162706	CADM3	cell adhesion molecule 3	1	2.27387	-3.41813	0.0614574	57863
ENSG00000268089	GABRQ	gamma-aminobutyric acid (GABA) A receptor, theta	X	-2.55604	-1.12967	0.0614574	55879
ENSG00000241104	CEACAMP10	carcinoembryonic antigen-related cell adhesion molecule pseudogene 10	19	2.28694	-2.86236	0.0696836	284344
ENSG00000153404	PLEKHG4B	pleckstrin homology domain containing, family G (with RhoGef domain) member 4B	5	-2.79718	-1.71966	0.0699501	153478
ENSG00000143631	FLG	filaggrin	1	-2.95156	4.83814	0.0699501	2312
ENSG00000125810	CD93	CD93 molecule	20	-2.81474	-3.95689	0.0712815	22918
ENSG00000124731	TREM1	triggering receptor expressed on myeloid cells 1	6	2.96332	-4.40169	0.0716926	54210
ENSG00000198203	SULT1C2	sulfotransferase family, cytosolic, 1C, member 2	2	2.90819	-2.0416	0.0730424	6819
ENSG00000113161	HMGCR	3-hydroxy-3-methylglutaryl-CoA reductase	5	0.620405	5.95553	0.0762803	3156
ENSG00000223414	LINC00473	long intergenic non-protein coding RNA 473	6	-3.17383	-3.23758	0.0777868	90632
ENSG00000160752	FDPS	farnesyl diphosphate synthase	1	0.753392	6.58104	0.0826632	2224
ENSG00000171388	APLN	apelin	X	1.56538	2.8075	0.0834779	8862
ENSG00000163737	PF4	platelet factor 4	4	2.4901	-4.09668	0.0834914	5196
ENSG00000233611	AC079135.1		2	-2.82893	-4.51035	0.085718	NA
ENSG00000213706	AL590762.7		X	-2.70594	-4.18876	0.085718	NA
ENSG00000173809	TDRD12	tudor domain containing 12	19	-1.79499	-1.69979	0.085718	91646
ENSG00000270412	RP11-92C4.6		9	-1.47782	-0.671167	0.085718	NA
ENSG00000274204	RP11-272L14.2		13	-2.40675	-3.89703	0.085718	NA
ENSG00000129646	QRICH2	glutamine rich 2	17	-0.893622	1.06638	0.085718	84074
ENSG00000145087	STXBP5L	syntaxin binding protein 5-like	3	-2.75165	-3.69274	0.0898948	9515
ENSG00000157502	MUM1L1	melanoma associated antigen (mutated) 1-like 1	X	2.2416	-4.7844	0.0902733	139221
ENSG00000185610	DBX2	developing brain homeobox 2	12	3.06691	-2.42489	0.0931898	440097
ENSG00000278739	MIR6859-4	microRNA 6859-4	16	-1.73103	-3.98136	0.0931898	103504738
ENSG00000175664	TEX26	testis expressed 26	13	2.27632	-4.08198	0.0951896	122046
ENSG00000127124	HIVEP3	human immunodeficiency virus type I enhancer binding protein 3	1	-1.05318	2.62418	0.0961828	59269
ENSG00000257319	RP11-478B9.1		12	2.26156	-4.96493	0.0986727	NA

## Sheet: Gender_EQLF_GO
GoId	Term	Ont	N	DE	P.DE
GO:0006695	cholesterol biosynthetic process	BP	49	5	7.15189e-06
GO:1902653	secondary alcohol biosynthetic process	BP	49	5	7.15189e-06
GO:0016126	sterol biosynthetic process	BP	54	5	1.16062e-05
GO:0006694	steroid biosynthetic process	BP	151	6	0.000186028
GO:0046165	alcohol biosynthetic process	BP	152	6	0.000192821
GO:0008299	isoprenoid biosynthetic process	BP	26	3	0.000382543
GO:0034720	histone H3-K4 demethylation	BP	6	2	0.000442568
GO:0032453	histone demethylase activity (H3-K4 specific)	MF	6	2	0.000442568
GO:0008203	cholesterol metabolic process	BP	121	5	0.000545707
GO:1902652	secondary alcohol metabolic process	BP	124	5	0.000610103
GO:0032452	histone demethylase activity	MF	33	3	0.000780668
GO:0016125	sterol metabolic process	BP	132	5	0.000809727
GO:0070076	histone lysine demethylation	BP	35	3	0.00092906
GO:0016577	histone demethylation	BP	36	3	0.00100949
GO:0008202	steroid metabolic process	BP	286	7	0.0010176
GO:0006482	protein demethylation	BP	38	3	0.00118328
GO:0008214	protein dealkylation	BP	38	3	0.00118328
GO:0035264	multicellular organism growth	BP	147	5	0.00131037
GO:0009150	purine ribonucleotide metabolic process	BP	480	9	0.00131084
GO:0032451	demethylase activity	MF	41	3	0.0014775
GO:0009259	ribonucleotide metabolic process	BP	495	9	0.00161995
GO:1901617	organic hydroxy compound biosynthetic process	BP	229	6	0.00166253
GO:0032940	secretion by cell	BP	927	13	0.00167899
GO:0006163	purine nucleotide metabolic process	BP	502	9	0.001783
GO:0046903	secretion	BP	1054	14	0.00184306
GO:0019693	ribose phosphate metabolic process	BP	507	9	0.00190735
GO:0043950	positive regulation of cAMP-mediated signaling	BP	13	2	0.00224426
GO:0003148	outflow tract septum morphogenesis	BP	13	2	0.00224426
GO:0032501	multicellular organismal process	BP	6845	52	0.00234782
GO:0044057	regulation of system process	BP	434	8	0.00270757
GO:0009117	nucleotide metabolic process	BP	644	10	0.0028565
GO:0051240	positive regulation of multicellular organismal process	BP	1355	16	0.0028632
GO:0023061	signal release	BP	440	8	0.00294457
GO:1901615	organic hydroxy compound metabolic process	BP	542	9	0.00298536
GO:0006753	nucleoside phosphate metabolic process	BP	651	10	0.00308597
GO:0046883	regulation of hormone secretion	BP	260	6	0.00313369
GO:0072521	purine-containing compound metabolic process	BP	546	9	0.0031343
GO:0010664	negative regulation of striated muscle cell apoptotic process	BP	16	2	0.00341581
GO:0019933	cAMP-mediated signaling	BP	56	3	0.0036201
GO:0002066	columnar/cuboidal epithelial cell development	BP	57	3	0.00380611
GO:0045236	CXCR chemokine receptor binding	MF	17	2	0.00385742
GO:0031649	heat generation	BP	18	2	0.0043241
GO:0010665	regulation of cardiac muscle cell apoptotic process	BP	18	2	0.0043241
GO:0009187	cyclic nucleotide metabolic process	BP	197	5	0.00464983
GO:0055012	ventricular cardiac muscle cell differentiation	BP	19	2	0.00481557
GO:0005859	muscle myosin complex	CC	19	2	0.00481557
GO:0006941	striated muscle contraction	BP	124	4	0.0048779
GO:0055086	nucleobase-containing small molecule metabolic process	BP	703	10	0.00529026
GO:0045299	otolith mineralization	BP	1	1	0.00549843
GO:0003168	Purkinje myocyte differentiation	BP	1	1	0.00549843
GO:0060927	cardiac pacemaker cell fate commitment	BP	1	1	0.00549843
GO:0060929	atrioventricular node cell fate commitment	BP	1	1	0.00549843
GO:0042404	thyroid hormone catabolic process	BP	1	1	0.00549843
GO:0009645	response to low light intensity stimulus	BP	1	1	0.00549843
GO:0046690	response to tellurium ion	BP	1	1	0.00549843
GO:1903639	regulation of gastrin-induced gastric acid secretion	BP	1	1	0.00549843
GO:1903640	negative regulation of gastrin-induced gastric acid secretion	BP	1	1	0.00549843
GO:0004940	beta1-adrenergic receptor activity	MF	1	1	0.00549843
GO:0047598	7-dehydrocholesterol reductase activity	MF	1	1	0.00549843
GO:0033798	thyroxine 5-deiodinase activity	MF	1	1	0.00549843
GO:0034899	trimethylamine monooxygenase activity	MF	1	1	0.00549843
GO:0004420	hydroxymethylglutaryl-CoA reductase (NADPH) activity	MF	1	1	0.00549843
GO:0042282	hydroxymethylglutaryl-CoA reductase activity	MF	1	1	0.00549843
GO:0000254	C-4 methylsterol oxidase activity	MF	1	1	0.00549843
GO:1990738	pseudouridine 5'-phosphatase activity	MF	1	1	0.00549843
GO:0042311	vasodilation	BP	65	3	0.00550489
GO:0070988	demethylation	BP	65	3	0.00550489
GO:0010662	regulation of striated muscle cell apoptotic process	BP	21	2	0.00587175
GO:0030509	BMP signaling pathway	BP	131	4	0.00591746
GO:0019935	cyclic-nucleotide-mediated signaling	BP	67	3	0.00598984
GO:1903530	regulation of secretion by cell	BP	604	9	0.00603057
GO:0007267	cell-cell signaling	BP	1211	14	0.00638526
GO:0010659	cardiac muscle cell apoptotic process	BP	22	2	0.0064359
GO:0032982	myosin filament	CC	22	2	0.0064359
GO:0000146	microfilament motor activity	MF	22	2	0.0064359
GO:0090276	regulation of peptide hormone secretion	BP	213	5	0.00644054
GO:1903532	positive regulation of secretion by cell	BP	302	6	0.00645789
GO:0005125	cytokine activity	MF	217	5	0.00695459
GO:0046879	hormone secretion	BP	307	6	0.00697853
GO:0043949	regulation of cAMP-mediated signaling	BP	23	2	0.00702373
GO:0002791	regulation of peptide secretion	BP	218	5	0.00708746
GO:0071772	response to BMP	BP	139	4	0.00727521
GO:0071773	cellular response to BMP stimulus	BP	139	4	0.00727521
GO:0040014	regulation of multicellular organism growth	BP	72	3	0.00731142
GO:0002068	glandular epithelial cell development	BP	24	2	0.00763496
GO:0005326	neurotransmitter transporter activity	MF	24	2	0.00763496
GO:0009914	hormone transport	BP	314	6	0.00775779
GO:0010658	striated muscle cell apoptotic process	BP	25	2	0.00826933
GO:0016460	myosin II complex	CC	25	2	0.00826933
GO:0046661	male sex differentiation	BP	146	4	0.0086199
GO:0008015	blood circulation	BP	424	7	0.00890478
GO:0003013	circulatory system process	BP	426	7	0.00912429
GO:1903522	regulation of blood circulation	BP	232	5	0.00913866
GO:0010656	negative regulation of muscle cell apoptotic process	BP	27	2	0.00960639
GO:0016705	oxidoreductase activity, acting on paired donors, with incorporation or reduction of molecular oxygen	MF	153	4	0.0101179
GO:0051047	positive regulation of secretion	BP	334	6	0.0103293
GO:0051046	regulation of secretion	BP	659	9	0.0103762
GO:0032941	secretion by tissue	BP	82	3	0.0104374
GO:0019905	syntaxin binding	MF	82	3	0.0104374
GO:0044707	single-multicellular organism process	BP	6602	48	0.0106254
GO:0032346	positive regulation of aldosterone metabolic process	BP	2	1	0.0109669
GO:0032349	positive regulation of aldosterone biosynthetic process	BP	2	1	0.0109669
GO:2000855	regulation of mineralocorticoid secretion	BP	2	1	0.0109669
GO:2000857	positive regulation of mineralocorticoid secretion	BP	2	1	0.0109669
GO:2000858	regulation of aldosterone secretion	BP	2	1	0.0109669
GO:2000860	positive regulation of aldosterone secretion	BP	2	1	0.0109669
GO:0003342	proepicardium development	BP	2	1	0.0109669
GO:0003343	septum transversum development	BP	2	1	0.0109669
GO:0090274	positive regulation of somatostatin secretion	BP	2	1	0.0109669
GO:0003165	Purkinje myocyte development	BP	2	1	0.0109669
GO:0003221	right ventricular cardiac muscle tissue morphogenesis	BP	2	1	0.0109669
GO:0060922	atrioventricular node cell differentiation	BP	2	1	0.0109669
GO:0060928	atrioventricular node cell development	BP	2	1	0.0109669
GO:0060932	His-Purkinje system cell differentiation	BP	2	1	0.0109669
GO:0033383	geranyl diphosphate metabolic process	BP	2	1	0.0109669
GO:0033384	geranyl diphosphate biosynthetic process	BP	2	1	0.0109669
GO:0045337	farnesyl diphosphate biosynthetic process	BP	2	1	0.0109669
GO:0021568	rhombomere 2 development	BP	2	1	0.0109669
GO:0001698	gastrin-induced gastric acid secretion	BP	2	1	0.0109669
GO:0090187	positive regulation of pancreatic juice secretion	BP	2	1	0.0109669
GO:0051466	positive regulation of corticotropin-releasing hormone secretion	BP	2	1	0.0109669
GO:0010736	serum response element binding	MF	2	1	0.0109669
GO:0070538	oleic acid binding	MF	2	1	0.0109669
GO:0004161	dimethylallyltranstransferase activity	MF	2	1	0.0109669
GO:0004337	geranyltranstransferase activity	MF	2	1	0.0109669
GO:0004421	hydroxymethylglutaryl-CoA synthase activity	MF	2	1	0.0109669
GO:0003835	beta-galactoside alpha-2,6-sialyltransferase activity	MF	2	1	0.0109669
GO:0031704	apelin receptor binding	MF	2	1	0.0109669
GO:0045523	interleukin-27 receptor binding	MF	2	1	0.0109669
GO:0032090	Pyrin domain binding	MF	2	1	0.0109669
GO:1903524	positive regulation of blood circulation	BP	84	3	0.0111419
GO:0019637	organophosphate metabolic process	BP	1040	12	0.0116364
GO:0002026	regulation of the force of heart contraction	BP	30	2	0.0117789
GO:0051213	dioxygenase activity	MF	87	3	0.012249
GO:0030816	positive regulation of cAMP metabolic process	BP	88	3	0.0126316
GO:0008016	regulation of heart contraction	BP	165	4	0.0130605
GO:0030072	peptide hormone secretion	BP	254	5	0.0131373
GO:0045214	sarcomere organization	BP	32	2	0.0133354
GO:0045823	positive regulation of heart contraction	BP	32	2	0.0133354
GO:1903523	negative regulation of blood circulation	BP	32	2	0.0133354
GO:0016491	oxidoreductase activity	MF	688	9	0.0134572
GO:0060322	head development	BP	693	9	0.0140508
GO:1901360	organic cyclic compound metabolic process	BP	5837	43	0.0141004
GO:0007589	body fluid secretion	BP	92	3	0.0142301
GO:0002790	peptide secretion	BP	261	5	0.0146238
GO:0006413	translational initiation	BP	261	5	0.0146238
GO:0031016	pancreas development	BP	93	3	0.0146469
GO:0003008	system process	BP	1896	18	0.014665
GO:0044281	small molecule metabolic process	BP	2486	22	0.0149962
GO:0090087	regulation of peptide transport	BP	264	5	0.0152941
GO:0009306	protein secretion	BP	474	7	0.0156721
GO:0019433	triglyceride catabolic process	BP	35	2	0.0158275
GO:0040018	positive regulation of multicellular organism growth	BP	35	2	0.0158275
GO:0010817	regulation of hormone levels	BP	476	7	0.0160025
GO:0005516	calmodulin binding	MF	176	4	0.016194
GO:0002025	vasodilation by norepinephrine-epinephrine involved in regulation of systemic arterial blood pressure	BP	3	1	0.0164057
GO:0090273	regulation of somatostatin secretion	BP	3	1	0.0164057
GO:0003162	atrioventricular node development	BP	3	1	0.0164057
GO:0003285	septum secundum development	BP	3	1	0.0164057
GO:0003350	pulmonary myocardium development	BP	3	1	0.0164057
GO:0055005	ventricular cardiac myofibril assembly	BP	3	1	0.0164057
GO:0055011	atrial cardiac muscle cell differentiation	BP	3	1	0.0164057
GO:0055014	atrial cardiac muscle cell development	BP	3	1	0.0164057
GO:0046684	response to pyrethroid	BP	3	1	0.0164057
GO:0070945	neutrophil mediated killing of gram-negative bacterium	BP	3	1	0.0164057
GO:0045338	farnesyl diphosphate metabolic process	BP	3	1	0.0164057
GO:0043396	corticotropin-releasing hormone secretion	BP	3	1	0.0164057
GO:0043397	regulation of corticotropin-releasing hormone secretion	BP	3	1	0.0164057
GO:0036457	keratohyalin granule	CC	3	1	0.0164057
GO:0030899	calcium-dependent ATPase activity	MF	3	1	0.0164057
GO:0004800	thyroxine 5'-deiodinase activity	MF	3	1	0.0164057
GO:0004967	glucagon receptor activity	MF	3	1	0.0164057
GO:0017095	heparan sulfate 6-O-sulfotransferase activity	MF	3	1	0.0164057
GO:0048566	embryonic digestive tract development	BP	36	2	0.0166992
GO:0001659	temperature homeostasis	BP	37	2	0.0175909
GO:0033865	nucleoside bisphosphate metabolic process	BP	37	2	0.0175909
GO:0033875	ribonucleoside bisphosphate metabolic process	BP	37	2	0.0175909
GO:0034032	purine nucleoside bisphosphate metabolic process	BP	37	2	0.0175909
GO:0003009	skeletal muscle contraction	BP	37	2	0.0175909
GO:0050708	regulation of protein secretion	BP	379	6	0.0182348
GO:0048513	organ development	BP	2995	25	0.0186469
GO:0006066	alcohol metabolic process	BP	382	6	0.0188772
GO:0060047	heart contraction	BP	185	4	0.0190814
GO:0046461	neutral lipid catabolic process	BP	39	2	0.0194336
GO:0046464	acylglycerol catabolic process	BP	39	2	0.0194336
GO:0030049	muscle filament sliding	BP	39	2	0.0194336
GO:0033275	actin-myosin filament sliding	BP	39	2	0.0194336
GO:0044060	regulation of endocrine process	BP	39	2	0.0194336
GO:0005844	polysome	CC	39	2	0.0194336
GO:0050905	neuromuscular process	BP	104	3	0.0196873
GO:0003015	heart process	BP	187	4	0.0197636
GO:0050714	positive regulation of protein secretion	BP	188	4	0.0201103
GO:0007275	multicellular organismal development	BP	4782	36	0.0203172
GO:0022627	cytosolic small ribosomal subunit	CC	40	2	0.020384
GO:0008028	monocarboxylic acid transmembrane transporter activity	MF	40	2	0.020384
GO:0070588	calcium ion transmembrane transport	BP	191	4	0.0211728
GO:0046887	positive regulation of hormone secretion	BP	107	3	0.021208
GO:0042312	regulation of vasodilation	BP	41	2	0.0213536
GO:0010660	regulation of muscle cell apoptotic process	BP	41	2	0.0213536
GO:0007595	lactation	BP	41	2	0.0213536
GO:0042093	T-helper cell differentiation	BP	41	2	0.0213536
GO:0030801	positive regulation of cyclic nucleotide metabolic process	BP	108	3	0.0217288
GO:0001997	positive regulation of the force of heart contraction by epinephrine-norepinephrine	BP	4	1	0.0218148
GO:0045918	negative regulation of cytolysis	BP	4	1	0.0218148
GO:0090031	positive regulation of steroid hormone biosynthetic process	BP	4	1	0.0218148
GO:0003166	bundle of His development	BP	4	1	0.0218148
GO:0021555	midbrain-hindbrain boundary morphogenesis	BP	4	1	0.0218148
GO:0051380	norepinephrine binding	MF	4	1	0.0218148
GO:0004939	beta-adrenergic receptor activity	MF	4	1	0.0218148
GO:0005324	long-chain fatty acid transporter activity	MF	4	1	0.0218148
GO:0035727	lysophosphatidic acid binding	MF	4	1	0.0218148
GO:0001601	peptide YY receptor activity	MF	4	1	0.0218148
GO:0001602	pancreatic polypeptide receptor activity	MF	4	1	0.0218148
GO:0005332	gamma-aminobutyric acid:sodium symporter activity	MF	4	1	0.0218148
GO:0046676	negative regulation of insulin secretion	BP	42	2	0.022342
GO:0016709	oxidoreductase activity, acting on paired donors, with incorporation or reduction of molecular oxygen, NAD(P)H as one donor, and incorporation of one atom of oxygen	MF	42	2	0.022342
GO:0060986	endocrine hormone secretion	BP	43	2	0.0233491
GO:0002294	CD4-positive, alpha-beta T cell differentiation involved in immune response	BP	43	2	0.0233491
GO:0010501	RNA secondary structure unwinding	BP	43	2	0.0233491
GO:0033500	carbohydrate homeostasis	BP	199	4	0.024173
GO:0042593	glucose homeostasis	BP	199	4	0.024173
GO:0045776	negative regulation of blood pressure	BP	44	2	0.0243746
GO:0032330	regulation of chondrocyte differentiation	BP	44	2	0.0243746
GO:1902930	regulation of alcohol biosynthetic process	BP	44	2	0.0243746
GO:0002287	alpha-beta T cell activation involved in immune response	BP	44	2	0.0243746
GO:0002293	alpha-beta T cell differentiation involved in immune response	BP	44	2	0.0243746
GO:0005544	calcium-dependent phospholipid binding	MF	44	2	0.0243746
GO:0016706	oxidoreductase activity, acting on paired donors, with incorporation or reduction of molecular oxygen, 2-oxoglutarate as one donor, and incorporation of one atom each of oxygen into both donors	MF	44	2	0.0243746
GO:0050661	NADP binding	MF	44	2	0.0243746
GO:0008542	visual learning	BP	45	2	0.0254183
GO:0000149	SNARE binding	MF	116	3	0.0261468
GO:0046068	cGMP metabolic process	BP	46	2	0.0264799
GO:0090278	negative regulation of peptide hormone secretion	BP	46	2	0.0264799
GO:0010657	muscle cell apoptotic process	BP	46	2	0.0264799
GO:0097110	scaffold protein binding	MF	46	2	0.0264799
GO:0008009	chemokine activity	MF	46	2	0.0264799
GO:0031328	positive regulation of cellular biosynthetic process	BP	1734	16	0.0269695
GO:0045908	negative regulation of vasodilation	BP	5	1	0.0271945
GO:0001996	positive regulation of heart rate by epinephrine-norepinephrine	BP	5	1	0.0271945
GO:0003099	positive regulation of the force of heart contraction by chemical signal	BP	5	1	0.0271945
GO:0070253	somatostatin secretion	BP	5	1	0.0271945
GO:0003164	His-Purkinje system development	BP	5	1	0.0271945
GO:0003278	apoptotic process involved in heart morphogenesis	BP	5	1	0.0271945
GO:0010735	positive regulation of transcription via serum response element binding	BP	5	1	0.0271945
GO:0051891	positive regulation of cardioblast differentiation	BP	5	1	0.0271945
GO:0060926	cardiac pacemaker cell development	BP	5	1	0.0271945
GO:0060971	embryonic heart tube left/right pattern formation	BP	5	1	0.0271945
GO:1901387	positive regulation of voltage-gated calcium channel activity	BP	5	1	0.0271945
GO:0070944	neutrophil mediated killing of bacterium	BP	5	1	0.0271945
GO:0071557	histone H3-K27 demethylation	BP	5	1	0.0271945
GO:0015015	heparan sulfate proteoglycan biosynthetic process, enzymatic modification	BP	5	1	0.0271945
GO:0046912	transferase activity, transferring acyl groups, acyl groups converted into alkyl on transfer	MF	5	1	0.0271945
GO:0034711	inhibin binding	MF	5	1	0.0271945
GO:0031694	alpha-2A adrenergic receptor binding	MF	5	1	0.0271945
GO:0005004	GPI-linked ephrin receptor activity	MF	5	1	0.0271945
GO:0004499	N,N-dimethylaniline monooxygenase activity	MF	5	1	0.0271945
GO:0048248	CXCR3 chemokine receptor binding	MF	5	1	0.0271945
GO:0086006	voltage-gated sodium channel activity involved in cardiac muscle cell action potential	MF	5	1	0.0271945
GO:0015185	gamma-aminobutyric acid transmembrane transporter activity	MF	5	1	0.0271945
GO:0071558	histone demethylase activity (H3-K27 specific)	MF	5	1	0.0271945
GO:0042127	regulation of cell proliferation	BP	1452	14	0.0274505
GO:0050879	multicellular organismal movement	BP	47	2	0.0275592
GO:0050881	musculoskeletal movement	BP	47	2	0.0275592
GO:0061178	regulation of insulin secretion involved in cellular response to glucose stimulus	BP	47	2	0.0275592
GO:0002792	negative regulation of peptide secretion	BP	47	2	0.0275592
GO:0002067	glandular epithelial cell differentiation	BP	47	2	0.0275592
GO:0007420	brain development	BP	654	8	0.0276416
GO:0046890	regulation of lipid biosynthetic process	BP	119	3	0.0279186
GO:0055114	oxidation-reduction process	BP	1046	11	0.0285528
GO:0060411	cardiac septum morphogenesis	BP	48	2	0.0286561
GO:0044767	single-organism developmental process	BP	5572	40	0.0289367
GO:0006720	isoprenoid metabolic process	BP	122	3	0.0297529
GO:0008584	male gonad development	BP	122	3	0.0297529
GO:0046546	development of primary male sexual characteristics	BP	122	3	0.0297529
GO:0046503	glycerolipid catabolic process	BP	49	2	0.0297702
GO:0007632	visual behavior	BP	50	2	0.0309014
GO:0002292	T cell differentiation involved in immune response	BP	50	2	0.0309014
GO:0019843	rRNA binding	MF	50	2	0.0309014
GO:0009891	positive regulation of biosynthetic process	BP	1767	16	0.0314172
GO:0015085	calcium ion transmembrane transporter activity	MF	125	3	0.0316496
GO:0035773	insulin secretion involved in cellular response to glucose stimulus	BP	51	2	0.0320495
GO:0050810	regulation of steroid biosynthetic process	BP	51	2	0.0320495
GO:0001190	transcriptional activator activity, RNA polymerase II transcription factor binding	MF	51	2	0.0320495
GO:0098811	transcriptional repressor activity, RNA polymerase II activating transcription factor binding	MF	51	2	0.0320495
GO:0008146	sulfotransferase activity	MF	51	2	0.0320495
GO:0015833	peptide transport	BP	321	5	0.0321396
GO:0072672	neutrophil extravasation	BP	6	1	0.0325448
GO:0045906	negative regulation of vasoconstriction	BP	6	1	0.0325448
GO:0035931	mineralocorticoid secretion	BP	6	1	0.0325448
GO:0035932	aldosterone secretion	BP	6	1	0.0325448
GO:0048840	otolith development	BP	6	1	0.0325448
GO:0032347	regulation of aldosterone biosynthetic process	BP	6	1	0.0325448
GO:0010663	positive regulation of striated muscle cell apoptotic process	BP	6	1	0.0325448
GO:0010666	positive regulation of cardiac muscle cell apoptotic process	BP	6	1	0.0325448
GO:0051461	positive regulation of corticotropin secretion	BP	6	1	0.0325448
GO:0060920	cardiac pacemaker cell differentiation	BP	6	1	0.0325448
GO:0070942	neutrophil mediated cytotoxicity	BP	6	1	0.0325448
GO:0070943	neutrophil mediated killing of symbiont cell	BP	6	1	0.0325448
GO:0060455	negative regulation of gastric acid secretion	BP	6	1	0.0325448
GO:0045347	negative regulation of MHC class II biosynthetic process	BP	6	1	0.0325448
GO:0003406	retinal pigment epithelium development	BP	6	1	0.0325448
GO:0046069	cGMP catabolic process	BP	6	1	0.0325448
GO:0090186	regulation of pancreatic juice secretion	BP	6	1	0.0325448
GO:0051379	epinephrine binding	MF	6	1	0.0325448
GO:0050543	icosatetraenoic acid binding	MF	6	1	0.0325448
GO:0032027	myosin light chain binding	MF	6	1	0.0325448
GO:0046943	carboxylic acid transmembrane transporter activity	MF	127	3	0.0329486
GO:0003743	translation initiation factor activity	MF	52	2	0.0332142
GO:0007612	learning	BP	128	3	0.0336085
GO:0045981	positive regulation of nucleotide metabolic process	BP	129	3	0.0342752
GO:1900544	positive regulation of purine nucleotide metabolic process	BP	129	3	0.0342752
GO:0005342	organic acid transmembrane transporter activity	MF	130	3	0.0349487
GO:0030239	myofibril assembly	BP	54	2	0.0355926
GO:0046889	positive regulation of lipid biosynthetic process	BP	54	2	0.0355926
GO:0060350	endochondral bone morphogenesis	BP	54	2	0.0355926
GO:0043367	CD4-positive, alpha-beta T cell differentiation	BP	54	2	0.0355926
GO:0030814	regulation of cAMP metabolic process	BP	131	3	0.0356292
GO:0002065	columnar/cuboidal epithelial cell differentiation	BP	131	3	0.0356292
GO:0032502	developmental process	BP	5656	40	0.0364176
GO:0002831	regulation of response to biotic stimulus	BP	227	4	0.036629
GO:0050885	neuromuscular process controlling balance	BP	55	2	0.0368059
GO:0007610	behavior	BP	694	8	0.0373314
GO:0046886	positive regulation of hormone biosynthetic process	BP	7	1	0.0378661
GO:0032344	regulation of aldosterone metabolic process	BP	7	1	0.0378661
GO:2000848	positive regulation of corticosteroid hormone secretion	BP	7	1	0.0378661
GO:0044539	long-chain fatty acid import	BP	7	1	0.0378661
GO:0019336	phenol-containing compound catabolic process	BP	7	1	0.0378661
GO:0051459	regulation of corticotropin secretion	BP	7	1	0.0378661
GO:0051890	regulation of cardioblast differentiation	BP	7	1	0.0378661
GO:0042447	hormone catabolic process	BP	7	1	0.0378661
GO:0071073	positive regulation of phospholipid biosynthetic process	BP	7	1	0.0378661
GO:0001849	complement component C1q binding	MF	7	1	0.0378661
GO:0003708	retinoic acid receptor activity	MF	7	1	0.0378661
GO:0042379	chemokine receptor binding	MF	56	2	0.038035
GO:0050880	regulation of blood vessel size	BP	137	3	0.0398548
GO:0042886	amide transport	BP	342	5	0.0404592
GO:0035150	regulation of tube size	BP	138	3	0.0405828
GO:0061337	cardiac conduction	BP	59	2	0.041815
GO:0003151	outflow tract morphogenesis	BP	60	2	0.0431052
GO:0035710	CD4-positive, alpha-beta T cell activation	BP	60	2	0.0431052
GO:0060923	cardiac muscle cell fate commitment	BP	8	1	0.0431583
GO:0003321	positive regulation of blood pressure by epinephrine-norepinephrine	BP	8	1	0.0431583
GO:0003057	regulation of the force of heart contraction by chemical signal	BP	8	1	0.0431583
GO:0042756	drinking behavior	BP	8	1	0.0431583
GO:0042268	regulation of cytolysis	BP	8	1	0.0431583
GO:0010566	regulation of ketone biosynthetic process	BP	8	1	0.0431583
GO:0031666	positive regulation of lipopolysaccharide-mediated signaling pathway	BP	8	1	0.0431583
GO:0051852	disruption by host of symbiont cells	BP	8	1	0.0431583
GO:0051873	killing by host of symbiont cells	BP	8	1	0.0431583
GO:0051458	corticotropin secretion	BP	8	1	0.0431583
GO:2000020	positive regulation of male gonad development	BP	8	1	0.0431583
GO:0021546	rhombomere development	BP	8	1	0.0431583
GO:0060371	regulation of atrial cardiac muscle cell membrane depolarization	BP	8	1	0.0431583
GO:0060453	regulation of gastric acid secretion	BP	8	1	0.0431583
GO:0072540	T-helper 17 cell lineage commitment	BP	8	1	0.0431583
GO:0034144	negative regulation of toll-like receptor 4 signaling pathway	BP	8	1	0.0431583
GO:0015718	monocarboxylic acid transport	BP	143	3	0.0443234
GO:0003012	muscle system process	BP	351	5	0.0443913
GO:0070252	actin-mediated cell contraction	BP	61	2	0.0444102
GO:0030900	forebrain development	BP	352	5	0.0448419
GO:0007283	spermatogenesis	BP	471	6	0.0455162
GO:0061035	regulation of cartilage development	BP	62	2	0.0457298
GO:0048232	male gamete generation	BP	472	6	0.0459047
GO:0042446	hormone biosynthetic process	BP	63	2	0.0470637
GO:0004004	ATP-dependent RNA helicase activity	MF	63	2	0.0470637
GO:0008186	RNA-dependent ATPase activity	MF	63	2	0.0470637
GO:0008201	heparin binding	MF	148	3	0.0482303
GO:0016782	transferase activity, transferring sulfur-containing groups	MF	64	2	0.0484119
GO:0001993	regulation of systemic arterial blood pressure by norepinephrine-epinephrine	BP	9	1	0.0484218
GO:0061179	negative regulation of insulin secretion involved in cellular response to glucose stimulus	BP	9	1	0.0484218
GO:0002024	diet induced thermogenesis	BP	9	1	0.0484218
GO:1990845	adaptive thermogenesis	BP	9	1	0.0484218
GO:0021684	cerebellar granular layer formation	BP	9	1	0.0484218
GO:0021707	cerebellar granule cell differentiation	BP	9	1	0.0484218
GO:0032342	aldosterone biosynthetic process	BP	9	1	0.0484218
GO:0060586	multicellular organismal iron ion homeostasis	BP	9	1	0.0484218
GO:2000833	positive regulation of steroid hormone secretion	BP	9	1	0.0484218
GO:0017085	response to insecticide	BP	9	1	0.0484218
GO:0045625	regulation of T-helper 1 cell differentiation	BP	9	1	0.0484218
GO:0070050	neuron cellular homeostasis	BP	9	1	0.0484218
GO:0071372	cellular response to follicle-stimulating hormone stimulus	BP	9	1	0.0484218
GO:2000018	regulation of male gonad development	BP	9	1	0.0484218
GO:0030917	midbrain-hindbrain boundary development	BP	9	1	0.0484218
GO:0005388	calcium-transporting ATPase activity	MF	9	1	0.0484218
GO:0070700	BMP receptor binding	MF	9	1	0.0484218
GO:0005005	transmembrane-ephrin receptor activity	MF	9	1	0.0484218
GO:0008610	lipid biosynthetic process	BP	603	7	0.0484972
GO:0051050	positive regulation of transport	BP	867	9	0.0490576
GO:0001664	G-protein coupled receptor binding	MF	250	4	0.0491824
GO:0005615	extracellular space	CC	1286	12	0.0494644
GO:0003724	RNA helicase activity	MF	65	2	0.049774

## Sheet: Gender_EQLF_KEGG
KeggId	Pathway	N	DE	P.DE
path:hsa00900	Terpenoid backbone biosynthesis	22	3	5.56935e-06
path:hsa00100	Steroid biosynthesis	20	2	0.000457421
path:hsa04080	Neuroactive ligand-receptor interaction	276	4	0.000939796
path:hsa04261	Adrenergic signaling in cardiomyocytes	147	3	0.0016354
path:hsa03013	RNA transport	170	3	0.00247348
path:hsa01100	Metabolic pathways	1232	7	0.00294901
path:hsa03320	PPAR signaling pathway	72	2	0.00584154
path:hsa04060	Cytokine-cytokine receptor interaction	263	3	0.00832774
path:hsa04727	GABAergic synapse	88	2	0.00861011
path:hsa04970	Salivary secretion	88	2	0.00861011
path:hsa05414	Dilated cardiomyopathy	89	2	0.00879928
path:hsa04919	Thyroid hormone signaling pathway	118	2	0.01507
path:hsa00072	Synthesis and degradation of ketone bodies	10	1	0.0157462
path:hsa03010	Ribosome	134	2	0.0191471
path:hsa04530	Tight junction	139	2	0.0205064
path:hsa04514	Cell adhesion molecules (CAMs)	141	2	0.0210611
path:hsa04022	cGMP-PKG signaling pathway	166	2	0.0285088
path:hsa04360	Axon guidance	175	2	0.0314132
path:hsa04020	Calcium signaling pathway	178	2	0.0324065
path:hsa04062	Chemokine signaling pathway	184	2	0.0344299
path:hsa00534	Glycosaminoglycan biosynthesis - heparan sulfate / heparin	24	1	0.0373853
path:hsa04024	cAMP signaling pathway	198	2	0.0393373
path:hsa00650	Butanoate metabolism	28	1	0.0434822
path:hsa00514	Other types of O-glycan biosynthesis	31	1	0.0480302

## Sheet: Location_EQLF_DE_genes
gene_id	gene_name	descr	seqid	logFC	logCPM	FDR	entrez
ENSG00000248954	RP11-304F15.4		17	9.34377	-0.374121	0.000942706	NA
ENSG00000241157	RP11-3K24.1		17	5.4437	-1.24982	0.00407591	NA
ENSG00000197406	DIO3	deiodinase, iodothyronine, type III	14	-5.92842	-0.816283	0.00765208	1735
ENSG00000130433	CACNG6	calcium channel, voltage-dependent, gamma subunit 6	19	-6.13141	-2.79281	0.00765208	59285
ENSG00000264006	AKR1C8P	aldo-keto reductase family 1, member C8, pseudogene	10	5.34768	-3.66205	0.00821515	340811
ENSG00000002587	HS3ST1	heparan sulfate (glucosamine) 3-O-sulfotransferase 1	4	3.52913	-1.86417	0.0151386	9957
ENSG00000170477	KRT4	keratin 4, type II	12	-4.54812	-3.25185	0.0151386	3851
ENSG00000160161	CILP2	cartilage intermediate layer protein 2	19	-4.42743	3.00723	0.0151386	148113
ENSG00000240540	RPL3P9	ribosomal protein L3 pseudogene 9	8	-4.95794	-3.13958	0.0151386	NA
ENSG00000264717	CH17-360D5.1		10	-5.02718	-1.57789	0.0151386	NA
ENSG00000112214	FHL5	four and a half LIM domains 5	6	5.16974	-3.20959	0.0151386	9457
ENSG00000165349	SLC7A3	solute carrier family 7 (cationic amino acid transporter, y+ system), member 3	X	-3.97979	-4.39767	0.0161814	84889
ENSG00000185960	SHOX	short stature homeobox	X	-4.25393	-1.6566	0.0161814	6473
ENSG00000281721	LINC01080	long intergenic non-protein coding RNA 1080	13	4.52175	-4.31516	0.0161814	NA
ENSG00000125869	LAMP5	lysosomal-associated membrane protein family, member 5	20	-3.5358	-1.23778	0.0175844	24141
ENSG00000204174	NPY4R	neuropeptide Y receptor Y4	10	-4.84148	-1.48402	0.0175844	5540
ENSG00000255583	RP11-415I12.2		12	3.16544	-3.51284	0.0223956	NA
ENSG00000101197	BIRC7	baculoviral IAP repeat containing 7	20	-2.6433	-4.74771	0.023403	79444
ENSG00000215644	GCGR	glucagon receptor	17	3.59748	-4.55661	0.023403	2642
ENSG00000125798	FOXA2	forkhead box A2	20	3.93686	-4.30155	0.0301104	3170
ENSG00000258498	DIO3OS	DIO3 opposite strand/antisense RNA (head to head)	14	-3.66501	-2.07613	0.0301104	NA
ENSG00000225684	FAM225B	family with sequence similarity 225, member B (non-protein coding)	9	-1.73944	2.555	0.0307676	100128385
ENSG00000183117	CSMD1	CUB and Sushi multiple domains 1	8	4.38375	-1.43004	0.0307676	64478
ENSG00000231528	FAM225A	family with sequence similarity 225, member A (non-protein coding)	9	-1.76111	2.53676	0.0350822	286333
ENSG00000131771	PPP1R1B	protein phosphatase 1, regulatory (inhibitor) subunit 1B	17	2.92913	-3.5121	0.0350822	84152
ENSG00000164736	SOX17	SRY (sex determining region Y)-box 17	8	2.56903	-4.55753	0.0416462	64321
ENSG00000147655	RSPO2	R-spondin 2	8	-2.68408	-2.87065	0.0442415	340419
ENSG00000066382	MPPED2	metallophosphoesterase domain containing 2	11	-2.64071	-1.03198	0.0442415	744
ENSG00000213232	PPP1R2P10	protein phosphatase 1, regulatory (inhibitor) subunit 2 pseudogene 10	13	-3.74111	-4.52989	0.0442415	NA
ENSG00000259974	LINC00261	long intergenic non-protein coding RNA 261	20	3.89094	-4.34507	0.0442415	140828
ENSG00000173432	SAA1	serum amyloid A1	11	-3.69936	-2.63809	0.0448384	6288
ENSG00000253373	RP11-21C17.1		8	3.01168	-4.80459	0.0503383	NA
ENSG00000069122	ADGRF5	adhesion G protein-coupled receptor F5	6	-3.93753	-2.1741	0.0530889	221395
ENSG00000151468	CCDC3	coiled-coil domain containing 3	10	-2.53677	0.0340369	0.0577045	83643
ENSG00000070031	SCT	secretin	11	-3.68805	-3.09637	0.0594313	6343
ENSG00000237952	RPL7AP73	ribosomal protein L7a pseudogene 73	13	9.64083	-0.375497	0.0684125	NA
ENSG00000171772	SYCE1	synaptonemal complex central element protein 1	10	1.82888	-2.36546	0.0684125	93426
ENSG00000161896	IP6K3	inositol hexakisphosphate kinase 3	6	-3.10024	-3.90729	0.0684125	117283
ENSG00000147255	IGSF1	immunoglobulin superfamily, member 1	X	4.36784	-1.22769	0.0684125	3547
ENSG00000277758	SYT15		10	-2.1188	1.60414	0.0693631	83849
ENSG00000248498	ASNSP1	asparagine synthetase pseudogene 1	8	-2.68575	-4.7998	0.0759068	NA
ENSG00000205002	AARD	alanine and arginine rich domain containing protein	8	-2.31772	0.43434	0.0759068	441376
ENSG00000143631	FLG	filaggrin	1	-3.20047	4.83814	0.0789422	2312
ENSG00000000005	TNMD	tenomodulin	X	4.4372	1.14671	0.0800923	64102
ENSG00000237919	RP11-181B18.1		1	2.7136	-4.88691	0.0800923	NA
ENSG00000124731	TREM1	triggering receptor expressed on myeloid cells 1	6	-3.17563	-4.40169	0.0800923	54210
ENSG00000258197	NKX2-2-AS1	NKX2-2 antisense RNA 1	20	2.73915	-4.81207	0.0812807	NA
ENSG00000109063	MYH3	myosin, heavy chain 3, skeletal muscle, embryonic	17	5.41724	7.61553	0.0812807	4621
ENSG00000278982	RP5-1031D4.3		10	-3.03191	-4.89626	0.0812807	NA
ENSG00000185974	GRK1	G protein-coupled receptor kinase 1	13	3.53725	-3.29893	0.0812807	NA
ENSG00000142185	TRPM2	transient receptor potential cation channel, subfamily M, member 2	21	-3.01865	-4.00192	0.0812807	7226
ENSG00000204176	SYT15	synaptotagmin XV	10	-1.90127	1.70918	0.0812807	83849
ENSG00000163394	CCKAR	cholecystokinin A receptor	4	2.32931	-3.43572	0.0812807	886
ENSG00000173809	TDRD12	tudor domain containing 12	19	-1.92793	-1.69979	0.0864275	91646
ENSG00000263681	MIR3197	microRNA 3197	21	-1.96895	-4.46821	0.0925725	100423023
ENSG00000164694	FNDC1	fibronectin type III domain containing 1	6	-2.12106	5.38649	0.0943057	84624

## Sheet: Location_EQLF_GO
GoId	Term	Ont	N	DE	P.DE
GO:0090274	positive regulation of somatostatin secretion	BP	2	2	3.80954e-06
GO:0090273	regulation of somatostatin secretion	BP	3	2	1.14144e-05
GO:0070253	somatostatin secretion	BP	5	2	3.79531e-05
GO:0030157	pancreatic juice secretion	BP	13	2	0.000293097
GO:0071542	dopaminergic neuron differentiation	BP	14	2	0.000341521
GO:0001696	gastric acid secretion	BP	16	2	0.000449237
GO:0023019	signal transduction involved in regulation of gene expression	BP	18	2	0.000571353
GO:0060441	epithelial tube branching involved in lung morphogenesis	BP	28	2	0.00139412
GO:0042404	thyroid hormone catabolic process	BP	1	1	0.00197944
GO:0000433	negative regulation of transcription from RNA polymerase II promoter by glucose	BP	1	1	0.00197944
GO:0000437	carbon catabolite repression of transcription from RNA polymerase II promoter	BP	1	1	0.00197944
GO:2000970	regulation of detection of glucose	BP	1	1	0.00197944
GO:2000971	negative regulation of detection of glucose	BP	1	1	0.00197944
GO:1903639	regulation of gastrin-induced gastric acid secretion	BP	1	1	0.00197944
GO:1903640	negative regulation of gastrin-induced gastric acid secretion	BP	1	1	0.00197944
GO:0001828	inner cell mass cellular morphogenesis	BP	1	1	0.00197944
GO:0003142	cardiogenic plate morphogenesis	BP	1	1	0.00197944
GO:0060807	regulation of transcription from RNA polymerase II promoter involved in definitive endodermal cell fate specification	BP	1	1	0.00197944
GO:0070246	natural killer cell apoptotic process	BP	1	1	0.00197944
GO:0070247	regulation of natural killer cell apoptotic process	BP	1	1	0.00197944
GO:0033798	thyroxine 5-deiodinase activity	MF	1	1	0.00197944
GO:0031751	D4 dopamine receptor binding	MF	1	1	0.00197944
GO:0000831	inositol hexakisphosphate 6-kinase activity	MF	1	1	0.00197944
GO:0032940	secretion by cell	BP	927	7	0.00199117
GO:0008528	G-protein coupled peptide receptor activity	MF	130	3	0.00214456
GO:0001653	peptide receptor activity	MF	133	3	0.00228838
GO:0010470	regulation of gastrulation	BP	36	2	0.00230055
GO:0050878	regulation of body fluid levels	BP	706	6	0.0024113
GO:0021532	neural tube patterning	BP	41	2	0.00297583
GO:0007586	digestion	BP	149	3	0.00315644
GO:0008542	visual learning	BP	45	2	0.00357497
GO:0038188	cholecystokinin signaling pathway	BP	2	1	0.00395506
GO:0060796	regulation of transcription involved in primary germ layer cell fate commitment	BP	2	1	0.00395506
GO:0007493	endodermal cell fate determination	BP	2	1	0.00395506
GO:0045013	carbon catabolite repression of transcription	BP	2	1	0.00395506
GO:0045014	negative regulation of transcription by glucose	BP	2	1	0.00395506
GO:0001698	gastrin-induced gastric acid secretion	BP	2	1	0.00395506
GO:0042489	negative regulation of odontogenesis of dentin-containing tooth	BP	2	1	0.00395506
GO:0090187	positive regulation of pancreatic juice secretion	BP	2	1	0.00395506
GO:0048866	stem cell fate specification	BP	2	1	0.00395506
GO:2000043	regulation of cardiac cell fate specification	BP	2	1	0.00395506
GO:0004951	cholecystokinin receptor activity	MF	2	1	0.00395506
GO:0031749	D2 dopamine receptor binding	MF	2	1	0.00395506
GO:0046903	secretion	BP	1054	7	0.00409133
GO:0007632	visual behavior	BP	50	2	0.00439622
GO:0007584	response to nutrient	BP	174	3	0.00487401
GO:0060425	lung morphogenesis	BP	55	2	0.00529636
GO:0030855	epithelial cell differentiation	BP	585	5	0.00559313
GO:0070945	neutrophil mediated killing of gram-negative bacterium	BP	3	1	0.00592689
GO:0061010	gall bladder development	BP	3	1	0.00592689
GO:0000430	regulation of transcription from RNA polymerase II promoter by glucose	BP	3	1	0.00592689
GO:0000432	positive regulation of transcription from RNA polymerase II promoter by glucose	BP	3	1	0.00592689
GO:2000035	regulation of stem cell division	BP	3	1	0.00592689
GO:0060912	cardiac cell fate specification	BP	3	1	0.00592689
GO:0036457	keratohyalin granule	CC	3	1	0.00592689
GO:0004800	thyroxine 5'-deiodinase activity	MF	3	1	0.00592689
GO:0031750	D3 dopamine receptor binding	MF	3	1	0.00592689
GO:0004967	glucagon receptor activity	MF	3	1	0.00592689
GO:0031752	D5 dopamine receptor binding	MF	3	1	0.00592689
GO:0030324	lung development	BP	187	3	0.00595207
GO:0030323	respiratory tube development	BP	191	3	0.00631025
GO:0035295	tube development	BP	603	5	0.00634694
GO:1903530	regulation of secretion by cell	BP	604	5	0.00639082
GO:0007621	negative regulation of female receptivity	BP	4	1	0.00789491
GO:0003308	negative regulation of Wnt signaling pathway involved in heart development	BP	4	1	0.00789491
GO:0002023	reduction of food intake in response to dietary excess	BP	4	1	0.00789491
GO:0060437	lung growth	BP	4	1	0.00789491
GO:0061031	endodermal digestive tract morphogenesis	BP	4	1	0.00789491
GO:0009730	detection of carbohydrate stimulus	BP	4	1	0.00789491
GO:0009732	detection of hexose stimulus	BP	4	1	0.00789491
GO:0034287	detection of monosaccharide stimulus	BP	4	1	0.00789491
GO:0051594	detection of glucose	BP	4	1	0.00789491
GO:0000429	carbon catabolite regulation of transcription from RNA polymerase II promoter	BP	4	1	0.00789491
GO:0000436	carbon catabolite activation of transcription from RNA polymerase II promoter	BP	4	1	0.00789491
GO:0046016	positive regulation of transcription by glucose	BP	4	1	0.00789491
GO:0060535	trachea cartilage morphogenesis	BP	4	1	0.00789491
GO:0060913	cardiac cell fate determination	BP	4	1	0.00789491
GO:0060214	endocardium formation	BP	4	1	0.00789491
GO:0042662	negative regulation of mesodermal cell fate specification	BP	4	1	0.00789491
GO:0089718	amino acid import across plasma membrane	BP	4	1	0.00789491
GO:0097638	L-arginine import across plasma membrane	BP	4	1	0.00789491
GO:1902765	L-arginine import into cell	BP	4	1	0.00789491
GO:1903400	L-arginine transmembrane transport	BP	4	1	0.00789491
GO:0001601	peptide YY receptor activity	MF	4	1	0.00789491
GO:0001602	pancreatic polypeptide receptor activity	MF	4	1	0.00789491
GO:0090276	regulation of peptide hormone secretion	BP	213	3	0.00850972
GO:0042277	peptide binding	MF	213	3	0.00850972
GO:0060541	respiratory system development	BP	217	3	0.00895218
GO:0002791	regulation of peptide secretion	BP	218	3	0.00906488
GO:0051046	regulation of secretion	BP	659	5	0.00915018
GO:0008306	associative learning	BP	73	2	0.00916634
GO:0042483	negative regulation of odontogenesis	BP	5	1	0.00985916
GO:0048865	stem cell fate commitment	BP	5	1	0.00985916
GO:0035990	tendon cell differentiation	BP	5	1	0.00985916
GO:0035992	tendon formation	BP	5	1	0.00985916
GO:0070944	neutrophil mediated killing of bacterium	BP	5	1	0.00985916
GO:0001705	ectoderm formation	BP	5	1	0.00985916
GO:0061009	common bile duct development	BP	5	1	0.00985916
GO:0045991	carbon catabolite activation of transcription	BP	5	1	0.00985916
GO:0015819	lysine transport	BP	5	1	0.00985916
GO:0015822	ornithine transport	BP	5	1	0.00985916
GO:1902022	L-lysine transport	BP	5	1	0.00985916
GO:1903352	L-ornithine transmembrane transport	BP	5	1	0.00985916
GO:1903401	L-lysine transmembrane transport	BP	5	1	0.00985916
GO:1903826	arginine transmembrane transport	BP	5	1	0.00985916
GO:0034711	inhibin binding	MF	5	1	0.00985916
GO:0000064	L-ornithine transmembrane transporter activity	MF	5	1	0.00985916
GO:0015181	arginine transmembrane transporter activity	MF	5	1	0.00985916
GO:0015189	L-lysine transmembrane transporter activity	MF	5	1	0.00985916
GO:0047631	ADP-ribose diphosphatase activity	MF	5	1	0.00985916
GO:0000828	inositol hexakisphosphate kinase activity	MF	5	1	0.00985916
GO:0000832	inositol hexakisphosphate 5-kinase activity	MF	5	1	0.00985916
GO:0052723	inositol hexakisphosphate 1-kinase activity	MF	5	1	0.00985916
GO:0052724	inositol hexakisphosphate 3-kinase activity	MF	5	1	0.00985916
GO:0008467	[heparan sulfate]-glucosamine 3-sulfotransferase 1 activity	MF	5	1	0.00985916
GO:0061448	connective tissue development	BP	230	3	0.0104827
GO:0023061	signal release	BP	440	4	0.0107978
GO:0033218	amide binding	MF	235	3	0.0111094
GO:0090277	positive regulation of peptide hormone secretion	BP	81	2	0.0111898
GO:0007610	behavior	BP	694	5	0.0112855
GO:0032941	secretion by tissue	BP	82	2	0.0114553
GO:0030593	neutrophil chemotaxis	BP	82	2	0.0114553
GO:0003348	cardiac endothelial cell differentiation	BP	6	1	0.0118196
GO:0060956	endocardial cell differentiation	BP	6	1	0.0118196
GO:0072672	neutrophil extravasation	BP	6	1	0.0118196
GO:0043091	L-arginine import	BP	6	1	0.0118196
GO:0090467	arginine import	BP	6	1	0.0118196
GO:1902023	L-arginine transport	BP	6	1	0.0118196
GO:0003307	regulation of Wnt signaling pathway involved in heart development	BP	6	1	0.0118196
GO:0033132	negative regulation of glucokinase activity	BP	6	1	0.0118196
GO:1903300	negative regulation of hexokinase activity	BP	6	1	0.0118196
GO:0070942	neutrophil mediated cytotoxicity	BP	6	1	0.0118196
GO:0070943	neutrophil mediated killing of symbiont cell	BP	6	1	0.0118196
GO:0060455	negative regulation of gastric acid secretion	BP	6	1	0.0118196
GO:0045990	carbon catabolite regulation of transcription	BP	6	1	0.0118196
GO:0046015	regulation of transcription by glucose	BP	6	1	0.0118196
GO:0003160	endocardium morphogenesis	BP	6	1	0.0118196
GO:0071421	manganese ion transmembrane transport	BP	6	1	0.0118196
GO:0090186	regulation of pancreatic juice secretion	BP	6	1	0.0118196
GO:1990822	basic amino acid transmembrane transport	BP	6	1	0.0118196
GO:0001826	inner cell mass cell differentiation	BP	6	1	0.0118196
GO:0005384	manganese ion transmembrane transporter activity	MF	6	1	0.0118196
GO:0022600	digestive system process	BP	85	2	0.0122687
GO:0002793	positive regulation of peptide secretion	BP	85	2	0.0122687
GO:1990266	neutrophil migration	BP	87	2	0.0128246
GO:0001708	cell fate specification	BP	88	2	0.0131067
GO:0001664	G-protein coupled receptor binding	MF	250	3	0.0131184
GO:0045446	endothelial cell differentiation	BP	90	2	0.0136789
GO:0030072	peptide hormone secretion	BP	254	3	0.0136871
GO:0035989	tendon development	BP	7	1	0.0137763
GO:0042661	regulation of mesodermal cell fate specification	BP	7	1	0.0137763
GO:2000542	negative regulation of gastrulation	BP	7	1	0.0137763
GO:0019336	phenol-containing compound catabolic process	BP	7	1	0.0137763
GO:0042447	hormone catabolic process	BP	7	1	0.0137763
GO:0009996	negative regulation of cell fate specification	BP	7	1	0.0137763
GO:2000049	positive regulation of cell-cell adhesion mediated by cadherin	BP	7	1	0.0137763
GO:2000381	negative regulation of mesoderm development	BP	7	1	0.0137763
GO:0032584	growth cone membrane	CC	7	1	0.0137763
GO:0000801	central element	CC	7	1	0.0137763
GO:0008440	inositol-1,4,5-trisphosphate 3-kinase activity	MF	7	1	0.0137763
GO:0009306	protein secretion	BP	474	4	0.0138818
GO:0010817	regulation of hormone levels	BP	476	4	0.014079
GO:0007589	body fluid secretion	BP	92	2	0.0142618
GO:0031016	pancreas development	BP	93	2	0.0145573
GO:0046883	regulation of hormone secretion	BP	260	3	0.0145662
GO:0002790	peptide secretion	BP	261	3	0.0147158
GO:0071621	granulocyte chemotaxis	BP	94	2	0.0148554
GO:0003705	transcription factor activity, RNA polymerase II distal enhancer sequence-specific binding	MF	95	2	0.0151562
GO:0090087	regulation of peptide transport	BP	264	3	0.0151698
GO:0015809	arginine transport	BP	8	1	0.0157292
GO:0045924	regulation of female receptivity	BP	8	1	0.0157292
GO:0051852	disruption by host of symbiont cells	BP	8	1	0.0157292
GO:0051873	killing by host of symbiont cells	BP	8	1	0.0157292
GO:0060453	regulation of gastric acid secretion	BP	8	1	0.0157292
GO:0060534	trachea cartilage development	BP	8	1	0.0157292
GO:0031748	D1 dopamine receptor binding	MF	8	1	0.0157292
GO:0051766	inositol trisphosphate kinase activity	MF	8	1	0.0157292
GO:0004865	protein serine/threonine phosphatase inhibitor activity	MF	8	1	0.0157292
GO:0010906	regulation of glucose metabolic process	BP	101	2	0.0170156
GO:0097530	granulocyte migration	BP	102	2	0.0173345
GO:0048617	embryonic foregut morphogenesis	BP	9	1	0.0176784
GO:1902837	amino acid import into cell	BP	9	1	0.0176784
GO:0060180	female mating behavior	BP	9	1	0.0176784
GO:0001714	endodermal cell fate specification	BP	9	1	0.0176784
GO:2000543	positive regulation of gastrulation	BP	9	1	0.0176784
GO:0015174	basic amino acid transmembrane transporter activity	MF	9	1	0.0176784
GO:0060429	epithelium development	BP	1075	6	0.017851
GO:0046717	acid secretion	BP	104	2	0.01798
GO:0007631	feeding behavior	BP	105	2	0.0183066
GO:0003158	endothelium development	BP	106	2	0.0186356
GO:0046887	positive regulation of hormone secretion	BP	107	2	0.0189672
GO:0007440	foregut morphogenesis	BP	10	1	0.0196238
GO:0097340	inhibition of cysteine-type endopeptidase activity	BP	10	1	0.0196238
GO:0097341	zymogen inhibition	BP	10	1	0.0196238
GO:1990001	inhibition of cysteine-type endopeptidase activity involved in apoptotic process	BP	10	1	0.0196238
GO:0098739	import across plasma membrane	BP	10	1	0.0196238
GO:0033131	regulation of glucokinase activity	BP	10	1	0.0196238
GO:0004983	neuropeptide Y receptor activity	MF	10	1	0.0196238
GO:0005262	calcium channel activity	MF	111	2	0.0203184
GO:0045995	regulation of embryonic development	BP	112	2	0.0206624
GO:0050680	negative regulation of epithelial cell proliferation	BP	114	2	0.0213577
GO:0003157	endocardium development	BP	11	1	0.0215654
GO:0060456	positive regulation of digestive system process	BP	11	1	0.0215654
GO:1903299	regulation of hexokinase activity	BP	11	1	0.0215654
GO:0003306	Wnt signaling pathway involved in heart development	BP	11	1	0.0215654
GO:0090009	primitive streak formation	BP	11	1	0.0215654
GO:2000047	regulation of cell-cell adhesion mediated by cadherin	BP	11	1	0.0215654
GO:0032525	somite rostral/caudal axis specification	BP	11	1	0.0215654
GO:0060536	cartilage morphogenesis	BP	11	1	0.0215654
GO:1903532	positive regulation of secretion by cell	BP	302	3	0.0216108
GO:0001704	formation of primary germ layer	BP	116	2	0.0220627
GO:0046879	hormone secretion	BP	307	3	0.0225541
GO:0051818	disruption of cells of other organism involved in symbiotic interaction	BP	12	1	0.0235034
GO:0051883	killing of cells in other organism involved in symbiotic interaction	BP	12	1	0.0235034
GO:0015802	basic amino acid transport	BP	12	1	0.0235034
GO:0060439	trachea morphogenesis	BP	12	1	0.0235034
GO:0021903	rostrocaudal neural tube patterning	BP	12	1	0.0235034
GO:0010454	negative regulation of cell fate commitment	BP	12	1	0.0235034
GO:0001886	endothelial cell morphogenesis	BP	12	1	0.0235034
GO:0009914	hormone transport	BP	314	3	0.0239124
GO:0015833	peptide transport	BP	321	3	0.0253145
GO:0015085	calcium ion transmembrane transporter activity	MF	125	2	0.0253529
GO:0060911	cardiac cell fate commitment	BP	13	1	0.0254376
GO:0042789	mRNA transcription from RNA polymerase II promoter	BP	13	1	0.0254376
GO:0007501	mesodermal cell fate specification	BP	13	1	0.0254376
GO:0042074	cell migration involved in gastrulation	BP	13	1	0.0254376
GO:0060457	negative regulation of digestive system process	BP	13	1	0.0254376
GO:0006828	manganese ion transport	BP	13	1	0.0254376
GO:0060341	regulation of cellular localization	BP	1173	6	0.0262133
GO:0060562	epithelial tube morphogenesis	BP	326	3	0.0263429
GO:0007612	learning	BP	128	2	0.0264916
GO:0030326	embryonic limb morphogenesis	BP	129	2	0.0268757
GO:0035113	embryonic appendage morphogenesis	BP	129	2	0.0268757
GO:0050755	chemokine metabolic process	BP	14	1	0.027368
GO:0042487	regulation of odontogenesis of dentin-containing tooth	BP	14	1	0.027368
GO:0044331	cell-cell adhesion mediated by cadherin	BP	14	1	0.027368
GO:0008599	protein phosphatase type 1 regulator activity	MF	14	1	0.027368
GO:0048598	embryonic morphogenesis	BP	585	4	0.0276583
GO:0051047	positive regulation of secretion	BP	334	3	0.0280348
GO:0002374	cytokine secretion involved in immune response	BP	15	1	0.0292948
GO:0050780	dopamine receptor binding	MF	15	1	0.0292948
GO:0034483	heparan sulfate sulfotransferase activity	MF	15	1	0.0292948
GO:0042886	amide transport	BP	342	3	0.029784
GO:0003159	morphogenesis of an endothelium	BP	16	1	0.0312178
GO:0033194	response to hydroperoxide	BP	16	1	0.0312178
GO:2000380	regulation of mesoderm development	BP	16	1	0.0312178
GO:0021542	dentate gyrus development	BP	16	1	0.0312178
GO:0001711	endodermal cell fate commitment	BP	16	1	0.0312178
GO:0006590	thyroid hormone generation	BP	16	1	0.0312178
GO:0043046	DNA methylation involved in gamete generation	BP	16	1	0.0312178
GO:0048565	digestive tract development	BP	141	2	0.03166
GO:0061436	establishment of skin barrier	BP	17	1	0.0331371
GO:0043092	L-amino acid import	BP	17	1	0.0331371
GO:0042659	regulation of cell fate specification	BP	17	1	0.0331371
GO:0071682	endocytic vesicle lumen	CC	17	1	0.0331371
GO:0097529	myeloid leukocyte migration	BP	145	2	0.0333245
GO:0000187	activation of MAPK activity	BP	147	2	0.0341695
GO:0008201	heparin binding	MF	148	2	0.0345951
GO:0032958	inositol phosphate biosynthetic process	BP	18	1	0.0350528
GO:0042219	cellular modified amino acid catabolic process	BP	18	1	0.0350528
GO:0009299	mRNA transcription	BP	18	1	0.0350528
GO:0001710	mesodermal cell fate commitment	BP	18	1	0.0350528
GO:0007130	synaptonemal complex assembly	BP	18	1	0.0350528
GO:0035239	tube morphogenesis	BP	366	3	0.0353732
GO:0035107	appendage morphogenesis	BP	150	2	0.0354527
GO:0035108	limb morphogenesis	BP	150	2	0.0354527
GO:0006816	calcium ion transport	BP	367	3	0.0356172
GO:0031667	response to nutrient levels	BP	635	4	0.0358478
GO:0050663	cytokine secretion	BP	152	2	0.0363185
GO:0033561	regulation of water loss via skin	BP	19	1	0.0369647
GO:0043090	amino acid import	BP	19	1	0.0369647
GO:0005859	muscle myosin complex	CC	19	1	0.0369647
GO:0051241	negative regulation of multicellular organismal process	BP	947	5	0.0374234
GO:0055123	digestive system development	BP	155	2	0.0376326
GO:0010675	regulation of cellular carbohydrate metabolic process	BP	156	2	0.0380747
GO:0097150	neuronal stem cell population maintenance	BP	20	1	0.038873
GO:0060850	regulation of transcription involved in cell fate commitment	BP	20	1	0.038873
GO:0060438	trachea development	BP	20	1	0.038873
GO:0060914	heart formation	BP	20	1	0.038873
GO:0007126	meiotic nuclear division	BP	158	2	0.0389649
GO:0072509	divalent inorganic cation transmembrane transporter activity	MF	160	2	0.0398631
GO:0048754	branching morphogenesis of an epithelial tube	BP	161	2	0.0403152
GO:0021915	neural tube development	BP	162	2	0.0407692
GO:0002021	response to dietary excess	BP	21	1	0.0407775
GO:0042403	thyroid hormone metabolic process	BP	21	1	0.0407775
GO:0070193	synaptonemal complex organization	BP	21	1	0.0407775
GO:0009991	response to extracellular stimulus	BP	664	4	0.0411846
GO:0006109	regulation of carbohydrate metabolic process	BP	164	2	0.0416831
GO:1903046	meiotic cell cycle process	BP	164	2	0.0416831
GO:0061311	cell surface receptor signaling pathway involved in heart development	BP	22	1	0.0426785
GO:0007617	mating behavior	BP	22	1	0.0426785
GO:0010719	negative regulation of epithelial to mesenchymal transition	BP	22	1	0.0426785
GO:0050716	positive regulation of interleukin-1 secretion	BP	22	1	0.0426785
GO:0032982	myosin filament	CC	22	1	0.0426785
GO:0000146	microfilament motor activity	MF	22	1	0.0426785
GO:2000027	regulation of organ morphogenesis	BP	167	2	0.0430686
GO:0009790	embryo development	BP	989	5	0.0438247
GO:0007398	ectoderm development	BP	23	1	0.0445757
GO:0032590	dendrite membrane	CC	23	1	0.0445757
GO:0048736	appendage development	BP	171	2	0.0449425
GO:0060173	limb development	BP	171	2	0.0449425
GO:0048878	chemical homeostasis	BP	996	5	0.0449529
GO:0042594	response to starvation	BP	405	3	0.0455367
GO:0051049	regulation of transport	BP	1695	7	0.0456832
GO:0030595	leukocyte chemotaxis	BP	173	2	0.0458908
GO:0044708	single-organism behavior	BP	407	3	0.0460934
GO:0021533	cell differentiation in hindbrain	BP	24	1	0.0464693
GO:0060322	head development	BP	693	4	0.0469561
GO:0048643	positive regulation of skeletal muscle tissue development	BP	25	1	0.0483593
GO:0033057	multicellular organismal reproductive behavior	BP	25	1	0.0483593
GO:0048246	macrophage chemotaxis	BP	25	1	0.0483593
GO:0045992	negative regulation of embryonic development	BP	25	1	0.0483593
GO:0034364	high-density lipoprotein particle	CC	25	1	0.0483593
GO:0016460	myosin II complex	CC	25	1	0.0483593
GO:0043027	cysteine-type endopeptidase inhibitor activity involved in apoptotic process	MF	25	1	0.0483593
GO:0042056	chemoattractant activity	MF	25	1	0.0483593
GO:0070838	divalent metal ion transport	BP	416	3	0.0486411
GO:0072511	divalent inorganic cation transport	BP	419	3	0.0495056
GO:0007369	gastrulation	BP	181	2	0.0497577

## Sheet: Location_EQLF_KEGG
KeggId	Pathway	N	DE	P.DE
path:hsa04080	Neuroactive ligand-receptor interaction	276	3	0.000341585
path:hsa04921	Oxytocin signaling pathway	155	2	0.00279849
path:hsa00534	Glycosaminoglycan biosynthesis - heparan sulfate / heparin	24	1	0.0123003
path:hsa04950	Maturity onset diabetes of the young	26	1	0.013319
path:hsa04215	Apoptosis - multiple species	33	1	0.0168767
path:hsa05030	Cocaine addiction	49	1	0.0249644
path:hsa04213	Longevity regulating pathway - multiple species	64	1	0.0324908
path:hsa05031	Amphetamine addiction	66	1	0.0334902
path:hsa05412	Arrhythmogenic right ventricular cardiomyopathy (ARVC)	74	1	0.0374785
path:hsa04260	Cardiac muscle contraction	78	1	0.039467
path:hsa05410	Hypertrophic cardiomyopathy (HCM)	83	1	0.0419472
path:hsa04911	Insulin secretion	85	1	0.0429376
path:hsa05222	Small cell lung cancer	86	1	0.0434325
path:hsa05414	Dilated cardiomyopathy	89	1	0.0449156
path:hsa04972	Pancreatic secretion	96	1	0.0483681
path:hsa04070	Phosphatidylinositol signaling system	97	1	0.0488604

## Sheet: Literature_selected_genes
gene_name	maxald	gene_id	seqid	strand	start	end	descr	entrez	logFC	logCPM	PValue	FDR
CDKN2A	935	ENSG00000147889	9	-	21967753	21995301	cyclin-dependent kinase inhibitor 2A	1029	-0.43	3.6	0.041	1
CDKN1A	15301	ENSG00000124762	6	+	36676460	36687339	cyclin-dependent kinase inhibitor 1A (p21, Cip1)	1026	-0.13	8.95	0.493	1
IL1A	5	ENSG00000115008	2	-	112773915	112784590	interleukin 1, alpha	3552	-0.6	-4.1	0.308	1
IL6	2427	ENSG00000136244	7	+	22725884	22732002	interleukin 6	3569	0.92	4.28	0.1	1
CCL2	11518	ENSG00000108691	17	+	34255218	34257203	chemokine (C-C motif) ligand 2	6347	-0.18	5.55	0.705	1
CCL8	587	ENSG00000108700	17	+	34319036	34321402	chemokine (C-C motif) ligand 8	6355	1.15	-0.97	0.043	1
CCL3	8	ENSG00000277632	17	-	36088256	36090169	chemokine (C-C motif) ligand 3	6348	-0.85	-5.12	0.301	1
CCL4	2	ENSG00000275302	17	+	36103590	36105621	chemokine (C-C motif) ligand 4	6351	0.24	-5.14	0.746	1
MMP1	56308	ENSG00000196611	11	-	102789920	102798160	matrix metallopeptidase 1	4312	0.14	9.65	0.827	1
MMP3	39518	ENSG00000149968	11	-	102835801	102843803	matrix metallopeptidase 3	4314	0.01	8.01	0.991	1
MMP10	8115	ENSG00000166670	11	-	102770503	102780628	matrix metallopeptidase 10	4319	0.13	-1.8	0.745	1
TGFB1	2965	ENSG00000105329	19	-	41301587	41353911	transforming growth factor, beta 1	7040	-0.11	6.78	0.538	1
CSF2	10	ENSG00000164400	5	+	132073790	132076170	colony stimulating factor 2 (granulocyte-macrophage)	1437	0.56	-4.3	0.359	1
CXCL8	985	ENSG00000169429	4	+	73740506	73743716	chemokine (C-X-C motif) ligand 8	3576	-0.62	1.97	0.45	1
CCL1	2	ENSG00000108702	17	-	34360328	34363231	chemokine (C-C motif) ligand 1	6346	0.61	-5.15	1	1
CXCL3	575	ENSG00000163734	4	-	74036589	74038807	chemokine (C-X-C motif) ligand 3	2921	0.23	0.06	0.758	1
ICAM1	912	ENSG00000090339	19	+	10270835	10286615	intercellular adhesion molecule 1	3383	0.37	5.39	0.266	1
TNFRSF11B	6252	ENSG00000164761	8	-	118923557	118952200	tumor necrosis factor receptor superfamily, member 11b	4982	0.67	7.49	0.032	1
CCL13	209	ENSG00000181374	17	+	34356452	34358610	chemokine (C-C motif) ligand 13	6357	2.75	-1.93	0.001	1
COL1A1	593900	ENSG00000108821	17	-	50183289	50201632	collagen, type I, alpha 1	1277	0.82	13.97	0.093	1
COL1A2	232585	ENSG00000164692	7	+	94394561	94431232	collagen, type I, alpha 2	1278	0.35	13.76	0.194	1
E2F1	407	ENSG00000101412	20	-	33675683	33686404	E2F transcription factor 1	1869	0.23	3.64	0.531	1
CCNA2	1432	ENSG00000145386	4	-	121816444	121823933	cyclin A2	890	0.19	4.98	0.575	1
CCNB1	1864	ENSG00000134057	5	+	69167010	69178245	cyclin B1	891	0.15	5.2	0.702	1
CCND1	17118	ENSG00000110092	11	+	69641087	69654474	cyclin D1	595	0.11	9.69	0.711	1
TERF2	286	ENSG00000132604	16	-	69355561	69408571	telomeric repeat binding factor 2	7014	0.01	4.23	0.974	1
IGFBP7	47459	ENSG00000163453	4	-	57030773	57110385	insulin-like growth factor binding protein 7	3490	0.03	7.84	0.943	1
GADD45A	2091	ENSG00000116717	1	+	67685061	67688338	growth arrest and DNA-damage-inducible, alpha	1647	-0.25	5.3	0.164	1
CALR	22569	ENSG00000179218	19	+	12938578	12944489	calreticulin	811	-0.03	9.99	0.862	1
TBX3	2910	ENSG00000135111	12	-	114670254	114684164	T-box 3	6926	-0.7	5.7	0.059	1
CTGF	97077	ENSG00000118523	6	-	131948176	131951373	connective tissue growth factor	1490	0.51	9.73	0.385	1
JUN	14525	ENSG00000177606	1	-	58780788	58784327	jun proto-oncogene	3725	-0.03	8.56	0.914	1
ITGA2	216	ENSG00000164171	5	+	52989326	53094779	integrin, alpha 2 (CD49B, alpha 2 subunit of VLA-2 receptor)	3673	-0.4	3.72	0.218	1
ITGB1	40252	ENSG00000150093	10	-	32900319	33005792	integrin, beta 1 (fibronectin receptor, beta polypeptide, antigen CD29 includes MDF2, MSK12)	3688	0.18	11.25	0.336	1
LIG4	178	ENSG00000174405	13	-	108207439	108218368	ligase IV, DNA, ATP-dependent	3981	0.19	3.64	0.355	1
XRCC4	143	ENSG00000152422	5	+	83077498	83353787	X-ray repair complementing defective repair in Chinese hamster cells 4	7518	0.07	2.22	0.781	1
